# Supplementary material for: Genome-wide QTL mapping of yield and agronomic traits in two widely adapted winter wheat cultivars from multiple mega-environments
Source: PeerJ. 2021 Nov 24;9:e12350. doi: 10.7717/peerj.12350 (PMC8627123; doi:10.7717/peerj.12350)
Supplement: Supplemental Information 1 [file peerj-09-12350-s001.xlsx]

## Sheet: TableS1
Supplementary Table S1. SNP sequences from 90K array
nloc = 5948 (3193 GBS, 2740 90K, 15 STS and KASP	PseudoM_CSSRef1Chrom	PseudoM_CSSRef1Mb	SNP (RADseq confirmed correct for SNP and parental alleles	Sequences
IWB35518	chr1B	1.41858	T/G	IWB35518,ATAACACAGCCCGGCCGAATCAGTGGGTCGAGAAGAATGGCTACGTACATGTGGAGCACGGAAACAAAGACGGTCATAAGATCCGGGAGTTTGAGGAGGT[T/G]GCCTCGGCGTCGGCCCTACTGCGACTGATCCAGCTATACTGGCTGAAGGCGGAGCTGTCGTCCTGGTTGCCCTGCACCATCTGCTGGAACATCCTGATGT
IWB21697	chr1A	1.17489	A/G	IWB21697,CCTGCGGAGTGGGGTTCTGAAGGCGCACCTAGCTCGGCATCTGGCCCCGA[T/C]GATGGAAACTTGCCTTACCCTTATCTTCCTACTGTCCTTGAGGAGCCTAG
IWB23713	chr1A	1.21031	A/G	IWB23713,AAGTCCCTTGCCTGCCCAAGGAGAGTGCCCTCCCTGCTGCTATAATATGC[A/G]tcgattatagcgcttgcccaagtgtgcaacacctcaggactcgtgaataa
IWB5766	chr1D	2.06707	A/G	IWB5766,TAGCGCTTGCCGGCCTCCCACCACAGCTTCTTGTACTGCAGGTTCACAAA[T/C]TGCTGCTTCTTGGTCTTGTGGTTGGAGAAGGACACCTTGTTGGCCCGGTT
IWB15519	chr1D	2.11162	T/G	IWB15519,TTCTGGGCCTCTTTGATGACGAGTGTCGAATGCAGGCTGCTGCAGATTCAATCATACGGAACATTTCTAACCTCATTGAAATTCTTCTCAAGCCTAGGGGTCGTACTAACCCTTCCAGCTTTCC[T/G]GTCTCAAGAGCTCGACTAAGCAATGGTCTAGCCTGCAAATAATGTCAGTTTGCAAAGGTTTTTTTTAAACAAGAACAGACCAACTAAATGAAGGAACATGTGGGAGAAACTGCATGTTCATCTGA
IWB11640	chr1A	1.21175	A/G	IWB11640,GTCAAGATATCTGATAAGTTGATTGGCGTCTTCATGGTCGATAAGCCTAC[A/G]CCGACGGATTGGAGGAAATTGCTGGCGTTCAGCAGGGAGTGGGACAACAT
IWB7208	chr1A	1.21193	T/C	IWB7208,CGGTCGGCGACGTGGCAGCAGCAGCAGTGCCCGACGATTACACAGAGAAC[A/G]CGCCGTCAAGCAGTGGATACGCGAATGGCCATATGGCCACCGCTTCATCG
IWB31608	chr1A	1.21119	T/G	IWB31608,TTGACCTCTTTTCCTCTTTCATGTCTTGACTGTTGCCTTTGATGGCTTAT[T/G]CRRCTCCTGATGTCATGTAACAGAGAARCRNNNNNN
IWA974	chr1D	2.10306	A/G	IWA974,CGTGATGCAGTGATTGAAGAAGGCTCCTCCTCCTCCTCGCCTATGAGGAGGAGGAGGCACAGGAGGCTCAGCAGCTGTTAGGCTGAGCACAAAGCAATAA[A/G]CCGGCCAATCATGGCTCATGTTCTTCACCCCCTCCCCCCTCTCGCTGTTTACTGTTTATTTGCTGGAAGTTTTGCTAGTCCTGCTACCTTTGGATTAATT
IWB525	chr1A	1.33972	T/C	IWB525,CTTTCTGTAGATCTCTGGGCACTTTCGTCACCTTCATCATCCGCATCAGC[A/G]TCATTCTCTCCAGCAAACTCAGCTGCTCTAGTTCTACCAGCAGAAACTTC
IWB2454	chrUn	287.286	A/G	IWB2454,GAGAACGGTTGGTTGTTTTTCCTATTTGCAGTACTCTAGTCGTACCGTGT[A/G]TGTGGGTGTTAACTTATGATCTTGAGTCGGTTTGTATTTTCCGTGTAAGT
IWB21950	chr2A	538.364	A/G	IWB21950,ATAGAGAGGGATTTGATTCTTCTTGGTGCTACCGCCGTTGAGGACAAGCT[A/G]caaaagggggtacctgactgcatcgacaaacttgctaaggctggcatcaa
IWB47116	chr1B	1.53373	A/C	IWB47116,tcctcgagcaggtcggggtggtcgtggaacagcgtagcgacctcctggta[T/G]ACGTCCTGGATGGACTTGTTGTGCATGCGGTACATGTTGAGGATGGCGAG
IWB74218	chr1A	3.38699	T/C	IWB74218,AATGGCAAGAGATGGGAAAAATTCAATAGCGAGAAGGTGGCAACACTCGC[A/G]TATGCTAGAATCCAGGGCAGGAATGAATTGGTTTCTCATTTTCGGAATTC
IWB3240	chr1A	3.44919	T/C	IWB3240,GATGCTTTGGAAGCCGATATGGACTTTGAGTCGAATTCAGTCCCATCGTA[T/C]CTCCAACCAGACAAGGAGACTGATCTTGATTCTGAGCTTAACCTACCTGC
IWB47522	chr1A	3.38282	A/G	IWB47522,AAGGCTGCCAAGGAGAAGCCAGACGCGGAGGGATCTGCTGAGGAAAATGA[T/C]GATGAGGAGGATGCTCTGGAGAAGGAAGAGGAGGATGACAGCAGCCTGAA
IWB1514	chr1B	5.15862	A/G	IWB1514,TACAAGGGATCAAGTTTCCACCGTGTCATTAAGGACTTCATGATTCAGGG[A/G]ggagactttgacaagggcaacggtactggagggaaaagcatatatggccg
IWB11264	chr1A	4.05352	T/C	IWB11264,TCCCCAAGCAGTCAAGATGTGAGGCCATCCACAACGTCGTGCACGCCATC[A/G]TTTTGCAACAGCAACAACAATTGGTACAAGGTATTTCCACCCAACCTCAG
IWB6605	chr1B	4.47885	A/C	IWB6605,TAGGTTTTGATCTCGTTGTAAATGGTCGGCACTTTGTTTATGCATGGACA[A/C]ATTCATTGTATCTTGCATCATATACCACTGCAATTCGTTGAACGATGGAA
IWB64096	chr1B	4.47892	T/C	IWB64096,CATATACCACTGCAATTCGTTGAACGATGGAATGTCTCTTTCCCTTTGTG[T/C]TGGAACAATAGTGTGTGATAAAGGGAGTGTTCTCTATACGGTTGTACATC
IWB1449	chr1A	4.06316	A/G	IWB1449,gcgccggagaagaggaaggggaggggagagggaggatgtcggactggggg[T/C]CGGTGGTGATCGCGGTGGTGCTGTTCGTGCTGCTGTCGCCGGGGCTGCTG
IWB17894	chr1D	6.33676	T/C	IWB17894,AACCCCAATCCAGAGGCGATGTCAAAGATTGTAACTGAAAATTCAAGTGAGGAGTTCTTGTACTCATTGAGCAACTACTGTGCTCTTCAGGTAAGTTGAGATATGTCTTCTATTTAAACTTGAG[T/C]CATTCAGTTTACCTGTTACTAAAATGGTTACACATGTCAGAGTGCCC
IWB54411	chr1A	9.10377	A/G	IWB54411,ATGGCAGCACCGGCCCCTCCCTCCTACCCACTGACCCCTACGAGCGTGCC[A/G]ttgctcggttttgggtagactacattgaccacaagctagtcatcccgtgg
IWB28576	chr1A	8.29696	A/G	IWB28576,GCATTCAAAGGGACCTTCATCGCCAATGGTGGATATGACCGTGAGGAAGG[A/G]GGCAAGGTGGTCACCGAGGGATACACTGACCTAGTGGCCTTTGGGCGGCT
IWB4708	chr1D	98.8449	T/C	IWB4708,actgactagtgactacattccaatggcagggctggggcacgtgggtcatc[A/G]CCATTAAGAGGAGAAGGCTGAAAGAATGTTCTTCTTGAGGGCGAACTCAT
IWB57641	chr1A	8.29677	A/G	IWB57641,CGCCGTGTGGGCATCTGCCTCTCCCCATTCACTGACTACATGGATTGCCA[T/C]GACTCTGACCCCCACTCCCTTGCACTTTATATGTCCACCAAACTCAACGA
IWB40116	chr1A	7.18452	T/C	IWB40116,AGCAAAACTCGTACAGACATTCCTTTGCCATGAACAACTGAGAGAGGTCA[T/C]GTGTACCGCCCTTGCAGTTCAAGGTACATGATCTTGCTACAGCTCCTTCG
IWB7436	chr1A	5.02418	T/G	IWB7436,CATGCTTGTAGTAAGGTTGATGACACGGTTTACAATTGGAAGCAGCGTAG[T/G]ACAAACAAAGCGTTCACGGTTGATAGTTTTCCATGCATCTTCAACCAGAC
IWB58371	chr1D	5.51841	A/G	IWB58371,GGCGGACCAGTGCCACGACGACGRCCATGCCGCCTTGGTTGCCATCGACA[T/C]CGCCATGGGCAGCCCCTACCACTTCGCGTCTTGGACGCCCGACTCCGCCT
IWB62907	chr1A	9.10522	T/C	IWB62907,AAAGCACACAACACAAGACAGTAGGCTGGCTGTGTATGTATCTATTTGAG[T/C]GCTCGCTCGGTTCGCCGTCATGAATGTAGCTCTAGATTCACCGTGTACAG
IWB43053	chr1A	9.98113	T/C	IWB43053,CACTCCATTTTCATCCCTACACATGGACCATGGCTGAAACACTAATTGAC[T/C]GCCCATGCTTTGATTAACCTCAAAAGACCCCTTGCCAACCACAACATTGC
IWB60395	chr1A	10.0554	T/C	IWB60395,CCTTCCAGTGGTCCAGAAATCCTCCTGGGTATCCAGTGTCCTACATCAGT[A/G]CCATGTCCTAGAAGTCCAACATTGTGAGTTCCATCTCCCCAGGTATAAAG
IWB7461	chr1B	10.0148	A/C	IWB7461,TCCTTGCACAGCAGCGCCCCACCATAGGTTGCCGCCTCTTTCGCCAGCGC[T/G]GCCCCGAGTGTCATCACCAGCTGCCCAACAACAGCCTCCGCCATGGTTGT
IWB24448	chr1A	10.4975	A/C	IWB24448,CATCCTGGTTGGCAGCAAACTAAGCTCCACAACTTTTGTCAGTCAACTGG[A/C]gttcatcttagtgcttactcaccactaggttcacctggtactacttggat
IWB3087	chr1A	9.19479	T/C	IWB3087,ACCCAGAACCGAGCAATGGCACGCTCGTATGGGTCAACGGGCAGGAAGGA[A/G]GGGCCTACGGTACCATAGGCATCGTCGATGTACTCTAGGATGACGACGGA
IWB33789	chr1D	7.03924	A/C	IWB33789,GTATGTGGTGAGCTGATTAACATTGCCATTTGGTGCATGCAGCTAGTCAT[A/C]CCGTGGAAAGTGGCGTTCACGGCCGACGGAGAGGAGGAGAAGACRG
3270896_1as_2772	chr1A	11.5815	G/A	3270896_1as_2772,agacaatgtatgcctccgttttacggtatccattaaacctggacacataaGccaatgaattaactattagcacatgtattacgttactaatcaaaatggtc
3270896_1as_2751	chr1A	11.5815	C/G	3270896_1as_2751,ctaagaacggttgatacaccaagacaatgtatgcctccgttttacggtatCcattaaacctggacacataagccaatgaattaactattagcacatgtatt
IWB1201	chr1A	12.0981	T/C	IWB1201,TCATCCGAGGACGGTGCAGCATGATCCTCCTCCTCGGCCTTGCTGGGCTC[T/C]GGATCGACGACCGGAGGCGCGACCGTGCAGATGAACTGGGAGAGCAGAGG
IWB7203	chr1A	12.1574	A/G	IWB7203,CTGACTCCTCTACTAGGATGATGAAGATGACGATGACAACGATGACGACG[A/G]TGAATGTATAGCTTTTAGATGCATGTAGAGTACATGATGGTGGTTATGTA
IWA4033	chr1A	12.3053	A/C	IWA4033,TATCGTCTGGCAGCCTATTGTCCACAAAGCAACCAACAGAGCACGCCTGGAATCAGGTGTACAACCATCTCCGGAGCGAGCTGCGGGGGAATAACCATGT[A/C]CAGGCTATACTTAATCTGAGCTACCATGACTTGCCTGGTGATCTCAGGAACTGCTTCCTGTACTGYAGCTTGTTCCGTGAAGACTATGAAATGTCACGGG
IWB11615	chr1B	15.4485	T/C	IWB11615,gtggttccttctctcgggaaccagggcaaggcggagggcgggaagccggc[A/G]TGGGAAGGGGTGAGGGCGCGGTGCCGGAAGGAGTGGGGCATGTTCCAGAT
IWA6172	chr1A	12.3051	A/G	IWA6172,GGAACAAGCTGCAGTACAGGAAGCAGTTCCTGAGATCACCAGGCAAGTCATGGTAGCTCAGATTAAGTATAGCCTGTACATGGTTATTCCCCCGCAGCTC[A/G]CTCCGGAGATGGTTGTACACCTGATTCCAGGCGTGCTCTGTTGGTTGCTTTGTGGACAATAGGCTGCCAGACGATACAATGGCCAATGGCAGGCCACGAC
IWB11820	chr1B	120.884	T/C	IWB11820,AAGTCTTTTTCGTAAGTTCCATTCAATTTTGTTGTTATTTATCTGAGCAG[A/G]CTATCTATCGAACTTTGTGGTTGGAGTTTGTACTGGTTGCCGTTCAAATG
IWB10394	chr1D	10.295	T/C	IWB10394,CAGTTGGCGGGCATCTCTCCCACCAGGCTGTTGCGCCCCAGAAGTAGTGC[A/G]CGAAGTCTGGAGGAGCGCGTGAGGGACGAAGGGATCTCACCTTGCAGGTT
IWB46642	chr1A	11.8197	A/G	IWB46642,ACGGCGATCTCAAAGAGCCTTTATGACTTCATGGGCGAGCAGCGTGAGTG[T/C]GATCGGTTCGTTACCTCTGCTGGGAAACATCCACAGTACTTCATAGCAGC
IWB22868	chr1B	17.3838	A/G	IWB22868,CCAATTATCAACCTCCTGACTGTGAGGGAAACAAAGGGAATAGATAGATT[A/G]CTCCAGTACACATCACGAGGTTCTGGAGCCCATTCAGTCAGCCAAAGGGT
IWA2452	chr1A	13.6708	T/C	IWA2452,AGAAGTGCTTAGCTTTTGGTAACCCTGTAGAGCGGCAGATCTTGATTGGTGAAATGCTTGAGTCTACTACTGAAAGTGAACCTCTTGAGGTAATGATGAA[A/G]GATCAGTTTGCAAACTATGTGGTGCAGAAGGTGCTGGAGACTTGTGATGATCAGCAGAGAGAGATGATCCTCACAAGGATCAAAGCTCACCTGAACACAC
IWB21518	chr1A	13.6636	A/G	IWB21518,ACCACCAAGTTGTTGAAGAAAGTCGTGGATAAGCATGGGATAGCTCACGC[A/G]ATCAAGGACATCAAGAAGGAACTCCAGGAGGTGGCTGCTAGGCGTGACAG
IWB26930	chr1A	13.084	T/C	IWB26930,CACATTGCTTCTTTCCCATCCATATAATGGTACGCTGGACAGACTCCACG[T/C]ACAAATCAGTTTCCATGCCGGGGACATAGGAAGGCCCCATGACCCGGACC
IWB11301	chr1A	13.4184	T/C	IWB11301,TCCTTACAAGGATAGCTTTGCTTTGCTTTAGTTGAGGGCCATCGTTGCTC[T/C]TCTGTTTTGCATGTTGTTACATGGGAGGGCTAGCCCATGACATGCTGGTG
IWB24273	chr1A	12.3135	T/C	IWB24273,AGTGGGTACACTCGTACTGCCTCGATCCCCCACTGACCCCATGGACGTGC[A/G]TACACTGCCGAGATCTGCGGAGGATGTACCAGCGCTACCGCTAGTCCCGA
IWB11203	chr1A	13.768	T/C	IWB11203,CGGAGGAGGTGATTGTAGCGACCAAGCGGCAGTCGAGGAGGACCACGCCC[A/G]TGCAGAGCAAGTACGACGGCTCCGACAGGCTCTCCGTGCCGGACTCCATA
IWB55537	chr1A	13.7681	T/C	IWB55537,ACAATCACCTCCTCCGCGCCGGGGTCCTCGGCGACGTAGAACTTGTCGAC[A/G]TCGTCGCTCTTGAACACTGGGTGCAGGTACGAGTCCGCCAGGTACGACTT
IWB63611	chr1D	11.6239	A/G	IWB63611,GGGGGGAATGGAATTCTGCTTGATGAGATGTCACACGGCTGGGGATGTTG[A/G]TTGCACTTGCAAACTTGCAATGCACACGGCACACCAGTACACCTGTTTTT
IWB10932	chr1A	14.3603	A/C	IWB10932,CGTGTCCTCCCTCTACCTCTTGAATACCACCTCATGTTGTTGATGCCGCC[A/C]TCCATCGGCACCGGAGAGCATCAGCACCTGATGGTGCCATTGCTGGCTCC
IWB1071	chr1A	20.0928	T/C	IWB1071,gtgaacctcttctttatcactgatggcatggaactgttgcatacgaagga[A/G]AGGCAAGAAGAGATTTGCTCGATGCTGATTGCTACCTTAGGTCCTTCCCT
IWB5896	chr1D	15.3076	T/C	IWB5896,ATCCACCCTCTGTGTTAATAATTGGAGCCGTTTCCTCCAATGTTCTTCCA[T/C]TTTTTGTTGCCTGCCTCCTCATGTCCATGTTCTGAACAATTTATTTTTCT
IWB72794	chr1A	15.4388	T/C	IWB72794,GGGCAGTGGTCGAGGATCGCGGCCAGTCCGGTGTTGGTCAGGTTGTTGCC[A/G]ATCAGCTGGAGGTCTCGGAGCTCAGGCATGCTGCTTGCGATCCCGAGCGC
IWB72793	chr1A	15.4386	T/C	IWB72793,AGCATCCTCGTCGTCGGTGACCACGTCCAGCAGATCATCGTACATGTCGA[T/C]CTCGATGTCGGAACCGCCGGGGTAGTCATCACTGATAGTGAGGTAAGCCC
IWB11248	chr1A	16.375	T/C	IWB11248,AACAACCATTCCCTCTGCTGGCAAACCAACCTCAGCAACCTTATCCACAA[T/C]AGCAACCATCAGGAGTAATGGTATAGGCATCGGGGGCCAAGGAAATGAAG
IWB7233	chr1A	20.0943	T/G	IWB7233,TCTTCATGTCATTCGACAGCGCTGTGGACGTGTGACCAATTTCCCAAGAT[A/C]AGTGGTGATGGAGAACTACAGAAAGCTTCGTCTATGATGCAGGATCTCAA
IWB5401	chr1D	19.1275	A/G	IWB5401,GATCTCAGGATCCACGAATCAACAACCAGAAAGGATACATTTGTCGTCGC[A/G]CCAGTCATGGCTTACATCTTCCTTAGGTGGTACATACTGGCAACTCAAAT
IWB36377	chr1D	19.1284	T/C	IWB36377,AAGACCTTGGCACCTCCATTGGTAGGGAGGCTCCAGCCGACCCCGGCAAGCTTGAGACCGAGATGTTGGACTATGGCATCAGCAGCCAAGAGGCCAAATG[T/C]GGAAGCAGCTTCCTGCTTGAGACAGCTACTAAAATGCATTTCTCCACCGCCGAGGCCTCCTGAAACGCCCCCGGGAGACTCCAGACTCTGCAGTAGCATC
IWB67283	chr1A	20.0945	T/G	IWB67283,acaatgcggggcgacggtaatgcactagccttcatttcttgattcccact[A/C]ACCATTTACAACACTGCTACCAGGAAGATATTTCTGAGGCATCCAAAGGA
IWB34396	chr1B	26.1862	A/C	IWB34396,CCACTGCAGTGATCATCTTCAAGCTTTAGCTGTCAGCAGGTTAACTAACTGGATACATTGG[A/C]TGCCTACTGGATGGCAGTCATTCTTGCTTTTAATTCATGGAGATACAAACCGAGTCTTCAGTTGTAACAGCCC
IWB35007	chr1D	18.0685	T/C	IWB35007,CACTAGCCTTCATTTCTTGATTCCCACTCACCATTTACAACACAGCTCCCAGGAAGATATTT[T/C]TGAGGCATCCAAAGGACATGTTTTGTCTTGTGTCCTGTGCTCATTTGCTGACCATAGATTCACTTTG
IWB42930	chr1D	19.2622	A/G	IWB42930,CAGAACTAGAATTTGGCTCACATGGTACAACAAGTTTTCCTTTGCTTCGT[A/G]CAGCACCTTCAGATGTACTTCCATCTAAGTTCGGAGCTTTGGAGTTACGC
IWB21788	chr1D	19.2647	A/G	IWB21788,tgcttccactcatcagtatctttagattgtcctactatacaaactctcaa[T/C]TTATCCAATGCTTCACCGACGAGAGACTGCTGAGGTGATTGACCTACAGA
IWA2583	chr1D	19.3136	A/C	IWA2583,GCATTCAACCAAGGGCTTAGGAAAAACTGTGCCGCTAGAGTCGGAGTTTGTGAAATGGAGGGATGATGTCGTCGTGCCTTGTGGCAAGCCAGTGCCAGCA[T/G]CTATCAGGGCATCTGAGCTTCTGTACAACGAGTATATAGTCTACAACACAGCCCAGGTGAAGATGCAGTTCTTGTTGAAGGTCAAATTCCGTCACAAGCG
IWB7806	chr1D	11.4988	A/G	IWB7806,TAAATGACAGTCGCTTGCATAAAGAGATGTTGCTTGGTTTTTTAGTAAAG[T/C]GTTGTAGTAAGTTGCTCTGTTTCGGCTGAGAGCCATCGTTGTTGCTGTCT
IWB8865	chr1B	32.8518	A/G	IWB8865,AATCAAGTAGCTAGCCATGAACTCAAAGCTTTGCATCTCCTCCTCCCATC[A/G]ACCATGGCATGGGTTCCACATCCATGAGAGTGCGACCGAGAGAGTAGCGC
IWB31802	chr1A	22.2958	A/C	IWB31802,TGTRACTATGCACTCTTGTCACTGTTTGCCCTTTCCAAGATTGCAC[T/G]GTGCTGTCAAAATCCCCTTTTCACTGTTTTGTAAATGTACTAATACAGTT
IWB59245	chr1A	21.0464	A/C	IWB59245,AAGCTCTCTCTAAGAGCCAGTTCTTGATTGCCAGTGTCATCCAGTAGATT[A/C]tgtatctcagttaatgcttcaaatcctttctggatattttccttgcttaa
IWB74173	chr1D	19.8784	A/G	IWB74173,TCATTGTTCTTAAGCAAACTGACACAATGGGGGATGGTTGCCCTTAGTCC[A/G]TTATTTAAGTACAGATCTCGCAGTTCTTTGATTTTGTCCGACTTCTGCTC
IWB9029	chr1D	20.7016	A/G	IWB9029,GGGACAGAACCCATCATATACTCTTCTATTGAATACTATCGCGAAACAGC[A/G]CTCCAACTTACAAATCGGCATGTGAATGATGACGAGAAGTACAGCGCTGA
IWA4506	chr1A	21.0432	A/G	IWA4506,AGTAGCTGTTAACACCTTGTGTCATGTCAGAAATGTTTAAGGTTGTATTGTAAATGCTTTTGCCATTTTCCAGAATATGGCCCGTATCTTGCAGACCGGA[A/G]GCCTCATGAACAGCACTTCGGCCCTTAACTTTAACAGTGACCGTGCTACCTTTTGATGACTCCTCCAAGGTAGTCGCTACTTTGTATAAATCAAATGGAA
IWB31764	chr1D	19.8874	T/C	IWB31764,CTATAGCTGACRTTTCCCTTCACTGTTRCAGCTCGATTTTGT[A/G]GTCCAAGATGGCCAAATAGCACCTTTGGTTTATGGTTCACAGGGTGATTG
IWB23185	chr1B	33.9774	T/G	IWB23185,cagatgaccaggaatgccacattcatagcatgtccgtctcttcttcgatg[A/C]TGTTGTGGCTGAGTCAATATTGGCCTTAGTTTCATCAGCTATGACTTCAG
IWB9329	chr5A	377.338	T/G	IWB9329,ACTGCAGAAGGGGATAAAACTTATGAACAAACAGTGAACGAAGCATGTGT[T/G]AGTGAGCCTTTGAACGATCCTGCTGTAATAAACAACAAGTCAGTGAGGAA
IWB7923	chr1B	38.9106	T/G	IWB7923,CATACAGACCCGAAGAATACTGAATATGTTATAGTCAGTGGAGCTCAGCG[T/G]AAGACTGAAGATTTTGATGTTGAAGATGCAGAGACGCTCCTGCTGCCCGC
IWB26578	chr1D	11.4982	A/G	IWB26578,GTCACTCTGCGTCAGAAATCGGTCCTCCAACCGGGTAATCACATTAAATC[A/G]tcatcttgagcaccttctgctatatgcgggagcaagtaaatttcaattgc
IWB34835	chr1D	11.4972	T/C	IWB34835,CATTGAAGTGTTGAGGGGGATCTTGGTCTCTTTGAACATTATTGCACAAGA[A/G]CTTGGCAACCTCGCAAGGCTGAGGGAACTTCAGATTCGCTTCAGATTCGCTTCAGAGTTAGCTTCGTATGAAGGTTTCGTGAAGTCTCTGTGCAAC
IWB43005	chr1A	22.6158	A/G	IWB43005,CCTACGTCATTGAGGATGTGGTGGACAAGTTCCTCGTACGGGTCCATGGC[A/G]TTGAGCCCGACGACAACACCAACGGATTCAAGGGGCTCATCAAGAGGACC
3310348_1as_2438	chr1A	25.4799	T/C	3310348_1as_2438,tatcgacctcatgaaccaaaccgcatcgagcagcgcaacaattgtcatggTgcaggagacgatggctgccctgtgatttagtgggtcaagctccacataca
IWB28549	chr1A	28.6204	T/C	IWB28549,CTGAAGGAAAGGGATCCATGGGTAATACACCGTGTACATTCTAGGGGGTC[A/G]TGTGACAGCAGAATCAACTTAATTTTTGACGAGCAACCAAATACCGACTG
IWB34995	chr1A	29.1917	T/C	IWB34995,CGTAACAAGGTATTCCAGCCAAACATACGGNGACGAACTGGAGTTCCTCAACAGCTGCAAGGACGCCGGCGTCGTGCACATCCTCGGCAACACCATTGTG[T/C]GNGCGCGCAGGGATTCAGGGATCATCAAGAGGATTGTTGTGGATCACCTGTATGCNTTCCTCAGGAAGGTCTGTAGAGAACACAGCGTGATATTCAATGT
IWB1739	chr1A	28.3612	A/G	IWB1739,CCAACCTCAGATACAAAGCTTCACCGGGCGAGCATCGGGTAGCCTACCCA[T/C]AGAATTTTAGTCAACTTGTGTTCAGCGTTCTGGAAGCAGCAAGGGAAACA
IWB41059	chr5A	524.323	A/G	IWB41059,CATATATACAGACCAAACAAAATTGGACACCAGTGGTTACATGAAGTACA[A/G]TAGCTAATATATAGTGGAAGGAAGCAGCATGAATAGTGACTTTGAGATCA
IWB34657	chr1B	44.0674	A/G	IWB34657,GCCGCCTCCATCACTCGCCCTTCTGCTTTTTTAAACGCCGCTTGGGGCCTGAGGCAGTCGTGCTCCTGCC[A/G]ACGAACTTGAGGACCTCGTCGATGAGCACCACGGGGAGGGGCACCAGCAGCACCAGGAGCCATTCATTCAGGCTGAGCCGCACAATGCCAAACACTTGCG
IWB63846	chr1A	29.2806	A/G	IWB63846,GGCGGCGGCAACCGCCGCAGGGGTAGCCAAGGACACGGTGAAGGGGGTGG[T/C]CGCGCCCAACTCCGATGCAGAGCTTTGAACAGAGGTTTTACTGCATGCCG
IWB21708	chr1A	27.3631	A/G	IWB21708,AATTTGCAGCAGGCTATGTACATTACCTGGTCAAATATCTCAACCACTAC[A/G]GGTCACAGCCTTAGGGTGTCAGTTGATATGCGACGCGAGTTCGGCCACAA
IWB31874	chr1B	40.9428	T/C	IWB31874,GTATGGAGCGATGCTGGAGGAAATGCCTTCATTGAATTGATACTTCACAG[T/C]TGTTTATTAAGCTAGTAGAATACCCTGACTACGTGTTAACGTAAGCATCC
IWB3419	chr1D	32.5466	A/G	IWB3419,cgccccgctgctcccgaggagatgcctcgttatgatgatcgttatggaaa[T/C]GCACGCTTGTATGTTGGTAGATTGTCCTCCCGTACTCGTTCGCGCGACCT
IWB35688	chr1A	102.364	C/G	IWB35688,NNNNNNNNNNNNNNNNNNNNNNNNNNNTTCTGCATAAGAACGGGGCAAGGAAGTTCTGGATACACGGGACAGGCGCGCTGGGATGCCTGCCGGCGAAGCT[C/G]GCGATGCCGAGGGCCAGCGACGGCGACCTCGACGAGCACGGGTGCATCGCCAAGTTCAACAATGCCGCCAAGAGGTTCAACACGTTGCTGAGCGAGGCCT
IWB5898	chr1A	150.895	A/G	IWB5898,CCCGATCTTGGTCTAGATCCAATGATGATGCTTGGTGATGAGAGGGATGG[T/C]CAACACATGGATTCTCCGTACTTGTGATAATACCCTGATCAAAAGTGGAA
IWB30738	chr1B	249.238	T/G	IWB30738,GCTAGCCAAGCCATGGCCATGATCAACAGATTGCATGAGGAAAAGGCTGC[A/C]ATGCAGATGGAAGCACTACAATATCTTAGGATGATGGAAGAGCAGGCTGA
IWB66913	chr1A	73.3244	A/G	IWB66913,ACAAAATTGAAGCATATGTGCCATCGAAATGTACCCCGATAGTTATCAAG[A/G]aaagccagttgttgcccgaacaatgagaatgaatacccttcatagacccg
IWA7413	chr1A	135.51	A/G	IWA7413,GTTTACAAGCCAGCCTAGTGAATCTGCATCTGATACAGCCGATATGGATTCATCAGCAGAACCGAATGGAAGTGACACACACATGCGCACTGTTTCGTCT[A/G]CCGATCATATGATGCAATAAGCAGCCCTGCTGCCACTGAAATCCCCGTCCCCGCACCAGCATGATTCGCCTTCAGTGATGTGGCTTCACCCAAAGCGATC
IWB34753	chr1B	95.6681	T/G	IWB34753,CGCAGAGAAGACAGCCCTTTCTATTGTCACCACATGGGAAGAACCCATTTTTATTGACCAAAATTTATTTTACATTTTGCTCAACACTAGTTACATATAA[A/C]TTAATTCTACATTTTGCTCAACACTAGTACCCAAACGAACTATTATTATGTTAGAACTATACAGCTTTGTCGCCAGGGATGACTTTCTCCGGGAATCCCT
IWB31932	chr1A	31.78	T/G	IWB31932,ATTGGACTCCCAGGTCCTGTGTGTTTGAATGGTCTTGTTTGAGTGTTTTT[T/G]GRTTRTAGCAGCTGTTGGGTACCCTATTGGTGTTTCCAAACT
IWB52903	chr1B	56.3126	A/C	IWB52903,TCATAACCATGCATGTCCAGGTTTGCAATTCCCTTGCGCTTTCTTTCACT[A/C]CTTGCTGCTGGGGGTCTCATCACTTCACTAATCTGTTCCGCCACCTCCAC
IWB1268	chr1B	119.768	T/C	IWB1268,TATGCACGGACCCTCTCAGAGTCGGGATAGATTTACAAATGTACTGGTTC[T/C]TGTGTAAATGGATCTCTCGGCTGATTCAAACTACTGTACTGTTCTGACGC
IWB9302	chr1B	129.999	T/C	IWB9302,CCTCAAACACGATCAAACTTTTATCGAGGTGCCCGTATCTACCCGCGGCG[A/G]AAACAATGCGATTCACCACCGTGGGGTCTCTGCCATTTGTGATCTCCAAT
IWB54823	chr1A	74.4371	A/G	IWB54823,TGCTCAATAAGGCTCTTGCATCAGATGCCGCTGGCTCGAGAAAGTAGTCC[A/G]CGACAAGCCATAGCAAGGGATGTCAATCTCCATTCCCCGCGAAGCAGAGG
IWB69969	chr1A	47.5852	T/G	IWB69969,ggaagtgatgatagcctctgtaaggtgtgggataggcgctgccacaagag[A/C]GCGAAACCAGTAGGTGTTTTGGCAGGTCATTTAGATGGAGTTACATTTAT
IWB60642	chr1A	73.3002	A/G	IWB60642,ATCCAGTTCAACTGTTCAACAAGTATAACCAAAAAACTGGAAACTTTGAG[T/C]GGCATTCGCGACAAAGGACTGTTACTGACCTGACTGATGGTGTTCCGCAA
IWB35115	chr1A	54.0226	T/C	IWB35115,CACTCGCATAAAAATGATGTCGGATGGAGACCTAGAGCGGGTCTTATTGTTCACACAGAAGAAGCGGTGGCAGCCGCGCAGATGTCGAGGTTTCCACATG[A/G]CCGGTTGGGTGTTGACCCATCCATACAATGACCCAGCAGCAGGCAGTATGTAGCCATTCTTGTTGCTGCCAGGTGTATACGCAAAGTTGGATTTCAAGGA
IWB14805	chr1D	50.9778	A/C	IWB14805,AATTTATTAATACATGTGAAATCAATACAATACCAACATACCAACTTAAG[T/G]CAGTGAACAAATCCACCAAAGGAAGTACAAACTATAAACATGCAATAGAT
IWB31686	chr1D	87.0925	T/C	IWB31686,CAAAAAACCATAGTTGTTTCTGTTTATGCCAATACGGAGATCCTAGCTTA[T/C]ATTCAAAGGGACATTATCAAGCATTTATGGCAATATTCACTTAAGCAATG
IWB35755	chr1A	33.3757	A/G	IWB35755,ATGTTGGGAACGTCGTAGTTCTGGGCGATGTAGATGCCGCCCGCGGCGCCGACCAGCAGC[A/G]AGAAGGTGCTCTGGATGAAGCCCATTGGGAGCAAGTAA
IWB64888	chr1D	41.7207	T/G	IWB64888,CGGGCTGAGTGAAATGCAGCCGGAGCTGGAGGCGAAGCTGATGAAGTCGA[T/G]CACAGACATCGCGGAGCTCAAGGCGAACCTGATGGACAAGGAGAACGCGC
IWB31634	chr1B	120.881	A/G	IWB31634,CATTGGAAGGCAAGGCTGACATATTAGACAAGTCACTTGCTGAACTGAGA[A/G]ACATGGGTTTGCTCCAAGAAAGAATTTGATGAGATTCTGACTCAGTTGAA
IWA165	chr1D	55.8969	T/C	IWA165,ACTGTTGTCGTTTGGAAACACCAATTAGAAGACTAGAATTTTACTAGCAGATTTGAGAGG[T/C]GTAAATTTCTACTTGAATTGTGAGTGATTGTGTGTTTTATTTGATCAGGTGCCAGTAACT
IWB35375	chr1B	56.3169	T/C	IWB35375,GGAGGTGTTTCATGTCTCCGTTCGCCTGCTTCCACCCAGCCCTCGACTCGTGAAACGACCTGAGGAGCTCGTCGTAGTCCGGGGTCCGCAGCTCCTCGAT[T/C]GACTCAGCGCTTGGCAGGTCGATCTGCCGCCTCCTTGGCGTCGAACACGACGGNNNNNNNNNNNNNNNNNNNNNNNNNNNNNNNNNNNNNNNNNNNNNNN
IWB27624	chr1A	63.0578	T/C	IWB27624,TTGCTTCGTTTGCTTCTTGAGCCCTAATTTTTGTGGATTTCTTCCTGGAG[T/C]GACAAACCACATCATAAACACACAGAACACTGAACCAACGAAGAGAGGAA
IWB11334	chr1B	50.1842	A/G	IWB11334,TCTCCCAGAGGGCGCCGCACAGAGCGTGATGAGAGGAGATCAAGGAGCAT[T/C]AGCTACAGCAGGAGCCCCAGGCGATCACTCTCCCCAGAAGCTAAGGAAAT
IWA6941	chr1A	35.9355	A/G	IWA6941,TGTATGATAATGACAAAAAATTGTGGACCTATCTGCACAGGGGTAGAGAGGAGGAAGATTTTGAGGATGATGGCACATCATCTACGAAAAAGTGGAAGAG[A/G]CCAAGGAAAGATTCAGATCCCGCAGACCCTGGTGCAGGAAACGATGATCCTGAGGATGATGGCACCCCTAATGCAAAAAAAACAGAAGAAAGCTGATGCA
IWB28744	chr1A	41.9011	A/G	IWB28744,CGTCAACGTAGTGCGCTGAGATCGTGGTCTTCTCCCCCGGCGGTGAGCCC[A/G]CGGCCGGGTACTGGACGGTCATGGTCACAAYCTTCCCGACTTTATTCTCT
IWB62099	chr1D	36.5363	T/C	IWB62099,GTTCTAGATGACAGTACCTTGAGCACTCCTCGAACTAAATCCTGCAGGGG[T/C]TCCTGTGTTTCAAGTATGTTGGGATCTCCAGGATTAGTTTTAATCCGGTT
IWB57837	chr1A	49.9954	T/C	IWB57837,RGCTTGTCGACGCCAGATGTGATTCCAGTTGACGCGAAGACGGCGACCTC[A/G]CCTCGTGACCACAAGGCTGCACCCTGAGGAAGCAGGGTGCGACCTGGCGG
IWB70140	chr1A	72.7824	T/C	IWB70140,atgcggcaaccaacggagaaattggtgacgaagtatctgggaccaccgca[A/G]CCGGAGGTCCTGTGGCCTATATCGCCACGGTTATTCGGAATGCAGACACT
3256110_1as_9226	chr1A	108.763	C/G	3256110_1as_9226,acctctgatcggcgacaaaagaaaccacccggtgttaaggatgcaagcaaCtcaccaaaatgtaactctccagttccgaatagtgccctgaaaacaccttc
IWB7124	chr1B	145.456	A/C	IWB7124,GTTTGGTGAAGCTTGCTCCTTCAAGCGTAGATGTTCCGCTTACCGAAAGC[A/C]ATGAGAAGGCACAAAATGCAGAGGACCAGGTGGTTGCTAGTGGAACTGTG
3287964_1as_16723	chr1A	38.7158	T/G	3287964_1as_16723,tgcagcccgacggttcaacctgtcaaattgcgttgtttgcaaatctgcagTattcataaacttgaacctagagcaaaagactcgaactgcatacatacaaa
182728_1as_1007	chr1A	82.0852	A/G	182728_1as_1007,tacaccgaggagataaacatggatagtgaagagttcctgcagatgcttctActagatagctgttttattcttgtgtatcttggcaatatatacgcacaagg
IWB7075	chr1A	47.806	T/C	IWB7075,CTTCACCGATACTCTTGTTCTTGTTCTTCACGGTCGAGTTGTTGGCGGCT[T/C]CTTGTTGGCTGATCCTCTGCCGGACCTTCTCCTGCCGCACATGTACCTGC
IWB72799	chr1A	36.5697	T/G	IWB72799,CCAAGGAAATTCAACCAAACCAGACCTGTGCTTTCATCAGAACTGCCTCA[T/G]cctcaaaaatggattagcgagacggttgtatcctgctcgaacgttcacag
IWB52259	chr1A	49.2823	A/G	IWB52259,ctagttggcagtgtcagcaaggatgggaaaaagaagaaacgtcacagagc[T/C]GCGGTTTTGGACTTGGAGCTTCGGGAGGAAGTCAATGCAGTTGTGGAGAT
IWB34909	chr1D	84.5076	C/G	IWB34909,AGAGTTCATACACGCTCTGACAAAGGAGAAAACAAGAGGTAATTATACACTACATGACAGGGGAGGCATGATCTTGGTTGTCCTTCTCTCGAGAGGCAAA[C/G]TCACTAGCACTACTAACCGCACTTGCTGTGCTGCCAGAGCCACGGGGACCCAGCAGTCAGATACAACGCAGCGAGCTCT
IWB28415	chr1A	42.6679	T/G	IWB28415,GAGCTGTCCTCTATACAAACTGACATGTAGTGAGAACTATTTAGCTCCGC[T/G]AGTGTAAACAGCCAGTTCTCAGACAGATGGTCACAACCAGGCCTGGAAGT
IWB12044	chr1B	101.222	A/G	IWB12044,TGTGCCGACATCCTAGCCCTCTCCGCTCGTGATGGTGCCTTCCTCGCTAG[T/C]GGGCTCGACTATGCCATTCCAACGGGCCGGCGTGATGGACTCGTCTCCAA
IWB6131	chr1A	31.7815	T/C	IWB6131,TAACAATGGCAGTCCCAGTCCTACCAGAGACAACAGGGCCAGTCCAAGCC[T/C]GAGGGGCAACAACGGTAGCCCTAGTCCTAAGGGCAATGGCAACGGTGGCA
IWB17306	chr1D	89.5976	T/C	IWB17306,TACAAGTAGAGTGTAACACTAATAACCTTTAGACCAAAAACGGCACAAGTAGGAGTTGCACCAAGGTTTTGCTAATCACACTTATAAAACCTTCAGACAAAAAACGGCCTCTAACTGGGAGGTG[T/C]CTTGCCAAGGTTTGCTTCTGCGCTTAATTCTTGCCTCGGCCACGCCTAGGAGGCACAACAGTCCACCCATCAGCATCAGGGGTAGGCTTGGAAGGTTTTGGCTGATCTACCGCCATATCCTCTGA
IWB838	chr1A	63.0526	T/C	IWB838,GATGACGATGCTGTTAGTATGAACAAATGGGTTGAAAATAACCAGGACTG[T/C]GTATTTTTCTATGAAGATTTTTCTGATAATGATACCTTTGTCTTGGGCAT
3301519_1as_7930	chr1A	91.4123	T/G	3301519_1as_7930,ttctaacggcaagacgatcgaggcatgtttcctgtgatagtgtgattgtgTtgtttatcctccttgttggccatgtagtctaagcaggtcctagatgcaac
IWB11851	chr1B	99.7129	T/C	IWB11851,TCGTGCCCAACAACATCAGGGACGAGGACGCCGGCGCGGTGGCGGCCGCC[A/G]TCCCGGGGTTCCTCCCGAAGCTGAGGAAGGTCAAGGACTTCCTGGACAAC
IWB12252	chr1B	56.3169	T/C	IWB12252,GCGAACGGAGACATGAAACACCTCCCGGAGGCACAAGAGTCGGCATCGCC[A/G]TCGTCGTCGGTCAGGGAGGCGAGGGTCCCCCTTATAGCCAGAAATTAGAT
IWB35414	chr1D	68.4467	A/G	IWB35414,AGGACTGACAATGAGATTAAGAACCTCTGGAACTCGTCCCTCAAGAAGAAGCTGCGGCAGAAGGGCATTGACCCCAACACCCACAAGCCCCTCACCGAGG[T/C]TGATCGCAGTGGAGCAGCTCCCACCATCAGCACCGAGAGGACCTCTGGTTCCAGTGATGTCAACCCGTCAAGCGCTGGTGCTCTAGGGAACTTCGGTCAC
IWB28624	chr1A	36.5693	T/C	IWB28624,TGCAGCCGGGAAAGTGGGAGATGAAGCGAGTGTCGTTGTGGAAATGGTTC[A/G]TCCCCGCGACGACATCTTATCAGTTATGGAGATTGCACAAGACATGGAGG
IWB21929	chr7D	381.345	T/C	IWB21929,ACTCAGGGAATTGGCAGGCTATTTAGATGCTTATGCAACCCTGCATATGA[T/C]GTTGACGATGACTTCGAACCCCGGAAATGAAGCAGGGASACTACGAAACC
IWB7851	chr1D	55.671	T/C	IWB7851,CAGTGATTTTGTTCTGCGACCAGACCGTCAGTGTTTTTGTTCAAGTTGTG[T/C]GTCTCTGTTTCATAGTATTATAAACTTAAGTAGCGCACTTTCTGTTTATC
IWB31030	chr1B	163.097	A/G	IWB31030,GCTGTGCTTGCACTTCAGTATGGAGCATCCAGCGAGGACATTGCCCGTAC[A/G]TGCCACGCGCATCCGACAGTGAGCGAGGCTCTGAAGGAGGCGTGCATGAA
IWB4509	chr1D	142.658	A/G	IWB4509,acctgcgtcatccagcccatcgacatgatcaaggtgaagatccagttggg[T/C]GAGGGATCTGCAGCTCAGGTCGCAAAGACGATGTATGTTAATGAGGGCTT
IWB47933	chr1A	33.3756	T/G	IWB47933,TTGCTGCCGTCCTCGGGCTTCTTGTGGGCATGGTCCAGCTCCTTGGCCTT[T/G]CCCATCAGGCCCTGCATGTAGTTCTTGATGTTGGGAACGTCGTAGTTCTG
IWB27340	chr1D	140.045	A/G	IWB27340,CTGTTTCCACGCCCCGATCTTGGTCTAGATCCAATGATGATGCTTGGTGA[T/C]GAGAGGGATGGTCAACACATGGATTCTCCGTACTTGTGATAATACCCCTG
IWB3666	chr1D	41.5977	A/G	IWB3666,GGATGCGAGCCRAACACCGTCAGCTACAACATTGTGTTGAAGGGCTTGTG[T/C]ACCGCGGAGCGGTGGGAGGACGCCGAGAAGCTCATGGCTGAGATGAGTCA
IWB74474	chr1A	47.8008	T/C	IWB74474,ATGGGCTCCTATTCATCTTGGTGTGGCCCAGCATTTGGGCGATCCCCTAA[T/C]GCCTTCGGGCACCCCATGCCCCATCAGGCACCTTTTTCATCCAACACACC
IWB65361	chr1A	58.1712	A/G	IWB65361,CTTTCAATgTCAAAAGGtACAGGATCCAACACTACgCCTTtGATGTACTC[A/G]AAA
IWB801	chr1A	64.6934	T/C	IWB801,TGCAAGGATGAAGACAGCTCATGCTCATCGGAGTCCAGCAACAGTGAGTG[T/C]GAAGGGGAAGTCGTCAGAATGAGCCGCTGTGCCACCATTTCCGTGCCTCG
IWB72041	chr1A	47.7913	T/C	IWB72041,TTCTTCTTGAAACTAGTGGTCTTCTTCGTCACATGATTGGTGTCTTTCTG[T/C]ATCCAAAACTCCGCGTTCTTGAGCATCCCGAGCAATTCATTCACGCTCTT
IWB43543	chr1A	99.0159	A/G	IWB43543,GGGGTGTTAATATACAAAAATCCATTTTCATCGAAAAAACTGTGGGTTGC[A/G]taggcaagctggtgccttatccgagcaactgcgcctatcgtgttggtgcg
IWB12561	chr1B	148.414	A/G	IWB12561,GACTGCCGGTCATACCCTCTGTACCGGTTCGTGCGCAAGGAGTTAGGGAC[A/G]GTGTACTTGACCGGAGAGAAGACACGGTCACCCGGGGAGGAGGTGGACAA
IWB66104	chr1A	107.479	T/C	IWB66104,AAG[A/G]CAAACCCACGTAAATCCCTTGAGGAGGAATATTTGGAAACTGAAAAGAAG
IWB51667	chr1A	46.2387	A/C	IWB51667,CTGAATATGATGGAAATGTGGATGTTTAAGAGGGAGTATTTATCAGGAAG[A/C]AGCTTATAGGACTTCCAATAAGCAAGAAGTTTCATATAATTTTCCTGTAT
3296694_1as_2726	chr1A	112.943	A/G	3296694_1as_2726,tgcacctgctgctgcagggtgaggatggcgcccatgcagccgtagacgggAtcgcggagccgcaggttcgcctcgtacaccaggctgttggccgcgtcgcc
IWB56394	chr1B	53.2483	T/G	IWB56394,TGCTGGCTGGAGGAGCAGCAGCTGCTGCCGCCGCTTACGGAGCACACAAG[A/C]TTTCTCACGGCGGCCACGGTGGAGGTGGACATATGATGGGAGGCATGATG
IWB4583	chr1A	108.078	T/C	IWB4583,GAGGCTTGCGAGGCAGTCAGGAGCGCGGAGCCGGCTGCTGTTGAATCTCG[A/G]CCAGGAGGCAAGGCAAAGCAGCCCAATGGTGCTCAGAATGAAAGCTGTGA
IWB44215	chr1A	97.8095	T/C	IWB44215,TAGAGGATGATGAGCACTTGAGATTATTGGCCGCAGCCTTGGCGGTGTGG[T/C]GAGCATTGATGGCGATCCTGTCAACGCAGCTCTGGGAATCCAAATTGGCG
IWB57198	chr1D	143.958	T/C	IWB57198,CAGTGGGAGAAGAACTTCTATGTCACCGCGTTAGCAGGTGCAAACAATGG[T/C]agttctctggtggtcatgtctagaggaacacaatatgcacagcaatccta
IWB40030	chr1B	162.812	T/C	IWB40030,ATAGCCTGCAGGAAGTTCTTAGCCTTGACTAGTTCCACAAACTCCTGAAG[T/C]cgcagtaraaactcgagcttactctttgatttctttaaccgggacttatt
IWB4511	chr1B	191.96	A/G	IWB4511,AGGATGCAAGCTGACTCTACCCTACCAGCAGCACAGCGGCGTCACTACAA[A/G]AATGCATTCCATGCACTCTACCGTATCACTGCTGATGAAGGTGTCCTTGC
IWB31750	chr1D	132.857	T/G	IWB31750,CCAAGAAAGAAAGTATAAATATGTGCTTAAAATGCTCCCCGCAAGTGATA[T/G]ACATARATTTTGAAGCACATTGAGGATCTGATTTGACCCACCCACT
IWB10260	chr1A	168.585	A/G	IWB10260,TCATCAGGTGACATAGGTATTATGGTCGCAAGGGAGAAGATAAATGGATG[A/G]ACATAAGTCATGTATAAGTAGTATATGGCAACAGCATCTGATACAGAATA
IWB54969	chr1A	166.322	T/C	IWB54969,CTGTGGACTCGGAACTGGGAAAAAAGTGGTGGTTTAGATGCTAACTGAAG[T/C]GTCCACCCCCTTAGCTTTGGAATATCGTTTGCTTATGAGTTACTAGTACG
1AL.1RS		NA
IWB10889	chr1A	180.413	A/G	IWB10889,CACACTAAGCAACTGCATTATGATAGGATGCAACTCTTCTAGCAAATCCA[A/G]GCGACTGTTTTGTCTTCATAATCCACATAATTGCCTATCTATTGACTGCA
IWB5887	chr1A	163.394	A/C	IWB5887,AAAAAGGAAAATGATGCTCCAGAAGGCCGGTCACGACATCAGAGGACATC[A/C]cgaatcgatcccacaaagatcttacttgcaatggcaatcatggcatgtat
IWB17631	chr1D	190.769	A/G	IWB17631,TTCAAGAAATTATACATTGGAACCCTTTTTTTCTCTCCACAATACTGGT[T/C]GCAATTAGCATGGTGTGGTATGGACATCTAATTCTAAGTTTCTTTCTGACATGTTCATGCTAGGTACTATGGATATCTGATGATGGTATTCCTGATTTAGGCGGCACATATGAAGGAGATATATG
IWB24059	chr1A	155.082	A/C	IWB24059,CTTTGACATGTCGCAGTTTTTCCTCAGCAAGAGCATATGCTTCCACATTG[A/C]TGTCACCTAACTTAACAACATCCAGCGCCAAGAGGTATAAAGTGTTGTGT
IWB35133	chr1B	211.312	T/C	IWB35133,GTCTCATGGACGAAATGCTGTAAGTGTCCAAGAGCTTCAGTTTCACCACATCCCTTGAGCTATTGGCCGCTGTTACGGCCTTGTTGAACTCCTCAAGCTC[A/G]ATCCCCCTCATGATATGTTCCATGTATTTCCCACCGTACTCTCCCTTCTTGTAAGGCAATACCCTGTTACAGGTTCCACCGCTGAACCACTCGCCGTTCT
IWB1432	chr1A	180.413	A/G	IWB1432,CGAGAGCTGACTGGAGACGGCGCAGCTTCACCGCCACACGTATCTCGCTG[T/C]TAGCAGCAGGGAGACGGCGAAGTACACAAGCAGCAGAGCAACGACGAGAT
IWB56664	chr1D	130.614	A/G	IWB56664,GCTAAATGCCCAGAAGAACAAGAACTAATTGTCATGAACAAAGCAATCAG[T/C]GGCAGGATGGATAACAGGGCAGGTCTGCAGGATGAGATGAAGAATTATGT
IWB42962	chr1D	178.46	T/C	IWB42962,ATTTCCCCACCAATTGAACATTTAAAGAATTCCATCAAGTTTCTTGTAAG[T/C]gttccagttttgtcagaaaatatatactcaacctgcccaagctcctcatt
3924767_1al_978	chr2A	393.715	C/A	3924767_1al_978,ttcactagtaatctcttcaagtcatattgtgctaaccttggaacgcagatCtgctacgcctcagtagcacacccaggagcaatggtcaggctgaacacgcc
3881748_1al_4111	chr1A	216.961	G/A	3881748_1al_4111,gtctctgagcagaattcgatcccattacagcagacgaagcagaagggacgGaaaagaaaaaaataacaagggtgcgagccagccgacaccgagtacgatcc
3884973_1al_2137	chr1A	217.359	C/T	3884973_1al_2137,agatgaaattccacatggatcacctctgctgcagccgggtcatcaaccacCggctacgggccaaccacagtgactagcacaacccgggcaaggtcctcctc
3955179_1al_681	chr1A	218.259	G/C	3955179_1al_681,tgtgcccaaaggtgaccttcgtcaagcgatcatgaacgaggctcacaattGactcctctccatccaccctgggagaacgaagatgtatcaggacctcaacc
3889714_1al_8168	chr1A	218.081	G/A	3889714_1al_8168,agcgtgacggcgggctttgctttacgatgagggagcagaccgacaaggacGacgacagcctgagctcctcgatgagattcaattcacccaacaggggcgtc
3890612_1al_582	chr7A	443.675	T/G	3890612_1al_582,gttggggcgatcggggatctttcgcattaggggtggtcttcttttattttTattccatagtcggaccttggttttatctggatgatgtaatgctattttca
3912796_1al_6427	chr1A	218.652	C/G	3912796_1al_6427,gttgtgcacacacacaacacactcactcacacacgctcacctggcgcactCgcacactggccacacacaaacaccacacacacacacactgcacccacaca
IWB20564	chr1A	222.919	T/G	IWB20564,TTTGTGTGTATAATAAAAAGTGATTGCTTCCTTGTGGATCACGTGCTAAT[T/G]TACCCCTTTATACCATTTTTATTTATCTTTAGACTAATTTAACATGTCTT
3931325_1al_1834	chr1A	221.982	T/C	3931325_1al_1834,ctttggtggaatttatgcaactcgtatagctaactttcttgagatacccaTacgtggagatgatattgagttgcctccctcttatccagattatgatgcta
3929350_1al_10797	chr1A	223.835	C/T	3929350_1al_10797,acggatcttccccaagggagggggtatgatgcggagcatcccaaggtcatCcccatggacccaactacatctcctacgaaaccacttggacccatgacacg
3929350_1al_3039	chr1A	223.842	G/A	3929350_1al_3039,cgtgatacgcaatttcaacgccatgctaaggaggataacattaaaacaaaGgctttacagtgttttacatacccccatggtgatgcggagcatcccaaggt
3932290_1al_708	chr1A	224.208	G/A	3932290_1al_708,gagcctatgggcatacacactctcttgagttcgtgcctctgggcatcacgGcacggcgtaccagcgacggccggcccacgctcaggggcttgcgcgaggca
3883506_1al_668	chr1A	224.785	T/C	3883506_1al_668,acatttccccgtagggacaaacataggaggaaagaaggacacatgacagtTaatccatgtgttccggtggaagcactaggagacatttcctcgtaaggaag
3911586_1al_11724	chr1A	224.804	C/T	3911586_1al_11724,tgtccgggggcgaggggcacacctgagctgccctctccatctgccagagaCgagggatatgccaggttcatgcgttttggccaccggaatcgacgctaact
3911586_1al_12256	chr1A	224.803	A/G	3911586_1al_12256,gagagagagatgggagataatgggagagagaagccggaacacatattgtcAtaatttgatttcctctaactcagcatccttaactggatgccaaatcatat
3911586_1al_11747	chr1A	224.804	G/A	3911586_1al_11747,tgagctgccctctccatctgccagagacgagggatatgccaggttcatgcGttttggccaccggaatcgacgctaactacggatctgggttctgcagatcc
3869211_1al_1643	chr1A	228.463	T/C	3869211_1al_1643,taacagatccaagggcaaaatacatggtggtatttacgctacttgtttagTgactcactttaacattcagatacgccagcatgattatcctttgcccaagg
3954663_1al_29	chr1A	228.427	A/G	3954663_1al_29,Catccaaatacaatcaaggtccgactacagaaccaaaataaaagaagaaccccaaatgcgacaaggtccctagtcgacc
IWB28052	chr1A	225.513	A/G	IWB28052,TCATAATTGAAGTTGGAGGTCCTGCTGGTACTTTCTTTTCTGTATCCACC[A/G]CTGCACATTCAAATCTCAGAACATGGCCAATATCATCTGCAGTCGGTGTA
3972261_1al_884	chr1A	228.225	G/A	3972261_1al_884,gccatctcggcagctgcagctgccctgtcggctgcagcagacgccctctcGttggaagcggtcgtgctcaacgcggatgcggtggcactcccggcgtaggc
3869219_1al_381	chr1A	227.355	T/C	3869219_1al_381,atatttttatgccagtgctcctctaagtgttggtacaacttgtcagccgcTgatggccaccaggggcaactctgggctggcctactggaagtttggacaat
3904015_1al_2374	chr1A	227.875	C/T	3904015_1al_2374,ccttctcagcatctgtgcatccaacagttgttagatcccttctgatcttgCggagccaatcatcagctacaatcggctcggtgctactagagaacaccggc
3953360_1al_2951	chr6A	383.571	G/A	3953360_1al_2951,gatgatcagtagtggagcccagttgggacgatcggggatctagcatttggGgtttatcttccttttcttttggatttgaccatagtcggtctatgagtgta
3955983_1al_9618	chr1A	229.188	G/A	3955983_1al_9618,cttcacacaattacatgaataaagcattacatgatccaaatacaatcaagGtccgactgcggaaccagagtaaaagaagaaccccaaatgcgacaaggtcc
3930932_1al_4512	chr1A	228.775	C/T	3930932_1al_4512,aagttcttcgggccctatacggcgatccacagagtgaatgaagttacgtaCgagctgcagctacctgagggattatcgatctttctggtcttccacgtttc
2069838_1al_737	chr1A	229.706	A/G	2069838_1al_737,cgccgtgctgcagcttgccggtttcgccacgctctgcgagggatacctcgAcatgatgtcgggcaccaatctctggccgaaaatgttcttcctcaagcagc
3980487_1al_11151	chr1A	230.013	G/A	3980487_1al_11151,tccgagttcatatgcaaaagttagagcaatcggactgcagtcctgtcacgGggcaagatgtggcgcgccccaccacacacatgtctgatgggtagcgcgag
3888151_1al_1028	chr1A	230.043	T/C	3888151_1al_1028,actgacatcatcgacacctacatctggttttggaaataatctgtgagtcaTggggactcaacaatctcacaccctcgcgatcaagactatttaagcttatg
3980365_1al_2985	chr1A	230.346	T/C	3980365_1al_2985,tgcggtgagctgcagcctgtcggtgctgacatgcctatcttgatccgcggTgctcaagcgccatgcgccaaaggtctgctcaaccctggcgatgacacgca
3902055_1al_153	chr1A	231.727	A/T	3902055_1al_153,ttcacacaatacatatatatagcattacatcatccagaatacaatcaaggAccgactacggaaccaaaataaagacgaccccaaatgcaaaagatccccga
3954960_1al_7552	chr6D	238.162	A/C	3954960_1al_7552,tgtcgggcccccaacgcttcatttatttctctattgctcagggtctacgcAtggctttatacaaggggttacatgcaacatcagcaaagcctgtacaaagg
3962107_1al_2043	chr1A	231.008	G/A	3962107_1al_2043,actgatgtagggtagggaccctaatcggctgatctttcatgaaaggagcgGatcccgcgatgtacacgaagaacacaacgagggaaacgagggtaaacacg
3894747_1al_170	chr1A	232.831	G/A	3894747_1al_170,tctaaaattcagtgcactgtggcttgattttgtcagaaattcagttcaccGtggcttggttttgtcaggacgcatatgaccatcgacatcctggggcggca
3967734_1al_469	chr1A	232.204	A/C	3967734_1al_469,tttattttggttccgtagtcggaccttgattgtatctcgatgatgtaatgAtttattcatgtaattgtgtgaagtggcgattgtaagccaattatgcatct
3877153_1al_1567	chr4D	446.464	G/A	3877153_1al_1567,acaggtgggccaaccacctgttgggcccacctatcatagacgcaaaggcaGgagcagtaagtcaatgaagctgcgtccctccctcgcgcatgagcgtggtg
1459688_1al_1642	chr1A	235.69	T/C	1459688_1al_1642,ggtttcttgatttacgcaaatctaagcttatgccacgtgctgatggtcgtTgttttcaggtgttagagaaaataaatgataatgcataaaaacataagctg
IWB614	chr1A	233.925	A/C	IWB614,TCAAGCATTTCACCGGCATTTCTGCTGGAGCTGTCCATAGCAGACATACG[T/G]GCACCAAGCTCACTGCACGCATTCTCTAGAACAGCATTATACATAACACA
3958187_1al_1355	chr1A	237.05	C/T	3958187_1al_1355,cgcctcgtcgagcatgcaaagtgccttaccgccatcgtggctgcagcacaCgccacctcagaggcgaggaatcaggagatctacgaggagaacgacctctt
3937255_1al_417	chr1A	234.178	C/T	3937255_1al_417,ccactgcagcaaccttctgtacccaagagatcccatcttggggccttttcCggagctccgtcggagggagaatcgatcacggagggcttctacatcaacac
3891577_1al_1439	chr1A	236.817	C/G	3891577_1al_1439,ttgactagattcatttaagaaaaatatatttctgctctccggcgcgacttCtggaaattgtctcttctttccaaagtcgtcttttctctgccttataaagg
3958187_1al_1057	chr1A	237.05	T/C	3958187_1al_1057,attgatcccctatacttgtgggttatcacggcccgaaggcgggaggtggcTgtcgtggcctccaccccactgtcggccactgtggccatcacccactccac
3876515_1al_5671	chr1A	236.135	A/G	3876515_1al_5671,ttatctgtggcgttgccgtgtttggacatcggatccgtactatgtttgccAtctgcagtttcatcgtgctctgccgctgggtcaatgtggtgtttgtttcc
3975622_1al_1296	chr1A	238.313	G/A	3975622_1al_1296,cctttggcgcatggcacttgagcgccgcggatcaagataggcatgtcagcGccgacaggctgcagctcgccgcacaacatgatcgatggcgcgctgcagag
3889366_1al_3094	chr1A	245.712	C/T	3889366_1al_3094,accaacctgcagtagtgtaagtactacgggcctttgattgggccagccttCttaacctatatgggcctatgttgggccctgccacgtgccgacgtatcata
3918660_1al_5559	chr1A	242.544	C/G	3918660_1al_5559,catggtgtgccaactggccggtccgtctcccgtgttctactcttcctcgcCaaagaccgcaccatcgtcttgaaccccgcactggtacatggagattgcag
3965157_1al_1924	chr1A	240.718	G/A	3965157_1al_1924,agagggcgtctacggcagctgacaaggcagctacaacagccgagacggctGcagctgcagctgcaacggcggctacaaatgccgagagcgctcgagctgcc
IWA2817	chr1A	239.902	T/C	IWA2817,TAGCTCAGTTGTGTTCTGCATTGCTACCTGTGGTACTGGTCCTGGTGGGCACTGACCCAAAATTTCCACAATTTATTAAACAATTCTGCTATCCCAAGTG[A/G]ACACTAGAAGCTTTCATTATTGCTGGAGCAAAAGAGTATTCTGGTGTATGGCTGATTACTCGATGTGGAGCACTGCTAAAAGGTGGTTATAATATCAATT
3952871_1al_5685	chr1A	243.234	G/A	3952871_1al_5685,acgccgcccgtgccgcccgcggtcgtcgccttgccatcgcccccactcccGtcgccgtcacggctgcagcgtagacgagcggcagaatctaggacgaggca
3971200_1al_1468	chr1A	239.976	T/C	3971200_1al_1468,aactttgtgatgttctcctccatgacggaggagaccatccacttgccttcTgctccggacatgcttggagtggtttgagaagaaagacgcgaacttgggcg
3971671_1al_1464	chr1A	239.319	A/G	3971671_1al_1464,cctggtggatgtcgaggcttctccacgtgtctcactgccggcattagctgAagtgggttgaggggctgcaggctcggggtagcgatgaggaccatctcggg
3925142_1al_3812	chr1A	242.535	T/C	3925142_1al_3812,gcctctggatgaacagtgagcactgttggggggtttggatgaacaattccTggtggggggttggatgaacaggaccccgtggtagtaaaggccatttccgc
3972494_1al_608	chr1A	240.992	G/T	3972494_1al_608,catattcgttgttgaactagaaccacggcgcaagcggaaacagacatgagGgataatgcttgacagattaacaaaatttaaaggaggaagagtggagatcc
3924426_1al_773	chr3A	673.881	G/C	3924426_1al_773,ggacccaccagctacatcttcgcacgcaaagtagtgcctgatagtcgggaGccacctggtcaaaacgtacgtagcgttgtcattctagtggcgaacatgta
IWA3442	chr1A	245.524	A/G	IWA3442,cgctcatgtccctcacttactaattttctgcggagataaaattcattctcaaaacctgccttcattgtcacattgaattcatccagcagaacttttgtga[T/C]TTTCCTTAAGGCATATCTAGGACAGTATTCCCAGGCTTCTCCAGGCCTAATTTGCATGTCAGCTATCACCATTTCCTCACGTGTTGACCATGGGAGTCTC
3909278_1al_753	chr3A	137.745	C/T	3909278_1al_753,gatgcagcggcaattgcctaatgagctgcagcttggaggcgagctgtctcCgcccttctttcatactcggtcgcctcctccctggttataaatatctcccc
3963470_1al_5930	chr2D	611.218	G/A	3963470_1al_5930,aattgcaacaacatctctggccgcatcgcgtagtaacacagttgtctttcGatgttgttgttccgcaacaacattgttgttgtagaaacttggagtcggca
3920801_1al_2252	chr1A	250.828	A/G	3920801_1al_2252,agctgcagaaatcgtgtctgggaaacccttcttgttgtggactaagttcgAagatccgaagtatgctcctccggaccggctatggagttctgcggacgcgt
3877500_1al_3132	chr1A	250.911	G/T	3877500_1al_3132,gaactataaggacaataagttaaaaggcatactgaatatgccgcctcccaGctttttgttctccttcaaggcatcctctagttgggcttgcacatctttca
3926916_1al_900	chr6D	111.785	A/G	3926916_1al_900,gtaaggcgcaggacagcgtggtcggagtggttctggtacgacgcacgtcgAcgtcatggaggcagctctgcctcagcttcagctgctaagtccttgaggga
3923134_1al_161	chr1A	251.309	C/T	3923134_1al_161,aggcgagctcgaggggggttggggacgtccggagtagcgggatctgacgaCggacgacgaccaccgtggcggagaagaccgacgatggcgacgtgatgcgg
3939428_1al_3475	chr1A	254.989	G/A	3939428_1al_3475,tgcaggaggtcctcgacggcccagccggacgacagcacctcctgcaccacGtccgagatcgacgctgccctggggatgacggcggttggcggcttgagaga
IWB27561	chr3A	175.923	A/G	IWB27561,AAGAAGATAGCATCCGCCGTGAAGACAACAACAGACTGATTCCTCCACCA[T/C]GTTGTTGCCTATGTAGCCTTCGCTACGTACTGCAAGTTATTTCATATGAT
3869222_1al_2754	chr1A	260.135	C/T	3869222_1al_2754,cttcatggcttttggaacccgcacatgcactgtggacagctccttcagcaCgtcaccttgaaatccggatacttactcttccggctgaccagttagtagac
3968863_1al_857	chr5A	450.657	C/A	3968863_1al_857,gcagaagacacagagacaaaattgaatctgttttaatgctatatcctttgCctgaaaaccggagaagcgggaacgaccacccgacaatccaggcgtgcgtg
3944413_1al_198	chr2D	620.309	G/A	3944413_1al_198,agcggagctgtgtggtgaccagagaaagacgacgaaaagaaggcacacacGcggaaggggataaagcggtttgtggataaggatctgacggtctatataaa
3923348_1al_7603	chr1A	256.699	A/G	3923348_1al_7603,ccatagcgatttgactatctcacacatcagatcctcgaatctacgatccaAatcagctctaggcgtcctaggtcgctcgcgcgacgcacataccatttcgc
3954174_1al_768	chr1A	259.146	A/G	3954174_1al_768,ccgtttctagttcatcagtagtggagcccagtcgggacgattggggatctAtgtagctttcggggtagtcttctcttattttggttccgtagtcggacctt
3934426_1al_763	chr1A	257.806	C/T	3934426_1al_763,tagcttgctctgtggcgggccatcgatcatgttgtgcggcaagctgcagcCtgtcggcactaacatgcctatcttgatctgcggtgctcaagcgccatgta
3951308_1al_1246	chr1A	256.922	C/A	3951308_1al_1246,ctgggaatgagctcgagggcggcgtgcccgtggagctcacgaaattggacCgcatgtggtacctgaacctgatcagcaacaacctcaccggagcggtgccg
IWA352	chr1A	255.899	A/C	IWA352,TATAAGAATTTGTAGTTTGTACGTTGTACTTACTTTACTCCAGTTATGTAATTTGTTTAY[T/G]CACAAAATTATTTATCTCTAGCAGGGGAGCAGATAGAGTTGTAGCTTCTTTATGCTTTTA
3959513_1al_1306	chr1A	262.911	T/C	3959513_1al_1306,ggcataggctgcagtaatcctgctggcttttgatgttctgccttcactctTtgacatacatcacatactactacatacttggcaatatccttcttcattcc
3948391_1al_12522	chr3A	97.0449	G/A	3948391_1al_12522,ggccgctgccgaccagtggttgttgctgctgcagccgtggagttctgcccGggctgggtgcctgccatgaagactccagctcgattcggcggctcaaaggg
3948391_1al_12573	chr3A	97.045	A/G	3948391_1al_12573,ggctgggtgcctgccatgaagactccagctcgattcggcggctcaaagggAtctagaatactgctgccatcggaacagcccccaagcatgccatcctgcag
3878158_1al_6421	chr1A	263.696	C/G	3878158_1al_6421,atcattattttctgtgtaataaggaggcacttccttgctgcggccgtggaCccagttgccagcgtctccatgtacagtactcttccgatggaattcgttcc
846120_1al_517	chr1A	263.488	G/T	846120_1al_517,gcatgtgcatcaacttcaaataactcaataaagcttgccctaaggagcccGtccccctccctcgcatcgatcaaatcattgatgctactgcaggacacgac
3941412_1al_2073	chr3A	295.809	G/A	3941412_1al_2073,ttaacccgaggattcttaatcaacaacccgggccagtgctcctcatgagcGttggtccaaactagagccccttgcagcgctgccacggggaaactcgagga
3886553_1al_4234	chr2D	287.571	A/G	3886553_1al_4234,ctaacggattaagggccgcttcagcgtcctcagccctcttcagcagagctActttccctatgtcccagcctacccgctcgctcttgaagctctcctgcagt
3923289_1al_1437	chr1A	264.204	C/T	3923289_1al_1437,gcgttgtgaggcaaaggcttcataatgctcaacatttggctcatgttgggCtctggcttctgaaaaatgctctccaaagcattctagtgttgttgacaacc
3942810_1al_915	chr1A	275.314	A/G	3942810_1al_915,ttaaaaagcaaattaaactgcagcttgggcgccattaatggagaggatacAagcaaggcgggcggccatggaagtcaaagggctcgcttcccagtgagcct
3880085_1al_303	chr2A	158.984	C/T	3880085_1al_303,tcttcatcagttacaaactgcagcagacccacttgcttgaagcaatccaaCgcttcctttaaacagggcagaccagcaatggcttcaacatcaaggcgctt
3969851_1al_3465	chr1A	266.124	T/A	3969851_1al_3465,gatgctggtacaattaaagcggatgctgcagctggtggagtaggtgatacTgtgtttgtagatttagccagtcgacttggaccttctactgcactataagt
3955980_1al_838	chr1A	267.723	A/G	3955980_1al_838,ccaagctgcagctcttcaggcagtagctgccacatctcactacaaccccaActacgactttggatatccaccaggccagcagtagccatagaccaacttag
3968628_1al_3030	chr1A	271.7	C/T	3968628_1al_3030,gccgctgtcagtgctagagcaactgccggtgcttgatctgtgcgagacaaCggcgatcgtgtctggaatgctatgattagctttctaacttgaccaggatc
3884612_1al_284	chr1A	268.202	C/T	3884612_1al_284,gtactaagatgcagcggcaattgcctaatgagctgcagcttggaggcgagCtgttcccgccctcctctcgtactcggtcgcctcctccctggttataacat
3957482_1al_1433	chr1A	272.272	A/T	3957482_1al_1433,aggggctactgatacatatgaatcatcagattcacttacccgtacatcctAtacatattgatctgcggctctgactaggccatcttgagcagcacggaggt
3876959_1al_9662	chr1A	271.787	C/T	3876959_1al_9662,cgaatccacgacccattggctgcgccgagtcatggaaataatacattcatCtgataagatggatgccggctccgcggtcttaatgttggagaaaaattgtc
3973774_1al_1826	chr1A	279.137	T/C	3973774_1al_1826,acttgatttctctttgaatatcttcatggtttgatccgtcgagtggaattTgatcttcacccggaataactttgtatttgcggcgcaactccgaaggagaa
3980542_1al_2399	chr1A	269.292	A/C	3980542_1al_2399,gtccgactacggaaccaaaataaaagaagacaaccccaaatgctagatccAtgatcatcccaacttggctccactactgatcaaccggaaaagacataaaa
3966086_1al_1943	chr5A	277.644	T/G	3966086_1al_1943,tgctcctgctttctttgattttcagacaaaagggagatatgttataaccaTgtaggaggcgagcgagtacgcgaggaggatggaggcagctcgcctccaag
3959463_1al_7309	chr1A	275.77	G/A	3959463_1al_7309,cgccggacctgcagccacaaccggcctcgacgggagtccagcgccggcgcGggacaagcggccaccagctctaggggcagccttgcgtgaggcaagagcag
3898009_1al_3819	chr1A	266.343	T/G	3898009_1al_3819,tgctgcagcggaggcctcaccgcccccatactactcccaccgctagctagTccatccctccactcacccacaccccctgttattctgcggcgacggcagcc
3876353_1al_4394	chr1A	269.328	G/A	3876353_1al_4394,aaagagacgctgtgtgctccctcgagcgtgttttccaagctgcagcaatcGacgaccccggcagttagggcgagcgccctcctgaggccacccccaacgag
3929311_1al_694	chr1A	278.077	T/A	3929311_1al_694,caatcaagcgccacacgtcgaccaaggcacaggcggttagagcctgcagcTctccgcacttgccctttggcttcgccccgaagccaagtccgcgcgcgcct
3896637_1al_112	chr1A	265.846	T/C	3896637_1al_112,ctgcagtccagtactcgcctaggttccctcactaagagacttagctgcagTccagcactcgcctaagtttgaaaaaaaaatcctaccgagtggagagcgat
3878679_1al_1414	chr1A	279.361	A/G	3878679_1al_1414,ttccattttcccgcatctttcgttgtaagtattcaccttgccaatttgcgAcaggaactgcgaaaggccataaaggaggtcagcagcccttctccacaacc
3977126_1al_1588	chr1A	266.532	C/G	3977126_1al_1588,acataatggacaaaggcaccgatctctccaacatgatccaggtgatgcctCgcctgccaacgccagaagacccgtatgtgggatttcaatccggagggccc
3840541_1al_2723	chr3A	423.372	T/G	3840541_1al_2723,gaaaatataaaagtaaagaaaaaatgaaaataaaacagaaaaagaaaaagTaaaaataaaaaacgaaataaaaacataaaaacctggttcagggaaggttc
3941757_1al_960	chr4A	391.988	G/A	3941757_1al_960,aagctgaattgctagtccagttctggatgaaccaaactgcagggtagaccGgactcgtctgacagtgtctgggggcttgatggctgatgaagtattcggct
3905040_1al_7362	chr1A	277.856	T/C	3905040_1al_7362,ttcttaggcaatcttgagtgaactgcttcgggaaccactatgaacgaaaaTgattcacacattgttgtctaacaactcattatgagcagtaaaaagagaag
IWB6744	chr1A	272.313	A/G	IWB6744,CATGTCCCGGTTTATCCTTGATACATTGTTGGTAACTCATCTCCCAGTCT[A/G]GATCCATAACATTTTGCCCTTCACAGCCCCTTTATAGTCTTGACGTACTG
3879066_1al_1257	chr5A	274.059	G/A	3879066_1al_1257,cagagagagagaaggccagccacttacctggagctggcccagttggcccaGcccaccaacccctgccagtcgtctcctagcttctgccaggaggacgacgc
3978741_1al_4866	chr1A	277.813	G/A	3978741_1al_4866,aggaaaggtttttataacttacccggccacagttttcaaaggggggagttGagttgttgtcgattcaccagaagatgaaggaggtgtcacctgataatttg
3940533_1al_540	chr1A	272.024	A/G	3940533_1al_540,tccacaataatagctggggtcgtactgtgatgtagtagctatcgcctgctAagctgcagcgtggcgacgagcggcctcctctctcctctcatactcatctg
3941075_1al_2227	chr1A	273.689	T/C	3941075_1al_2227,ggggctaggaaatcgctgcagctaactaatagttgcgcgttccggaaaagTgctactgatagagtcaatagtagtagcgcgggtacagacagcgctactac
3910235_1al_1746	chr1A	274.284	T/C	3910235_1al_1746,ttagttgttgcctgtacggctgcagctactgctacaacagcggctgcaaaTgcggagagcgctcgagctgccgtccatgccgctaatgtcgcctgtctcga
3978710_1al_6414	chr1A	281.211	A/G	3978710_1al_6414,gttgttgttgttgccttggttttggatgagcatttgcattaaggcattctActattggatcagctgggtgagctccggcgggaaagtgaaaccgggatcat
3880871_1al_754	chr1A	280.901	T/C	3880871_1al_754,tcgcagtctaaaccctagcctcttcctcctcccgccgccggacgcgtccaTcccgtcgccggacacgtnnnnnnnnnnnnnnnnnnnnnnnnnnnnnnnnn
3922416_1al_1034	chr1A	283.087	G/A	3922416_1al_1034,ccgcactgcccgaccccaaacattctgacataattggaggctctgccaacGcaataacatcttcagcccatgtaataatggcagtcatcgccccgtggata
3903299_1al_3644	chr1A	284.624	A/C	3903299_1al_3644,tcgcggaaggcatcttccaactcctcccagctggcaattgagttttcaggAagactgtttaaccagtgctgagctggtcctttgagttttaacgggaggta
3945340_1al_1298	chr1A	284.219	C/A	3945340_1al_1298,taccatttggttgattttcttttttcaagaacaagcaaaaccaatgttgcCtatcattgtcattaaggagagagagagtgtcaattgcaagctatgagcgc
3911992_1al_543	chr5A	358.173	C/T	3911992_1al_543,atacataaatatatcattacaatcatccagatacaatcaaggtccgactaCgaaaccaaaataaagacaatcccaaatgcataatgtccccgatcgcccca
3963034_1al_799	chr1A	283.316	A/G	3963034_1al_799,tgaactgcaggatggtaagtaagaaccctgcagccttctttttactgctcAtaatgagttgtgttagatgacaatatctgaatcttttttcttttgcagtg
3968338_1al_936	chr1A	289.22	T/C	3968338_1al_936,ggatggcctcgacccgggccatggcgacatcagcagcacggacaacaactTgagtgctctcggtgtttgcaaccgccgtcccagcagcagctgcagccgtc
3940555_1al_963	chr1A	289.622	A/G	3940555_1al_963,tgtcgtcaatactccaaaaccaagtaggggtggcactagatgcacttacaAagagcaatcctcccactcgggggcttagctgcagtctcgtactcgcctaa
3938620_1al_2774	chr1A	290.37	G/A	3938620_1al_2774,gcattaaagaaaacaaaaaaaaatgaacagaaaaggataaaaaacaaaagGaacttaaaaactaaataaatgaaggaagggaagtgtataggcatcaacgg
3909230_1al_1823	chr1A	290.732	G/A	3909230_1al_1823,aaaaagactttgtctcaaagaagaagaaaattgcggactagggtgcgtgtGggtcccggataatgaccacgatatagaccatataagagcaggagccctat
3956900_1al_1584	chr2A	514.302	G/A	3956900_1al_1584,gagctgcagcttggaggcaagctgcctccgtcctcctctcgtgctcatctGcctcctccctggttataacatatctcccttttgcctgaaagtcaaaggaa
IWB65677	chr1B	324.791	T/C	IWB65677,TTCCTTGTTTCgACAAGCTTGATAGAAAGCtCCGCAAGAGTCTTCACTTC[T/C]CTA
3947291_1al_2591	chr4A	432.756	G/A	3947291_1al_2591,tcatttttattattccaatcattttggttatatcttgatctagtagaataGagttttagtatgatctagccttgagctttgctttatgttccctctatgta
3895532_1al_4072	chr1A	294.141	G/A	3895532_1al_4072,aacggacagcagcaaaaaaagaccgcgttgaccctgatcaaacggccaacGaaggctgaaatcggggaagccttttccatgcgagttggccagcttcatta
3895532_1al_3915	chr1A	294.141	C/T	3895532_1al_3915,cgtccatgacgcgtgcacgcggcgctgcagaagaggccgctcgcgcacccCaaaaacgggcacccaaccaatcggaaatcgcccgagcccacaggtcattc
3915571_1al_2402	chr7D	214.963	A/G	3915571_1al_2402,ttgcttatcatctccttagtatttttactacaaaaaaataaataatacaaActctgtctttgatggaacaaaacaataagcatcacatgcaaatacggagt
3915571_1al_4855	chr1A	294.735	A/G	3915571_1al_4855,atagcagcggtcgcagcgcatccccgtcgagcccctgggtgactgcaggtActcgacgccgatcgtccgcagcgcacaccacttgcgggttgcggcgcggc
3915571_1al_7435	chr1A	294.738	G/A	3915571_1al_7435,agcgcgaagtcggccgcagcagaggagagcagctgcaggtgaagaccaacGgagcagcttcgctcgaggcggaggcgagacgagccatagtcgcccggagt
3915571_1al_7624	chr1A	294.738	C/T	3915571_1al_7624,agtacttgctctcttttttttttcttcagtagtacttttgactttaatgcCttgatgtggacaccgagttacttcctcctttttggtttatagagcttatc
3936802_1al_2869	chr1A	295.465	A/G	3936802_1al_2869,gccagcgtcgcaccgtcggagccagacttgtagaccttggcaccttggccAgcttggcgcatgccctgtaccccgctgcgcccaccacatgtcatgtgtcg
3979750_1al_6871	chr1A	295.73	C/T	3979750_1al_6871,ctctgctcgcgtcccttggcaagctctgctcgctgttaggcgctgcagcgCgctatgctcgccgttaggcactatgatgcactctgctcgcatccgttggc
IWB65334	chr1A	301.197	T/G	IWB65334,TCCCTTGCgGGGTGATTCTCAGCAACAGATAGCCCTCGCGGaATGGGTAT[T/G]GC
IWB12189	chr1A	298.116	T/C	IWB12189,TTTGTAATCAGTACTATGCCCCAGTATACCTGCATAAGACTACTACCCTT[T/C]GCTATTGTAATTGTAATCAGTACTATCTAGATGGATGATAGCAGGCAATG
3875685_1al_8659	chr1A	298.655	A/G	3875685_1al_8659,gcttagccgcggaccaaagtgcggcgctattgactctctcactgcaggtcAcgtatccttggctctctacttggcgccacccgtccctccgatgctgccgg
3969003_1al_1696	chr1A	297.65	C/T	3969003_1al_1696,ggcgtctctccggcggcagctcaacgcggagagtctctccggtggcaaggCggctctgtgacagaggtaggcgggactgcaaaatcagcgcaggggacgcc
IWB71415	chr1A	301.198	T/G	IWB71415,TATGTTTAATACCCAATACTAACTTAACAAAAAAGAACATTTTCTTTTGA[A/C]TGGTATTTGAATCTATGTGGAGGATAGCAGAAAAACATTTTGCACTTGTT
IWB6481	chr1A	298.117	A/C	IWB6481,ACAAAACCACCAATGAAACCCTTATGAACATTGAAGTGGTGGCGAATAAT[A/C]TGAAGGACAGAAGCCACCATTTGGAGAAAAAACTATACAAGGTTAAAAGA
IWB31380	chr1A	298.109	T/C	IWB31380,GGTGACTGTTGCGGGTTGGCAGCGCGCCGTGTAGCTGCGAGACAACTTCC[T/C]tgttgatctgccgtcctgctgcagtgttatatactgtcgaattccaaaaa
IWB44534	chr5D	30.9225	A/G	IWB44534,ataatccatccaaatgttcagattggtccagacactgtaagggtgccagc[T/C]AGAATGATGCTTAGTCTCCTGTTAGAGCGGCTTAACATACCTGACGGCAT
3980528_1al_4564	chr1A	301.132	A/G	3980528_1al_4564,ccatgtgatttcatcagggatctccagctgcaactgcacagcggcgagtcAgatgcatctggccagcacaaggaaatcgtgaaggagagcattggtgtttc
3888483_1al_4013	chr1A	296.241	T/A	3888483_1al_4013,acatagcagatgcagctaagctaagctagcacaaacccaaaacccagcaaTcttccgaagcctgccacgtggcacattttttcgataaaggacgttttatt
IWB7828	chr1A	301.782	T/C	IWB7828,CTGCTGCAAGCTAGGTTTCCTGTGCTGCAGTTCAGCAAGGTGGCTACATC[T/C]TTTCCAGGAAGCATTGATCGTCCACAAATATCACAAACTTTCTCAGCAGC
3933603_1al_2019	chr1A	302.819	G/A	3933603_1al_2019,agtcattgtgtggttgtgctcacgcacaagcacacacatggggtgttggcGgccatggccaagtaccaccagcagcatgcggcaatagccgagcagcggcg
3912204_1al_3046	chr1A	302.452	C/T	3912204_1al_3046,ctcgtccataagtttctcgacgatgacgctggtcctcttcaacgaggcagCggtctcctcctgctgctccgcacttccgacgatcttcgcccttagaaggt
3933603_1al_2235	chr1A	302.819	C/T	3933603_1al_2235,agaagaagtcgtagcagctgcagcggcgcagtagcttgatgcagcggcagCgaggtcaggtggaggtggctgcaggcgggcgcgcggggtcgcgtgtgcgg
3954468_1al_1015	chr1A	301.397	C/T	3954468_1al_1015,ggcctctcgccctggcggcctcaagcacgacctggagacgttcctcagtgCcgggctgcaggccgtcgtcgtggactatctggcatagccagctgatgctc
2618979_1al_2803	chr6A	590.025	G/A	2618979_1al_2803,tggagttgcaagtatccatcaccacgtgcggaagacgtctgttgaactctGcatccacttcctcctcggcagcacgtcgtgccatctgcttgcgcctgcgc
IWA2651	chr1A	305.003	A/G	IWA2651,ACTGTTTCGATAAGGTCATCCAAATATCGGGCTGAAGAGTTATAGATGACGGTGCGCCAGATAAATGSTCCTTGTAGTTTATTCAAGATGCCCTAAGCCC[T/C]CGACTGATGATTGTATCATGCATATCTGGTGGAGACCCCAAAATCATTTATGCCAAGCAAGCGGTGTTGATACTCATTTATACCAAGCGAGCGAGCTGGT
3772306_1al_561	chr1A	307.568	G/A	3772306_1al_561,tccatgctcacctctccctggtggaaatctctcgacccagaactcacgctGgccatggcttgattgttttttgtggatgaggagttgaggaggaatctgca
3931040_1al_4775	chr1A	307.689	T/C	3931040_1al_4775,cattgaactcagcacggctgcatgcacacacccaagcaaggaaattaacaTgtaagcaacaacaagtttcaaggaaatatatatagataataaaaccacca
3936265_1al_2460	chr1A	307.385	G/A	3936265_1al_2460,ccatcttccaaggcataggttcaccatcatagaaagatgatcgagtctccGgaatcctcgaatctgcagccaaactcatccttttgaatctatattcatac
3772306_1al_358	chr1A	307.568	G/A	3772306_1al_358,gggacctccgtgcttcttcagcggtgcagtgggacatctctgctgcttccGtggcatggacggaccagtctcctacattgacggcgcggcgggacctccgt
IWB25829	chr1A	306.984	T/C	IWB25829,TCCAMTCCCCTACAAGCTGCTAGCTCCACTCTGCCAACGCCATCGGCGCT[A/G]CTTCAATGGGCTTGTACTCTGACTCAGATCACGAGTTTGATGAGGGCCTC
3916820_1al_4455	chr1A	304.105	C/T	3916820_1al_4455,gctatgtctccatgccttttgggctcaagagtgcctaggcaacttatcaaCgatgtgttcagaattgtcttcaaaagcagattgggcgtaacgttcttgca
3955448_1al_1513	chr1A	308.745	G/C	3955448_1al_1513,actgcatcagggcctccatctctgctggcgggtcttgctattacggccgtGtggccgcagcctctgccgagtcactacgggctggaaggaaatccggacga
IWB7637	chr2B	794.433	T/C	IWB7637,TCCAGCATCCAAACCAATAAGACTAAAATAATCTAAGAGTACTATCACTA[T/C]AGAGCAACAATTTCTGAACTTGTTGTCATTCAAAAGTAATAATTGATGGA
3955448_1al_1515	chr1A	308.745	G/A	3955448_1al_1515,tgcatcagggcctccatctctgctggcgggtcttgctattacggccgtgtGgccgcagcctctgccgagtcactacgggctggaaggaaatccggacgacc
3980288_1al_1178	chrUn	160.819	C/T	3980288_1al_1178,cggtagcgtcccatgccgctgaggggggcgcacgggcatgggcatgggcgCggcgggtgcagccaaacgcacggggaccggcatcgtggtgtgtggagggg
3917467_1al_703	chr1A	311.432	G/A	3917467_1al_703,gatcggggatccgtgtagcatttgggttagtcttcttttattttggttccGtagttggaccttgattgtatctggttgatgtaatgctttattcatgtaat
3955448_1al_1452	chr1A	308.745	C/T	3955448_1al_1452,tttagttgatgcccaaggcaaatacagctgtagtacttgcgtcaaaccgcCtccatcttgcactgcatcagggcctccatctctgctggcgggtcttgcta
3898773_1al_2678	chr5B	381.021	A/G	3898773_1al_2678,cttagagaagcactggcctggggtgggggttaaaataaagataaccctcgAgttaattactcccaagggaaaagttataggttgttaggaaaatgtaaaac
3942879_1al_1188	chr1A	314.343	A/G	3942879_1al_1188,atgccaaaaggaaagaggccactggtcaacgtgcactgacacggaccaggAacgagaagaaaaaactgcaggacaccaacacctagcttggcgaagagctg
3883312_1al_813	chr2A	322.904	T/C	3883312_1al_813,cacacaatacataattatagcattacatcatccagaatacaatcaaggtcTgactacggaaccaaataaagaaagacaaccctaatacaatagatccctga
3767996_1al_2203	chr1A	316.635	A/G	3767996_1al_2203,gcccacgcggaggggagtacgagggttgactgcttcggctgcagtttgagActgccatcttcggagaataataggggttgtgggtgcatagagggaaggcc
3974170_1al_293	chr1A	315.085	C/T	3974170_1al_293,gacgatgtacctatcatgtcgctctccctgctcctactttctttgacatcCaggcaaaagggagatatgttataaccagggaggaggcgaacgagtacaag
3871107_1al_597	chr1A	316.569	A/G	3871107_1al_597,atgattaaaccgttggttttgcttgatggcgcgatccaacgaaacaaaacAttggtttctcgctgtttccattttttctctggaaaaatggaaactttcca
3871107_1al_72	chr1A	316.57	A/C	3871107_1al_72,caatcatatttgtccaactggcacattatttacgttgttaattatatatgAagcaatattaacgtacaacatctcttgtttgtgggcgtccggaccgctac
3973120_1al_293	chr1A	317.509	A/T	3973120_1al_293,agggaaatacttacgctactttactgcatcaccctttcctcttcaagggaAaaccaacgcagtgctcaagaggtagcagcaggctgctgcaggcttcggtc
3921003_1al_383	chr1A	317.821	G/A	3921003_1al_383,acaacgacggcgagggcgtgtatggtatatcgtcggttaaaaaagagagaGaaaaaactctggtttgtggaatagtgcaactccgtggtgcgagtggatcc
3907443_1al_1870	chr1A	317.382	G/A	3907443_1al_1870,ctccacctcactaccttctcctacccataagcttaaaaagtcttgatctcGcgggtgtgtgattgctgagtccccgtgactcacggatacttccaaacagt
3948116_1al_3813	chr5D	231.835	C/G	3948116_1al_3813,gattcaaaatgggatatttttttaacctggcaattgctccgcacacggttCaactaaatgagtgtgtgcgatccacatcggacagcatacgtcaatcatag
3945891_1al_2725	chr1A	334.746	C/A	3945891_1al_2725,ggttttacgcctcacggcggcccgaacctgggtaaaattgcatgtgtgatCtctaccatgccgccccacgctcgtttgctctttgtgcaatgtgacgtccc
IWA4302	chr1A	320.223	A/G	IWA4302,CCCTGCTCAGCCTCACCGGAACTAAGCTAGGGCACCACATTTCAGCGGCGATGTGCATAATCTTGGGCTGCCGGTTGTGTTGTGTGGGGTTGTATGTGTC[A/G]TAGGTTTGATAGTCCTTGTGTTCTTCGTTTTTTTGACGAGTAGAAGTAGTAGACAAATACCGAGTCATATTAGCGTGCAGTATCAGTGGAATGTACAATG
3939213_1al_3048	chr1A	318.758	C/T	3939213_1al_3048,gtgcccaattacacaaccgacctgcagcccggagcatggattgaaagttaCgagatggacatggagttattagaggtcagtgacacaacaatggccaaata
3927787_1al_2094	chr1A	318.593	C/T	3927787_1al_2094,gttggtctgctgagcatgtgctgcagctgggtctcccctcgctgcttcagCggccggcatctgaaccggtggtgtgccatcagtagttgtaggcctttcca
3939178_1al_9799	chr1D	269.505	C/T	3939178_1al_9799,acgaagagcaaatctggcttgatccattttgtgctttcgagtgctacttcCgtgagaaagacaacaagggcgataggaagagcaagggcaaggtcagccgt
3881592_1al_184	chr7A	161.314	G/T	3881592_1al_184,ctacaagcatggaaattaaagctggctaaaagctacaactattttttttgGtttttcttaaagtttatttaacacacaagaagaaagcataaaaaggaaat
3848612_1al_535	chr1A	336.47	C/T	3848612_1al_535,ttgtatcaggtgtgacagttgcccctccatgagctgcagcatcgtcggtcCagcatggtgccgccgggtagcgatggcgcaacacattgtaatcttcccag
3894047_1al_7004	chr3A	723.389	G/A	3894047_1al_7004,tcttcgtcttcctcctctcgcaactccactgcagctcgagccccgccgccGtcgcagagcatctcgtcatcgtcgactttggccgctgcatcgatcagaat
3882534_1al_4556	chr1A	338.243	G/C	3882534_1al_4556,tagaaatataaaaaaagtaattaagaaaaagaaaatgtgacgaacattacGtgggtcggcccatttaccaagcataggaggagagcgcctgcttcgtatca
IWA3499	chr1A	337.012	A/G	IWA3499,acccatcttgcacttccagtaatcatgataaatggttcggttcgccatcgttgtaaagtatcgccctgagcaaaggagtataaccgccagacatagtatg[T/C]GTGCTCTTGCGATTTAAGATCAAACAAGAAGTTAAATAAAGAATTCCCTCGTCCTCTTTCCATTATAGCTTGTTCGAAAGCACATCCACCATCAAGTACA
3875864_1al_990	chr1A	338.451	T/C	3875864_1al_990,caagtctcaggggctactgatacatataaatcgttagatttacttacccgTacattctttacatactgatccgtggctctggctagaccatcttgagcaac
3895363_1al_1924	chr1A	339.351	G/A	3895363_1al_1924,cttattatgcgaaaaataattattccttcacctgacagcagggacccaccGgacgggccaccgtatttcgcgaaaaaaaacatttccccctgactgctggg
3886798_1al_2520	chr1A	341.181	T/C	3886798_1al_2520,ctttctaaaaaaaacagctcgcagaaaatcacaaccatttatggtgcaggTcagaatcttttagttttggagatggatctattgtcccctcgcatgaatct
3870310_1al_2554	chr1A	342.972	A/G	3870310_1al_2554,cagtatttcggagctcttcatcaggaatctgcagcctctcgatcacctctAgggagatcaagttcaagccggccccactgtcaactattattttcgtgact
3969524_1al_4248	chr1A	339.517	T/C	3969524_1al_4248,acgctacaggcgctggatcgttaacgggcgcctgcagcgctgtacaggagTtcccgcatttcctatccggcgccttaagcgcccgtnnnnnnnnnnnnnnn
IWB9780	chr5B	18.1388	A/C	IWB9780,TTCTAAGCTCCGATCTGTGTGCCAGGGAGGCGAGATCAGTGGCGGCGGCA[T/G]GATCTGTGGTATTGGGAAGGGTTGCTGAGCCTTCAGTGGTAAATTCCGTA
3895247_1al_14053	chr1A	348.342	G/A	3895247_1al_14053,gctcgatgctaagtttccattaattgatggcgttttatgaacacgccactGtttcccgccatttcctcacctgtttcccaccaccctgctatattgcgcat
3926543_1al_6509	chr1A	345.801	C/A	3926543_1al_6509,ttctcatcaatgaattcccaatcaacccacttcatgtcacaaactataggCttcttgtccagcagaatggtctcatagaagtcttattgttctttggtgtg
IWB22559	chr3A	449.511	T/C	IWB22559,TGGCATCTCTTGTAGTTTCCTGGTGCTGTTATGGGCTAACCAAAACAGAG[T/C]AGTAGTGAGACCTGCATCTGGCCCCCAAGAGAAGCACCACCAATAGCTTG
3870019_1al_2260	chr1A	347.006	A/G	3870019_1al_2260,agcggcgaaggagtcttggcagacgcgggcctggctgcagccccgcagacAtcctcagcaagggtcttaccgagggcccggaaagggtcttgccgtggcac
3973147_1al_654	chr1A	347.914	A/G	3973147_1al_654,tcactgagaaataaaaatgcttgttacaaaaaaatactcagcattaacatAatatcattcatggagtttacatatttagaacatctagccgttgagccccc
3909515_1al_1563	chr1A	350.725	T/C	3909515_1al_1563,gagagttgaggtagctcgcctccaagctgcagcccatgatgcaatgactgTtgcatcgcagtacaaccccaactattactatggatatccgccaggcaaac
3921177_1al_286	chr1A	346.31	T/C	3921177_1al_286,cagaagagtacgagaggagagcggaggcagcccgactccacgctgcagctTagcaggtgataaccgctgcacatctgtatgatcccaactatccttactca
3916967_1al_95	chr1A	343.237	C/T	3916967_1al_95,aacacacaagaagaaaacaggaaaaataaaataaacaagcatgggtattaCagtgaaaaagtatgagcaccgatatctagcaatgagtgtgcgtgaacata
3973370_1al_604	chr5D	377.183	G/C	3973370_1al_604,cgacccgggccagggcgacctcgcggcacagacggcagctcgagcgctctGggtgtttgtagccgccgtcgcagtagcagctgcagctgtctcggctgctg
3869309_1al_1727	chr1A	347.946	G/A	3869309_1al_1727,tagccggagttgtggcgatgtcgtagtttgcgtgatactccctccgttccGtttcaaaatatagtgtgttcacgtttcctgaggttcaattttgaccataa
3871937_1al_2041	chr1A	347.773	G/A	3871937_1al_2041,atgaacacgccactgtttcccgccatttcctcacctgtttcccacaacccGgcgatattgcgcataaatctaggcggcgcgcggcgcacggaggcgacaag
IWB30957	chr1A	353.255	T/C	IWB30957,AGAAGATTGTCACGATTCATCTGATGCTTCACTGGTCTTGAGTCCAAGTT[T/C]ggccgacagtgtatcacaggacatgaatcttgaggcatctccagcattgg
3979444_1al_3127	chr1A	353.391	G/A	3979444_1al_3127,ccgccctgggtccagatcccgctctgtctctggcattcatcagtctgcgcGatagtaccgtgatggtgggcggtttaccgctgcccacagcagtagtaccg
IWB19762	chr6B	400.731	T/C	IWB19762,GGGCTTAGTTCTGCCCCGAGCCGATCTCCGTGACGTATCCAAAGAGCATA[T/C]GTGAGAAGATTAGATTTGAAATTGAATACTTAGATTTTTTTTGAATCCAA
IWB13492	chr1A	354.824	A/G	IWB13492,CTTATCTGATCTCTGCAAGTGTTGGGAGCTTTTGTGATTCATCCATGGTC[A/G]CACGTTCACGTTCCTTCCCACTCAAGTTCCATATGCTGTCGATGTGCAAG
3938589_1al_5407	chr1A	353.913	G/T	3938589_1al_5407,taatgtgttcctgtcaccgtcactgtcaggggcacgggcgatgacctgatGttagtgctcgtgcgatgacaccacgcgtggctcatgatcatcggcacttg
IWB70699	chr1A	351.883	A/C	IWB70699,CTTGCAGTTGCAGTCTACACACACTCACCTAAATCTCAACAACAAGAAAC[A/C]tattctgttattcattcatgtaattcatgttcagttacatcttgacttga
3951617_1al_790	chr1A	352.759	C/T	3951617_1al_790,ggttgtactgagatgcagcagtcatcgcatcgtgggctgcagcttggaggCgagctatcttagccctcctcttatactcttccgcctcctctctggttata
IWB30269	chr1A	355.322	T/C	IWB30269,GAATGGAGAGAGCGCTATCGAATAATCAGGGGAATATGTGAAGGCTTATG[T/C]TACCTTCATGAGAAGCGCATTCTTCATTTGGACCTTAAGCCTGCTAATGT
IWA6657	chr1A	354.95	T/G	IWA6657,AGCTTCTCACATGCTGCTGCTGCTGCTGCTGCTGATGCTCCGATTTGTCGATTCTCACCTCTATGGTGGCCTCCTCTTTCTGATCCTCCTGCTCAAACAT[T/G]TGGAAGATGGGGTGCAGGTATGCATTTGCCAGGTAGGTCTTGAGGTTCAGGCTCGGCTCCGACGCGTGCTCCATCCTGTCCTTCTCCATCGCTTCCTCTA
IWB31366	chr1A	354.95	T/C	IWB31366,AGCACCAGTATGAGTACCAGCACGAGGAAACTCACATGAGGAGTGAGCAG[T/C]CGCCGCCACACTTTGTCTACCACCCTGGAGTGGAGCATTGATGCTGCGAA
IWB25391	chr1A	355.324	A/C	IWB25391,GTGTCAACTTGTCATCGAGAAATATGTTGATCGGTCTGACATCACCATGT[A/C]GCATGGGGTAATTTGCGTAGGAGTGCATGTATCTTAACCCTTCTGCAGAC
IWB14647	chr1D	285.055	T/C	IWB14647,CGACGGCGTGATCGACGAAGACAGCATCATGCCACTTGAGCCGGTTCCGG[A/G]GAGGGTGAAGCCTAAGTACAACTACGAGGAAATGTACAAGGACCCTCAGA
3950803_1al_418	chr1A	355.882	T/G	3950803_1al_418,aacaccatggtaattctgctgaaaacagcgtcagtttgggttagttccatTcaaatcatgcaagttagagtccgaaacaagggcaaaagtgtttggaaaag
IWB30530	chr7D	568.318	A/G	IWB30530,TGCATTTGCCTTGGGATTTGTCTTGGTACAGGCTGGCCTCCTGGAGGTCC[A/G]ttccctgatggcggttgagttggttgaaggcttgttgttccttcaaaatc
3916902_1al_4156	chr1A	356.441	C/G	3916902_1al_4156,ttacctagttattactcagttaattatggagaaccaagcaaaaactatcaCaaccgctgagcggcacacataagatccccacacacaacttcaaagagggt
3965786_1al_1369	chr1A	356.758	C/T	3965786_1al_1369,tcttcttgtgtgccttaataaaccttaagaaaaaccaaaaaaaaaatagtCgtagcttttagttagtttactttccatgcctgtagtagtagtaattaaaa
3938906_1al_73	chr1A	357.03	C/T	3938906_1al_73,tgccttacctataagcttaaatagtcttgatcgcgagggtgcgagattgcCaagtccgtgtgactcacagtttacttccaaaccagatgcagggcctgatg
3944632_1al_4977	chr4A	182.138	G/A	3944632_1al_4977,acacaattacatgaataaagcattacatcacctagatacaaacaaggtccGgctacggaaccaaaataaagaagagtaccccaaatgctacacagatcccc
3888283_1al_6319	chr1A	357.788	G/A	3888283_1al_6319,tggtgcacgttggaagcttccattgcatgcgatcaagcagtgatcagaccGaggcgaaggatgaccggctcgtgaagtctctgcagcaagagtccgcacga
IWA498	chr1A	357.416	T/C	IWA498,CTTGGTGCGCTCCGTGAGGAAGGGCGAGATCATCGAGAACAGCACGGAGAAGTACCACGG[T/C]ACGTTCACGAACACCTGCTCGGTGCCAAACGCGAGTGYGGGCGACGGTGTGAGGTAAATG
3966094_1al_1309	chr1A	357.648	A/G	3966094_1al_1309,cggagctgttcccgctacgccattgttcaccgcctcggatctgcttccccAtcgccgacagacggccaccgcaccacactcaacaacttggccatggtttc
3966094_1al_942	chr3B	304.193	G/T	3966094_1al_942,tttcaaacaagcgcgtctcaaaccgaaacattgtacccccttagttccccGccttcctctgtttccccattcatactccgtgggcgcgaaaacgccctctc
3934513_1al_2907	chr1A	359.865	C/T	3934513_1al_2907,actagcagcctcatggtgggagaattacactgtcacctaccctatagccaCggtgacatgtgatcagttttaacaagctttccgttcagcccatgtctcaa
3976560_1al_4530	chr3B	656.601	A/G	3976560_1al_4530,ctgagaccaaacgcttcaaagatatacagctagccagttcagccagagagAttcctcgttttaacgcagcacaacatattaagaataaaaccgagtgcata
3944816_1al_8842	chr1A	358.771	G/A	3944816_1al_8842,agagaaggaagagcggcctctcaaaggttatggtgtggtgtgtgacatttGtgggagagacggagacaaaagtcagagcgagctagcaggctgcaggcctg
3943651_1al_2510	chr1A	359.973	C/G	3943651_1al_2510,aggaggccatttaggagagtgaagaatcaaaacattcctccgccgcctggCtgctcacctcaaagttcatctgttcaaattcctggtgtatgcctcttcgt
3980153_1al_1001	chr1A	361.065	C/T	3980153_1al_1001,tatgtagagatggtgaaggaaactacttgggcagctctgccttggtgattCcagaggtcgcggatgcagcaatattggaagctattgcctgtcgggaggcg
3873607_1al_5537	chr1A	362.797	G/T	3873607_1al_5537,cacagaaggatgacaaagaaattgctgaaataaaggagaaaatgagcaaaGgaaaaaccaaaggttttcatgaagatgagcacgtcaccttgtggtttgag
IWB60796	chr1A	362.629	T/C	IWB60796,GACATGCATCCACATCACAAGGGCCATCAGAATAAAAAATGACTGGTGAA[T/C]CAAATTCAGAGCAAGGAGCAAGGATTGACCATTACCGCCGACTTCTACAT
3873622_1al_2824	chr1A	361.271	T/C	3873622_1al_2824,gcatgacttaaatttgaaaaatatggaagttataccatcaccaaatgctaTgacttacctatgccggagccgaagaggaagcggccatcagaggggcagga
IWB22518	chr1A	361.512	A/G	IWB22518,TCCTGTGACAAACGTGGTGCTCCTGAAGGGTTTAGAGGACATGTTGAGCG[A/G]CATCCCGGGCAGCACTATCATAGCAGAACTGATCAAGAACCCTTGTGCAG
3912138_1al_6284	chr1A	363.365	C/T	3912138_1al_6284,ccctatcggtctctggtctggtgattccgctctctcctgcagtcgtcggcCcggcggcacacgcagctgcctcgtggcgtgcactccgccgatcgtgtcca
IWB709	chr1A	362.863	T/C	IWB709,TGGTGATGCTCTGGGCGCCCAACGTCTATGTGTTGCTCTTGGCCAGGCTC[A/G]TCGACGGGTTCGGTATCGGTTTGGCTGTCACCCTTGTCCCTCTTTACATT
3976223_1al_3538	chr7D	181.613	C/T	3976223_1al_3538,tcaacatacccgatctgtcccaaggccatgacacaaaatcatccatttgaCgcagagatgtccagatcttctgtatcgcctctacatcagcctgccagaag
3917917_1al_771	chr1A	364.628	G/A	3917917_1al_771,tcctcacgtgtttcctgccaccttgctatattacgcatagggggcacgcgGcgcacggaggcgacaagcgtagcctgtagcacatccaccttttccaagca
3917917_1al_992	chr6D	242.643	C/T	3917917_1al_992,catcatcgccagggttgagcagacctttggcgcatgtcgcttgagcaccgCagatcaagataggcatgtcagcgccgacaggctgcagctcgccgcacaac
IWB66112	chr1A	364.634	T/C	IWB66112,GTAGGAGATAACGTCCATCCGAGATCGAGGGAGCTGTATGACATGCTGCA[T/C]GAT
3976654_1al_3742	chr1A	364.653	T/G	3976654_1al_3742,cgaagtggacatgcgaaccgcagcgtcaactgacccgccgcagtccacagTgccgccagcacaggacgccacgctgcagcgcatgcagcaggccgatatgg
3897545_1al_799	chr1A	365.386	G/A	3897545_1al_799,ggatcgaacctggtttggatccaatcaattctcctgtgaaagatgaaactGccatgaatctgctctgactggaatcccgcgttgacggtgtcgtggactac
3922087_1al_509	chr1A	365.604	C/G	3922087_1al_509,tgcaggtaggatgatgacgtcagagagaagatcagggcggaggtgtaggtCaaggttgtgcccgctcaggtgccgacctcgaacttcacgacgcgtggcgg
3874277_1al_8644	chr1A	366.232	C/T	3874277_1al_8644,ggtcctagcgacaacggcgctgctaccggttgagctagccagatttactgCcgataatccacttctgaacttaggcttatctgcagtaatttcatctaaaa
3970389_1al_10029	chr1A	367.009	C/T	3970389_1al_10029,agcgcctgcaggtggtgccggtgaacggtgtccagcagcgctgcctcgagCgggctcggctccgcccgggggtgacgcctcggcggcccctccgtgccggc
3962270_1al_1281	chr1A	366.3	C/T	3962270_1al_1281,cgacgaccgaggaccaactcgcctcaggtccaatttttacgtcggcttacCctagacagcgattttaggcgccccctgaaaggccaacggctggagatgcc
3964452_1al_681	chr1A	370.436	C/T	3964452_1al_681,gctcgtagacgcacgcacgtgggtgtgaggcgttgggctataactgaactCgagtgaggcgttcgtctactgaacccgagcgattgcactgcaggctacgc
IWB72896	chr1A	370.097	T/C	IWB72896,GCGCAATCTTATGCGCCAGCATCTACAGATGCACACTGGGACGCCACTTA[A/G]GCAGGGCCTACAAAACTGACTGAAGATACACAAGACCTTGCAACCCCATC
3942188_1al_9980	chr1A	369.503	A/G	3942188_1al_9980,agggagaacgagcgtcggtgcaacatttgagaaaggaaaaaggaagcgtcAgtctgcttatcccagctcaagcagcatacaccacaatttcgttcgaaaca
IWB71889	chr5D	367.435	A/G	IWB71889,CCTAGGATTTTGGCTCTTCTCAAGAACAAATAAATTTTTACCTTGGTACT[A/G]AAGTGACCTAATTCAAATTCATTTCAGTGAGAAAAACTATAGTGGAAGCA
3900873_1al_350	chr3A	602.746	G/A	3900873_1al_350,ccaagcttatgcttttggcctaagtggtctaatgccatggatggcctagcGgatatccaaagttgtagttggcatcgtactgagatgcagcagtcattcca
IWB12529	chr1A	372.316	A/C	IWB12529,GTGCGCCAACGTTCTCGGCGGACTGCTCGGCCTCAAGATCGGTGTTCCGG[A/C]GCACGACCAATGCTGCCCGCTGCTCCAGGGGTTGGCCGACCTGGACGCCG
3946769_1al_9003	chr1A	373.323	A/G	3946769_1al_9003,tgcatgatggaccggaccaagaatatcacctccttcaagtactagcaaaaAggctcgtgcgttgcaatgtgagaaaataattcataatcttcaatggccat
IWB35883	chr1A	375.469	T/C	IWB35883,CGGGGGCCCAGCCGCTGCTCTGTGATACGAGACGGGAATGGGCTGGCCGGTGGCGTATGG[T/C]GGCAGGGCACGCATATGCCGTGCTGCAAAAGGCRGGTGGGTTGGGCCCGAGTAATAAAGC
IWB65452	chr1A	374.217	A/G	IWB65452,TGG[T/C]CTTGCCAATCTGGTGAcGGCTATGATCGtTaTGTACATTAGCAGCTCCAT
3937389_1al_3900	chr1A	374.961	G/T	3937389_1al_3900,caccatgaacatgcaacatgcactcggcttacgccagacacgtggctgaaGgcgatcgttccgggatggaaaattaagctgagtggtacactcggcttacg
3974907_1al_6049	chr1A	370.785	C/A	3974907_1al_6049,tgcaagacaacaatgaactgcaggatggtaagtaagaaccctgcagccttCtttttactgcccgcaatgagttgtgttagatgacaatatctgtatctttt
3896489_1al_9219	chr1A	374.168	A/G	3896489_1al_9219,cgtactgaacttctttcactttttggaccgattcgatcgatctttctcacAcaatactcctttgcttttctaagtgccattcgtcgactagttgcactata
3973439_1al_114	chr1A	375.893	G/A	3973439_1al_114,acggcgtaagtcaattgcctgttcgctggtggtgatgaccatagtggaccGttgtaaacggataacaaacggacgaactgatggtgctgcaaaactgatga
3978229_1al_212	chr1A	375.714	T/C	3978229_1al_212,caaacggagctccctaagatcttctaccaactcctttggcattcctccgcTtacgagggtgttgacgtaagtcttccggctcaaagcgtctgctacgacat
IWB40764	chr1A	372.64	T/C	IWB40764,TACGAAACAGTTCATCAGCGTGTAACTGCTGTTCTGAAGGATTACCCTTG[T/C]cttaggcttacccatgggaggaaggttcttgaagttcgccctgtcattga
IWB35410	chr1A	376.67	A/G	IWB35410,CATAGATTCTTGATCCCTGTGCATCAATTAATAGAGCTTGTTCATAGATACAGATCTCTGTTGAGATGGTATAGTTGACAAACATTCATATGTGCATGTC[A/G]ATAAAGAAAATATTAATTGATGAATTTTCCTAATACGTTTTCATAGGCAGTTATCCAATATTGTGCTTAGATTACATTTCATATATCTTGTGGAATGAGC
3881720_1al_1214	chr1A	379.085	C/T	3881720_1al_1214,tctccagattcatctgcaatatctattattagatctgcagctatgccgcaCgctatatggtacctaccattctttgaaagaaatgttaccagctggggcct
3956502_1al_2685	chr3D	151.915	G/A	3956502_1al_2685,tgtgagaaggtgtacaaataaagaaaatatataattgatcgatgttgttcGtaggcatggctccatttcttggggacaatgttcattggttggcagctagt
3933129_1al_1245	chr1A	376.756	G/A	3933129_1al_1245,aactaaaatacatctagatacatccatacctgcgacaagtaattcggaacGgagggagtagaacctaagcattttgttcaatccctttgagcgtttgtctg
3898610_1al_5529	chr1A	379.584	C/A	3898610_1al_5529,taattgatggcgttttatgaacacgccaccatttcccaccatttcctcacCtgtttcccgccaccctactatattgtgcatagggggcgcgtgatgcacgg
3916130_1al_8063	chr1A	380.651	C/G	3916130_1al_8063,tagtttggtctccttgtgatattcttctattgttattttctttccatcatCtacctgggaagtgcccaacctactagacatgcctaggctgcccataacgc
3971652_1al_814	chr2D	268.634	G/A	3971652_1al_814,ggtagttgtcgcgttggccgaaggtgacgggaaggtggatctgccctatcGgggtggtggagcagtggtcactcctgagaagggcttggtgggctgcagct
IWB8273	chr1A	381.822	T/C	IWB8273,ATCGCAGCTCATGCAGGTGCAGCCGCGTAGCTGTTTCGTACATACGGTCT[A/G]GAGTACGGTTTGCTGAAACAAGAATAAGGCCACGAAGCGTATTATTATAC
IWB56573	chr1A	382.23	T/C	IWB56573,CGCGATTTCTCATCGAAATCATCGTGGTTGATGATGTCACCTTGATAGGA[T/C]GGCAGCGTCACTCCATCTCTAGTCTCGATTGGGTTCGATCTTGGCTTTGC
3960755_1al_5223	chr3B	69.789	C/T	3960755_1al_5223,ctcaatttccacatctgttattggtgccaccagcttcaaattcatgtcctCtgtaaccgcagcagcgatgttttctagcagtccttgagcacttgtagatc
3880223_1al_663	chr1A	382.575	G/A	3880223_1al_663,tctttgataggaaggaaatgagccactttagtgagtttgtcgatgacaacGaatatagcatcattgccacgcttggactttggaaacccagtcacgaagtc
IWB42121	chr1A	381.274	T/G	IWB42121,ATCTTATTATGTGGTCTGAGTGACAGAAGAAATGGCAAATCCCTCACACA[T/G]GGAACAATTCAAAGGGGGCAAACACTTTAATTCGAATATGAGCATCAAAT
3976538_1al_4394	chr1A	381.152	C/T	3976538_1al_4394,agtagccgcttggagtagacatgaagtggatctatagctaagatgagtatCtatacatagtcatgtggcttgatacgtcttcaacgtatctataatttttg
3960343_1al_8593	chr1A	381.274	A/G	3960343_1al_8593,tgagcctcttgtgcgtgcgtgcgctagtggacataaatggtccaagacctAaaggtgcaagcgaacaaagccaatgggctgctgctgcctacctgcttgct
IWA4576	chr1A	382.74	T/C	IWA4576,GAGGCTTGAATGAAGTACAATATGCCACCAAGAGAGTACTTAGGTCAAGTAGTATCTCCAAAGTGGAATCTGTCAATTCTACGGAAACTGGTGAATGTGC[T/C]GGAGATACAGTGCAACGCACAACTGGAAGTTCCATTGCATTGTCAGATGGTAAAACTAAGATCAGTGATAATTTGGCGGCTGTCAATGCTAGTAAAACTG
IWB31887	chr1D	308.27	A/G	IWB31887,TCGAACGTATTTTTAAAACACCAAGTACAGAGCAGACGTCGCCTTAAGAG[A/G]CGAGTTTCAAGATTGACTAGGTCACAATTTGCACCTCCAGCGAGATATAC
3924259_1al_6046	chr1A	387.52	G/A	3924259_1al_6046,aagttgactgctacgtgtacaaaggtaaatggatatcgtctcaaattgctGaccttacttgctgaatatgtatatatttactattttcttgcccactctct
3918158_1al_248	chr1A	385.03	C/T	3918158_1al_248,cagctccacctcatacctttaccgtactcataagcttaaatagtcctgatCgagagggtgtgagattgctgagtccccgtgactcacagatacttccaaaa
IWA5268	chr1A	385.899	T/C	IWA5268,AGTTCTCAATCCCGGGAGGTCGACATGCAACACACCATGCGGACCTTCTGCAAAATGTTGGAGCGGCTCGGGTCTTGCGTGCAGCGGCGGCAGCAACATC[A/G]GCTTCCATTGAGGCCAAAGTGTTCGCCAGAATTGTCCTTAGGAATCTGGAACACCATCAGGCAGGGACTTCAACCTGAAAACGCAATGGCGAGCACAAGC
3877521_1al_1133	chr1A	389.162	G/T	3877521_1al_1133,tttaaaatgattacggtttaggcttgaacaaatgcggaataaacctagcaGttaatttttcaagcacaaaacatacaacaagactagcgtcacctatgtgc
3980211_1al_12191	chr1A	387.998	G/A	3980211_1al_12191,aaattcacatactattaccatcctcttagaaataaaaatgtcatgccaacGataataaaatgccatgctctcaaataataaaactaccatcctcctaaaat
3877521_1al_1097	chr1A	389.162	G/A	3877521_1al_1097,atcgtggatgtcgcctagaggggggtgaaaaggcgttttaaaatgattacGgtttaggcttgaacaaatgcggaataaacctagcagttaatttttcaagc
IWB31781	chr1B	418.672	T/C	IWB31781,TTTCTTTTTAAGATTAACTGTGGTCTGTAGTCTGTCCAATGTACCCTGTG[T/C]TGTAAGTTATGTTATGTATGGATGCATCTGTTGTTTGTATGGCACATGAT
3918701_1al_637	chr1A	390.341	G/A	3918701_1al_637,cattttcttgcctcccttgtctggctgtcgttgttggatacggtagtactGctcctgggtcaacggtagtaccgtacgcatccgcgggagtaccgcgcggt
3870735_1al_1330	chr1A	389.384	C/G	3870735_1al_1330,catcggcacctgcaaactggttttggaagtatctgtgagctacggggactCagcaatcttgcaccctcgcgatcaagactatttaagcttatgggtaaggt
3932027_1al_2176	chr1A	389.638	T/C	3932027_1al_2176,catcctctactatgagaggttccgtcggatgggattgactgataagagtcTtaagcagtcaaatactgtttttcacggtgttgtgcctggcaagtcagcat
IWB31924	chr1D	310.247	T/C	IWB31924,TTAGGAACAATCAAATTATGATGACATCAATTTCAGTTCAGATATGTTGT[A/G]GCTGCTCCACTCAGTTGATTGGAAGCATTCATTATGTACAAACTATGGTA
3977707_1al_5771	chr1A	392.527	A/G	3977707_1al_5771,ctgcagctcgcagaaacaccatgcagaagagacatcagcagcagcatagcAtgcatgcaagtacgcaacacaaacgagtagaatacaataataagtttagc
3955859_1al_388	chr1A	392.03	A/G	3955859_1al_388,gagtacgagagaagagaggaggatgctcatcgccacgctgcagctcagcaAgcgatagttgctgcatcatagtacgaccccaacaactattattatggata
3875170_1al_1023	chr1A	391.202	A/G	3875170_1al_1023,tgcagcacgccgggtgctgcagcctggccacgggggcggaggtcgatgccAtccctccgggcagcatcttcatgacccgaggatggggcgaggttgcccgc
3888383_1al_968	chr1A	392.29	A/G	3888383_1al_968,gtttgtagtatatttactcggctctggatggaccttgtcgagtgaattccAatccagtgggggcacgctaagtgcacccactgggtgtagtccccgagacc
3976436_1al_5274	chr1A	392.044	C/T	3976436_1al_5274,tgcaggatccttgggacggtggggttagagttcttgtcatgcgtacgcgaCagtgggatttagtgtcaggttcttgaggtcgactcaagctgtgatttcga
IWB31350	chr1A	392.529	A/G	IWB31350,AGACCTCATTGCCAAATTATTGAGCAACATGACGCAGCCTGGGGCCTCTG[T/C]GCCACTAAAGCAAGCAACTCTAGAAGCATTGGGGTATGTGTGTGAGGAGA
3928641_1al_1202	chr2D	274.023	C/T	3928641_1al_1202,aatcatggagcccaaataaattattacacaacatattgccccccgaatgtCaggcagatttaacgcctccacgaggcacgtctcatgtcacaggaaatctc
3871936_1al_1308	chr2D	372.997	G/A	3871936_1al_1308,cgagggccccccttgagctttggctgcagcacgccgactgcgacgccccgGcgactggagtggaggttgaagccgtctcctatgggaggatcttcatgact
IWB61236	chr1A	394.26	T/C	IWB61236,GGCAGCCCTGATGGGCATGGATACTTCAATGGATCACGCGGGTCATATTC[A/G]TCTGCTTCATTGGAAAGGTCAGGAAGCTTTCGTGAAGGTGGTGATAGTTA
3977271_1al_17152	chr1A	394.321	T/A	3977271_1al_17152,agaaaccttcaagatcttacccttgtccgtttttggtccgttctctggagTtgcacccttcttatctccatgtgcctaaaaggagaagtaatcaagttgtg
IWB50545	chr1A	394.853	T/G	IWB50545,AGACGCACAAGGCGAAGAAGGCTTCGGACACGCCAAAGACTCATGAGGGC[T/G]CCCCGAAGGCGCCCGACGTTTGAAACCCACCCCGGTGTTCCGTGTTTTGA
3920586_1al_9412	chr1A	399.232	C/G	3920586_1al_9412,aagtcaccaatgattgcgacgagacgtggaacagagcatcaacatgcagcCagcggattatgaaacacagagcaaagcaggcgatggatggaagatggaac
3943437_1al_4807	chr1A	399.477	C/G	3943437_1al_4807,gttccttccggtgatttggattgctcattaactatggatgaaccaacgtgCgtggctatatcatatgtgtcatgatcccgtcacaagggagtggctaatca
3951657_1al_15780	chr1A	403.655	T/C	3951657_1al_15780,caggtgaaggaacttatattatgggacgaagggaataggttggttttgagTgttggtgagtgcggtctttttcttctgcagctgctgccgtgtaatgtgtt
3911531_1al_4809	chr1A	402.29	G/T	3911531_1al_4809,ccactgatgtcggcgcttggactatgtttcagaaggtttatactcagcggGatcttccttgtcctcgttgttgttctcctttggtgcatccaccatgtata
3975933_1al_3664	chr1A	411.662	C/T	3975933_1al_3664,tcctcctgaggtcctgcgcggcgcggctgcttcttcttggggatggcctcCggagggccctcacttctgctgtcagggtcatcgattgctgcagcttggaa
3908649_1al_6432	chr1A	422.489	G/A	3908649_1al_6432,atactaggctgtcacaggagctggaggaatgcaagacccaactgcgggccGctgttgccgtgttgaaggaaccgaaaaagtctccgctggtaacatttacc
3930957_1al_1985	chr4D	241.817	G/A	3930957_1al_1985,cgctcggtgaggtgggggtcggcgagggagagagagggggggagtgagagGggtcgagtggttcgggacgacgtcggggcgttcacccacgcgtccggagg
IWB64464	chr1A	425.265	A/G	IWB64464,GACCACGTGAGGGGGTTGATACAGAGGACCAGGAGCCTGACCGAGAAGCC[A/G]TTCGGGGCGGCCATCGTGCTGGCCTTCCCGCACGAGGAGAATCTGAGGGT
IWB2336	chr1A	420.382	T/G	IWB2336,gtcagctctcgtcacagaaaacgccgcaggaaacaatctgaatcaaggca[A/C]GGATCGGCGTGATGTCTTTCCTGAGGCTGTTACCTCAAAGGTTGCCCCAA
IWB26360	chr1A	445.884	A/C	IWB26360,AGGGAATAGTTGCTCAATGGTCTGATGTGTGATGGTAAACAATCCACACC[A/C]TCTATAGACTGAGGCATGATGGTGGATGCATTTGTTCCATTTGGTGTAGA
3890223_1al_2922	chr1A	448.019	G/A	3890223_1al_2922,atgtgaagcggtagcaatcagatcgtccctgctgcctcgggacttgaagcGaacccaactgacgaaaacaagctgcagcaacgcacggctcggcggatctg
IWB44419	chr1A	459.515	A/G	IWB44419,agatcgaaggagcgaagaaatttattgtaccggcagcgcaaggttcgcaa[T/C]GAGGAGAGAATGAAGAGGAGAAGGATAGCTGCTGCCGCCAAGTCACGAGA
IWB75207	chr1A	458.908	A/G	IWB75207,TCAACAACAACCACGTTTGCACCTTGATCATGCGTCGGATCATCTTCGTC[A/G]TCATCAATGTTGATTACTTCGGCTGGGATGCGAGCGGCATTGCCTTCAGC
3887581_1al_13986	chr1A	455.613	C/T	3887581_1al_13986,ctttgtagactacaacctcttgatgacgatctctttatagcaacggtgatCagaatggataatttgaagtttcgtcccaggtgaaatcgccaaaaagtgtg
IWB74868	chr1A	458.397	T/C	IWB74868,CCGTAGTAGCTAGGAGTACTAGCTAGCTAGCTACGTGACAGTGTTCTTCT[A/G]TGAGTTAATTCCCAGATTAGGTCTGGAGTACCGTGTGCTCAGTTCAGTGT
3973086_1al_8761	chr1A	462.716	G/A	3973086_1al_8761,gacatcaacaaagatactgcagttgtacttgagaaacgaaactgtcactcGttcacccacatgaagttcattaccaataatggtttctaaaagtccgttga
IWB7022	chr1A	465.132	A/G	IWB7022,CCGCTAGTCGGATCTCCATCGCTCCACGCCTCTCCCTGCAGCTCCAATTC[A/G]CCGGCGTAGCACATCCTCCTCATCTCCCGTTGTTCCAGCACCACTCCTCG
IWB42650	chr1A	462.434	T/C	IWB42650,CTCACTGCCTTGGTGAGGTGAAACAATCGCCAGTGAAGTAACTGAGGCGC[A/G]CTTCTGCAGTTCCTCTGCATACCAATAGGTAAATAGGAAAAACAGAGTTC
IWA4326	chr1A	462.435	T/C	IWA4326,TGTGCGTGTCTGTCTGGTTGTTCTGTTGTTTTCTGCATGGTATGGAGGCCTGTCGCTGATGGTTAGGTTCCATGCCTTATCTTCCTGATAGGATATTGCC[T/C]CCACTAATGTTGCTGTAGTACTTTCCCTAGTCATAGGGATGGGGTTACCGTATTCTCAGTTCAAAATATGTGAACTAGTATGTTATTTGTTGTTTGTCAT
3930685_1al_1358	chr1A	462.897	G/A	3930685_1al_1358,tgaaggtgctgcagccttttctttaggcttcttgtcatggctattagccgGcgcttaaagcgctcttgttcgaggggttcttctggcatgataaaatcgtc
IWA7021	chr1A	462.435	T/G	IWA7021,ATCAGAACCATCTGCTAGTCACTCATCATTCATAATGATAAGAGCTGTGCCATTGAGCCAGTTGGTCTGAAACCACTGAAGATGTTAGCCCTGTTAGCTT[T/G]TGTAGCTTGTTTATGGAGGAACCCCTGAAATTCATGTAGAATTTATCGAGTCATGAAGGACTGCGGTGTATTTGGGGTGTGGAACTCAATGGTTAATATG
IWA4328	chr1A	462.435	A/G	IWA4328,AACTGTGATTTCCTGGTATGGTTTGCTGTTCTTGTTGGCTGTACGAGGGCAAGTTTTGCTACTTGATTTTTCAACCGGTACCATTTGTAATATTCATTGG[T/C]GGTGCATTTGCCGAGTTACAAATGTGTCGGTGACCCGTTTTTACTCTGAGAATTTCACAACATATATCAGAACCATCTGCTAGTCACTCATCATTCATAA
IWA4327	chr1A	462.435	A/G	IWA4327,AAATATGTGAACTAGTATGTTATTTGTTGTTTGTCATGTGAGTTGGATCTGTATTATGTTGGGACATGAATGGGTAAAAAACCCTACAAATCTGCCATCT[A/G]TCTTTAAACTTATCTATAATTGCTTGTTGTTGATGACTTGTTTGCTTGAGCAGTATTTGTATGGCAGCCATGTGCATCCATCCTCACTTTGGATCCAGCA
IWB35308	chr1A	462.435	T/C	IWB35308,ATGACAAACAACAAATAACATACTAGTTCACATATTTGAACTGAGAATACGGTAACCCCACTCCCTATGACTAGGGAAAGTACTACAGCAACATTAGTGG[A/G]GGCAATATCCTATCAGGAAGATAAGGCATGGAACCTAACCATCAGCGACAGGCCTCCATACCATGCAGAAAACAACAGAACAACCAGACAGACACGCACA
IWB65944	chr1D	366.243	T/C	IWB65944,[A/G]CaCAGTCCTTGTGTTCCAGCTTCTAATCTACAAATTGTACATCAGATGtA
IWB35927	chr1A	471.489	A/C	IWB35927,CTTCCTTCGTTGGTTACACCAAGCAAACACCAAACTTGTCAGGCCTAAGGATGTCAAACA[A/C]GTTCAGGGTGTCTGCCACGGCCGTGCACAAGGTGAAGCTCATAGGCCCGGACGGAGAAG
3894725_1al_1206	chr2A	696.162	T/C	3894725_1al_1206,gcagccacaccgcacgctatatggtacctatcattctttgaaacaaatgtTaccagctggggactttttaggttccttcaatgcggaaacggcggcccgaa
IWB31675	chr1D	375.955	T/C	IWB31675,TCATGGGGACAAATGAGATGCACATAATCTTRCCTTTTTCTGCTGT[A/G]CTCAAGAAGCTGGATTTGCAGTACAGTTTTCTCACCACTGAAGATCATTG
IWB21382	chr1A	471.7	T/C	IWB21382,CTCACCACCAGGCAGACGGCCCGGTGCTTCGTCTCCCTCGGAGAGTACCA[T/C]CGCCGCCTCCGCGCCCTCAGCTCCATCTGGGCTTCACGCCCTCGCGAGAA
IWB40349	chr1A	471.698	A/G	IWB40349,TCGTCGAAGACTGCATGCGACACCATGACGAGCTGTTCCACCTGAGGGCC[A/G]TGCTCGCCAGGTCCGACGTCTTCCACCTCATGACCGGCATGTGGGCGACG
IWB44485	chr1A	474.642	T/C	IWB44485,TACGATGTGCTAAATTGTTTACCTTTCAGGAGCATCGGCTGCTGGCACGT[A/G]AGGCTGTTCGAAAGTCTTTGGTACTTCTGAAAAATGGCAAGAAGCAGAAT
3975017_1al_1656	chr1A	475.616	T/G	3975017_1al_1656,aaaacagcagttgctgtagggctctcaacgcttaatactctgttgagatgTcatgttttcgtcagactagacccgctgcaggctttt
3885726_1al_2822	chr1A	474.77	C/T	3885726_1al_2822,cacttcattgatcaacaacgacgttcagggattgttacaggatcatgtggCgcgacatggcggccaacgtttaaagatgagaattttttgtttttatggct
3944691_1al_705	chr1A	475.228	C/A	3944691_1al_705,ccaagcttaggcttttggcctaagttggtctatggccacggccggcctggCggatatcgaaagttgtagttggggtcgtactaagatgcagaggctattgc
3974856_1al_3401	chr1A	475.625	G/A	3974856_1al_3401,tacattgttggcacaaacccggaaaccatacacacaagataacccaactcGggcacgaactcagagcaatgatgacgaatgccgcgcccgcgaaccggcct
3896153_1al_446	chr7A	566.71	C/A	3896153_1al_446,catgctagtttatttcgtttttatgctttcttcttgtgtgtttgataaacCttaagaaaaaccaaaaaaatttagtcatagcttttagcaagtgttaattt
3930394_1al_13415	chr1A	475.744	C/T	3930394_1al_13415,gaataaataagcgcactgcagtgtggcttcgatccggtccggacgaggtgCcggacctatgtaatgcagatctggctgctgcttgatgaatgaaacccctt
4378907_6as_7787	chr6A	57.9667	C/T	4378907_6as_7787,gggcaaaaatgttggatagaaccatggtgcagccgcacctacgctcaaagCcacacatctgttgggccccatccctgggatttgtgcctgacggccaaggt
3890387_1al_1341	chr1A	475.812	C/A	3890387_1al_1341,tatttttactaaagtttagagaacaaacaaatgcaaattcagttaccactCtaatcacatttcacgaagtccagtattgaaccataccaccgagttaaacc
3881422_1al_2043	chr1A	477.01	A/G	3881422_1al_2043,tcctactgcactgacgctgcaatggcgcgcacactgctttttttgtgtcaActgccttcgcgcacactgcagttcgccgcgccgccgacggggtcgatcat
3938652_1al_978	chr1A	477.839	A/G	3938652_1al_978,ctaattttcttagtataaccatacatgaggatgatattgagttgcctcctActtatttggattatgaggctatggtttgccatcattttgttgagaggaac
IWB40291	chr1A	477.655	A/C	IWB40291,GAAGAAGATGAGAGCTAGCAGGAGCTTGCTGGCTACGGTTTGGCGGCTGC[T/G]ATCTGTTGTTTTTCTGAACTCGGTTGGTTGCTGTGTGAGGTGGTTCGGAC
3881983_1al_1382	chr1A	478.254	T/C	3881983_1al_1382,tgccgacgcccattcgccgctgatgtcacaacgccgtcccgccacaccgaTgacgcccacttgtcgccatgccgccgccatcctgtcggcgcccaattcgt
IWA5839	chr1A	480.831	T/C	IWA5839,CTGATGAGAAAGCCAGGCTAGAGGAGCTTAAGAAACAGCGGGAGCTGKCTGCCGCCACCAAAGAGGAAGAGAAGAAGAAGAGGGAGGAGGCAAAGGCCGC[A/G]GCAGCGGCTCGTGTGCAAGCCAAACTTGACGCCAAGAAGGGCAAGGGAAAAGGAAAGGGCAAATAGATTACTCCCAACTGATGTATTAGTCGTTGCATTT
IWB61100	chr1A	482.771	A/G	IWB61100,GGGTCACCCTCGGCATCACTACTAAAGAAATCTCCTGTTTCTTGAGTGAC[T/C]TCAGCACCAACAGTTGTGAAGGAAGCACTGGACCCGTTTAGTTCTTGTGA
IWB7216	chr1A	482.33	T/C	IWB7216,CTACTACTGTATGACAGTATGAGAGTGGTGTGATGACCGTAAGAATAAGG[T/C]GGATGGTTCAGGGATAAAGTGAAGCATCGTTGATCCATCGCCATCCTCCT
3875538_1al_7160	chr1A	482.244	C/T	3875538_1al_7160,ctatgggctgtttgttgttggagcctgcagccctgcgcaccaactgtttgCtggtatgcttcaacgtgggctgtgcttacagtgctttaaacaaagatagt
IWA6372	chr1A	482.338	A/C	IWA6372,CGGCTGACAAGCCTATGATCGTCGTCAACTACAAGGGCGAGGAGAAGCAGTTTGCTGCGGAGGAGATCTCCTCCATGGTGCTCATCAAGATGAGGGAGAT[A/C]GCTGAGGCCTTCCTCGGCAACTCCATCAAGAACGCCGTGGTCACCGTCCCGGCCTACTTCAACGACTCCCAGCGCCAGGCCACCAAGGACGCTGGTGCCA
IWB11516	chr1A	481.655	T/C	IWB11516,CCTGTTGTTCTTCAGCACGATGAAGCTGCTGGTCGAGGTTCATGCTCTGA[A/G]CTTGTATTGGCGTCGCCAGACGTTTTTGACGGATCCTGTATTTCTCATGA
IWB8255	chr1A	480.755	A/C	IWB8255,TGATACCCGTATCGGCAGGGTGATATAGCTTCCATGACAGTCTGAGGACA[A/C]AGGTACTTACTATGCAATAATCAGGGAACGCTACACTAATGTAATATAGG
IWB10042	chr1A	480.756	T/C	IWB10042,TCTTTCCCATGAAAACTTTCCTGGAATTGCAGAGTGCCAGTAACCGTTGG[T/C]TAGTGTTAGTGTAAGCCTGGAGTCCTGACAAATCCTAGTAACCGCAAACA
IWB35655	chr1D	379.796	A/G	IWB35655,NNNNNNNNNNNNNNNNNNNNNNNNNNNNNNNNNNNNNNNNNNNNNTGCTTGGGCGTAGCATATTCTGCTGGCTCTGCCCAGTATCAGTCAATACAGGCAA[T/C]GGCCTACGGTTCCGTGCATCATATGATATTTTACCATCTACACCGCCATGTGATTTACAAAAGATAGCATTACATTCACATTGAGGTACATAG
IWA4179	chr1A	480.831	A/C	IWA4179,ggtggaattactggcttgcaagccaaggaaaggttcaagtctgggcagtgtatctgatgagaaagccaggctagaggagcttaagaaacagcgggagctg[T/G]CTGCCGCCACCAAAGAGGAAGAGAAGAAGAAGAGGGAGGAGGCAAAGGCCGCAGCAGCGGCTCGTGTGCAAGCCAAACTTGACGCCAAGAAGGGCAAGGG
3891987_1al_3051	chr1A	482.557	G/T	3891987_1al_3051,ccgagcactctggcgagtccctgccgttgctgtggtcgtcggcgtcatccGctgacgtggcgccagtttaattagcgctaatgaccctactaaacacccct
3889541_1al_356	chr1A	479.104	A/G	3889541_1al_356,cagacgcagctaactaatgcccgtgccgaactggagaaatccaagaaggcAtctcctggtaatgtttccctccatcgagaaacaattattatgtgccagct
3979006_1al_788	chr7A	629.713	G/A	3979006_1al_788,ggcttttggcctaagttggtctactgccacggttggcctggcgaatatccGaagttgaagctggggtcgtactgagatgcatcagctactgcctgaagcgc
IWB35957	chr1A	482.338	A/G	IWB35957,ATCTCCTCCATGGTGCTCATCAAGATGAGGGAGATCGCTGAGGCCTTCCTCGGCAACTCC[A/G]TCAAGAACGCCGTGGTCACCGTCCCGGCCTACTTCAACGACTCTCAGCGCCAGGCCACC
IWB28550	chr1A	481.653	T/C	IWB28550,GGGTCATTGTCCAGTTTAAGTTTTGTAAGATATATGCGGAATATCTGATC[A/G]CGGCCCTTTATATCTGGTTTGTCAATTGTTATCTGGCGATCAAATCTTCC
IWB6545	chr1D	379.796	A/G	IWB6545,CATGGCGGTGTAGATGGTAAAATATCATATGATGCACGGAACCGTAGGCC[A/G]TTGCCTGTATTGACTGATACTGGGCAGAGCCAGCAGAATATGCTACGCCC
IWB57961	chr1A	483.033	A/G	IWB57961,TCAAGGTTGTCTACTTTTTGCCTGCATAGCTGCTATGCCTTTGTTATGTT[A/G]TGTTGGATTCGGTTAATTATGAGATGCACTTTTGAATTTCGGGTCTTGCC
IWB31604	chr1B	515.45	A/G	IWB31604,TTATAGCCTTGTAACCAGAATCACTGAATCACACCCTTGGAACTAATACC[A/G]CAACTTACACAGTAAAATCAACTAATCTTAGAGTAGATAATCATGCTGCA
3878908_1al_734	chr1A	484.279	G/A	3878908_1al_734,ggggcatatgaaggaggggcaaggtgttggagccatgtcctctggtgtccGacgggagagagaagaagctgcagtgatggagaagggtggacggtcgacac
3918771_1al_5519	chr1A	484.03	C/T	3918771_1al_5519,aaggaatgggttaccttgctgcactttatttactattaccattacttgctCgttataaattatcttgctatcaaactactcgttaccgacaatttcagtgc
3894604_1al_580	chr1A	485.182	T/C	3894604_1al_580,gtgtgttgctggatcgatccattagcctcccaaagttatcccgaagttgtTgtgtgtgcgttggatcaattggaggttgatgtatcatgtgtgtgttggat
3894604_1al_116	chr1A	485.183	T/C	3894604_1al_116,attaatagtcatactaggtgcgccattagtaggggtttttctagtagtgcTgagccgcccccttacaccactgcccgatgttgccgtcagccagcacacct
2282330_1al_1624	chr1A	485.21	A/C	2282330_1al_1624,tcgatggcagcgggccgttccaagcactcactttccattgataccgatgaAcacagcgggatggatccagccgccaagatgcagagcggcggtcgatggcg
IWB16658	chr1D	385.052	T/C	IWB16658,GGCAATGCCCATTCCCCAAGACACCTCCACTCTTGGTACCTGGTGTCAAAGGAGAAGGTGCGATGCAGATAGCGCCTGCTGCTAGCAGACATGAAGATAGTGTGTCCATC[T/C]GGGTGCATGGGGTAGGAGTTGATCATGTCATCCTTGGTGAATGGCAGTGGTGAGGGCACGCTTGTCCAGCACCAGTCCATGCTTGGATTTGAAGGATGTGGATCCTTGATGCCCACCGCAGACAG
3965875_1al_1253	chr1A	485.223	G/A	3965875_1al_1253,tagcagttaacattctatacttttacttttggcagtgcactctactgggtGaccactctcatctacagtttgtgctcttatgtgcaaccaggccaatttgt
IWB64622	chr1A	488.07	T/C	IWB64622,TGACCAGATTTTCCCCAGACTTGGCATTACTCCACCTCCATTGTTTTACT[T/C]GTTGCGTGCCAATAGATTTGGAACCATGGCGACAATTTGGCTAATTGGCA
3972899_1al_1460	chr1A	487.283	C/T	3972899_1al_1460,catcctttacatactggtccgtggctctcgctagaccattttgagcagcaCagaggtacgcctctccagaattgaaggcatcaaatgcctctggtgagaag
IWB10679	chr1A	485.229	T/G	IWB10679,AGTACTCCCAAGTAATTTTGTCATTGTTTCAGTTTCGAAGCTTCAGTTTT[T/G]CATCTCAAGTCTGATTGCCACTAAATTGAGTACAAGATCACTGAAATTTT
IWB56612	chr1A	488.071	T/C	IWB56612,CAGAGGTTCCCTAGCGAGTTTGAGCTGCGCGATCTCATCGGCAGCAGGCT[A/G]CCACCTTCTCCATTCGGGAAAAACATGGGAAACGTCTTGTCTTAGTCGAT
IWB25179	chr1A	485.342	A/G	IWB25179,CAGGGGAAGAACGATCCGATGAAGGTGCACATGTTCGTCGCGTCTGTCTC[T/C]GCCTACGTATCGGCCTTGTTTTGCCACTTGCCCCTTTGAGGCTATGAGTC
IWB27332	chr1A	517.4	T/C	IWB27332,TTCTGCTGGATGCTGAACGGACAGTTCATGAGAATGTGAGATGACATGTG[T/C]AGAGTGCAAAGCTGTGGCCTGCGGAGCTTTGGCTGAAGGTGCCCCATACC
IWB34331	chr1A	517.895	A/G	IWB34331,GCACTGGCGCTACCGTGAAGTTGCCATTGTCTGAATCAACAAGAGCCTGTTGTCAACTGTTGATGGACATCAGCAACCAGGACGAATTTTAGTTAGGAGA[A/G]TCAGTTAAATCGTTGTCGTTGAGACTCATGTTAATGAAGTAGAACAGTTAGGCTTCAGGAGATAGGTTGTCTATCCGTGTTGTGTCCAGGATTATGCTGG
3928881_1al_6537	chr1A	517.504	T/C	3928881_1al_6537,acaaacacttcgcattcgcaagtaatgggctccccaagagcacacatctgTcagcaattgcaacgatctgcgccaccacaaaagggccggccgatggtgta
IWA6710	chr1A	518.019	T/G	IWA6710,ACCAATGGGAATGGCATATCAAGTGCCGCATGTAGTGAGCCCCTGAAGATACCATTAGTGAAGCAGAACGGCTCATGCTCTACTAAAGGTATTGTGCCAC[T/G]ACCCCTAAAGAATGGCAAGATTGCACCAGGTCTACAGTTCAAGCCGATCCACTTGAAGAATACAGGAACAGAGAAGGTTGCATCAAATGGCAAACCGCAC
IWA1740	chr1A	518.021	A/C	IWA1740,GGGCCTTGTTTAAAAGGTGCCAGTGGTCTACTAGGAAGCTCATGCACGGCTGGCTTATTTTTGAGGCGTTTTTGTTCCCTGAGATGAGATGAGGTTGAGA[A/C]GTAGAGCGACGTGTAAAGCTTGCCTCCTTTTTGCTGTTGTTCCCCATGCTATACTGTAGGCTTGAAACCCCACAATCAGCACCCCCTTTCTTCTGTTTCT
IWB23140	chr1A	517.481	T/C	IWB23140,ATGCCCTGTTATTCAACGATTATGTATGTATGAGTTGAAGGCAGGAACAG[T/C]ATGATGTTGTTTCAATGTCTGAACAATGTCTTGCAATCATAGGAAGTATA
IWB58118	chr1A	517.489	T/G	IWB58118,GTAACCGATACAGGTTCATCTTGTTCACACCCATGTTCCCCATACAAACC[T/G]tcgtcttcacctccaggcgagtacatcctctccctagtctcttctgcagt
IWB50908	chr1A	517.895	T/C	IWB50908,CACAACAAGCACAGTCTAACTGTCATTAGTTTCAGGTATTTCTCATGCCG[T/C]CGTTTCCAGTTTTCCCCTGAATCGCTTCCAGTTCCAGCCTGAATTTATCG
IWB54228	chr1A	518.021	A/C	IWB54228,AGCATGGGGAACAACAGCAAAAAGGAGGCAAGCTTTACACGTCGCTCTAC[T/G]TCTCAACCTCATCTCATCTCAGGGAACAAAAACGCCTCAAAAATAAGCCA
IWB28402	chr1A	517.481	T/C	IWB28402,ACACACCTGGACGTTCATCGGGGGTGACATCATCGTCCAAGTTGAGTGCA[T/C]GGGGTGCCTCTGGGCAGACTGCTTGTGTAATGATCGCGTGATCTTCAGGG
IWB54227	chr1A	518.019	T/G	IWB54227,GGATCGGCTTGAACTGTAGACCTGGTGCAATCTTGCCATTCTTTAGGGGT[A/C]GTGGCACAATACCTTTAGTAGAGCATGAGCCGTTCTGCTTCACTAATGGT
3927808_1al_7088	chr1A	520.124	A/G	3927808_1al_7088,cacgcaaacaagtgcggccatgactcgtctcaagaacaaaagagagactaAacataattctgatcaactcatac
3904706_1al_3369	chr1A	520.355	C/G	3904706_1al_3369,tcggaggcggagacggccaagctcggctctgcgtgtcgagactggggcttCttccaggtcagacatccctatttcgaagtttaatttgacgaaaatgcaaa
IWB34600	chr1A	520.413	T/G	IWB34600,AGCCGTAACCAAACATATATACAAATCGAGCATCTAGGAAAGGCTGGGTAGTCAAACACCGAAACGTGGCAGCCGAGCTGAAATCAC[A/C]GATATGAGCTACGGTCGTGACTACTACTCAGAAGCTATAAGCAGATGTAACCAAATCTACAGATGATCGGGCCGTAGTTGTACGTTAAATCATGAATACT
3938675_1al_3241	chr1A	520.531	T/C	3938675_1al_3241,ggtggctgaaccaccgtcatgtgtgggcagaggcgcagagctacggtcacTgagtcacctggtcatgctgcagcgccgaggcctccagtcgctgtcacccg
IWB55	chr1A	520.413	A/C	IWB55,GCATATATACACAACTAAAAGATTTATTAACATGCAAATAGGTAAATGCA[T/G]CCGTAACCAAACATATATACAAATCGAGCATCTAGGAAAGGCTGGGTAGT
7171491_4al_309	chr4A	558.208	G/A	7171491_4al_309,ggcggacacgagagggtagcagcggacgagagcggatgacaagagcgctcGttttgtccgccgcggacacattcatggcccatttttgcgttcaatttggg
IWA6934	chr1A	532.921	A/G	IWA6934,ACTGAGCAAACACCGGCGCAACGGCCCACAATGACCGAGGTGGTGGTACAGCTGCAAGAGTGCCTCRAGCTCGAGAGTGTGCGCTGCAAAGGTGGCAGCA[T/C]GGATCCTGAGTTTTACATGGCCAGTGGCAGCGACCCATTCTCAAGTTATAATCGATACGCCACTAACCAGTCTGCTAGTACGAGCCATAGCAATGATGTA
IWB1972	chr1A	533.141	T/C	IWB1972,TAGGAGGAACCAGCTGCCATCGATCATACTGCTGCAAGCAACGCCATTTA[T/C]AAGGTCGACTCCGTGCCTGCTATCTCCCTTATTGCGGTGTTCTTCAAGTG
IWB35531	chr1A	532.816	T/C	IWB35531,CAAGGGTCTCCCCAAGCCCTTTAACAACTTCAGCGTATATTTCTGAAGACTCTCCAGATGATGGGTTGGTAGTATGTATCACGAAAGCGTAGTCTGCACT[T/C]ACAACTTCTTGCACAAGAACCGACATGCAAAGGTTGGCATGATCAAGCTTCACTTTCCGGGTGCTGAAGTATGCTCTTTCATTCCATTTTGAGGCCCACA
3935703_1al_2159	chr1A	533.439	G/A	3935703_1al_2159,gattggaatgttgcccctcggcaccaccaagccccaccacgttggcgaccGgaagtcaaggatgaggcgacgaggggaagggtgtgcatttagggcctttt
IWB7676	chr1A	533.445	A/G	IWB7676,ACCGACCGTCCGTCCCACTAGTGTTTTTTGATAAAATTTACGCCCACCTC[A/G]GTGATGATCTGTAACCATCACTCAATGTGACGGTATTTGAAAGCCTTTGT
IWA4538	chr1A	533.448	A/C	IWA4538,AGGGAGAGTACAGTACAGTTTGATTCTTTTCTTCTCTTTGTATGTAAAGTTTAGGCTGGTAGTGATTGGGTCCGGATTGAGGACATGAATGGACTACATT[A/C]GAGCTTGTGTTGTTTCTTGTGCCACCATAGGATAACATGCATTCTTTTTCAAAAAAGAAAAAGRACGACTGCGACCGTTRCTCGTTTTTRTTTGGACTTT
IWA4536	chr1A	533.448	A/G	IWA4536,ATGCACACTGCTTTGCTTAAGATACTCGAGAAAGGAAGCTGGGGATCAGCTGGTAGTACATACATTACACATCAATCATGGATTCAGAAGTATATATTAC[A/G]GTCGCGCCGGCCAGGGCAGCCCCTCTGTAAAATCTCCTATATGCGGATGCGGAGTCGACACAAAGAYGCTGATCTCCTGAATATGGTTTATGGTTTTGAC
IWB54196	chr1A	533.903	A/G	IWB54196,TTTGACCAGGAAGTGCCGTATGACACTGTAAACAACAGCTGTTTCTTACC[A/G]CTGCAGGTGTCCTCCTTTGGCTATAACCTTTGTGGTTTGGGCAGGGCTGG
3875389_1al_735	chr1A	533.912	C/T	3875389_1al_735,ggtctatggacacggctagcctggcggatatccatagtaaaagttggggtCgtactgagatgtagcggctatcgcctcctgagctgcagcgtggcgacgag
3875389_1al_747	chr1A	533.912	T/C	3875389_1al_747,cggctagcctggcggatatccatagtaaaagttggggtcgtactgagatgTagcggctatcgcctcctgagctgcagcgtggcgacgagcagcctcagccc
3958588_1al_631	chr1A	533.776	G/T	3958588_1al_631,atctctctacctttcataacagtgatagtaacacacatcttgtcctcataGaactccaacatctcttcaacatcttcatcactcctgattagttgcatccc
3850987_1al_4514	chr1A	533.688	C/T	3850987_1al_4514,taaaagagcatttgaatcactactttagtgacctaaatgctatttccgtaCggagaaagtacaacgcatagcaagatagaataaaaaatgtcaaaaagggc
3667715_1al_6794	chr1A	533.7	A/G	3667715_1al_6794,ctcaggttcgttgtatagaacaaatccaagacccataactgcagtcctacAaacatcatcactgacgtccgatacagcaaaatgcagcagctgatggatgg
IWB45538	chr1A	533.902	T/C	IWB45538,CTACGACTCCCATATTATGTGAGAGCTAATGCTTTTACCCAGCTGAGCCA[T/C]CAGTTCTTGCGTGGTGCCCTGTTCATTATCTATATAATGTTCGGAGACCG
IWB52960	chr1A	534.272	T/C	IWB52960,TTTTTCCNGCAGAGTGTCTATGTAACCTGAAATCTCTCTTGGTATTCTGC[A/G]CCTGTACATTGATCAGCCATCGGTGCTCTGTATGAAGCAAGCAGTACATA
3939640_1al_10665	chr1A	534.279	C/G	3939640_1al_10665,aaacatgtttccgaataaaaagagcccacttagtttcagctgcagttgtaCtacttgatactagcttgaatctgattgaggtcgtcactggccaagtgtag
IWB6029	chr1A	534.266	T/C	IWB6029,ACCTGGAATGGAGAATCAGCGAATCCCAATTCATTTGGCCTGTTGTTTGC[T/C]CGCTCGCTCTATTTCACCTGCTGTAAACAAACAAACGATGTGATCTCCAG
3899676_1al_5733	chr1A	534.239	G/C	3899676_1al_5733,gttaatctctttggagtcagtccattgaacacattcagtttagctgcagtGttcttcagcttctgttcttcacccttcaggaagttcgtgacagacaactt
IWB26708	chr1B	594.492	A/G	IWB26708,CGAGCAAAGGAGCTTAGGCATCCCTCGGGCGGTGGCTACTTGGGTGGACA[T/C]AATGAGATGATTTTTCACTTGGAGGAGCTGGACAGTGATGATGACTGTTT
IWB11558	chr1A	535.315	T/C	IWB11558,TCCAGAAAGAGGAGCTGTGGCCCACTGACCCTTTGCAAGTCGAGAAGATA[T/C]ttctcatcccttgttttgtagagctgaatttcaaacttcacgatgtgggt
IWB45987	chr1A	534.931	T/C	IWB45987,TCAAAATCAAACAGAAGATGAAGAAGCATCAGAGAGAGCGAACAGAGCGG[T/C]AGCAGCTGCTAGGCGATGGAGAGAATACTCAAGGAAAGGTGCCGACAGGC
IWB6517	chr1A	534.242	T/C	IWB6517,ACGGGGAACCAGATACTGGTGCTGTTGCCTCAGATAAAAGAAGAAGTGTA[T/C]GGGAAGCAGCTTTGTCATCACAAGACCAAGAAAATATACGTCCTCCAGGA
3904584_1al_5590	chr1A	535.078	G/A	3904584_1al_5590,agaatatctcgcaccaagtaaaatctgaaatactgcgactcccagtccagGtttaaaatacgcaaatcaggagtttcttaggacacatcatcctatactca
3931760_1al_276	chr1A	535.334	A/G	3931760_1al_276,cgtgtaggggaaagctggagtaagagagcacgtctgtcattgggggaacgAgacagggggaaattagccgacgtgataaggtaggagggagatgcatggtg
3950628_1al_1344	chr1A	535.434	T/A	3950628_1al_1344,ttgtgccaaaaaaaatgtgttttcgtgcccaaattttttataacacctttTttttttcaaaaacaaggctgctattggagattcttggacatcaagagata
7171491_4al_263	chr4A	558.209	G/A	7171491_4al_263,ctggattaggtggggacgtgctgtgtcactgatacgtgggtccaggggcgGacacgagagggtagcagcggacgagagcggatgacaagagcgctcgtttt
7171491_4al_109	chr4A	558.209	G/T	7171491_4al_109,cagcacctccccccatgagctccagcgccagcgccagctgctcccccgcgGtaggtggcggcctgcgccggtggcctcgctcctcgttgcagcggttgtgg
3897602_1al_7726	chr1A	535.445	G/T	3897602_1al_7726,cacggctggagttgccggagctgcaagcagccatggccgaaccaccgcccGgcgacagcggggtgctgcagggagggcaaacgggcgaagaagatggatag
3897602_1al_5438	chr1A	535.442	T/C	3897602_1al_5438,caaacaggagaacctataagtagctatgaacccatgcctgaaaatgtgcaTgggccttcccactagctctgtgtctgtggagcttagcctcgtttctgaat
IWB6995	chr1A	536.439	A/G	IWB6995,TTGGTCATTGGAGAAAATGGTCTCCTGTCGCTGCATATCACACAGCGATC[A/G]ACCAGCCCGTACATTAGCATGGTTGGGGTGGCATCCAGAGCTGGGCGAGC
IWB12579	chr1A	536.439	A/C	IWB12579,TTTGAAGAAAAGAACAAGCTAATATGAGAAGGGATGCCAGGGAAATAGAG[T/G]GTTGGTCATTGGAGAAAATGGTCTCCTGTCGCTGCATATCACACAGCGAT
IWB20654	chr1A	536.431	A/G	IWB20654,CTTTRTCAAATGCAAATTTGGGGAAACACCAACCTCAGAATTCAAATTCT[T/C]GGCCTGAGCAAGGTTTTCCTAATAAGCAATCCTTTGCATCAAACTTGAAT
3929689_1al_833	chr1A	536.62	A/C	3929689_1al_833,atcttagtatcatgccagtagctgcagacccatccgatgaagaaaacgatAtgtcgaccgaaagtgcagcttggccttctgccggtcgcggccatggcagc
IWB31771	chr1A	536.614	T/C	IWB31771,ACATGGCGCACTTTATTGTAATGTCGACGCGTTATTTCTGAATTCTAAAA[A/G]TTTATATAATCAACACATTGCCTGCACAGCTCCGGGAGATGGTGGTGGCG
3929689_1al_1191	chr2B	67.7875	G/A	3929689_1al_1191,ttcctttccgatgtctcgaagcagttgatgatcaggaaggttccaaactgGccgcatttgcgtccacactgctcgagcataatcacaggtgaccagcgcat
3930887_1al_4133	chr1A	536.66	G/A	3930887_1al_4133,catcgctgaaaaccacattctcatccaaaaggatacacttcgctactttgGctgcatcatccaaccgcgtcgcgccaacgccaacatacgcctttagcagt
IWB7289	chr1A	536.665	T/C	IWB7289,ATCGCTCTGTTCGGCCTTGAGCTCTACGGGTGGTTCTGCGTCGGCGAGAT[T/C]GCTGGCCGGGGTTTCACCTTAACGGGCTACAGCGTCTGAGCGCCTTCCTT
IWB4307	chr1A	540.151	T/C	IWB4307,CCTCCATCCAAGTCGAACCACACCACACTGCCGCCGCGTCCCGTGCTCCC[A/G]GGTGAGATCGAGCGCGAGTAGCCAGCCGACGATGAGCCGCCTCGTTTCCC
IWA3805	chr1A	540.147	A/G	IWA3805,AGAATTTATGAAGTCCACGTCCTCTGCAGGCAACCCACACTCATGAAGCAACCTGATCATTTGTTCCATCACAATGCTAACTTTGCTGTCAACTTTGAGG[A/G]CTGGTTTATTTCCCATATAAAGTGCACCCATCAGTTGCAGTAAGGGAATCTCCAATGGGAAATTGAATGGTGTGATTATTGCAACTGGGCCAAATGGCCA
IWB35025	chr1A	540.144	T/C	IWB35025,GCTTCCATTATTCAACACAATGTCAGTTCTCAACCAGCTAATTCTGTCCGTGTTGCTTTCTCTCCATCGCCGTCGTGTTCTTCTAGCTAGTTGTCCTAGC[T/C]TAGGCATATCATGTAGCCGCAGGAAGTGCCCACTTCTTGGGCAAGGGACCAATGTCATATATGATCTCCCTGTGGCAAGACCAGACGAGTNNNNNNNNNN
2668228_1al_1411	chr1A	540.214	C/T	2668228_1al_1411,gagaagaaaagatcgaactatggatcgatcgatcccaaaaaggccccctgCctcgagaaaactcaagctgatgatccactagtagcacactagtctagcta
3896886_1al_1135	chr1A	540.656	G/C	3896886_1al_1135,atgtgttatgggatgacttacaatacatgagaatccattgaattgtatagGttagtcagttatttgtaagcttcatcatccttatgtcaaccataggtggc
3892834_1al_1878	chr1A	540.413	C/T	3892834_1al_1878,caaaactcgattccctctgctgcagcacgcaatggccaccttgcctccagCcgaacaatcgcgtcacaaaacttggtgaaggtggtctggatggtgtacca
IWB40130	chr1A	540.404	A/G	IWB40130,GTTGAAATAGATGGTGTGACTCTCCATCACTGGAAAATGTACCCGTTATC[A/G]TTCAATTTACTGGAAAACCTTTCGAAATTCCAACCAATCCAGCAGATCAC
3884497_1al_10909	chr1A	541.147	G/A	3884497_1al_10909,gggttaattaattgacacaaactcaagcaatcgaatcatgagtactatgaGcaaaactaatgtttggtagccaatacataccatggaggtgattttggaga
3932692_1al_1777	chr1A	540.753	C/A	3932692_1al_1777,cactgcactgcaggcctggacgacgaccaggcccttcacgtagctagccaCgcttgagacgaccagacagacggtggagaggcgggaaaaagaaaataacc
IWB11932	chr1A	543.961	A/G	IWB11932,TGACCGCTTCTCGCGCCCGCGGCTTTCGGAGCGGCTGCGGGTTATTTCCG[T/C]GCATGGCTCTGTTTTTTACAGAAGAGAGCGTTGGCTATATCATCTTGTGC
IWA691	chr1A	544.054	T/C	IWA691,GGAAGTGDAGATCGAGTCGATTTATTCAAAGGGATGATCACAGCACAACAATGGAGTACACAACAACGCCGACATCAACAACGCAACGCA[A/G]CATGCGGCCGTGTACATATTGGTCACAGCTTAATTACACTCATCACACAAGGTACATCCATTTGCTCTCTCCGAGCTACAGTAATAGTACAATGTATGGC
IWB20162	chr1A	544.055	T/C	IWB20162,GTTTGAGCATGTGAGGAACATTGTAAGAGTAACGAAGCCCGTGAGGGTCG[T/C]ggcgatccagtcatcataagaaacaaaagacatgtaaattatacccccga
3939827_1al_7456	chr1A	544.587	T/C	3939827_1al_7456,ctatttggtgacatatgagatgccaagtcctggcacacatttgatattagTgcatgaaacatcttgctttggtccctcctgcaggtgaagcctctgatctg
IWB72959	chr1A	545.335	A/G	IWB72959,TACGAAACCCTGGGGGTCAGCGTCGACGCCTCCCCCTCCGACATCAAGAA[A/G]gcctactacgtccaggccaggctggtgcacccggacaagaatcccggcaa
IWB72212	chr1A	545.89	T/C	IWB72212,aaatggcttcaccttctccctaaagttgagaatgaggaaagggaacatga[A/G]GAACCAAATGATGCTCCAACCAAAAACATTTCTCCAGAAGCTGCCATTGC
IWB68479	chr1A	545.531	T/C	IWB68479,GAATCACATACACGATGTGGCTTGCCAGGAGTTGGTGCCAACGCAGCCTT[T/C]aggaccttccttgaactacatgcatggcaatgcacaagcccgcaattgta
3924040_1al_31007	chr1A	545.868	G/A	3924040_1al_31007,tgatgtatctataactaaaatacatctagatacattctcttttatctattGacaagtatttctgaatggagggagtactatttagcgggccagcggcactt
IWB8040	chr1A	545.891	T/C	IWB8040,AAACTCGGCGCAGGTCTTTGCCAATTGTCTCCAGAAGATCTCAACAAGGC[A/G]CTAGAGTTGGTCGCGCAAGACAATCCTAGCTTCCAAACTACAGCAGAAGA
3892930_1al_2250	chr1A	546.031	T/C	3892930_1al_2250,tcatctgatggggttcctgacattttcccctcgtttttattgaattgtagTgttatctgttatgtttgaatcatggcagaatatgtcagttctgctccgcc
3950844_1al_1722	chr1A	546.054	G/A	3950844_1al_1722,ttgtagctgtagttgtatgcatcgcctgacgtgggcacacgtaagggtaaGagaaattgttccgttaccaaacagaaaatcaaacaaaccaagaataatat
3935088_1al_1843	chr1A	546.045	T/C	3935088_1al_1843,ggagccgcgttctgctcacgtacaggcagttttctaatgcctcgtttctcTtcccccccccttcccttatcttccgccctcgctccatccaggcccgatgc
3935088_1al_1842	chr1A	546.045	C/T	3935088_1al_1842,tggagccgcgttctgctcacgtacaggcagttttctaatgcctcgtttctCttcccccccccttcccttatcttccgccctcgctccatccaggcccgatg
3935088_1al_1844	chr1A	546.045	T/C	3935088_1al_1844,gagccgcgttctgctcacgtacaggcagttttctaatgcctcgtttctctTcccccccccttcccttatcttccgccctcgctccatccaggcccgatgcg
3940324_1al_1890	chr1A	546.914	G/A	3940324_1al_1890,gcactatatttagcgggaggctcacagtcgaattgtgtccggttcgaaccGgaggctgatgatggagaagttcacttcccacccacctcccacttcatagc
3952374_1al_5619	chr1A	546.239	C/T	3952374_1al_5619,atgtcgttcgcgggagacgagttcatcggctcacaaagcggctttgtccgCgatggtgcttcttcggaccagggtatgaaggtttgttgtctctcttatct
3950738_1al_98	chr1A	547.053	C/T	3950738_1al_98,attcaccaaatggatagaagccaaaccagttaaaacggctgagtctggacCagtgatagacttcatatccggggttgtacatctttacggcgtcccccaca
IWA254	chr1A	547.3	T/C	IWA254,ACATCCAAGTATGTTTTACTGCAAAGATTGTAACTCATTTGTAAACTCATTTTAGTGTAT[A/G]TGCTGCAGATGATTGGAAATCATTGCATATAAATGGTTCTGACAAGTGGTGCACTTGGTT
IWA6975	chr5B	239.396	A/G	IWA6975,ACCAATGGCTCGAGTACGCACCACTCATTCTCTCAGGCTCTGAATTTGAAGCYGCKTGCTCATTTCTTGATGGATACTTGGCAACTCGAACCTTTTTGGT[T/C]GGTTATGGCCTATCAATTGCTGACATTGTCGTGTGGTCAAATCTCACAGGAACTGGTCAACGATGGGAAAGTCTAAGGAGGTCAAAGAAATATCAAAGCC
3957201_1al_7514	chr1A	547.299	T/C	3957201_1al_7514,accacttgtcagaaccatttatatgcaatgatttccaatcatctgcagcaTatacactaaaatgagtttacaaatgagttacaatctttgcagtaaaacat
3913325_1al_7267	chr1A	547.131	A/G	3913325_1al_7267,tcactctggcttgctccttggcccgggcaagttcagccggaaggttctcaActgcagcagcaccatctgcaattatgcatgtccgagtatataattttcag
IWB69322	chr1A	547.333	A/G	IWB69322,ttagtctcaacattgtacgggaactccttgctttgcatgagagcagaaag[T/C]GTGTCCTCACCTTCGTAGCGCCAAATAAGCCAGTATTCCTCACCCTTACC
3907672_1al_1639	chr1A	547.577	A/G	3907672_1al_1639,ggctgcagccacgcccgcgatcttcttgctagccctctccctcaagcgccAcccttgccattccgtggactggaccaaaggggtgggcttgtctgggtccg
IWB9961	chr1A	547.907	T/C	IWB9961,ATGGACGAAGGAAATCAAAGGGTATGGTTGCCGAGAGGAGGAAAGCAAGC[A/G]GAGTATATTTGCTTCTGTTATGAACTTGTGGTATCGTGCTCGGCATATAC
IWB39248	chr1A	547.964	T/C	IWB39248,CTCGCCATCGCGCCAGAGTTCTTGGTTTTCCCCTCTTCCGCTCGTCAAAC[T/C]tcgctgcagagtgcagagtgccgaccattccccgc
IWA3146	chr1A	547.966	A/G	IWA3146,GTCCTTGGATGCTTCACCAAGCACCTTTTGAACTTCCCGTATCCKCTGTCGCAATTCCCTGAGGTATTGAGGATTTGCTCGAATGGCTCCAAGACCAAGG[T/C]AGACCTTTGCCTTGATTAAATGATCCTTGATATCCCGGACTCTAGTATCCGACGAAGCCATATTTTTACTCCTGCCATCTGTGTTTTCTTTTTGAGGGTT
IWB9497	chr7A	259.694	A/C	IWB9497,CTACTACTTACGAAGCAAAATGACATGTCTATGTGGTCTACACTTTATTA[T/G]TTATACATGGCTTCACATGACTTTGTGCAGCAGACAAGGCGTACTTCTTG
IWB26168	chr1D	453.406	A/C	IWB26168,AGAGTTTTCATGGCGACGCCGCCCACGACCTCCGTGCTGAACACGGTGAA[T/G]GTGAGATCTGAGTCCGTGCCCGCCCAATTTTCATTGAACGTCGAGGCAAC
IWA735	chr1A	548.564	T/G	IWA735,GTTGCATCAGTAGTTCAGAAATTGCGCGACAAGAAGTGCAGTGGTGTGCATGGCGAAGTTCGCCTATGTAAGTAGTCTAATCCAAGAAGCACATGGTACA[T/G]CACACACCTGGTCTGGTTTGGTCTGGTCTGATGAGCAAGGCGCAATTCGCGCATGTAAGTAAGTGATCTAAATTTATGTTTGGTGTTGGTGTTCTTGTGT
IWB7991	chr1A	548.941	A/G	IWB7991,AAAGCCAACAATTCTCCCATTCCTTCATAGCCGGGCGGGATAATAGATAT[A/G]ACAAAACTATAATGCGATCTTTGCACATGAAACCCTGCCACTTATGCAAG
IWA4931	chr1A	548.943	T/C	IWA4931,gttaccataaactcatcaagacataatattatggcttcatctgaaatctcagctgctaccatatcaaggggatctgaaacacctttatgcatctgcagac[A/G]ACTATGAACATTCAACATGAAATCGTGAAAGTGAATTCGCTTTTTCCTCCAATTAGCTGGCAGTTGCTCATAGAACAGGTCCATAAGCATCGTCTTCCCT
IWB64553	chr3A	707.136	T/C	IWB64553,TAGGGTGGGCAAACACCTGGCGTTCGACCGCAAGCATTTCTCAACAGAGA[T/C]ggagcggagctgcagcatttgtcaagaagagtttgaagcaagcgaagaga
IWB54366	chr1A	549.314	A/G	IWB54366,CGAACTACGAGGCGGTCACTCGACAAGTCATATGCCACGGAGACGCAAAA[A/G]TCATCAAAGAAGGGCACAAGAGCTTCCCCAGTGGCCACACTTCATGGTCC
IWB64556	chr1A	549.421	T/C	IWB64556,CTGCGCGAAGACGAGATCGTCCGCGGCCTTAGGGTGGGCAAACACCTGGC[A/G]TTCGACCGCAAGCATTTCTCAACAGAGATGGAGCGGAGCTGCAGCATTTG
3978429_1al_6815	chr1A	549.609	A/G	3978429_1al_6815,ctgtgtgtgcgatttgttgttgtaacgcgcacgattgaaatgttggtaacAcatgtgttcattggcaaacgctttacaaaactactccctccgttcggaat
IWB64554	chr1A	549.421	T/C	IWB64554,TCAAGCAGTGGCTCTCCCGGAAGAACGCCTGCCCACTTTGCAAGGTCGCC[A/G]TCTCAAAACCATGAGAGGCTCCTACGCCACAGTTTGTATTTTCTGGTAGA
IWB4804	chr1A	550.343	T/C	IWB4804,ATGCTCCTGTTGCAACGCATGGGGAATTACCTAGTCAATAATAACAAGTA[T/C]GTAGCATGTATGTTGGTTTCAAGATTACAACATGGTTTCATCCAAGTGTA
IWB36607	chr1A	550.344	A/G	IWB36607,CTGTCTTTGCGGATCTTCGCTAGCTCTTCCTCACTTTCAGACTTCTTTGG[A/G]tccaaatgccagtataacacaccaatctcttggagcttggagagaggcag
3909805_1al_7696	chr1A	550.443	C/A	3909805_1al_7696,taaaaattacatagcgacctagagtaggcagcactgtagcagccatagtcCcatgttccacagctggatcagccaaatatcatgcataacaaaccagggaa
IWB42176	chr1A	551.052	A/G	IWB42176,GGCACTAGCTTGCTTCTGGAGAACTCAGCAGAAGAACAGAAAGTACTCGT[A/G]CCGTTTACACTCTTTAAAGAAAATATGATTAGACAATTTTAGGTTGGTAG
3932127_1al_3990	chr1A	550.645	G/A	3932127_1al_3990,agagatgagatcgtctcgtcggtcgtggtctttgccccatcagagcgatcGgattcaggccgctgtcgttggcttcgtggcttcctctcctaattttcaga
3955896_1al_2776	chr1A	550.791	C/G	3955896_1al_2776,ccccatggattcaggacacagcttgcccaagctcttgcagcagcgcaccaCcaagcagcaacaccgccgcagctgcagtcccccgttcagctgacggagcc
3877713_1al_4007	chr1A	551.634	T/C	3877713_1al_4007,ctcgtttatcctgctgatattggtgccaagggagatgtaaagacctgcatTgtagatgatataattcatggattcattaccaccattgccagagaacaaca
3885856_1al_4396	chr1A	551.811	G/C	3885856_1al_4396,cacttgctgaaggtgaaaatgggccataccaaacgtgtgaataacatacaGaataggcccgatgatggctgtggtcgtaatgattgtgccttgctctgttt
3974604_1al_3944	chr1A	552.119	G/T	3974604_1al_3944,actacaacctgctacaccacccaacaaccagcacacgcgtcacgtagaggGcttgctgtggtacacctgcagctcggccccgcatggcagtgagttcaaag
IWB62134	chr1A	553.707	T/C	IWB62134,GGTGGGGTAGGTCACCAACCGTCGGCGATAATCTTGTCGCCGCCACCATC[A/G]TTTAGCGTGTGTTTGGTCGGTGGAGGTGCATACCAATGGTGTTCTTCCCC
3961651_1al_3186	chr1A	553.712	G/A	3961651_1al_3186,ttcccgtcgaagggattgcagggtaatgtagcagaaaacaaaaaaattctGacttacgcaccagcccaggaccactatgaagatgcatacaaggtttgatc
3961651_1al_3464	chr1A	553.712	A/G	3961651_1al_3464,acctcatcatatctctcgaactaagatcaaaactatgatctctctaccggAttgcacacatacggtgtcagctatcctgcagggcttcgccatccaaaact
3945862_1al_5241	chr1A	553.721	T/G	3945862_1al_5241,attgatgtaaaaaaacattgtaaatatccacggaggggtggtggtggtggTgggcatggttcacataaagagatgttggtgacgtttccaactagcacatg
3879722_1al_11647	chr1A	555.292	C/A	3879722_1al_11647,gacgacattctttgatttttcaggagttttcaggcacctttggtcaacgaCaatggagctgcagatatctgttgattccataggacgcttaccactacctt
3931880_1al_9373	chr1A	555.133	T/C	3931880_1al_9373,gcatttgcttttagtaatcagattacatcacagaatcaaactggcactggTtttccacatacatcagtgaacagaatttcaaaaccatctatttcacatag
3969498_1al_497	chr1A	555.824	G/T	3969498_1al_497,tctcattcttttggcagtgccatgaggttagagagttttctgccctcgcaGattcgatttattcggatctaatgagtttatgttgttgtgtaagctttttt
IWB22456	chr1A	556.793	T/C	IWB22456,GCTCGCCTCATGCCGTCACGACATACATTCTGGGAGGACATTGTCCCTTA[T/C]GGGGGCTTATTGCTCGATGGGTTCCTGCTCCCCCAGGTCATCCTGAATGT
IWA3284	chr1A	556.939	A/G	IWA3284,CCGAAGCTCGTCGCCGCCTTCTCCGAAGCCGGGATCGCCTGTGGCCAGTGACTTCAGAGCGGGCACACCTGCATGGCGGTGGCGGTGACGACACGCCCAC[T/C]GCGACACTGGTATTGTATAGGTTTTGCAATAAAAATGCTGCCTGGCACATGATCCTTGTGTTGTGTAATGGCATCTTGTAAGATGGGAAAACTTGTGCAT
IWB1372	chr1A	556.793	T/C	IWB1372,ACATCTACGCGAGCTCTCGCGACGACCTCTTCAGCCTCGCGTGGGACATC[A/G]TCATACCTTGTGGGGTGGTCCTGCTGGCCACGCTTCTCTTCTTTCAGCAG
IWB3768	chr1A	556.939	A/G	IWB3768,ATGTGCCAGGCAGCATTTTTATTGCAAAACCTATACAATACCAGTGTCGC[A/G]GTGGGCGTGTCGTCACCGCCACCGCCATGCAGGTGTGCCCGCTCTGAAGT
IWA5505	chr1A	556.939	A/G	IWA5505,GCATTTTGAAAATTTCGTCAAGGAGCACTTCACTTGCCGCGCGCCGCACATCCTGGAAGCCTGCAACGCATACCTCGGCGGCGATCTCGTCGGTCATGCT[T/C]GCGACAGCACGTACATATCAGATGATGGCTGCAAGAGCTGCTCGACCGGATTCAAGATCATGCTTGGCAAGCAACTGCCGAAGCTCGTCGCCGCCTTCTC
3882773_1al_4725	chr1A	556.957	A/G	3882773_1al_4725,taaataatgaaactgaaatgttttagtttccacctggtccgagatcgcacAccgtccgggcttctgcagatgtaactgaaatgttgtatttgtagtcatgc
IWB31275	chr1D	468.468	A/G	IWB31275,AAGCTGCTCATCGTAATCCTCGTTCATGGGCTCGCCATTTTCTTCGTCCC[T/C]TTCTGATTCATCTGATTGAGATACTGAGTTGTCCTCGTCATCCTCGGCAT
3942732_1al_925	chr1A	564.118	G/T	3942732_1al_925,gacaatatgttcgtacctgtcgggcctgaggaagccgatgagcggctggaGccagacgaggccgtagagggcgaccccgatccgctggtgggtgttgttga
IWA7428	chr1A	564.303	T/C	IWA7428,attaagtgttaagttgatatcgtaggagaagtagaggcccatggtcttctctgcagcatccaggagttcggaaatttcagattccatttttttctgctcg[A/G]AAGAAGTGTTAAGCGAGTCATTGCAGCGAAGGACTTTTAGTCCTGTCACTTTAAAAATTGCATGCCCCAAGTATGATCCCACACAATCACGGTCAGTGAC
3178354_1al_2859	chr1A	564.129	C/T	3178354_1al_2859,gcttgaccacaggttatgttgctttatacttattctttagagcatgctcaCtctcatatgtgctactaggacgttgtctgatcctgatctggttctactac
IWB36704	chr1A	564.393	A/G	IWB36704,CATTGCGGAGGCTCTGGGGACGAAGGCTTCGAGGAATGTGTCCGAGGACC[T/C]GAGAAGAGTTCACAATTAGTATTACTATTCTAGGTCGACACGGCTTTTCT
2319797_1al_3656	chr1A	564.585	A/G	2319797_1al_3656,gcgtgagatctctctgcctaccatgctcccgacgctgacacagagcaactAtgaagactggttgttgctgatgagagccatcctgcagacgcgtgggctgt
3922293_1al_2389	chr1A	565.612	C/T	3922293_1al_2389,cactaggttaatatgagaagctaaactacaatgatgttgtacaacactccCtcctgtacaacactccctccatctcattatataagatcctattacatcca
IWB72160	chr1A	566.01	A/G	IWB72160,cagctcacggcaaactcagctgagcaattgcactagtacatccttcctgc[T/C]GCGCCAACCGCTGCGATGCCATTGAACGGGGGAATGTAGTAGGCCGAGGG
IWB72159	chr1A	566.011	A/G	IWB72159,AACTCCATTTTCGAAATCGGTTGGCATGATGGTTCTCTCTCCACTTTCGC[A/G]aggccattgaaatagggatcagccaacgcctcttcagcagtgggtcggtc
IWB72163	chr1A	566.011	A/G	IWB72163,gttttctctgagccgttgctgtaatccttgagaagctgagggtggtactc[T/C]AATATCTCCCTGAATATAAGTTCCTTGACGTCCTCTCTGGTAAACTTTCT
IWB72162	chr1A	566.011	T/C	IWB72162,AGAGAAACATGCTTCCTCTCGGCTGCCCCGCCCTTTCCTCCATCTTCCTC[T/C]aagttagcaaattgcctccggaagttgtcgacagcactaggatatagaaa
IWB72161	chr1A	566.01	A/G	IWB72161,TGCGACGGCCTGTAGTGCGCGCGGTCCTTCTCCACCTCATGTTGCCTGTC[A/G]GAGCAGTCCGGCCTCAGGTGGTGACCGGCAGCCGCTGCTGGAGCCCCCGC
1510593_5as_1356	chr1A	566.316	C/G	1510593_5as_1356,ccaaggtattgggcaacagagtagagaccacagtgaaaaaaggtagcagaCacaaccgtggcaccttgttgttcctgactggcggtttccgcggtgcttgg
IWB1256	chr1A	566.48	A/G	IWB1256,CACCGAGTGTCGTCCGGGTCGGACAGAATAAAAGCATGAGCCTGAAACTT[A/G]TACTAGTACTGTGTTGAATGTCGAACCGGCTGCTGCCTGCTGTCTGAACY
IWB41552	chr1A	566.478	A/C	IWB41552,TGCTGCTTGAAGGGTATAATGGGCCATCTTGCTTTATCTAGATAATGTGT[A/C]TTTTCTGTTTTATGATCTGTTTTTGTGGATTAAAGAGTTGAACTGCCTTG
IWB62751	chr1A	568.013	A/G	IWB62751,CTGTGGACTGTGCCAGCCTTGGATCCATGCCTGACATTGAGTTCACCATT[A/G]gtggcaagaagtttgcgctgaaaccagaagagtatatcctgaaggttggc
IWB11058	chr1A	568.013	T/C	IWB11058,ACTACGGCAAGCTGCGTGTCGGATTCGCCAAGGCGGCCTGAAAGGGTGGT[T/C]GAGCGAGCGCCCCACCGCGGAGGCGAACACTTGCGCCGGGAGAGAGCTTA
IWA6253	chr1A	568.013	A/G	IWA6253,gggatgtccatggctgtgaatccactgatgcactgggcagcagctccttcgccaaccttcaggatatactcttctggtttcagcgcaaacttcttgccac[T/C]AATGGTGAACTCAATGTCAGGCATGGATCCAAGGCTGGCACAGTCCACAGCTGATTCTCCCATGGGGCTTGGCAGACGGTTGCACAGCTGGTTAACGTAA
3885764_1al_10881	chr1A	568.013	A/G	3885764_1al_10881,ctcccaggatcctgcagttgagagatgtatgtatcagcgccagaagcagaAgtcaagcgtcaacaaggtaaatggagaacttgtttatagcatgccgggga
3978001_1al_5497	chr1A	568.033	A/G	3978001_1al_5497,tagtgaggtagcacagcaaacactgtacatgcaaaaaaaataagaaaagcAactgtcccatttttactctgggcattgttgcacgtacactagatgtgtat
3923044_1al_2119	chr1A	568.047	T/C	3923044_1al_2119,cagtttgttttttgtaggaatggtagccggtctgtgaacctgatgctggcTgcagctgcaccagcatgcatgtgcgtgctcgcccatggtttcccatcttc
IWB43028	chr1D	473.865	T/C	IWB43028,agcttcaagcatatcttgaagtggcgcatacgcataaggaaagcattgtc[A/G]TCATCTTCCCAAGTGACACCTAAGGCTGATGGTACTGTGGTGGAGACCAA
3979089_1al_700	chr1A	568.381	G/C	3979089_1al_700,gcaagttgcgcccgccgccccccggttcagtgcatccgatgcaaccaccaGgactacgtgagcatgcagcaagcaaggggctgcaggatggcattctgtca
IWB59427	chr1A	568.111	T/C	IWB59427,GGCTCTGGAGACAGTGAGAATGAAGAGACTCAAACTCATGAAGACTCTGA[T/C]gaggaaatggattctgatgaagaacatctgaggtatgatgctcaacttga
3972838_1al_13196	chr1A	568.651	T/C	3972838_1al_13196,cacacaactcacttctttttacttttgtctcacacaagaatagaggcggaTcatgaaaaaaatttaaggtggggcgaagtctcactaagaattttttttta
3974557_1al_789	chr1A	568.687	T/C	3974557_1al_789,gtcaaggcctttgtgggctctatgtgtataaggtaagataggtttttaccTggtgttatgggctacctgctgggccaacatgggcccgcccctgatgtcgt
3974557_1al_3400	chr1A	568.689	C/T	3974557_1al_3400,ataaagtgtgtgttgtgcgaaggtaaactactgatgtaaagctttttataCatgtgaacttctttacaaacttgtcatacgcggcctagaagaatactgac
3974557_1al_10734	chr1A	568.697	G/A	3974557_1al_10734,tctgcggtgacacgagctgcagcgtcaccgcgttcagctccgtccccggcGccggctgccggtgcggcaaggtcatggcgaagctagccgcggagaggccg
IWA6506	chr1A	570.145	A/G	IWA6506,TACATATGCGTCAAGATACTACCGAGCACCAGAACTCATATTTGGTGCAACTGAATATACTACGGCCATTGATTTGTGGTCCACAGGCTGTGTCATGGCA[A/G]AGCTGCTTCTTGGACAGCCTCTTTTTCCTGGGGAAAGTGGAGTTGATCAGCTGGTTGAGATTATCAAGGTCTTGGGTACTCCAACAAGGGAAGAGATCAA
3937222_1al_2084	chr1A	570.246	G/T	3937222_1al_2084,tcagtaagctattcataatcataatgggtagaataactatataaggctatGtaggaagataagtatgatcaggggcgattctaccgtccggtcaccccggg
IWA7707	chr1A	570.449	A/G	IWA7707,TGCAAAGTCGGAGAGACGGTGACCGTGGAAGTATTGCGCGGAGATAAGAAGGAGAAGATCGCTGTGGTCCTTGAACCAAAGCTCGACGAAACATAGTGAG[T/C]GGTGTCCTTCTCGGGTGTATTCTCACGTAGGTACAAGGTATTAGCATGTTGGCCTACCACGGAGCTCCTTGTACATAATTGATGTTTGTAAATTGTCTGG
IWB22882	chr1A	570.45	T/C	IWB22882,gatacagttggtggtatcgtggatcagcttatacaatttgggaaagtgac[A/G]AGACCTATTTTGGGGATAAAATTTGCCCCTGACCAATCTGTGGAGCAGCT
3918914_1al_6266	chr1A	570.653	C/T	3918914_1al_6266,cgagtcgtctgtgaacacctcggtggcggcggctgctgcagttggcactgCtgtttgccttggcccagtcgtgctcgatggcaagcacgaggaggcaggat
3927878_1al_2966	chr1A	571.431	A/C	3927878_1al_2966,gtgtgtgagcattagttgttttgcccacacgtaggtgtgtgggctggttgAtgtccatgccacacgaggcgtgtggcacaactacccgatacaccacatgt
IWB23045	chr1B	661.502	T/C	IWB23045,CCACCCTTATTGTTAACATCTCCCTTGAACTCATTCAGTAGATAATCAGC[A/G]TCAATGCAATGGCATTCCTTTCTTGTCTTCCAAAAGAGTGTATCAACAAA
3979284_1al_881	chr1A	570.721	C/T	3979284_1al_881,ccaccgccatctcaacacgctgccactgcagctcttgagccgcggtactgCctctgagctgccgcgcctgagccacgaacgcctaccattctgtttgcagc
IWB15565	chr1A	571.274	T/C	IWB15565,TATTGTAAATTTTCTTTCTAAAATTGTAAGGAAGTTGGTGAGAGCAATGAAAAACAGCCACTGTTATTTGTTGATGCCCTCTTTTGGAAGACAAGAAAGGAATGCCATTGCATTGA[T/C]GCTGATTATCTACTGAATGAGTTCAAGGGAGATGTTAACAATAAGGGTGGTGAAGTTGGTTCAAGTAAGGGATGGGGAGGTCCAGTAAATATAGCAGATTCTCTTGGTGACGATGAAGCTGACTA
IWB4244	chr1A	571.58	T/C	IWB4244,TCGGGTAAACATAGCATGTAAGGCTCTAGCTCAAAAGTAAATACACGGCA[T/C]TTGAAGCCCCTAAATCTGTACAGAAACCTAGCCCTAGGCCCTCGTTGAGA
IWB33223	chr1D	477.218	A/G	IWB33223,ACGGGTCATTCAGCAGCAGAGCTTACCTGAACTCACAACGACTCCGGTGC[A/G]CTATCATTTTGCAAGATGGTCTTTTTTAGTAAATATAGCAGTATTACCTT
IWB51467	chr6A	579.816	A/G	IWB51467,CCATGTTTCCCACAAAATGAAAGCATATCAGCTTTAAGCTTGTTCCAACC[A/G]TTATCTCTTAGTTCCTGAATCAACACTTTTGTAGTTTTAACATCATCCAT
IWA7893	chr1A	573.333	T/C	IWA7893,AGTATATTGATTGCCCATGAATCTGTATTGATTGTTCATGCTCCAGTTCAAGGATGTATTTTCTGGTTATTAGGAAATGGTAGATGCATATGCGGTTATT[A/G]TATATGCTTTCCAGTTTGCTGATGAGCTATCTGTTTCAACCATAGAGATAGATTTATAGTAGTGTAATCAATCTCTTGTCATGCCATCTTCTCAAGTGAC
IWB14279	chr1A	573.233	T/C	IWB14279,CTGTCCATGTAGATGACACACTAGCAGAAGAAAGGAATTTGCGGTGGAAT[T/C]AGCTGGTGTGTTCCCATCCTGTAAAGCATCTCATCATGTCAACCATACAC
3892403_1al_5755	chr1A	573.387	C/G	3892403_1al_5755,aattaggcgctctactttcagattggcatcaagcttgacgatgtggtgacCtgctaggacgggtgacatttatctgtcttccttgcatctcatgctttgat
3978830_1al_10357	chr1A	574.341	A/G	3978830_1al_10357,ttgtctgaaagaagcgaggcataagcttgagcgaaaaattcagattaacaAaaggaactattgacgcagtggagaagtagaggagtacctttcttaggccc
IWA1368	chr1A	574.357	A/G	IWA1368,TAAAAAATAAAGATGATGAATACGAGAGCGTGGATGCAGCTGACGGCGTCTCTCAGAAGATCGCTCAACTGAAAACCTGATTTTCGAAGGTTACAGAAGC[A/G]ATCGGTAGTATATACTATGTACAACAGCATGTCTATAGGCGCTCAAGATCAGAATGATCTTTAACCCAAGCCAAGAATTCTATACAACAAATAAGACCAC
3917047_1al_5895	chr1A	574.216	G/A	3917047_1al_5895,tgcaacagaggtcttgttgcgaattttttttgcaacagaggtcttgttgcGgatttttttttcaacaaacatcttgttgcgggtttttttattgcaacaga
IWB36475	chr1A	574.641	A/G	IWB36475,TGTTATTGTAGACCATGATGATCATGCAGAACTAAATGGTATGTTCTTCC[A/G]TACATTGTTCTTTGATACCCAGTTTTGAACAGAATACTCTAGGAAAATTG
3954527_1al_5844	chr1A	574.358	T/C	3954527_1al_5844,tagtttctaggatgtggatgtgtcaacataacaacgagcacttgtgtttgTgtgtcttgcctcaaggtggtaatggggaataccctctggatattgttaaa
IWB2446	chr1B	666.258	A/G	IWB2446,TTATTGCTGAAAGGTTGGGATTCATGCTGGTGTTTGGTGATCTAGTTTTC[A/G]ttccttttaccttcactattcagggttggtggcttctgagaaacaaagtg
IWA6152	chr1A	574.936	A/G	IWA6152,ATGTATACAGCGAATGGATCGATGAGTGCGAGCGTGTCAACACTGTTGAAGATGACGATGGTGCATGAGCAAGTGTAACTATAATACTCTATGATCTCAA[T/C]GTGTTGATGTCATTTACTGCCACCGTCAGCCATATCTGTAGTAGCATTGTAACAATGTACTGGCTGACTTAAACGTTAGTAGGCAGTTTGTCCCGTGCTT
IWB4214	chr1A	574.936	T/C	IWB4214,GTAACTATAATACTCTATGATCTCAACGTGTTGATGTCATTTACTGCCAC[T/C]GTCAGCCATATCTGTAGTAGCATTGTAACAATGTACTGGCTGACTTAAAC
IWB34929	chr1A	575.216	A/G	IWB34929,CCGGTTCAAGAGTGTCGTAGAATTCTGTCTGAGTACAGAAGTCTCGTTGTTATNGATGGCTTACGGTCTAGAGAGGATTGGGACTTGATAAAAGCCGCCT[T/C]CGTACCCGATTCTACGAATGCATGTATCATTGTAATTACAAATGAAGCAAGCGTGGCTACACATTGTGTAGATAAGGAAGATGGGGCGGTCAATGTCAAA
IWB54198	chr1A	575.364	A/G	IWB54198,TCCTGGACCAGGAGCTCACAGTCGGGGAGGTAGAGTGAACCAGTCCTTCC[A/G]TTCAGCTTCTGCTGCTGCTCGCCCTCCTATGGCACGGGGAAGAGGACGGA
3934532_1al_3396	chr1A	575.684	G/A	3934532_1al_3396,tcgtatgtgtgtatgtgtgtgactatacgatacaaaaatgatgatatgaaGatacaggtattcaacattccggatagttggtttgaaatgcggaattgtaa
IWB3070	chr1A	576.637	A/G	IWB3070,GTCACTATGTGCAAAGTACATAAGGAGGAGGAAGAAGAAGCTCTCGTCTC[A/G]TCGCTTCACTGGTCAGTAGCTAGGAGAGTTCGGTCATGGCCATGGGCACG
IWB42330	chr1A	577.841	A/G	IWB42330,GCATCGCATGCAGCACCGCTAAAGCTGTCGAATGGGACGCCGCCTGGTCC[A/G]AGCTCCTCGACCCGTCTGGCCGCGCCGCTCTTGGCGTGCATGATGCGGCG
IWA4897	chr1A	577.841	T/C	IWA4897,GTCCAAGCTCCTCGACCCGTCTGGCCGCGCCGCTCTTGGCGTGCATGATGCGGCGTACGAAGAGAAGGCTCCTGCATCGGTCGATCCTGTCGTGGATAAC[A/G]TCTCCCGTTCACCTGCACATGACGTCAAAAGGCTCAAAACCGCCATTTCAGCAGCTGCTGTATAACCTTCTATTCCATGGTTCCAAAAATGCCGTCGCTT
IWA4898	chr1A	577.841	T/G	IWA4898,TGCTGTATAACCTTCTATTCCATGGTTCCAAAAATGCCGTCGCTTAGTTTAATTCTAGCTTTCCTGTCTGTAGTTCATTCAGTCATGCAGTGCAGAAATC[T/G]CTTTGCTCTACTTTTTCGTTCATGTTTTGCTTTCGCATGTATGTACCAAGTTAGTTTGTTTATGCAGTGAGCATTTGCGTTGTAAATAAATATTTCACCG
3951578_1al_6160	chr1A	578.348	A/G	3951578_1al_6160,caatctctctctttttctgcagggtactagcaggcacaatctattggttcAgaatctgtgtgctggtcatatgcttcacaacctatctaccgatccgcgac
3912401_1al_2967	chr1A	577.866	T/A	3912401_1al_2967,tttactcaagtgagcttttataattgatcaaggtcctttttgcacaaaatTtttttggccaagtctatagaaaaggacgccgataagtgccacacgtgtgg
3845108_1al_5228	chr1A	578.361	C/A	3845108_1al_5228,aatgcacgaataggtgtgtccaatcttccggctccgagaggcatagagggCagcaagggttattaggccatcccctacgctgcagattgtctgccgtcaaa
IWB8339	chr1A	578.564	T/C	IWB8339,CGATGATTCAGGCAGCCTCTTTACCGTTACAGTGGCATTGGAGGTGTTGC[A/G]TTGCTCGGATAGTGAACCTTTTGCTCTTCAGATTAGCTGAGAGGGAGGCT
IWA2994	chr1A	578.519	A/G	IWA2994,GTCCACATCGCTGTACTCAGCGTCAGAGTTAAGTAACCGGGATCCTAGTATCAGCACTTGCCCGGATAACTTGGCTAACATTTTCTGGAACATGGAGTAA[A/G]TTCTCTGCGATCTGTGAAGGAAGTGGTCAACATCCCTTATGTAAAGAATAATGGGATCGCTTTCAGCCACAGAAATCATGACCTTGTAAAGYGACTGTAT
3881680_1al_971	chr1A	578.82	T/C	3881680_1al_971,tcctcaatgacatttttattcaatcgatatatcgagatgatatattcgtgTcgggcaaatatctgcccctgcatatcacgatacacaggcaacccgtccaa
3975233_1al_5235	chr1A	578.902	A/G	3975233_1al_5235,catctccagccgttggcctttcaggggacacctaaaatcgtcgcctggggAtgagccggcgcaaaaaaagattctgtaggcgagttggtcctcagtcgccg
3975233_1al_5228	chr1A	578.902	C/T	3975233_1al_5228,cttagagcatctccagccgttggcctttcaggggacacctaaaatcgtcgCctggggatgagccggcgcaaaaaaagattctgtaggcgagttggtcctca
3943783_1al_8115	chr1A	578.79	A/C	3943783_1al_8115,agaaaccttcctatcctacaacgactgaccggccggccttgattgtgcagAcccaaatgattgcggttttgactcgccccagcagcactgttggtaacttg
3918467_1al_6848	chr1A	580.094	A/G	3918467_1al_6848,tgagtacccctactagctctccgaggaccaaagtaaagaacctagccaaaAacactacatgtatgtacacaaaaaggcaaagcgcaagaagagaaaagcaa
IWB6843	chr1A	580.422	A/C	IWB6843,AGGCGTTAATAAGAGATACGACAACTGCAGCAAGGAAGGTTATAACAATG[A/C]GTTTGGATTCGATAGCATAACTAAGACATGTGATGAAGAGAGCATAGAAG
IWB11395	chr1A	580.422	T/G	IWB11395,TGACAACAACTTTGGAGTTCAAGGCGTTAATAAGAGATACGACAACTGCA[T/G]CAAGGAAGGTTATAACAATGCGTTTGGATTCGATAGCATAACTAAGACAT
IWB43929	chr1A	580.425	T/C	IWB43929,AGGAAAACCTATTTCCACACACTCCATTCCTTTACTTGAGATATATCTCG[T/C]GATGGTATATTCGGGCAGAGGTGTAGCTCCAAGTTCCTCCTGTTGTGTTG
IWA3089	chr1A	580.422	T/C	IWA3089,CGGAAGGCCAATAGTGATGATAGCAGGAGCAGCAGCCTCGAAGATGAAGCTACAAGCAAAAGGTATGAAGGAAAGAGCAAACAAGATGACAACAACTTTG[A/G]AGTTCAAGGCGTTAATAAGAGATACGACAACTGCAGCAAGGAAGGTTATAACAATGCGTTTGGATTCGATAGCATAACTAAGACATGTGATGAAGAGAGC
3974885_1al_6237	chr1A	580.153	A/C	3974885_1al_6237,ataatacctctcttctgtcaccccgtgagctggttaattgtatcatcagcAaaggcccaagggtatgctgttgtggagcgaccacgatagcctatttctgt
IWB31719	chr1B	673.641	T/G	IWB31719,GTTGTGCTCACTACCTTTGCAGGTACATTCTTTCTCTTGGCTATTTGTTC[T/G]GAAACTTAGATTGATGTTCTGAATTTCCATCACGTGTGGTGRGTAG
3884595_1al_11718	chr2A	561.246	G/A	3884595_1al_11718,cagtcatgtgtcggtgtgctcttatatcattcgctggaaaggaatgttttGaaagtcgctagagaaacactctaaccttcgccgggacactcgttttccat
3922137_1al_9593	chr1A	580.961	G/A	3922137_1al_9593,gctgctgctatagtgtgagactgatcacagccactgaacctgtagaaaagGacctcacatggcaacaaggacgacctatgatccggtggtggcagctagga
IWA7182	chr1A	581.583	T/C	IWA7182,GCTTGTCGCAGTACTAAGGAGCTAGAGGAAAATGTGAAAGAAAAACTCTCCCAGTTTTGTCATGTGCCGGCCGCTAATATTTTCACCCTATATGATGTTT[T/C]GAACATTTGGCACATTCCTTTGCTGTTACGGGACCAGAAAGCACACAATGCTATCCTTAAAGTTCTGAATCTTGAAAGTGTTGCCCAGGAGCCGAAGTTG
IWB53622	chr1A	581.829	T/C	IWB53622,TATTATAGCAAACAAAAATTGGAGGATTGGTTATTCTGCGGAGGAACGAG[T/C]GGTCGCACCATTTTTGGCGTCGGGCCAGTTTCCATTTGAGTTGAGAAGGA
IWB12695	chr1A	581.543	A/G	IWB12695,TGATCTATAATTATCTGATCACCAGTGCTCCGGTGCTCGCTCGATCACCA[A/G]TAGTCGTCGCAGGAGCACTTGCCGTCGACGAAATGGTGGAACCGAGAGGC
IWA8051	chr1A	581.586	T/C	IWA8051,CCCCTAGTACACCAGAACGGGCACGCGCAGAAGCAAGCCAATGGTGGTGTAGCAAATGGAACCTGCCATGCCAACGGCAATGGCARTACCCATGGTTAGC[A/G]CGCCGCGGGTTTCGCCAAGGGGATCATCTCGCCTGTCTTCTGTGGTCCTCATCGTCCCGTCGACTGCGACAAYGGCTGAGCAACTTATCAGCAGGGCCGG
IWA1558	chr1A	581.586	A/G	IWA1558,GACAGCTYCTCGACACCCCTAGTACACCAGAACGGGCACGCGCAGAAGCAAGCCAATGGTGGTGTAGCAAATGGAACCTGCCATGCCAACGGCAATGGCA[A/G]TACCCATGGTTAGCRCGCCGCGGGTTTCGCCAAGGGGATCATCTCGCCTGTCTTCTGTGGTCCTCATCGTCCCGTCGACTGCGACAAYGGCTGAGCAACT
3908627_1al_9191	chr1A	581.59	A/G	3908627_1al_9191,gttttacagctgcaacttgatggcgagctccatgcatcaacttaatgatgAccatgcctgttcgtttctacacaacatttgaaccatcccactgcagcgcc
IWB58885	chr1A	580.496	T/C	IWB58885,gcggaggatcgaaaggcaaactgaaggtctggaacacactgtctgaaccc[A/G]CCGTCGCCAACAAATTTGGTAAGGGGCGGCAAAATGCACCAGCTCTGCGA
IWA1557	chr1A	581.585	A/G	IWA1557,GTCGGACTAATCGCTGCAGCATGCGGACAACTGGACCAGGTGCTGCAGGACAGCTGCAATGGCCATGTGGTTGCGGCTAAACACAAGCTCGGCGACAGCT[T/C]CTCGACACCCCTAGTACACCAGAACGGGCACGCGCAGAAGCAAGCCAATGGTGGTGTAGCAAATGGAACCTGCCATGCCAACGGCAATGGCARTACCCAT
IWA6458	chr1A	581.831	T/C	IWA6458,GAGGTCCGAAGCGCTTCTCCGGCTTAACAAACTAGAGGAGGCCGATTCGACTATTACAAGTTTGCTGAAATTGGACAGTGCATCCCTATCTTCAATGTCC[A/G]CCAAACTGTCAGGCATAGTAGCTGATTCATATGTACATGTTGTGCAATCCCAGGTCAACATGGCATTTGGGAGGTTTGATGCAGCTATTGCCATAGCTGA
3884595_1al_5840	chr1A	580.437	G/T	3884595_1al_5840,atttgtggtgaagtgtctcgacacgagattattcgagcttgcattctctaGctgtttgcagcaatctagcgccaacattttgacctactgaataagtctga
IWB34851	chr1A	582.867	A/G	IWB34851,CTATGATTCATGACGGAACCAACATGAAGCCCAGTTTAGATAGCTCAAACACTTCTCACAGGTTGATTGCATCCGACTCTAATGCAACTCTCTGTCACTC[A/G]GACAAGGATCATGCGCTTATAACACCAGAGACTAATGCCACAATAATGCTTGAGAAAGGCAACAGCCAGCTCCGTACTGTGTCGAGTCAGCAGTTTAACC
3910946_1al_10339	chr1A	582.872	T/G	3910946_1al_10339,attgggggttggatcttgcttcctgctcctgtgctgtcttccctttttgcTtttgtacatattttattttattattacggttattatttttccatggctgg
3882994_1al_1362	chr1A	582.843	T/C	3882994_1al_1362,gcacattgtgtcaagttaaagacaagtgcgccgaaccactacaacaaatgTaatgttattagctgttaaaatgatcaacatatgttccaatggatctccag
3899254_1al_4139	chr1A	583.117	G/A	3899254_1al_4139,atcttatgtatttgctggtctagtcactcaaaatattaattttactatttGtgaatcgtagatacttcgatcatcctgctaggggcacatcagtttggcaa
3870237_1al_1217	chr1A	583.288	T/C	3870237_1al_1217,agacaagggaacttcatagcaagttcatctttggtgatcccaggtctcgaTgatccagccaccctcgaagtgattgcatgccgcgaggcccttacactcgc
3870237_1al_63	chr1A	583.287	C/T	3870237_1al_63,atgcatcaccatgatcttgcgtgtgcgtaggaaattttttgaaattactaCgttcccctacaaaaggaaggtaatattcttggcccatcatgagatcttgt
IWB45411	chr1A	583.291	T/C	IWB45411,GTGATACTTGTTCATCCAACCCTTGAGATGAATATGTGCTACAATATGAT[A/G]CAAAATCCTCCAATCCTTGAGGGGGATCCCATGTAGATTCCTGTGTCAGG
533364_1al_2770	chr1A	583.363	A/G	533364_1al_2770,cccccctcactctaaactacgtctatatacattttatgtagtccatattgAaatctcctctaaaaggatttatatttagagccgagtcacgagttccgagc
3979536_1al_394	chr1A	583.709	A/G	3979536_1al_394,atggccgctttgtcttctcctccgatttacgtgagtcttggtgctctcgaAcatcaatgaggtagtatgacccgttgtgcagattcttgctgaccacgaaa
IWB8702	chr1A	584.479	A/C	IWB8702,ACCAAGGGGAGAACATGAGCGAAAATCGTCTCCCATGTCACCCCAGAAAA[A/C]TCCCGCATAGCAAATCTCGCTCGAGGAGATTGCCTCCTCCTTCTTGTTTA
312083_1al_5104	chr1A	583.896	T/C	312083_1al_5104,gtacttggccttgtaatccctccacagctcctgcacggacttgcccataaTctgcaggaagtcgtcgtcgctgtagccgtccttgagcctctggttgagca
3893918_1al_8613	chr1A	584.076	A/G	3893918_1al_8613,gcgctgacgcctaattttgtctaagtcataaggggactcgcgaacgaagaAtttttctcctcaaagaaggcgacattatcaaacttgggtctcctgaggct
3878613_1al_2740	chr1A	584	A/G	3878613_1al_2740,agctagggctcctcgccgccggggggatctctctgatctggtatgggtgcAgaagggtctgttccagtcaggcgtgttctcggtggatgattgtcatcctg
IWB57894	chr1A	584.469	T/C	IWB57894,CTTGTTTTGGTTGGAGCCGCTTTAAAATCTGGAAAGATGCAGCTTCTTAT[T/C]GTCTGTGCTTTGTTCTACGTACTCTTTCTGAGGGCACCATCTTTTATGCG
3945143_1al_1223	chr1A	584.642	G/A	3945143_1al_1223,gcgtattcagatatcaaatgggcacccaataggctcctcaaaattaaaccGtctggacagtctgggctcccccaaatacagatcatatgttggggagaaat
3926150_1al_9975	chr1A	586.108	C/T	3926150_1al_9975,tttcacgtcagtttttgtatggcaaaagcctccgtcgtcggaggaggcacCgcgttgtgctccttcaagaggaacatgttgtaatgatgctttgcctgcag
3960046_1al_837	chr1A	586.256	C/T	3960046_1al_837,cacgccggtcagcctccattgatgcctcatggatggcgcagtgaaggcgcCgtgacgcgcgtcccgccctctcccgctgcggctataaaaggagacctccc
3887555_1al_15104	chr1A	586.343	T/C	3887555_1al_15104,tctctgataagcagcagaagagatatttttacgatacaagaagaaagcagTcacaactacagtaaaaacaagcaactacacacacaggagttgtaaaatat
IWB9141	chr1A	585.821	A/G	IWB9141,GGTCAGCCTGTGGCCTAGACAAATCAAGTAGATGATCTATTTATAAAACA[T/C]ATGGAACCATGCAAGAGTTAATTCAGGATTCTTTGTGCCACCTAGAACTG
3964204_1al_736	chr1A	585.551	C/A	3964204_1al_736,aggggggtttctcaccaggcctcatgggccggctggaggagaggggctggCtgcagcgctgggccacgggtcgcggtcaacgggaggtgtcgaggcagagg
3932817_1al_8225	chr1A	585.683	A/G	3932817_1al_8225,ggccaacggggggggccaagagccctctttggccaacagaaggctgacggAtcatagttttgatttttatgcattaggacgtatagtttttgaatttgcta
3964204_1al_666	chr1A	585.551	T/C	3964204_1al_666,atcatagcataggaaaaaaacaagtcgcgggccgaattagagctacaggcTgaaacaggacatgggcactaggggggtttctcaccaggcctcatgggccg
3977278_1al_1171	chr1A	585.635	C/T	3977278_1al_1171,ctctgcagaaaaatgcttccacgagacacaagatttactttcgcgagaaaCacaacctgtgctcctaaaaagtgaaaaaccgcaactatgctttcagcctc
IWB45449	chr1A	586.952	A/G	IWB45449,CATGGTGATAACTAGTTCCTCAGCTCTTTCGGTGACGGTTTCTTCGGTTA[T/C]GGTGAACATATAATAAATGTGTGCCGGACAAGGAAAGTTCACATGGAAGT
IWB7128	chr1A	586.952	T/C	IWB7128,ATAGATTCAGTCTAGCATTTCGTACCTTTTGGGATCGAGCAGTTGGAAGC[T/C]TAATTGCATTGTGTGAAGGTATCACATTATCCATATGCTGCGGTTGTATG
3976072_1al_1919	chr1A	586.999	T/C	3976072_1al_1919,gagcagcagctcactcctgtcagctgctgaaatatactctaggagtagtaTttagttatgtgatgtccgtcttaattctattggaactcatcataatcaga
IWB39	chr1A	586.996	A/G	IWB39,TCTGCTTTGAGGAGTTATGATGAATTCGGTATGTACTCCTTATCAGGCAC[A/G]CATGAGGGCCCTGCGAGTTACAGCATGGGTATGGGCATGCCCAGCATGAG
IWB8006	chr1A	587.361	T/C	IWB8006,AAGATGCTCTTCGGCTCCATGCACCTCAAGTCGTATGACTGGGCTAGAGC[T/C]aactcagaggctggccctaacaacgcgctcatcacctcagatggggctcg
IWB34513	chr1A	586.953	A/T	IWB34513,GTCATGCATTGGATCATGGTGATGCAGGTTTTCTCACCTCAAGCTCGAATGATGGTAGTGGGAGTTTGGATCCCCATGGCATCGCATTGGATATCAACAA[A/T]GTTTTTCCGGATGGAACCAACCTGTCTGTTGTGCGGAAGGAACTGGCTTCCCAAGCAATAGAGCTTCGGAAACGTCGCTTGCAGATTGAAGCACAGGAAC
IWA693	chrUn	2.2206	T/G	IWA693,cgctgtgttgtaaaccgttggctgctcgag[A/C]ATGATCCTCTGCAAGTGTTTGTAGCAACATCCCTTCTCTGTGATAAGATTGTAACTTTATCTGTGCTGATGTAGAACTTTAGTGGTGAATCTCTCTTGTT
3966036_1al_1056	chr1A	587.885	A/T	3966036_1al_1056,tgaagacgtatcaatgatcatcttctctaatgaggagtgcaactggcactAgcgtggtgcctagagatgggtttgcagggggtaccaacatgacctacttc
3971039_1al_2867	chr1A	587.834	T/C	3971039_1al_2867,ccaggtctgtgaactcgcgtccgggctcaagctctcgggcgtccgggctcTcgtgcgcacgctgggtgaagctcgctcatcagctcatggagagcttcctg
IWB28321	chr1A	588.768	T/C	IWB28321,TTGAATGAATACCGTGCGTCGCTTATCCAGCAGAGGAAGGAGCAGCTGTA[T/C]GTTCTCATTGCCGGCGCCGAGGCCAATTCCCGCACCTTCTTGCTGAACAA
IWA4518	chr1B	683.411	T/C	IWA4518,cttgctgaacaaaagtctgctcaaggatctctctacacaagtcaagcctagaccagaggaccctcaatggcgcaagatatgtagaaccaagaaggtgacc[A/G]ACTTCACTAGGTCGGCGGGTATTCTTGTTATTTCTGGGCTCACTTATTATGCCTTGAYTTCCCGTCCTGAAATCGTAAGGTATGGTGACTATCTTGTTAC
3871814_1al_651	chr1A	588.766	C/T	3871814_1al_651,ggacttgcccatcacctgcagtgccaaaccacataacaagccatcgtctgCtagttgttgccgaacaggtagtagaggctgtacacactccagaaccagtc
3892611_1al_1417	chr1A	588.466	C/T	3892611_1al_1417,gcacaacagtatgatcccaactattcttcctcatcatagtacaaccccaaCaactattattatggatatccggcaggccagccgtggccatagaccaactt
IWA8523	chr1D	490.6	A/G	IWA8523,GGCGTCGCCTGCTCGTCCACACCCAGCAGCTTTCCAAATCCACCCGCGCC[T/C]ACGAGGAAGGAAACCATGCCTTGAATGAATACCGTGCGTCGCTTATCCAG
IWB59296	chr1A	588.903	A/G	IWB59296,AGCGAGGAGGCCGCGGAATTGGCGTGGGCATTGGCGAGGAGTTCGTACAG[T/C]TCCTCCTTCTTCTGCTCAACTAGCTCTGCACGGTGTTTCTCCTTCAAGGA
IWB26254	chr1A	588.903	A/G	IWB26254,ACAGTCATATATAGGTGGCAGATCATAGACAAGACATATATAGGTGGCAG[A/G]CCATATACAGTCATTTCAAGAGACATACATAACATGGTGCCGGAAAAGAA
IWB34872	chr1A	588.907	A/G	IWB34872,GAGGGTGATGGGAGTGGCAATGACAACAAGGACAATAGGAGTGGCAAGAAGGGGAATGAGAGTGACAAGAAGGATAAAA[A/G]GCCGCTCGCAAAGAAGCTGTTAGATCTTTTGATGGCACCATCCACTGCGGAAAGTTTGTACCAGGATATCACCACCAACTGGACCAAGTGGGGATACCTT
3976442_1al_9754	chr1A	588.907	T/C	3976442_1al_9754,ataaaactaggtgacactatggttaaataggcaattaagttatcatgtcaTgtggcacacaaacaaggtcagaagcaactgaatgctgaagaacaagtaaa
3473141_1bs_756	chr2B	798.141	G/T	3473141_1bs_756,tcacgtctaggctattttagcacttagacgtgggtccgatgtaggccgcaGaatcgtttttataatactgcgttggcagagtcttgaactcaaggcctatt
3482114_1bs_10487	chr1B	1.43449	T/G	3482114_1bs_10487,ctgtggtcgtcctgcaggcgcgaggtgacgtcgagggactgcttgagcttTaggttggtctcgccgtcgaggttcatggtctcgacgtagcagatggcgtc
IWB10784	chr1B	1.84828	T/C	IWB10784,GCTCCAGGAGCTGGAGATCCACATCATCCCAGAGCTGAAGAAGACGCTGC[A/G]GGCCGTGGATCAGGAGAGGATGATGCAGAGAGGGAATAGAGTGAAAACCG
IWB22569	chr1B	4.32072	A/G	IWB22569,CCCAGGAGATGCCCGGCGTCTTGGTCCTCCTTCCAGGCCTGCCTCAGCAC[T/C]GTGGAGACCCTTTGCGCGTGGTTGTTTCCCTGGTCTCTCCGGATCGCGCC
IWB10856	chr1B	1.7799	A/G	IWB10856,TCTACAATAGTTCTTGCAGAAGCCAAACAAGCTATACCAACAAGAGAGCC[A/G]GATCCACGAGGAATCCGAGTGCGCGGCATTTGTCGCCACTGGAACCGGTC
IWB56433	chr1A	3.25787	T/C	IWB56433,CTTGAGAAGCAATCAAATGAAATGAAACGAAAGGAAGCATGGCGTGTTTA[T/C]ggtgccctgctgtgtgctgcaggcaaatgcttgtatgagcggcttaagtt
IWB34707	chr1B	3.56313	A/G	IWB34707,ATGGCTCGCTCACCACCAGAGGAGATGGAAACGGAGGCGGCGAGATCAGAAAAGATAGCGATTGAGCGCCTCGTCCTGAAAGC[A/G]CCGCGGGGAGACGCGAAATGCGCCGACGAAACATGCTATACTGGTTTTTGCTTCG
IWB6479	chr1D	2.4705	T/G	IWB6479,TCCCCTTATGGGAATGGAAAATCTGCTGCGCGAATTCAAGATCATCTCCG[T/G]ccaaatggtgcacacagatggcataactacgcaaagagcccaaatgagat
1499751_1bs_1420	chr1B	3.19998	C/T	1499751_1bs_1420,taacccgtcccttgatctcacacacctttcaattgaacagatctatcgatCgagaggatggggagggcgccttgctgcgagaaggtggggctgaagcgagg
IWB31869	chr1D	2.22848	T/C	IWB31869,CTACACAGTCCTTCCTCTTGGATTTATAGATTCATTTCTATCATTCAAAA[T/C]CAGGTRCATACACACAAGAGTTCCTTTTCTGTGAGAARGTCA
IWB72690	chr1D	2.4702	T/C	IWB72690,TCTTCTTTTGTAGGCTTGCATCCACAGCGATCACGTCTAGATGTTAAGTC[T/C]GAAAATTTGGTGTATGTATAGTGCAGAACTGCAGCCTCTTCCAGCTTGAT
3456068_1bs_4070	chr1B	5.14179	T/G	3456068_1bs_4070,gtatgccgtgccaccaaacacaacacaccaaaaaattagttcgataagcaTtgaatcactttaaaaaaggaaagcagtgatgaaaagaaacctagccatgg
IWB11290	chr1B	4.34957	T/C	IWB11290,gagaggcggctattgctgaaacagccagtggcaactcgagaataatggcc[A/G]CCGGTGTTTGCGGCCAGTCTGCTGATGCACTTAGCTTCATCTGCGAGGGA
IWB7109	chr1B	5.17609	A/G	IWB7109,GACCGTTCCGGCAATGTGCGACGTGCATGTTCCACCATACTGCTACACCA[T/C]CATATCATCATCGAGTGACGTCACTACCGGAATGGGCGGCTACTGAGAAG
IWB36466	chr1B	5.15982	A/G	IWB36466,TCACTAATGACCACCTTCTTCTTCGGACGGTCACCTCTGTCAGTCTCAGA[T/C]GACTCTATCATCCTTACGATATCCATGCCTTCAAGAACCTGGCCAAAGAC
IWB9761	chr4B	187.359	T/C	IWB9761,TGGTGTCTTGCCCTCGATCTTGTAATGTAGTGGTGCACAAGCTAGCTACT[T/C]ACGGAGCTAAACTAGGAGCTAGCTTATGTAAAGCTTGGCTTGGGCAGGTC
IWB7076	chr1B	8.5597	T/C	IWB7076,TCGATGCCGTGAGAAAAGGAGTGGCCGAGCACCACAACACCATCAACCTC[A/G]TCATCAACGGTATCGAGGACGAAGAGGAGTATGTCCAGGAGGCTGGAGAT
IWB31195	chr1D	3.9583	T/C	IWB31195,GCAACATCATTTCCACCCATGGCGCACCTGCTTACAGACCAGAGCGCGTG[T/C]GAATACAGGGTCGTCGTCGACGGTAACCTTATCACGAGCAGAGCGCCAGG
IWB44730	chr1D	0.085456	T/C	IWB44730,AAGGTACCCTGTGCCAATTGTTGTTGTTGAGGTTGTTGCCCGAGTTGCTG[T/C]TGCGACTGCTGTTGGGGTTGGGAAACACATTGGCCCAACTGTTGGGGTTG
3467701_1bs_4963	chr1B	6.47384	T/C	3467701_1bs_4963,aggtggctctggaaggtttgaggcccatctttgctgacccggcccgtttgTaaggcccggcccaccaatgtccgttttcctttgcaatgatgatgctaatt
IWB59696	chr1B	22.7031	T/C	IWB59696,CTGCAAGAGGAACCCATTGGGTGCTCTGATCCTCATCCTATTCTTGTCGA[T/C]GTTGTTGCGCACCAGCTGGAACGTCTCCGATTGACCCGGTGTGGAGGCCG
IWB58616	chr1B	7.41491	T/C	IWB58616,GATCGTGCTCGCAGTCGTGGACAATCACAAGGACTTGGTGATATTGATGA[T/C]gatcacggggctgttgagtatcctcgtgatataggtatgacgaagagggc
IWB12632	chr1B	5.6947	T/C	IWB12632,GGCATCGACATGCTTGTGAGGGCCACTTCTTCCGTGCTGTTACTGTGCTG[T/C]tggttctgggtgctgctgatcaggggcaagctcgtgaagtgcacctgtgt
3467701_1bs_4979	chr1B	6.47382	A/G	3467701_1bs_4979,tttgaggcccatctttgctgacccggcccgtttgtaaggcccggcccaccAatgtccgttttcctttgcaatgatgatgctaattggattctactaaaaag
IWB9566	chr1B	8.55935	T/C	IWB9566,CCATAGAAATCACGGTTTGCAGGCTAGAGCAGGAAGATGTGCGGATCCTC[A/G]CGTCGATGCATCCATTGAAGTGCCTCGTTCTTGGTTTGCACTTCGTTCCA
3425307_1bs_4523	chr1B	6.79793	A/C	3425307_1bs_4523,acttctccatctgcccacctccctcaagtagttgcagaaatgtggcatccAtgccgaaagagccataagcgtacaactctctccaactgcttcaaattgac
IWB26242	chr1D	4.82241	T/C	IWB26242,GTGGTGGCCACAGCCTCCACAGCGGGGCAGTCGGAGACGTTCCAGCTGGT[A/G]CGCAACGACGCTGACAAGGATAGAATGAGGATCAGAGCACCCAATGGGTC
3467701_1bs_4676	chr1B	6.47412	G/A	3467701_1bs_4676,cggagcacgcggcctccaggaaagactgcaccttgctccgagctgcagcgGcggacggaccagattgagattggggggagatctctttgcttacgaaggag
3424156_1bs_615	chr1B	7.3681	C/A	3424156_1bs_615,gtttgtccggtaaaggcgaggaagaaactgaagatgcagagcaattagtcCtgattcgctgtcacagatttgggctgtttgagaagtgggaggttgatgtt
3467701_1bs_4950	chr1B	6.47385	C/T	3467701_1bs_4950,gaggaagtagaccaggtggctctggaaggtttgaggcccatctttgctgaCccggcccgtttgtaaggcccggcccaccaatgtccgttttcctttgcaat
3465312_1bs_700	chr1B	6.76393	T/C	3465312_1bs_700,agaacaacctcgtggtccaaactaacgtcacatggaaaactatactcccaTgtgacattaaaacagttaatggagaataacttgtacaaacatgttggcat
IWB7419	chr1B	7.47914	A/G	IWB7419,CTGAACATCAATTGAACATATGTTCAGAGGGCGTGGACAGTGAGATGCCT[A/G]AGATTACTGTACTGCTTGAAGGCGAAGTAGATTGAAAATGATTTTCAGAG
IWB66045	chr1B	7.99524	T/C	IWB66045,GGC[A/G]AtCTctTTGTTgACGAAATCGATGTTCTGCTGCACATTGGATTTGTCCAA
3433128_1bs_4356	chr1B	9.9351	G/A	3433128_1bs_4356,tgggtcgtgccttgcgactcgggttggtccatggaagatgcagctgctgcGtggagtagtgatcataggattagcttccaaacatccttgcctagcggtag
3285535_1bs_1678	chr5B	362.356	G/A	3285535_1bs_1678,ccttccgcttcgaaggccttcccagcgtaggcgccactttcttgcgactcGcctcaggtgcagcgtggcgcaccgatcgcctcccctttagagcataagat
3426638_1bs_9201	chr1B	44.0763	C/T	3426638_1bs_9201,gcggcgaactgcagtgtgcgcggaggcagaggacacaagaaagtagtgtgCgcgccattgcagcgtcagtgcagtaggaggacgacagagaataggcgaag
3434667_1bs_721	chr1B	48.4043	C/T	3434667_1bs_721,caatgtgtgtacaccatacgtactacaattttagtaggtccatgaggaggCtggggtttacatgatgggcttcgaacacgcatcagacactggttgatggg
3463636_1bs_17769	chr1B	44.6167	C/T	3463636_1bs_17769,cagccgaaagcacttgcgtactcagagtatttacagccgggcacctcaaaCccgcctcatacgtctggccgggtcacctgatcactgtcctgtcgcgattt
IWB11695	chr1B	46.2611	T/G	IWB11695,AAGTATATATATTTGACAGACAAAGACATCGACAAACAAGACCACAAGTT[A/C]CATCTGCAGGGTGGTCGCGATCGCGGAGTGCCGAAACAAGAATTATCATA
3463234_1bs_452	chr1B	45.3755	C/G	3463234_1bs_452,accggggtcaatgattctgcaggtcaacacggcctcctgccttctttctcCatcatcgttctccctagcccggttctaagcaatgtttcctctttctgtga
IWA7703	chr1B	46.8288	T/G	IWA7703,GCCATGCGGTAACTGATGCTGGGATGCGCTTCATTGCGCACAGCCCATGCTTGAGTAATCTCGCACTTCGGATGTGTCATAACGTTACTGATGTCGGAGT[T/G]GCTGAACTGGGACGTGTACATAAGTTAGAGTCTTTGGTCATTGAGTATTGTGGTGAGATCTCTCTGGAAGCTGCGCAGGGTGTTGCCAAGTCGGTTCACT
3425211_1bs_2058	chr1B	46.2255	G/C	3425211_1bs_2058,tctctgctctcatgatgggtttcgactggctgtcccctgacatctcctgaGccctgacagtttcattgccgtgatcgatctagggtgccgtggacgcgtat
IWB29515	chr1B	44.9337	T/C	IWB29515,GTCAGCTTCTTCCTCAACCTAGAGCTCCATCCCCACAGTCATGGTCCGCG[T/C]GGCTACTCTGACCCCGATGCCATGGAAGGTCCCCTCCCATCTCTCGCCCA
IWB9942	chr1B	47.6249	T/C	IWB9942,CAACTTTTATGTCGCATGTTTTGTTCTAGCCTGGCGAGTTTCGATTTTCT[T/C]GAAGAAAGGATCTACTTCGCTCAGTGATGGAATGTTTTGTGGTCTAGTCA
3445330_1bs_6018	chr1B	49.6133	A/G	3445330_1bs_6018,ctgatttactcgtttgaaagtagcctccaactgtccggaggttgtgaactAtacacacctgcagctatagcgcaattcagctcgaaaccggagcaacacag
IWB63847	chr1B	46.8844	T/C	IWB63847,GCATGCCGCCGTGTTCTGTTAGTTTTGCCCGTGTGAATGTGTACTCTACC[A/G]TAGTTGTTTGTACTATTACACTGGGCATTCTGGGTCCTTGTCTTTCTTTT
IWB9236	chr1A	29.6112	A/C	IWB9236,CATCGATAAATAATCAACCTAAGCATAATAGCTTAAATTAAATATCTGTC[T/G]ATAGCAAGCACAGAAGAAAGGTAAACTCGTGACATGCAAAATTAAGATGT
IWB33538	chr1B	47.6362	T/C	IWB33538,ACGCCTGTCTGGTTCTAAACCTGTAGTTTCGTGACTCGATCATCATCAGT[T/C]ATAACCGGGCTGTCTGCARTGTGCTTGTRTGGATCTTATTGC
Barc08		NA
IWB11525	chr1B	50.7779	A/G	IWB11525,GCGTGCGGCAAGCCTGTCCACGAGGTGATCAAGGAGCTGACAGATGGGGG[T/C]GTCGACTACAGTTTCGAGTGCAGTGGCAACGTTGATGTGCTTCGAGAGGC
3472190_1bs_2695	chr1B	51.8924	C/T	3472190_1bs_2695,cctcttgcaccggcgtgtcaggtgtgtgcaacggatgtggacacattcctCggagaagacaatcctcggagaagacaatcctttcctagttcaggtgacgg
3482953_1bs_31972	chr1B	52.6715	G/A	3482953_1bs_31972,gttgcggagcgacactcaccacgcatggctcatgcctcgtgaagctcttcGattgccttggtgatgaattcttgcgcgcctggcacctcatgccttgcgcc
3463512_1bs_2221	chr1B	51.0173	G/T	3463512_1bs_2221,caacccgcaaaagcgattttgtgtgaactacaaacgcgttttgtgggccgGctgaatgcgggatctgctaaagttgctcttagcaagcgctacggggagtg
IWB53510	chr1A	34.1632	T/C	IWB53510,tcatcatctgtgatacctgtttcaaataatggtaagcgcaaggatatatc[A/G]TTGGCATCAGTTTGATGCCTCCTAGAAGCCCTTCGACTATCGAATTCACC
3439163_1bs_7165	chr1B	61.5093	C/T	3439163_1bs_7165,tagtgtactgcagtccgagcaacttgagaaatgctttctgttgcatagggCtggacattttttgatcctgcaggtgtaccaaacttctgtgatctatagca
3437771_1bs_2316	chr1B	61.2346	G/A	3437771_1bs_2316,aagacgcggcggtggagtcgcatattaagaggaggagaagggttataactGgttctggtgcggcatggggctgcagtcggtggagaataacaggaggtgtg
IWB22143	chr1B	65.5476	A/G	IWB22143,CCCAATGAGGCGGCATTCTGGCCCTCCAAAGGTGGAGAGCATGGTGAAGG[A/G]CATCGCTGAGACGCCGCAGCCAGAGGCCCTGGCGATCAGTGGTTGAAACA
3477178_1bs_518	chr1B	64.9934	G/T	3477178_1bs_518,gcggtgcttatgctaggaaagtgaacgtaggcgccggtcgttggataataGtacatgattctcagtggcgtatgggtatagttgtcatacttgatagctaa
IWA2998	chr1B	63.0542	A/G	IWA2998,TTCCCGGTTTTTCGCCTGAGGTCTAGAACTGGAACCTGCTCGGCCGGGACTTGGTCATCCTGGCCATGCCGTACGACTCGTCGTTGTCGTCCCTCTTGGC[A/G]TTGCGGAACGCGGCGCAGCCAGCGACGTAGACGATGATGAGGATGATGAGCACAACGATGTTGATGATGGCCACCTTGCGCCAGCTCTTCTTGATGCCGG
3450409_1bs_1403	chr1B	67.6878	G/A	3450409_1bs_1403,gggatcagccgatcatggtatggcagtatagctgcaatggcatgtacactGgcggtgtgtgctgccgccgcagccgccaaggaggagatatgtatgtcact
3472157_1bs_1300	chr1B	68.5816	T/C	3472157_1bs_1300,gttctagtacggtgcatgtcggtgtcggcgtcgtggaggcagctctgcctTggcttcggctgctaagaccttaagggcattgcggttgcggttgcgttgga
3432579_1bs_4957	chr1B	68.443	G/A	3432579_1bs_4957,ggaacgtcaagaccattgctgagtgccttgctgatgagctgatcaatattGctcaaggatcgcccgatcagtcgactggccattcttctccagaagctgca
115684_1bs_1827	chr1B	69.9086	T/C	115684_1bs_1827,atcgtggggcagcgggaaacgcggttaccgggcggtaaccgaatttaccaTccggtacccaaaaccatggcccaagcccactacacaccaaatatacacaa
3484297_1bs_5110	chr1B	70.0122	G/A	3484297_1bs_5110,tgttgttgtggccaatagaagtacatttcgtttgatcatggcacagtacaGtacattaaacatggcaactgctgttcattaaacatggcaactgcagttca
IWB23293	chr1B	69.5391	A/G	IWB23293,GAAACATATCCGCCGTGGGCTCATGGTCCCGGATACATAATTTCAAGGGA[T/C]GTTGCTAAATTTGTGGTTCAAGGTCACCAAGAACGAAAACTTCAGCTATT
3415982_1bs_4420	chr1B	74.8945	A/G	3415982_1bs_4420,ccttatgcaaacaacccccatagtgacatttagaaattttctttgtggacAggaatataccattgggatcaaccagtttcatttttaacatattcaacatg
3433553_1bs_704	chr1B	73.1304	G/T	3433553_1bs_704,ccactggaccgccgttgcagatccactggactgcggttccatctcttgtgGcaatggttgcagctctccttgcatggctgcggcacgccatgccggcggcc
3484808_1bs_6880	chr7B	696.647	T/C	3484808_1bs_6880,ccgagtggtttttgtaactggtaaactttaacaggcttggtgcctgagcaTttctggatccgtcggacgcaatctgaacttgtgtttgccgttgaatatgt
3447383_1bs_2199	chr1B	79.7186	T/C	3447383_1bs_2199,aagtttaaatactgcaggggtctcccaacttagcccatcacaagctctcaTgatcagcgaaggatattcgttctcccgggaagacgctatcagactcgcaa
3479603_1bs_2652	chr1B	71.183	A/C	3479603_1bs_2652,catttccagacgaatcttgggatgtcatcgccacagatttcatggatagtAttcctcaaccaggtcagttcaattgactcctcgtggttctggacaaacgc
3471223_1bs_1508	chr1B	75.7792	C/T	3471223_1bs_1508,ttcaatgagcggctccctggctccgtcggacgtgaacaacacttcacttcCggccgccacctctcctcgcgctacggatgacaccaaggtggggtcccgaa
3444917_1bs_6245	chr1B	78.9701	C/T	3444917_1bs_6245,tttttttctgtcataattatgacacttctatgacgataattgtgagaaaaCccggtatcatcatagatgtggtggggtcctacttctatgacaaaaaatca
3472828_1bs_7486	chr1B	75.5207	A/G	3472828_1bs_7486,cagttggcgcgctctgggcgcgcccaatgctcgcccaccaactgctcggcAaaatgccatggcactccagagcgcttgggcaaggttggcaagcaacatga
IWB46756	chr1B	70.3279	A/G	IWB46756,ctgactgatgatgaaaatggcaatggaagggttcccatggacatcagccg[T/C]GCCCCTCAGATGTCCGGAGGTTTTAACAGCACTTTAGTTCTTCCTGGACC
3483782_1bs_4731	chr5B	191.552	A/G	3483782_1bs_4731,caggtgaacttggctgacctgaagaaggcacttgatacggccaaggagacAcggtctgaaagcagggatgcgcgggaggagcttcgtatggctagagaaat
3448083_1bs_125	chr1B	77.8241	C/G	3448083_1bs_125,tatctatggagatactagcaacaagagagaggggagtgcatctacataccCttgtagatcgctgagcggaagcgttcaagagaacggggttgaaggagtcg
3413894_1bs_710	chr1B	80.3732	C/T	3413894_1bs_710,aggtgtgatctcccaaacatcatccgatgacagatctaagtcatgctcgtCgtgactgttcggcgcacttgacatgggctcaaatccatcgaagatcatgt
3443562_1bs_548	chr1B	75.7598	C/T	3443562_1bs_548,acatacctcaagctcaagatgccaggaccacgcggggtcataacagtcaaCgaaaacatggaccgctctctccaaacagaagagcgtactgcagccctcgc
3433892_1bs_6562	chr1B	79.835	T/A	3433892_1bs_6562,attcattgtcgtgtgtgaggctttcctccatatcacccctcacttcggacTgtgtcttagaaccttcaaggtggagccgaagatgatcgagaggcagcacg
3481891_1bs_4572	chr1B	76.0301	C/T	3481891_1bs_4572,cgcacgattgcgcgcggtaccaccgttagatcttcctcccgtaggtacgcCgtcttcctcctccgcgttcgcatccccccctcctcacctgcaactccccc
IWB7004	chr1B	77.7212	T/C	IWB7004,TAGCACAAACTTAGCACGCAAATGCTACTGTCGCTATTTGCAGTAGCCCT[T/C]TATTTAAACTTTGCATGTTATACTCTCAAGTAACGGCAGTTGATGCTATG
3478783_1bs_1877	chr2B	204.185	T/G	3478783_1bs_1877,tgttggacttggcaggatcagcaacaagcatatccgtagtaatcttctcgTgcacaatgcaaagacgagcaccaatgcgctgcaggtcagcaatagtagtt
3462596_1bs_4848	chr1B	71.4279	T/C	3462596_1bs_4848,cactggtctcgctttcttgcccttcttacaaaggggccgcctgtcggactTtgaaaccactgaaggttccggtgcggagtccggcctagggccggacttag
3415982_1bs_4190	chr1B	74.8947	C/G	3415982_1bs_4190,cgtggtgtgcagttaaagagtataggcgtaggattatagctatatataaaCatgtataaagaaaaacgaataatagtcgtttatttaaaagctcacctttt
3478234_1bs_3612	chr1B	71.2131	G/T	3478234_1bs_3612,agggcgagaaggtctccaacaacatagcagaatcgagggcctcatagcagGcttgaaagctgcagcagcagtgggggtgaagtgactcatcatcaagggct
3420736_1bs_1290	chr1B	81.4457	C/T	3420736_1bs_1290,tgtttcttcctcggcaggaacttccacaacgacactagctgcagctgctcCggctctcactcatgctgcggcactgttcttgctgtcggccctgctgctgc
3463216_1bs_7974	chr4A	447.795	C/T	3463216_1bs_7974,tcgtggtatccgacgcctaggttttccgcacctggtatggcaccgccaccCggaccgctgccccggccgactcggcccctcttctccatggccgagttcca
3476528_1bs_1574	chr1B	82.6577	A/G	3476528_1bs_1574,tgaagcctggttcaggggatactaagggagtcctggatttgggggtatccAgacagccggactgtgtacaacgtccggacaattgaagcgtgaagatacaa
3453856_1bs_1369	chr1B	82.7267	C/T	3453856_1bs_1369,ctgtcctccagttgcttcttcacgcggccgagctccccctcggcccgctcCagattttgcttcagtccaaagacttctgcagtatgagcggccgcagctag
3423780_1bs_777	chr2B	146.433	A/G	3423780_1bs_777,tgtggtagtggcagatgaggacatgatggcgcacgcacaattgggcaacgAcaaccttctgatctatgccgggactaccggcggtgtactggagtcgatgc
3452512_1bs_1148	chr1B	82.004	T/C	3452512_1bs_1148,ttcaaaccagagaaattgcactggccagaccgttgtagcacttggttcttTggggctgctggaacattggaccctgaaacagggaagtgctactggacgga
IWB8726	chr1B	82.3109	T/C	IWB8726,GTAGATGATGGGTGACGGGCCCTTTTTTAACTTCTGTATGGCACCGGCAC[T/C]GGTACGTCCCCGCCTTTGTATTTCTTCTTCCTTCGGAGCATTCCATCGGT
3421327_1bs_1783	chr1B	82.1758	T/A	3421327_1bs_1783,ttggtatacggtggtcagaaatatgcatggatgagtaataatgacaagacTccggtcacagttacctgggaagccggagataaaccggggtagtcagccgt
3453096_1bs_11084	chr1B	82.7602	A/G	3453096_1bs_11084,tcgacccgtcgctccaattgacctcttcctcactggtagtcctgcagtctAtgttgatcgcctaagtctatgctagagtagctactggttctccaccctgg
IWB10008	chr1B	84.9637	A/C	IWB10008,TAAAGGAAGGGCACAGTTTAGGATCTAAATAGCGACATTAGTGTTGTACC[A/C]GACGATAGCTAGTTGTGTGCAAATGAAACAATATCGACAGACGCGGCATT
188028_1bs_1777	chr1B	84.9491	G/A	188028_1bs_1777,ataattggctagagggttgccggtacctatcgtaccaccacgccgccactGagtcgtcgtcctcggctgggttgcctagctccagggactgggtcaatgcg
3452735_1bs_2490	chr1B	85.0113	T/C	3452735_1bs_2490,cgccaaattcatggcggtcccccactatacgtatctgaagatgaagatgaTgggtccgaagggcctcatcaccgtcaccggcaactactgcaagtccctgg
3436379_1bs_10849	chr7D	1.84923	A/G	3436379_1bs_10849,gaaccttttttcagaattcgtggtttttttctgaatttctttttcaaataAttaactcttggtctataatatatctgtagaggaagggttaaatgtaactt
IWB10318	chr4B	570.893	A/G	IWB10318,CAAATACATACCATACATTGAGCAAGATTTGGTTGCCTGAAAAAGGAAAA[A/G]TACGTCTCTTTGTGTAATTGTGGTAATCAATTTTAATCTTTCTTGCTTTT
3436379_1bs_12311	chr1B	85.2887	C/T	3436379_1bs_12311,tagttgcatctcgaggccccaaaatacaatcataaaaacctcctctgcccCgtccatccgcactcgttctctcgaaacaccaaaatccaagatgcttagaa
3476675_1bs_10439	chr1B	85.4372	T/C	3476675_1bs_10439,ttttttatattatttatttatttcgaaaaggagaaagtgccaccggcgtcTgcgttccagaaactgctagtagtacaaacatcgcatcgcatctcctcgtt
3441118_1bs_7041	chr6D	15.9472	G/A	3441118_1bs_7041,acggcggtggcctctgcaaaagtagaagaagaaaaagatgtcaacaatccGcaaagaagaaatacagttgccggggagatccggcccgactgctcagtagt
3484451_1bs_928	chr2B	153.148	A/T	3484451_1bs_928,ttcttgcgaagcgcacaatgtcttttattcttaggcgaacacaaggttgcAgctaagcctccgagtggaagacaggcttaccactcggtaggattttcaaa
3458709_1bs_9159	chr1B	86.9512	G/A	3458709_1bs_9159,atctctgttggtaatgctgcaggcttgtggtggcgacgctgacagtcgtcGagaggttcatggactggatggtgtcgtggctgccgatggattccttcgtc
3478293_1bs_410	chr1B	89.3512	T/C	3478293_1bs_410,accgcaaacattcgacgaaggtaccggcaacggtactgctatatgtttaaTggttgggctatcaaacggacttcgaatgcgatgaaatttggaaggcggta
3417670_1bs_1370	chr1B	89.9999	A/G	3417670_1bs_1370,gcccatcagtgcgtctagctgaagatccggaagccaagacagcgtgatccAgagcgccatctcagcactggcccaggcggtagaaacgcgccagtcgctaa
IWB65786	chr1B	87.733	T/G	IWB65786,ATAGGAGTACATAtGATGCTTCAACGTCTTAACTTAGTTTAACTGTTAcA[T/G]CAT
3470998_1bs_1032	chr1B	87.2252	T/G	3470998_1bs_1032,atggatagtacaatgaaagagtatgagcaccgacgactagaatagtgtgtTaacatgaatgtaaagtcggtgggaaatacgtactcccccaagcttaggct
3476616_1bs_8520	chr1B	89.0165	G/T	3476616_1bs_8520,gcgcctcgatgatatctatccaatggcgtatgatttgcttcgttccgacgGgcagtttagaaagaaacgcgcaaaaacgctcgctaccactcgtcatccgc
3472635_1bs_5012	chr1B	86.8086	C/T	3472635_1bs_5012,aatcagacggctgaaagtggaccggccgaatgattaggccggtgcgccggCgcctattagtcgccaacgttttatgcatcaaaggtgcttaaaggtcgccg
3417670_1bs_1573	chr1B	89.9997	G/C	3417670_1bs_1573,acagccgctccatctgcgtccccaagacccgcaggcgggcctcagcagcgGcgatgatccccgggaaggtccaggccgtcagcggtgttggaaatatgacc
3453184_1bs_3207	chr1B	87.9672	G/A	3453184_1bs_3207,aattacacaacgatgccttcataaaggtaatgacgcagaacgccaccatcGcctaccattggctcggttttcaccagcaactatgtcttctcgactcgcag
IWB69726	chr1B	86.8058	T/C	IWB69726,AAAGAATAACTAGCCCATGTGAATGCACGGGTTGGCAACTACTATACGTG[T/C]aatcaatgatcgacttataggaaagaaaaagaacgtacagcacatgtctt
3417670_1bs_1305	chr1B	89.9999	T/C	3417670_1bs_1305,tagctggcccaggaggcgatccggccggcttgctcctgcagcaactgctcTgaaccagcgcgctggcccatcagtgcgtctagctgaagatccggaagcca
3417670_1bs_1605	chr1B	89.9996	C/A	3417670_1bs_1605,aggcgggcctcagcagcggcgatgatccccgggaaggtccaggccgtcagCggtgttggaaatatgacctagaggcaataataaattagttattattctat
3484376_1bs_2111	chr1B	89.6448	T/C	3484376_1bs_2111,ggaaccacctttcctccctcgaccccccatcccctggtgcgcctcaaagaTaaccataatggccatcatgagcgcttgaaactgcagccattaacacatct
3453184_1bs_8753	chr1B	87.9728	C/T	3453184_1bs_8753,gagaatccctgatgagtgttgaagtaccgcagtttttctttcctaggcggCaacagactcattgcacagaataaaagttcacggtagtattcttgttctaa
3458709_1bs_9342	chr1B	86.9514	G/A	3458709_1bs_9342,actcaaggcgtcggccgccgtcggtcaagtgtggctcgcgaggctgctcgGtgtgtttcgccgcagctgtaggccacgtgatcaggccgggcaggcttcgc
3458974_1bs_5546	chr1B	87.7335	G/A	3458974_1bs_5546,gaacggcggcggcgtgaacgtgaaccctgcgtgatccaagctccctgtggGggaggacatggcgatcgacggaaggagcagcgagattttttcgagagtag
IWB7321	chr1B	87.7333	A/G	IWB7321,ctcctcaactactctcatatattggcgtctccgactacaggtgcgatccc[T/C]GCGCGGAGATACGACTGGCAGGCGAGCGCCGATCTGAACACCTTTCAGCA
3458682_1bs_4026	chr4B	472.502	T/C	3458682_1bs_4026,ctccgcctgcagccaaagcatatcatattaacattatgctcctcttgataTttcataaacatatgaggaaaaaaagcacatactctgtgactcgtcaagcc
3424686_1bs_2601	chr1B	91.8806	C/T	3424686_1bs_2601,tgagctgcagaatggccggtatagtcatcagttcctgaagctaaaagttgCtgtcgcttcatcagaccaatactaggatcatctggtacatttaccttggc
3442985_1bs_1519	chr1B	93.7863	C/T	3442985_1bs_1519,gctcctcactaactccaagctgcaagcagggcggggccgtggacgctgtcCggggaggagctagggccgcggtcgggacgacgcggggcggagctacggcc
3483953_1bs_1095	chr1B	118.797	C/A	3483953_1bs_1095,cactagctgcagctgctccggctctcgctcacgctgcggctctattcttgCtgtcggtcgcgctgctgcactgctcttgctttcgttcgtgctgctgctct
1265003_1bs_5913	chr1B	105.108	T/C	1265003_1bs_5913,gggaagcaaaaattcaaaatgaactattgctatccctaaaaaacactcccTctgttcacaaatatatgatgttttaaatatttcgatatggactacatacg
33260_1bs_3059	chr1B	118.478	T/C	33260_1bs_3059,gctactagtccctcaatgagccttcgtgtgctcctcggtgagcactctttTccccctctatttctgccaagtttctgtcaaatttttggcttagggagaac
3436443_1bs_4052	chr1B	97.7891	A/C	3436443_1bs_4052,gcggcagcacaccctcgtcctgttggaaatatgccctagaggcaataataAaatggttattattatatttccttgttcatgataattgt
3466711_1bs_2013	chr1B	101.628	C/T	3466711_1bs_2013,ccaggttcaccactcagtaggatttttattgtttctcattgtatttgtgcCgtagcttgaaagagaaggtggcagtcgacctgcaccttgtcgcccttccg
702689_1bs_404	chr1B	108.434	G/A	702689_1bs_404,gccgagggtgttattttggtggcagagcctccgagtacatcagatggttcGgaatttggggttgtgtttcgagccggtctggtgttgtcggtctccccttc
3435165_1bs_6882	chr1B	98.5135	C/A	3435165_1bs_6882,ggcgacaggtccggctgcttgcgggccatggccacaacccggtcaaggatCtttttctctgcaacaatcacaagggactcagccagccgactgctcgctgc
3430061_1bs_9202	chr1B	121.4	C/T	3430061_1bs_9202,ggtactgcagaggatctcaacccccgtcgaggacggcatcgactgtgcagCctgtagccctgtactctctgccagcgccgtccagcttgg
3464029_1bs_1775	chr4B	11.0009	A/G	3464029_1bs_1775,cctccagcaaattatccggtgcctccggttggacggaggtcaccggtgtcAcagtctcgcccttcttatgaagggccgcctgctggactccggaaccactg
3482982_1bs_1325	chr4B	380.684	C/T	3482982_1bs_1325,cgagctcacacagagcgtcaactgcaaaacaaaaagcccaaaagccacaaCcggccggcacaataaaagataggtaaaccaattgtctatcctattacatg
3433582_1bs_7401	chr5A	287.763	A/G	3433582_1bs_7401,ggcgcagcagagagctccgggacggtggcgacacggcggcgggagcagcaAggcgagcaaaggggaagacatcctcgtggaagaggacgtggcgcgaggtc
IWB4598	chr1B	122.345	A/G	IWB4598,TGCTGCAAGATGGCACTAACCCAGGAAAGAATTTTTTATATTTAAAATCA[T/C]GAAGAATCATAGCAACTATTTTTCTTTCGTAGCCCGGAAAATCCTGTAGC
3479103_1bs_365	chr1B	123.713	C/G	3479103_1bs_365,atgatgaacaagggttctatacttgtactattacacatggtaaagaaagaCgcgacaaacattctggttgttgaacaaggtgaagtggaatggccctattg
IWB6324	chr1B	123.35	T/C	IWB6324,CCAGGCAGGTTGATCATCAAATTGATCATGGACCGGAATTTTGATGATTT[T/C]CTGCCCATCCCATACATTTGTCACTGGATCAATCAGCTCTTGTACTCTTG
401642_1bs_3805	chr1B	122.726	G/C	401642_1bs_3805,cactgcttcagcgtttggcatctgaaccggtggtgtgtcttgtgcagttgGatgccttgccactagctgctccggggcagacgatgacatggcccgtacgg
3482464_1bs_1751	chr1B	122.469	G/A	3482464_1bs_1751,tccattaagagggcccaaacctgggtaaacatcgtgttccctgcctccttGttaccttcgatccttagatgcacagtccgggaccccctacccgagatcta
3474422_1bs_595	chr1B	122.245	C/T	3474422_1bs_595,cggcttgcacagaaggatgcactcgcgcacacccagcacacaacacacacCagcacacgtgtacaccggcatcgctgccggttgagatggactttaaggca
1491348_1bs_4010	chr1B	123.967	G/A	1491348_1bs_4010,ctgataagttccatctcatggaagatgtgcgcctacctgataacgctcagGgtgcagtgtctacaagctctcaggaatgtgaggtggtttgtctgaatagt
IWB60394	chr1A	97.8093	A/G	IWB60394,ATAGTTTGTGCAGCGGTGCGAGCACAAGAGACGACATTAGGCATGCATCC[A/G]CCATCAACCTCCTGGACTCCCTGGGTGGTGGGTGGCGGTCGTGAGGAGCT
IWB10448	chr1B	130.349	T/C	IWB10448,CTTGCCTTGTAGACCCAATTATGTCTTTCATGAAGTTGGCAATCCATGTG[T/C]AAATGCCTCCATGTGCACCTCCATGTACATAAACTGGTTAGTGTATGCAT
IWB46929	chr1B	130.017	T/C	IWB46929,ACCATGCCATGGTGGAGTGAGGTCGGGAGGCGATAGTGATGAGCAATGTG[A/G]CGACGGAGGGCATGTGACAAATAGCGATGATGCTGGCTACTTCTCATGGA
3482607_1bs_4041	chr1B	130.011	T/C	3482607_1bs_4041,gctggtcagctagagccaatgtagcagtggcattctcaacatcaagacttTtgcaaaggatgctctcacacataaccttcatcctttccatcgcataccta
IWB42212	chr1D	79.1336	T/C	IWB42212,cagttcacattgtgcgcatgcagttcaagaaccatataatcctggctttg[A/G]TACAAAAGCGCTTGGAACAGATTGCATTCACCGGACAGTACCATTACTTT
IWB58317	chr1B	130.348	A/G	IWB58317,ACAGATTGCACTCACCGGACAGTACCGTTACTTTTATGGCCATTGCAGTG[A/G]CAGAAGACAACCTGAACTAACCACAACTTCTGCACATACTTTTGCTTCCA
3444899_1bs_468	chr1B	132.344	A/G	3444899_1bs_468,gagaaggtggccaagcagcccaaagttgttcctcccaaggcccggaagacAttgttgcgaattaagatggacgtccttgttgcttcggggtgagtatctca
IWB7545	chr1B	130.018	T/C	IWB7545,CTCCCCCTTGTGCTGGATTAAAAATTTAGACTAGGAGAAATACAGGAGCA[T/C]GTCTGAAGGTATAGCTCTGCTTTGTGATGGATTATTGAAGTGTGAACCCT
IWB22289	chr2B	697.436	A/C	IWB22289,CTCTCTGTAGAGTTAACTACCCGTGGAGGTTTGAGGAAGAGCTCGCTGGG[A/C]AAATTCGTTGGTGGGCTCAGTCGGCGAACGACAGAGACACTCCGGCAAGG
3478372_1bs_13484	chr1B	132.423	A/G	3478372_1bs_13484,gcctcgttgctagaggcacgatcaggctgaggctggccggtcgctccaccAtctagcacggtgtcttcaccatcctcctcctcttcctcttcgccctcatc
3436028_1bs_297	chr1B	135.234	C/T	3436028_1bs_297,tccgccactgtgatggcgtctgtcaccatgttgccgaggcacataggaccCactcctcggggaaggcatggggactcgacgatggtcatcgtggtcgagtc
3449072_1bs_3401	chr1B	133.483	A/G	3449072_1bs_3401,agctgcagttgtccaaaatgtcatctggcacttgacctgagatggcaacaAcagttgagtatccatgacaactgtagttgtccgacatgacaactgtagtt
3457515_1bs_1142	chr4D	124.793	G/A	3457515_1bs_1142,cggatacagccgatgggtcccagctgtcagggggaggaaacattttttcaGcttaataaggaggaactttccttgcgtgcgaccatggacctcatgggttc
3429744_1bs_7002	chr1B	132.405	C/T	3429744_1bs_7002,ctaaggtagcgagcgagctggctcggcggagcccccgtgcgcaacactgaCgaactaagtgatctgctcgatccactcctcgtagaggtcatcaaccggat
3459516_1bs_479	chr1B	134.663	A/T	3459516_1bs_479,aattattactactacatcaagaaaggtaaactagctagaagctattactaAatttttttggtttttcttaaggtttaacaaacacacaagaagaaagcagg
3480225_1bs_7151	chr4B	422.927	A/G	3480225_1bs_7151,tttaaagctctaggatcgggcgggcagccccccttgacggaggaaggccaAcctgctctgccagcaacctctgtccaagcaaagctacagggcggcctatc
3484571_1bs_5616	chr1B	136.204	A/T	3484571_1bs_5616,ccacggcagcagcaccatctgcagtccaaacataccacattaatatcatgAcgccttcatattttcctatacaaaggaaggcagagcacataccttgtgat
3437233_1bs_8352	chr1B	136.295	A/G	3437233_1bs_8352,cgccccttaaataattgcctttttagttgcatgcatgtccacacttagtcAtgtacaaagcagcgtcaaatcattgatggcagaggaaacagtaggaaaga
3415017_1bs_936	chr1B	136.826	T/C	3415017_1bs_936,aggcttttctctactcctataaaaaccacagttggtggtgatggtgtgccTgccattcatcattttcgaccgtctgatctgcatccaacgcatagaagacg
3415017_1bs_1111	chr7A	21.89	A/G	3415017_1bs_1111,ccaagcaatggatccttctggaaaaacctagaaccgaagtggcagcggccActcttcacgccaccggcatcgtccgatcccagctcctatctgctgcagca
3470115_1bs_913	chr1B	136.908	T/C	3470115_1bs_913,gaccgattggaactggtggatgccgattgcccccactactttgggatcaaTgtaacgacaccataattaagctaaaagcatctatcacccccaaagagaag
3428771_1bs_975	chr1B	137.07	G/A	3428771_1bs_975,ccgcagacgccctctcggcggaagtggccgcgctcaatgcggatgcagcgGcactcttggtgcaggcgacggcactcgggggggatgcgtccatcgtacgg
3422986_1bs_4169	chr1B	140.705	A/G	3422986_1bs_4169,cccttgattcaaaactgctgcctcagcaggacctgcagtctcagctttccAtttctgcttccgactggagtttcctcctccggtgtcctgggcgactgatc
3460315_1bs_587	chr1B	148.293	C/T	3460315_1bs_587,cgttgcttcctcggcggcgacttacacaacggcactagctgcagctgctcCggctctcgctcgtgctgcggctctgttcttgctatcggtcgcgctgctgt
IWB9084	chr1B	144.879	T/C	IWB9084,TTCATAGGTTTGATGCCACAGGCTTGATCCCGTTCCTCACATGGTACATG[T/C]GGATGCCAAGAGGCTGCGACGGTGTTACTCAATCCCCGTTGAACCGGTAT
IWB9083	chr1B	144.879	A/G	IWB9083,TCGCATCAATAACCAGAAGGCCCATGAAATAGCAAAATTTACAATTCCAA[A/G]ATATTCTAGGCTGCTGGATGGATGTTTTAATTTGCAATACACATTTTTTA
3418406_1bs_2440	chr2B	229.771	C/T	3418406_1bs_2440,ggtagtgtcgccgctgctgcaggagatggtgctccttgtggagatggtgcCgatgttggagcaggtgctggtgtcgatgctcgatcctccagaagatcagt
IWB34044	chr1B	144.274	A/G	IWB34044,TTACTCTTGTTGATCCAAACCCTGTTTGTGTCTAGGCAATCTTTATATAG[A/G]GAAACACATTAAAATTGCATGAATCACAARCTGCTACTACTTGCCA
3431240_1bs_2576	chr1B	151.089	C/T	3431240_1bs_2576,aaatgattttggcataaagcatatggctagcagagagtaaacacaacttgCagaagtgttggcttgtcataaagtcatcatgtaactgaaaaggctgcagt
3436865_1bs_6225	chr1B	146.4	G/A	3436865_1bs_6225,cacaccgtactgccctacagcgccgcccaacaccgtcctacctctccaccGccggctccacgccctcgtgctctctctcgcggtggtcgcctccatccagt
3462453_1bs_4049	chr1B	145.241	T/C	3462453_1bs_4049,atggatgacaccctgatgcgcgtcatcgccacggttgagcaaaactttgaTgcatggcacttgagcgctgcagatcaagataggcatgtcagcgccgacag
3418299_1bs_5188	chr1B	147.34	G/A	3418299_1bs_5188,gacggggaaacataatttaagaacaaaacacgattgcttgacatgtaaacGtaactgtctgcattcaaacattttatagttcaaccgttacaggcatacaa
IWB8023	chr1B	144.931	T/C	IWB8023,CGATAGCAAGTTCGATAGTTTCACTGTGCAGGATAACATTGATTATATCA[A/G]CAACTTCATCGCCAGTGAAATCAACGCTATAAATAGGCCAGATGGCCCTC
3458802_1bs_10876	chr1B	150.667	C/T	3458802_1bs_10876,gcggcctcggattttggcgcattgtttgtggtctgcaggtaggcgtctcgCgtagcatgggctataaggcgtcagttttttgcagcggtgcggctcgccta
660900_1bs_281	chr1B	145.237	A/G	660900_1bs_281,ggcatctcggctgctgcagctgccctgtcggctgccgcagacgccctctcAgcggaagcggacgcgctcaatgcagatgcggcagcactctcagcataggc
3414393_1bs_1704	chr1B	147.827	C/A	3414393_1bs_1704,actttacagtcgaaactaaattttactgtcgaaactgattgaactagtaaCagagcattgcaatagatgtttagggcgttcgagcactagtagcagagaag
3426246_1bs_1654	chr1B	141.759	G/T	3426246_1bs_1654,actacaacaagccggaacgaagcgaatctacgggcgcagcaagcatctgtGctaaaatgggctggccttagtgcagcccataggcgattcctatcaggaat
3456976_1bs_7254	chr1B	145.452	G/A	3456976_1bs_7254,atttgtttctgcagttctgctttcttctggtgattattaactattacctgGctcctaaaatctacaagtgcatgctctatccaatgcaacaaaagaccgat
IWB60134	chr1B	137.445	A/C	IWB60134,GAAACGACCCTGCTTGGGGTCGTACTCGCTGTATCGCGGGTCCAATGAAT[A/C]CTCCGGCGACTCGCACCGATACTCTTCTTGGTCCCACTCCCACTTTCTCG
3418406_1bs_2446	chr2B	229.771	T/C	3418406_1bs_2446,gtcgccgctgctgcaggagatggtgctccttgtggagatggtgccgatgtTggagcaggtgctggtgtcgatgctcgatcctccagaagatcagtatgatc
3452921_1bs_1786	chr1B	152.394	C/G	3452921_1bs_1786,gccgaccttcatccattaattccacgcgtgtgctgagaaacctactccgaCaacacatccgctcgcgagctgcccatcattaaacacaacgccagttggct
3470577_1bs_3327	chr1B	152.826	T/C	3470577_1bs_3327,gttcttagaaatcagatcgcaattgcgttggcccaactcctgaacaaacaTagaaacacatttaaagaacccgggagctaaatcgaagaatataaaagggc
3479439_1bs_16162	chr1B	151.069	T/C	3479439_1bs_16162,tagagatccactgcagcacgaaagttaagtgaagtatttaaaactgcaacTaagaagttaagcaacactgtaggcagcatgtctaacaaatgtctgccata
3479439_1bs_16378	chr4B	628.226	A/C	3479439_1bs_16378,ccacaatagtacatctcctttattttaacgaggcatcatatttgtgttgcAgcttatcctccttctcaccctcgccggcgatggcttcagtgttcacacaa
3421840_1bs_2939	chr1B	150.89	T/C	3421840_1bs_2939,gactagattaggtgctggacgcgactttttcatttgctttctgcagttggTgtgttcatccttatttgaaactttgttggagttgcttttagcgttgttgc
3462453_1bs_4011	chr1B	145.241	C/G	3462453_1bs_4011,catggcccatcgaggatgaggcgctccccggcaacacgatggatgacaccCtgatgcgcgtcatcgccacggttgagcaaaactttgatgcatggcacttg
3414927_1bs_9656	chr1B	148.478	C/T	3414927_1bs_9656,cgtctacagcatgaacgattaagagatgggcaatgctagtcggtcgaccgCttagaatatcaaatcggtgaccctaggaatcgcgtgatcaaagttgggtg
3483892_1bs_9927	chr1B	149.086	C/T	3483892_1bs_9927,tctggacccccttgaactgccgaaccgggttgcgatcttcatggctggtaCacagcccatgttgcaatcctcaactgcagcaacaatgatttccggagcgg
3419764_1bs_806	chr1B	137.181	A/G	3419764_1bs_806,atttgcttttcgtgaatttttgcagttctacatgtagattttgtgacagtAtaaaacaaggcacaacatatcttcatttttcgacattgctttgtagagat
IWB34046	chr7B	630.11	T/C	IWB34046,ACATCATGGACGAGRAAACCCAAGCCAAGGTGATCACAACGTCCCA[A/G]GATTCTATCCACTTTTACTGGCAAGTAGTAGCAGTTTGTGATTCATGCAA
3471148_1bs_4712	chr1B	147.379	G/A	3471148_1bs_4712,cgtagtggactacaagggcgcccttggatccaccccaccgacgagatgctGcggacgcccaccgtgcgaactgcagcgacagacagggacccgggggaggg
3458929_1bs_1401	chr1B	140.22	T/C	3458929_1bs_1401,tgtccaggagctcacgtaaatcgtgtgcggcatcagtgggtactctatcgTgaccatgaagtgattggtccggtcgattggccgcattgttctttggcgga
3472788_1bs_570	chr3B	376.67	T/G	3472788_1bs_570,tgtaatgtgttcctgcaaatttggttagatgtcggcgctctacgtcctcgTgtcccggccctcgagcgagctcagcatcgctggtatgctaggtcgcgatg
3443647_1bs_414	chr1B	151.76	G/A	3443647_1bs_414,gtaagaccccggttacaacttcggatatccgccaggccatccatgggcatGgaccaacttaggccaaaagcctaagcttgggggagtacgtatttctcact
3421460_1bs_1566	chr1B	150.232	C/T	3421460_1bs_1566,tgcctgcgcctttgttgtttgatttaactgcaggccattaccttgtcttgCcgaaagctgtgtacgcgcaccaaggccagacatcagctccagagcctgag
3483274_1bs_3465	chr1B	148.615	A/C	3483274_1bs_3465,ttactcctgccctcacatcttcttcttcctcctcacgactccgctgcaacAgagcgctgccgccgccgtcctctgtcaacaacaccaactccggccactgc
3474620_1bs_6491	chr7A	365.238	G/C	3474620_1bs_6491,atcacaagtcacgagtaatgttgaagtgttaatattaagtgatacatgcaGtaagagaaggccttcagtaaaaaaaacatctgattactgtgaaaaaactg
3474201_1bs_4919	chr1B	145.083	A/G	3474201_1bs_4919,acttatgatacgtctctgtcgtatctactttcccaaacacttttgcccttAttttggactctaacttgcatgatttgaatggaactaacccggactgacgt
3471121_1bs_824	chr1B	154.242	T/C	3471121_1bs_824,catgattttctcgtacatgtggatgtgtaggtcgatgaattcttgcaaggTgaggcgcctcgcggtgagcgcgacctccaggtggacattcttcgtggcgt
3470963_1bs_1020	chr1B	152.938	T/A	3470963_1bs_1020,gcggcgaagtggatctgcagcgcatatctgagcttgtctcccttgggggaTgtgaggatgatgccggctcccaagccggtgcgcatcttggagccgtcaaa
3465319_1bs_720	chr1B	154.846	T/C	3465319_1bs_720,tttcatccagcggcggcgcaggagggcctccgaccccttcttctctgctgTcgtcccgtcgcccaccgaaccacgccccaagaaccttaagttataattta
3416703_1bs_1203	chr4B	521.485	C/T	3416703_1bs_1203,cagccaagatgaacacggcttaaatctgtcatcggactatgctcaggaggCagtgactgtcctgtccctagatccggaacagattgcactgtccgcggacg
3455035_1bs_6550	chr1B	155.073	A/T	3455035_1bs_6550,ggctatcgctgggcgagccgtgcccattttgttttatttgcagagagagaAgagtggggccccgtgatggcgtactagactgttgcctttaattatcatgc
3484213_1bs_478	chr1B	154.218	T/C	3484213_1bs_478,tatctgttacctataatttcattgcttgcagagaataccttactgaaaacTgcttgtcatttccttctgctcctcgttgggtttgacactcttacttatcg
3484400_1bs_5789	chr1B	154.006	G/A	3484400_1bs_5789,atgatgacggggtggtagttgctgcagatgaaggtgacgtggtgaacggcGgcgaagatggcgccaacgacggcgatggtgaagccagtgacagcgatagt
3484079_1bs_13072	chr1B	156.203	G/T	3484079_1bs_13072,caagaagtagaagacgtggccaactacttctgacgacaccggcctcgactGcaacaatccggcatccctagtaagcatcatatttcctaacattacttagc
3482764_1bs_6711	chr1B	156.688	T/C	3482764_1bs_6711,gttcaaagaagcatctctgcagggattctgacaccgagcgatgaactccaTgaggaagtggcagctgcgtccgaggtgtcgggagagaagttatggaggct
3422618_1bs_3655	chr1B	156.697	G/A	3422618_1bs_3655,ttctcgctacagagcacggcgaagtgttgcacctgactctgttttgcaggGaaatatgaatgaagtgatagtacttgcaaacatggactcctctttgctgg
3467899_1bs_3677	chr1B	157.93	T/A	3467899_1bs_3677,acccggtacgctgctgcaagttggtgtgtaccacaaatccactgaagatgTtctgcaggagcatgaggggtcttattattcttatgaattaattaattgat
3425300_1bs_1434	chr1B	158.953	C/T	3425300_1bs_1434,agctcgctcgtgcagctgcgcgaggtcttgtagtaaatcacctgcggacaCgggcatctcctgttcggggcggcctgtcaacatacctgcagatttaaact
3414177_1bs_1049	chr1B	156.962	C/T	3414177_1bs_1049,tcgtcgtcgtcaccgaaaccaagatgaaacaccgccgctatcaccatagcCgatttgttggattgcatcaaatcttctcccctttggcggtcgccgcatct
8007363_2bl_1799	chr2B	429.745	C/G	8007363_2bl_1799,ccatgaatttggccagtgctgggtacccgaggatggcgttgtatggcagaCgaatatcggcgacgtcgaagtcgatgagcttggtgtggtagttgtcgcgc
3450126_1bs_1003	chr1B	158.229	T/C	3450126_1bs_1003,acaccgagcgcgagctgctgagggcaaagatcaccggaaggacgaagcagTacgaggataccacttccttgttgaagaggacgggcgtcattgtcaagaaa
3464144_1bs_2809	chr1B	158.993	G/A	3464144_1bs_2809,atgtagactgcagtgcaatcgctcgggttcagtaggcgaacgcctcgctcGggtttagtttgaacccgatcgcatgtacgagataaacacgcaaacctccg
1860488_1bs_905	chrUn	339.538	C/G	1860488_1bs_905,ctagttttttgttagtcaacccattgcacatggaccgtgctagtattttcCggaagcaaatattctactttgaacaaaaaccacaacacttattttgaatc
3453629_1bs_14587	chr1B	159.229	T/C	3453629_1bs_14587,tacctggtagaacgattggtggagtccaaactgctaatcaaggtctggatTtgttcatttgtcgctattatgcgtgggtcggactcgtttggatacatcgt
3472384_1bs_7099	chr1B	161.251	G/A	3472384_1bs_7099,ctatagataacctagcaatgctcaggtactaaacaaatatcaacttacccGcttaacattgaagcatgcactgtgagaaatccactgcttcttcccatcag
3451953_1bs_679	chr1B	161.313	A/G	3451953_1bs_679,ctatgatcttggtgcggtgccgtggatgtgccagcggccgctctctgtgtAgttggccacgctgtcctttgcagatcgctggagggagagaggaggtgctc
3440405_1bs_1475	chr1B	162.219	A/G	3440405_1bs_1475,ctatatgcaagacctaaatattagaatgttttctataattgtgcaataatAtgctataagccaaaggatcatttggatgaagcccgacactcctcctagat
3433592_1bs_3397	chr1B	185.105	T/C	3433592_1bs_3397,ttgtcgcgcttcccaaaggtaacaggagggaggacctgccctatcagaacTgtggaaccatcggtgactcgtgagaaaggcttggtcggctgcagctaatt
3421777_1bs_975	chr1B	166.285	T/A	3421777_1bs_975,actactttcgtcaggataagatgtactagttgtctcccttggaatttggcTgttgtgggatcccttcccaccttcatttgggaagaggaccaaggctacta
3456838_1bs_4234	chr1B	163.385	G/A	3456838_1bs_4234,gaatccctccaatctagttgatttactatcgcacaagattcatctccatcGcctctgggaaccatgtgtgttcacccacacatgcaaaaggaaaaaagaaa
3423040_1bs_1125	chr1B	162.286	T/C	3423040_1bs_1125,acaccctgtgctttgctgcagagatcttcaacctttacaacttttagaggTgtactgagggttttttttcttctcgataaagggcgcttttattaactcca
3429177_1bs_8313	chr1B	193.745	G/A	3429177_1bs_8313,cacgctgcacctggctgcagcgcacagagacccgcaagatcaagatctccGtcaccaaagggctcccgcggccactgcaggctgccgtgccttctccgccg
3447041_1bs_12745	chr2B	104.365	C/T	3447041_1bs_12745,acaatggcaattgagtgggtggtgggtgggtaacgaattccttcgtcgtcCgcttcccactcaagccggacatagttcggccaagaatcccccgacagaga
3472963_1bs_9125	chr3A	113.884	A/G	3472963_1bs_9125,gagagcgatcctcccacttgggggcttagctgcagtctcgtactcgcctaAgttcgaaaaaatcctaccgagtgaagagcaatcctctcactcgggaggct
3434150_1bs_6054	chr1B	170.39	G/T	3434150_1bs_6054,atatctcccactcaggacaagctttactatgccgtgcaactctgctcccaGcatggagagaaggtctccaacaacatagcagagtacgagggcctgatagc
3484765_1bs_11827	chr1B	162.408	T/C	3484765_1bs_11827,tgcaatatcgctgggtggtgggaaacaagtgaggaaatggcgggaaaccgTggcgtgttcatagaatgccatcaattaatggaaacttacaatataaatga
3442825_1bs_1447	chr1B	169.973	C/A	3442825_1bs_1447,taagtcactaagggccgactcgacagagacctgagggtctatagcgatggCgaacaagtccaggaagcgggttgcaaaggggcatcgccaacccacctatc
3460675_1bs_5370	chr1B	170.09	T/C	3460675_1bs_5370,tgagccctggcgcctttgtccattccgccatgaaatctgcaagcgcggctTccttgacgaccctggtcgtgctgaattccatctcaaatgcttgcaactcg
3436724_1bs_4443	chr1B	177.335	A/G	3436724_1bs_4443,aattgaaggcattaaaagcctcttcggagaagatgttgttccgaagcacgAccctccggcgccggtgattaatggtgctctctacttcagagttcgtggcc
3467288_1bs_2542	chr1B	181.767	G/A	3467288_1bs_2542,ctgaaagcaagcagcacaagaaaagtgtcaacaaggtgttgtccagtgcaGcactctctgctggctgtgacagtgtactgcatgtagaggaggaagtgggg
3484177_1bs_16501	chr1B	163.093	C/T	3484177_1bs_16501,gcttccaaaggcccacatactcaatcgtggctgcaggcccaagagcaccgCagatgtcttgaatctaggcgcactgcgggatggcatcacaaacgaggcgc
IWB55658			T/C	IWB55658,gagaaagaaagatggcaggggtacatcaaggactatgatggaggaatact[A/G]ATGGAGTGCAAAATTGATCAAAAGCTTCCGTATGTTGATCTAGCAACAAT
3455146_1bs_980	chr1B	192.771	A/G	3455146_1bs_980,gtggcggcggcggcatcacgctggcggccctgatcggcctggtggatgccAtggagagccggtgcagcaggcgctggggcgagagggcgagcaggagcggc
3456723_1bs_486	chr1B	164.153	G/A	3456723_1bs_486,ccttgtgtcgaatcaataaatttgggttgaatactctaccctcaaatattGttgcgatcccctatacttgtgggttattagtatgacttgccggctggagc
3469425_1bs_10182	chr1B	179.912	G/C	3469425_1bs_10182,gcagggacggacccgagcacagatgccatgccagtccttaatcatgaggcGgtcgtgggcaggctcgcaagggcgcgagactttcttggtgacgaagcgcc
3793682_1bl_7161	chrUn	7.15734	A/G	3793682_1bl_7161,cactgacgctgcaatgacgtgcacactgctttcttgtgtcctctgcctccAtgcacactgcagtttgccgtgccgctgacggggtcgatcatcttcgcctc
3421841_1bs_2907	chr1B	162.726	A/C	3421841_1bs_2907,gttggacggaggtcgccggtgtcgcagtctcgcccttcttacaaaggggcAgcctgccgaacttcggaaccactaagggttccagtgcggagtccggccca
3419529_1bs_7931	chr1B	190.194	C/T	3419529_1bs_7931,ttttgcccctccccatttatagcccaagggaggccaaccgccgggctccaCgatcataggtaatgatgactcttttttcatgcagtagggactcgccaaat
3418001_1bs_7859	chr1B	177.426	G/C	3418001_1bs_7859,tcggacggtgttcaggagaaggcacctgcagctgccctgtccttagatccGgagcagatcatgccatccgaggatgggtggatagaccccgccatgaaggc
3482846_1bs_1541	chr1B	189.631	G/A	3482846_1bs_1541,gggggcttagctgcagcccagttctcgcctaagtttctgaaaatcctaccGagtggagagcaaacctcccactcgggggcttagctacagcccagcgctcg
IWB62862	chr1B	178.098	T/C	IWB62862,GACAGCGTGCGCCACACCGTGCTTCCACACGGGATTCTTCCCCAGTGCGG[T/C]GAACAGTCACCCAAGATGATCATCGGAGATCATCTTCACCATTTCGTCGC
3470420_1bs_1139	chr1B	188.831	G/A	3470420_1bs_1139,gcccctacaggtggctcactctgctgtcgagcaaggacgaggccgcggcgGcaatcaagaaattccaagcgcgtgcagagacggaggcacgacgcaagcta
IWB7186	chr1B	163.097	T/C	IWB7186,TAATTTTGAATCGATGCGTTCTAGAAACATCTATTTTTCTTTTTGTTGTG[A/G]GCTTGTTTCGTATGCGGAACTGTGAATTGCGACCTTCGCTGCAGATTGTA
3476932_1bs_1821	chr2B	21.4282	A/G	3476932_1bs_1821,gatctttcaagaacttgatagctgactgagcagtcagctttctcacgacaAtcactttcggccacgttataaacttgtcgatggcaacgaacaagaattca
3824781_1bl_11008	chr1B	215.118	G/A	3824781_1bl_11008,cggccagtgttgcatttaatgccgaccctctcatgaatggacgtgtggccGgagtgggtttctcggcttcagtgccagtttcatggaggcaattgaatgcg
IWB59727	chrUn	439.242	T/C	IWB59727,GAGCTGGGCGACGCTGCGGTGTACGCTGGCCTCAAGTTCGCCTGACTTCC[A/G]TCAAAGTGTAATCATGTTGTACACAGTACACCGTTCTCCATCGGCGTCGA
3434227_1bs_3448	chr1B	216.801	C/T	3434227_1bs_3448,ttgatgcacggtgctgaagcgccatgcgccaagtgtctgctcaaccctggCgatgacgcgcatcacgacgttgtccatcatgttgccggggagtgccttag
3421987_1bs_5959	chr1B	201.507	C/T	3421987_1bs_5959,tgcaccactagcgtggcgctgaacacttgattggttgccgctagatacagCagcagtggctctcatgctttaggcgcaaccagtatcggcgtggaggagag
3484698_1bs_1323	chr1B	213.244	G/A	3484698_1bs_1323,gcacttggtgccactgacatcaccgaccatgaggtggtgaagaaattactGagatcgcttgatttctcatttgacactcttgcactgatcatacaagaaca
IWB31810	chr1D	107.217	A/C	IWB31810,NNNNNNNGGCTGATGGATGCCGTATTGTTAGCCACAGTACTTCATAAACCACTT[T/G]ATTTTCTCCATTTCTCGGTGTCTAGTAAAGAAACATTGATCATAACTATC
3414000_1bs_1265	chr1B	222.805	A/C	3414000_1bs_1265,atgctaagtttccattaattgatggcgttttatgaacacgccaccgtttaAcgccattttctcaccggtttccgccgccacccagcgatattgcccgcagc
3880506_1bl_6024	chr1B	252.916	G/A	3880506_1bl_6024,taaccggtgatgttgcttgttgttaactgctctgctttgttttgttaactGatgttcgggtcaagggtgtgcgcatgagcttgtgtttgatgtttcagcca
3440093_1bs_639	chr1B	225.252	G/A	3440093_1bs_639,cgaccgcaagtgaagtgctattcacgtccaacgaagccagggagccgctcGttgaagtgtcgagcccgtccttgggcaggctgcagggttatattcggcgt
3810703_1bl_10881	chr1B	248.942	A/G	3810703_1bl_10881,agccctaacgctgccggaagggtcaccaagtggaacatcgagctgcaggcAttccaagtggagttcagcaccaccagggtcatcaagggcgcggccctcac
3418723_1bs_637	chr2D	68.2311	G/A	3418723_1bs_637,agtgcgtcaatgctgcagtccttttcttccccggcggatctgtgaccatcGgtgaggagggagagaggggccgtcttttttagatttggagagagggtggt
3881231_1bl_1364	chr1B	269.868	G/A	3881231_1bl_1364,gggaggaggagttgctcgtggccgaggtcgaggtagagaagactttttccGtcgaggaattggcggtggagtactaacgcgagctctagtgtagccactac
3906127_1bl_1548	chr4B	66.5148	T/C	3906127_1bl_1548,agtgtcagggggttagataagcggtgatcagcactaagctaatcaactgaTgggccggacccacctgacaggctggcgcggtcaaggcggtcaaccctacc
3881231_1bl_1319	chr1B	269.868	G/A	3881231_1bl_1319,agcgacagctggagatgcaggaggcgacggagatcgaggagtgtcgggagGaggagttgctcgtggccgaggtcgaggtagagaagactttttccgtcgag
3811961_1bl_1785	chr1B	269.88	T/C	3811961_1bl_1785,ccttccatgctaagtttccatcaattgatggcgttttatgaacacgccacTatttcccgccatttcctcacctatttcctgccacccagtgatattgcgcg
3911750_1bl_1197	chr1B	270.848	C/T	3911750_1bl_1197,aagtggtggttctggctcaggctctcgagctgatgtctggcctcggtgcaCgtaaacgaccaccggcaagacgaggtattggcctgcagttaaatcaaaca
3918457_1bl_621	chr1B	271.796	G/A	3918457_1bl_621,gtcgacgcctgcgccgagagcgcggccgcctacgccgagagtgccgctgcGtccgtgttgagcgcggctgcatccgccgagagggcttctgtgtcagccaa
3864255_1bl_1468	chr1B	271.574	C/A	3864255_1bl_1468,gcagttgggttcggtcaacgaagactccaccggctcgctctgccatggcaCcctcacaaatggcaccgtgtagatgctcgatccttcaatctcaggtggat
3864116_1bl_2038	chr5B	181.684	T/G	3864116_1bl_2038,tagtatctgcatcaaagcattctgttactggatcaactgagtgagctccgTtgggaaggcaaatccattgtcacgtcttggaggcatctgatgggttagaa
3820982_1bl_1080	chr1B	271.239	C/T	3820982_1bl_1080,cggagctgcagcccacgaggaagcctggtgagggccagctggaaggctgcCggaggagccagggggcaccatccccacctctgcatccaactccccggcaa
3801824_1bl_7343	chr1B	271.836	G/A	3801824_1bl_7343,gggtagctgcagcagccaagacggctacaccagctactgcaacgacgactGcaaacgccgagagtgctcgaggagccgttcatgctgccgatgtcgccctg
3921658_1bl_2950	chr6A	388.342	C/T	3921658_1bl_2950,gggtcgatggccgcacataaggaaatgcctccttattacgcaaaaattaaCgattcctccacctgacagtagggacccaccggacgggccaccgtattcac
3882045_1bl_754	chr1B	275.409	A/G	3882045_1bl_754,agaatcctacttcggccacacgtccgttcatgagagggccggaattaaacAcaacaccggccgagctcctctcgtccgccctcagtttaaatgaggctaga
3828621_1bl_5339	chr1B	277.318	G/A	3828621_1bl_5339,cctcaagccaagcgaggtgatactaaacaaggtactctagtgctcagtttGttacttttttagagcactcagtttattgctatgtgtgcacaacacaacac
3855368_1bl_8643	chr7D	213.273	G/T	3855368_1bl_8643,ctctccctagccaatcaaactggttgattttctggggattggttgagaagGccccgatctacacttccaccaagagaaattcgattcccccactaataccc
3893913_1bl_480	chr1B	277.701	C/T	3893913_1bl_480,cgttgcttcctcggcggcgacttccacaacgacactagctgcagctcctcCggctctcgcttgcgctgtggctctgttcttcctgtcggtcgcgctgctgc
IWB36303	chr1B	278.092	T/C	IWB36303,CGTCAGGTCATCCACCGCATCTCCACGCTCGAAAACGGCGGCCGCACCCATCCCGGAACCTATGCACATGGAAATCACTCCAAACCGGCAGTCCTTGCCT[T/C]GGCGCTTCATCTCGTTGAGAAGAGTGCTGACACATCGCGCACCTGTNNNNNNNNNNNNNNNNNNNNNNNNNNNNNNNNNNNNNNNNNNNNNNNNNNNNNN
3886100_1bl_3236	chr1B	283.724	T/C	3886100_1bl_3236,ttgatccacggtgctgaagcgccatgcgccaagggtctgctcaaccctgaTgatgacgtgcatcacggtgtcgtccatcgcgttgccggggagtgtcatgg
IWB8046	chr1B	283.127	A/C	IWB8046,TGAGTGTTGCTTGTTTAAAATTGATTCTCTGGTTGCCATTTTTCTTTTGA[T/G]CAAGCTGCTTGAATTTTAGGTAACCTGACAGGGCCCGCAACATTGATGTT
IWB28335	chr1B	278.474	A/G	IWB28335,CATGTGGAATCACAGCTATGCATTTCAGCTCGTCTTTTAAGGGTTAGCGC[A/G]TAGTATGCATTTTGTATGCGAGGCTTTTAGTGTACATACTTAGTGAGAGG
IWB8837	chr1B	283.122	T/C	IWB8837,GGGCCGGTGAAGTTGCTTCCATGGTCGGAGCTGCGTCCATGGCCGGCGCC[A/G]CGCAATACTATGATGCTGTGACAGGAGGCCACTCCCCTGGCCATGGATCT
3825863_1bl_4390	chr1B	281.087	C/T	3825863_1bl_4390,accgaaacaaccaggctgcagcacaggaggagcctctgcagtgggatccaCaggtgcccgctcctcagcatttcaacataggacgccacggcttctacgac
3913029_1bl_4390	chr1B	278.707	T/C	3913029_1bl_4390,atatagcaaaaaactaccatattacaggctatcgccacaaaaaactaccgTtttttttaatttttcaaaaaactaccataaatttggttggcagatccaaa
IWB9700	chr1B	282.134	T/C	IWB9700,TCAGTGAAGAGAGTGTGAGCTTACCATGGAAGTTGAAACTCGTGGTTGTG[T/C]GGATGTTGCAGCCTGGGGACGTGTGGATGGTGCAGGCCGAGGCCATACTT
IWB11553	chr1B	280.167	T/G	IWB11553,ACGATATATGAAGCAAACTGGAACATATTGATTAGGGGATATTTTTGGGT[T/G]TAGTCCCATCTTTGATGTAATTTTATTGTCGATGGGTTGACAGTTTTGAT
3835607_1bl_6500	chr5A	365.122	A/G	3835607_1bl_6500,ttaccatttgcctaataacaaccaaaatctgcatagggagtaattaacctAaggattcttaatcaaccccccgggcctgtgctcgacatgagtgttgatcc
3863147_1bl_1171	chr1B	281.268	G/A	3863147_1bl_1171,tttcccttgggagtaattaacccgagggtcatctttattttaatcccactGggccagtgcttctctaagtgttggtccgaactaaggagactgcggggcca
IWB9464	chr1B	282.428	A/G	IWB9464,GGAGAGATATTCTGTTTGGAGAAATTGAATCTCTGTACGTTATTGATGAT[T/C]GTTTGGATTTGTTTGGGTAATATTGTAGGTGACAATGACAAGTTGTACGT
3852692_1bl_3813	chr1B	280.279	C/A	3852692_1bl_3813,ttgtgctagcccgatgttcctttatattgtaagtttccattaattgatggCgttctatgaacacgccacagtttcccaccacctagcgatattgcacataa
3759546_1bl_860	chr1B	279.6	C/A	3759546_1bl_860,ggctactgcagctgccttgtcggctgccgcagaagccctctcggtggaagCagctgtgctcaatgtggatgcggcggcactctcggcataggcggctgcgc
IWB8588	chr1B	288.396	T/C	IWB8588,AAGCGCAATGAGAGCATGCTGAAAAACTGCCTTGTAGAACAAAATGTTTG[T/C]GTTTTCCATCTTCAAACATCTAGTGAAGTCGATAGGAACAAACTGTCCTT
IWB8920	chr1B	285.336	T/C	IWB8920,TAGGCAACTTTGAAAAATTATGATAAGCAACTTCAGGATATAGTAAGCAA[A/G]CAATTTTGCAAAGTTAGGCAACTGAGCAACAATAGTAGGCAACTAATCAT
3916642_1bl_2420	chr1B	288.167	A/G	3916642_1bl_2420,nnnnnnnnnnnnncatctcaaatacggattcatcctaaaaaaaaaaatacAgattctcttttttccttcaagagtaccttagctttataaaaaagaggaaa
3819478_1bl_1039	chr1B	288.509	G/A	3819478_1bl_1039,ttcccttcgtgcccctccccctcttcatcagcgcactcgtccaccacagcGcatctgcctcatcgacgatgtcgtacgctgcagtggagccggtccgccat
IWB25904	chr1B	285.608	T/C	IWB25904,CTTTGAGCCCATCAATCGTGTGTAACCTACTGATCTGCTGAGTTGAGGTG[T/C]ATGGTATATGATAAAATGCCGATCTGCTGAGTTGAGATGCATGATGGATA
3849365_1bl_1010	chr1B	286.784	C/G	3849365_1bl_1010,ttggccttggtggtggcgcctcaagttggtggatacaaattcactaaagtCcacatggatggaggcagtagcagcaacatcctttattacgagactttcca
3921509_1bl_14275	chr5B	161.219	C/G	3921509_1bl_14275,acggaagcagctatttgaatagatgatgttaaccctgcaggggtatacttCttcatacatgtttccacttagcgtccgcacacgacatgtgctcggtagac
3812734_1bl_6421	chr3B	242.266	C/T	3812734_1bl_6421,acctgacagcagggacccaccggacggtccaccatatttcacgaaaaaaaCgtttccccctgactgctaggacccaccagctacatcttcgcacgcaagga
3907659_1bl_12577	chr1B	285.322	C/T	3907659_1bl_12577,tctggtctgcgggtggccggacgtccggtggttgtagctttgctgcagctCcgtcttcttccatcttcgcttccaagcttccctcacggatgatgtaggtg
IWB8585	chr1B	285.345	A/G	IWB8585,TCGCCGCCGGGGGGAGGCAGGGTTGCACGGGGGTCGTCCGTAGGGGGAGG[T/C]ATAATGGCCTTAGTAGGGTTGTCTCCGTGATAAATTTCACCTTTATGGTC
3885283_1bl_2825	chr1B	287.639	A/G	3885283_1bl_2825,aaggaggaagccataagaagaaatacttgttggtcatggtcgataaatttAccaaatggatataagccaaaccagttaaaacggccgaatctggaccagtg
3810926_1bl_2065	chr1B	325.986	C/T	3810926_1bl_2065,ccgtcggggttcttcgacgggtcggtgttggtctgggggatgcggcgggtCgctgcagcttcggagaatgcatagttcagttagaatgttgtgttgtcagt
IWB71637	chr1B	325.287	A/G	IWB71637,GGCGTAGCGTGGTGTTGTACTCGGTTCTTTCTGTGCTATTTTTGGGTAGC[A/G]TAGTTGCTTGCGTTCTGCGTGGTTTGATTATCCTAAAATCGGCATTGTAT
IWB23218	chr1B	325.287	T/C	IWB23218,AGATGGTGAGGTAGCCGTCATACAATGCCGATTTTAGGATAATCAAACCA[T/C]GCAGAACGCAAGCAACTATGCTACCCAAAAATAGCACAGAAAGAACCGAG
IWB71638	chr1B	325.286	T/C	IWB71638,GACTCCGCTGTTCTATCGGGCAGATCTGTGTCGATGGCCACGGACATGGC[A/G]TTGTGAGCGTGCTTGGCAGCGGTAGTTGGTAGTCACGGGGTTGTGTCTCC
IWA7280	chr1B	326.784	A/C	IWA7280,TCCTTGCTCGAGTTGGACGCCCAGAACCAGCTCTGGGTGGATAGGGTGTTACAAGAGACCGTTCCAAGCTTCAGGCAGCCCGAGCGGCTCCGCCACTGCT[T/G]TGAGCATCGAGTGTACGGAATGACATTGCTGCAGCAGACACGGGCTCAGGCTGCAGCACATTCTCGTCGTAACACCTTCGGGGCTGGATCCGGCCACATC
134571_1bl_466	chr1B	324.6	C/T	134571_1bl_466,tttgatgcggaggagatctgcagcataagattacctagaacagggggctcCgatatgttggcctggcactacgaaaagtcaggcgtgttctaggtgaggag
IWB38766	chr1A	292.758	A/G	IWB38766,GATTTCGTATGAAATCGAGGTGATAGAAACCAGATTCCTGTTCAAAGAAG[A/G]TCCACCTGGGATCATCTTCACACATTCTGAGAGTCTGTTGTAGTCATTAA
3922452_1bl_4455	chr1B	324.68	G/A	3922452_1bl_4455,tggccgcttccaccgagagggcgtctgcaacaaccgacagggcagctgcaGcagccgagacggctgcagctgctactgcgatggcggcgggtgcaagcgcc
IWB27242	chr1B	327.024	T/C	IWB27242,ACGGATTCTGCGTATCTCATCACGGCGGCTAGACAGCTCTCCCTCGAAGC[A/G]ACGTGGTGAGATAGACCTTTCTCGTGCAAGTCGAGGAGGAGGACCATCAT
3882136_1bl_2423	chr3B	251.781	T/G	3882136_1bl_2423,ttatactactacaagcatggaaagtaaactagctaaatgttataagtaatTtttttgttttttcttaaagttatcaaacacactagaagaaagcaagaaaa
IWB20264	chr1B	328.821	T/C	IWB20264,CTGACACCAAAGTAACCGTAGGCGAAAGCATAGCAAGTCGATCGATCTAG[T/C]TCAGGGGAAGGGTTTGCAAGGAAGGATCGATAGAGCTGAGATGAGGTGAA
IWB4508	chr5D	11.5307	A/G	IWB4508,CCCCATTCGCAGAGTGAGAAGAAGATGTTCTGCCCGTATTTCTTCATGGC[A/G]ttgctcatcctagtgtatctttcgtggacactcctgccagcatcattgca
IWB6209	chr1B	327.483	A/C	IWB6209,ggcctaaatttttacgtgtctttacaggatgcaaccggcaagatacaaca[T/G]CAGTGCAGTGACTTCATAATGACGCGAAACATCCAATGCCGTGAAATGAT
3882700_1bl_2488	chr4D	380.544	G/A	3882700_1bl_2488,tttttttgctttcttcttgtgtgcttgaataaaccttacgaaaaacaaaaGaacattagttgtagcttttagctagtttactttacttgcttgtagtagta
3826537_1bl_4596	chr1B	327.961	A/C	3826537_1bl_4596,taacccctccaacacatagcagatgcagctaaacaagctagcagaaacccAaaacccagcagcctgccacgtggcacatgttttcgataaaaggcgctatt
3875846_1bl_9344	chr1B	328.881	T/C	3875846_1bl_9344,ttattgagtttgtaagtatgagtgatggcttcggtagcttgatatatgctTttatgagatctttattgattaattaataaagatggttgtatgcatcgatt
3826537_1bl_6596	chr1B	327.963	G/A	3826537_1bl_6596,tgatcgacgaaaaaaggaatgtatcaggaggcacctttggcaaaaccctaGtcaccgccgccgtcttcggaagatgccaacgggcaaagcttgcctggcgg
3753254_1bl_4281	chr1B	327.84	G/A	3753254_1bl_4281,tacagttttagtagtatgaaaattgaaaagtcacagataatgtgatggtaGtatttgggctaatacaagtgtttgttgtcatgtacgcccgcagacatttg
IWB6906	chr1B	327.958	A/G	IWB6906,CCAATGATGAATCGTCAGATTGTACTCACACCAGACACCACACATGGATC[A/G]CACATTATGGATCATGTATAACGATTCAGCTCAGGCCAATTCATCTTCCA
3911737_1bl_1038	chr1B	364.069	T/A	3911737_1bl_1038,aaactgaattttactgtcaaaactgatcgaactagtagcatagcattgcaTtagatgtttagggcgttcgagcactagtagcagagaagcagtgatctaaa
3874239_1bl_2910	chr1B	364.82	C/T	3874239_1bl_2910,aatcaatctgcccggcacgaacgcactctaattcggtgatatcacttcccCcaagatattcttcaggcgattggcaataacctttgaaacgagtttgtaga
IWB31677	chr1A	347.634	A/G	IWB31677,GTATGGTGGAATGAGCGAGCATGTCTACCTAGACCATRGGTCATGA[T/C]TGTTCATGCCCACTGCAGGTCATAGGTCTAACTGCATCTGTTTAATTCAT
3793366_1bl_6439	chr1B	374.319	G/A	3793366_1bl_6439,cacagagcatgcatgtatgccatgttcactgtcagaatcccacaccataaGagtttgtacaagccgtttgagctctgttttatggaacccgtacattgttt
3869427_1bl_1708	chr1B	375.657	A/G	3869427_1bl_1708,aagttttcttttaattactactactacaggcatggaaagtaaactagctaAaagctataactattttttttggtttttcttaaggtttttcggacacacaa
IWA1302	chr1B	369.602	T/C	IWA1302,TTATCATGTCAACGTCCCTGTCCAAAACAATCTTTACTGGCCTTCTTAGACAATAGGAAGCTACAGATGCCGCGGCAGCAAATATTGCTGATCTAGTTTC[T/C]TTTCCACCAAATCCGCCACCAATACGCTTAGTCTTGCAAACAACTTTTGATAGTGGAAGACCAAGAGCATTAGCGACATACTTCTGATGCTTCTGGGGAG
3804852_1bl_2183	chr1B	374.203	A/T	3804852_1bl_2183,gctcctgccttctttaacttttaggaaaatgggagacgttttataaccagAgaggaggcaaacaagtttgagaagaagatggaggcttctcacctccatgc
3795664_1bl_14779	chr1B	365.028	T/G	3795664_1bl_14779,ataatgctgaatttcaaaccaacgactgtgagcgcgtgtatggtataaggTcggttaaaaaaaagagaaaaaaaaactctggtttgtggaatggtggtgct
3792336_1bl_1765	chr4D	333.453	T/C	3792336_1bl_1765,ctcgttttttcccaacttggtatcggtgagatgattacactacaccggcaTggagggagggccgaggattagaaggccaacacacacgtgaatgcaacaca
3918719_1bl_4591	chr3D	234.24	T/C	3918719_1bl_4591,gtcttcctccttaagcttcgccggctcgtctgatccagtgctggcaacccTcaaatccacaaatcccgatccccattcccgcaccccccttcttgcaaaga
3869427_1bl_2153	chr1B	375.656	A/C	3869427_1bl_2153,cgtctgtcaaagattagtccgtactggaggaactgttcattcctttcaacAaactgatgacgaaccatagcatcataatctagataagcgggaggcaactc
3833508_1bl_16835	chr6B	55.6699	G/A	3833508_1bl_16835,ctcggggcggctttagccttggagggtcgtgcgcgtcgagccgactcgacGatgttggtgcagatgtctggtcagcttccgactcaccaatcttgccgatg
3915085_1bl_73	chr1B	364.418	A/G	3915085_1bl_73,ttatggaaacaacagggctctactgcgtattttttgttaattttgggcaaAacaatacaaataggtccaaaaagaaaaaaaagaactgtaccaaagaaaga
3858712_1bl_584	chr1B	364.486	A/G	3858712_1bl_584,acgccatcaccttctgcagcgctgaggcggagcccgcaacattcttctccAcatccgcagcggttgcgagtttcctcgcatcgccatggacgccgccgaca
3912560_1bl_5196	chr2B	498.751	T/C	3912560_1bl_5196,gaacacaccatcatttcccgccattttctcatctatttcccgccacccaaTgatattgctcataaacctaggcacggcgcgacgcacggagataacaagag
3913382_1bl_2558	chr1B	365.139	C/A	3913382_1bl_2558,tctccgcttattctgcagctcctattttgagttacaaatatgggcaaccaCaccggtatcaaatacccaggagctactacgagtactggtaaggtacacat
3872634_1bl_508	chr1B	366.084	C/G	3872634_1bl_508,atgcacaattcaccactacgcggcggcatgcacagaaggacgcactcacgCacagccagcacacaacacacaccagcacacgtgtacaccggcgtcgccgc
3857940_1bl_1218	chr1B	365.013	C/G	3857940_1bl_1218,cacacagctaagttggtcaaatttgtccaaccttaggtgtggcaagttttCgcaaacttagtctcaaaccaaacaacccttaagacacttgtcctactgaa
3810131_1bl_1239	chr1B	370.984	C/G	3810131_1bl_1239,gtgcccgccgagtccggaatggatttcagctaagagttgccgcccttcctCttcggagatgcatctttggagcactccgatagtgcttttcttgtagagct
3798823_1bl_1202	chr1B	366.988	T/C	3798823_1bl_1202,gccttctttgtttgatttaactgcaggtcagtacctcatcttgccaaatgTtgtgtacgcgcatcgaggccagacgtcagctctagagcttgagccagaac
3857505_1bl_1475	chr1B	376.056	G/C	3857505_1bl_1475,gtgataatgcactttcaatttctgctttgggacttgtggacttctacaatGactctatgaaaaaacgcaagtgagaactatgcgaataagacatattttga
3850458_1bl_2191	chr1B	378.828	A/T	3850458_1bl_2191,gattttgaagagttttagccgtgcttttaggggtgtttggttcagaagtcAtaggactttttctagtcccagagagtaatcaaaaaagactctccagtaaa
3130358_7bs_6360	chr7B	16.5315	G/A	3130358_7bs_6360,aactggcgcctgcaagcttcacaaaatcgtggcatttcctattcgacgctGcaggcgccgtttatagcctgtttcaaccgaagatctccggggtcccatcg
IWB9008	chr1B	379.383	T/C	IWB9008,ATCTAGCTAGAGAAACGTTGGGTCAAAGCAAAGGGTCTAGGTACCTTGAG[T/C]AATTACACTCTTACGTTGACAAGTGCCCCACAAAACTGCTCACGACCATC
3872423_1bl_4800	chr1B	376.173	A/G	3872423_1bl_4800,gtgccctctgctcctccgtgtccgcgtccaccatgcaggctgccagcatcAggaagcgatagaggatatctaggagaaagagaccaaagctgcaggagggt
3846892_1bl_72	chr1B	378.246	G/T	3846892_1bl_72,ttacctgtctagtaacatagtcaattgcttagggacaattccacaactccGaccaccactttaccacactcgttatatttactttattgcatctttaccta
IWB50917	chr1B	379.383	T/C	IWB50917,GGCACTTGTCAACGTAAGAGTGTAATTACTCAAGGTACCTAGACCCTTTG[T/C]TTTGACCCAACGTTTCTCTAGCTAGATATGCACAGTCAAGACTGCTCCGT
3130358_7bs_6014	chr7B	16.5311	C/T	3130358_7bs_6014,ctaaaaatggatgatctttttttaaaatttacttgtttcaaagagatataCtgatacgttaacgttttgctaaaggaagcattaactaggccgggtttgta
IWB21535	chr1B	380.311	T/C	IWB21535,CATTGCTTAACTTGAATGATAAACTACTGAGCAAGTTGGCCTGAGAGCAG[T/C]gaggttacagctccagatggttcttggttgcaagtggggggagatgcgag
3892787_1bl_292	chr1B	385.159	T/C	3892787_1bl_292,atagcagtaatgtgaccttgcttttnnnnnntttttttttttgaggatccTtgcttttgttcttagcacgattagctagttgcatgaccctgtagtactcc
3895055_1bl_5012	chr1B	381.777	G/C	3895055_1bl_5012,cgtgtagaggtgctcggtgctgcagggcatgttgtgcccttgctggagcaGctgcgccgggtgcccttgcctctaggcgacggagggctccatgcctggcc
3911035_1bl_4414	chr1B	380.887	T/A	3911035_1bl_4414,ggctcgattttctttttgtgctaaaagttaactcgtcttattttttgattTgtttcgtgtacatattaattcttttgctccaaaatttggagacacatgac
IWB7716	chr1B	380.888	A/G	IWB7716,TGGGAAGGCCTTAAACTTTGATGTCGTCACAGTTAGGATGAGGCTGCGAC[A/G]GCGGCCCTGCAGACCCTGTAAGTTGTTGAAGTGGCGTGAAGGAAAAACCG
IWA3295	chr1B	382.222	A/C	IWA3295,TGGCATACGATTTAGGGTAGCCGACTCTCAGGTGCTAACAACCTCGACAGATAGGACTCAATTCTCTTGCATTTTGGTTAGCACAGATGCTGACTGACTG[T/G]GTTTAGAAAGGAGAGGAGGATAGGGCTGATTGCTTGGTTAATCCATTCTTTGTGCAGCAGGGCCTCCAATTTGAGGCCGGCCTAGGTAGGCACACGGTTA
3820185_1bl_6016	chr1B	388.019	A/G	3820185_1bl_6016,tgggtgcccatgatcacagcaaaggtctttatgattttgtccacagttatAttttttataatttgttcctatttatgacattatatactcatgaaacaggt
3792672_1bl_456	chr1B	380.463	T/C	3792672_1bl_456,tttgtacttgttattgtgttctgcataataggatcatttgcattatgttgTcaaatcccaactgcagattagttagtggaaaaaggaatactcacgatcaa
3807849_1bl_17607	chr1B	386.048	T/C	3807849_1bl_17607,tttgagagtggggaatgggtagcggaggttcttgcgcacctgcacatatcTgtgtcttggataacggtggtcggacaaggtcggcgtggtcgtctccagtg
3807038_1bl_8656	chr1B	384.303	C/T	3807038_1bl_8656,gttagtgtcgagtatatatgatctgtgtatactgtatattgggcccgtctCctagttcttatgtagttgaggtccgtagcccacatttgtactcatatata
IWB40109	chr1B	382.222	A/G	IWB40109,GACGCCAGTTATGCCGCGCAGCAGTCCAAGGTGTATCCATCTACCAGCAG[T/C]TGTTCCCAGCAGCAGTCGAAGGTGTATCCATCTGCCAGCAGCTGTTCCCA
IWB35800	chr1B	388.383	A/G	IWB35800,CGCCGGCTTGGGCGGCCCGTTCTCTAGCTCGCTGGCGCGGCTCAGCCCGCCGTACTGCAC[T/C]GGCACCAGCTCCGGCCGGATGAACCTGTCGACGGGAACAAGCAACCGCCGTGTCAGCATT
3848247_1bl_5601	chr1B	388.618	C/T	3848247_1bl_5601,gacacgtgcccttccttactcggccacagttcatccctgcagcctgcagaCagaccgattgaccagtatgtacgtacacatttgcgaccagaatgacaacg
8007363_2bl_1767	chr2B	429.745	C/T	8007363_2bl_1767,cttgaggacattgtagccgtggtgcgtcgctgccatgaatttggccagtgCtgggtacccgaggatggcgttgtatggcagacgaatatcggcgacgtcga
IWB8257	chr1B	382.223	T/C	IWB8257,AACATCGTCAGTGGATGGAAATGGTGGCAATTCATCCTGCATGGCTGATG[T/C]TTGCAATGAAATTAGTTCCTGCAATGCTTCACCCATGGAATATAGTGGCA
3840438_1bl_1374	chr3D	232.275	G/C	3840438_1bl_1374,ggtgtcatcgtagttgctgctgcagccgtctcgactgctgctgccgccctGtcggctgctgcagctgccctgtcggttgccgcagatgccctctcgaggga
3809930_1bl_6629	chr4D	111.914	C/T	3809930_1bl_6629,ccatggttcatcgctgcagcgtgcagacagaccgatcgtatgtacatacaCgtttgctaccagaatgacaagactacgtatgcttcgaccaggtgggtctg
IWB8611	chr1B	385.162	A/G	IWB8611,GCGTGCCTTAACGAGCCTCCTCTCTCTCCTGATCATCACAAGTAGTTCCG[T/C]CACCTCCGTCATATCTGGTCGTTCCTTACTGTCTTCTTTCAGGCACTCAA
IWB8612	chr1B	385.163	T/G	IWB8612,GCGTGTACACAATCCACGTACGAATGCAATTGGCCTTGGTACCCTGACTT[T/G]AATTCTTTTTAGTTCATTTGGTTGAACAATGTGGTCACCCACTATGCATA
3881025_1bl_2550	chr1B	381.396	C/T	3881025_1bl_2550,acaatggagcgataaaataaaataaaacatgctccgcaaaataaagtgtaCtactccctttgttctcaaatataaatctttctagatattccaacaagtga
3842172_1bl_1024	chr1B	380.604	T/C	3842172_1bl_1024,aatgtaccagcatctcaatgagctacttgtttgtttgctccgcaactggcTagttcccaagctgccttcacacctaacactacttctgaaccactgctgac
3814635_1bl_3632	chr1B	389.534	T/C	3814635_1bl_3632,ataattgaacaacggaatgctgggatgtgttgaagttggaggcaaagtagTgagttgatgatctttgcaacagtcattgttcttgacgttgataacatgat
3814635_1bl_4184	chr1B	389.535	A/G	3814635_1bl_4184,catttgttgaacaatgcggtatggtcggatgctggcgcatcataatattgAtgcgagctttatctccatggcatgacaatcgctcttgaagtgaataattg
3814635_1bl_3807	chr1B	389.534	T/G	3814635_1bl_3807,ccgtaggttcatcctggctgggtttttgaagttaatcaaactgtagtggcTgtgacttgttttcctgtccattgagccatccgttggaggctgataatatt
IWB26008	chr1B	390.708	T/C	IWB26008,GCAGAATTGCCGGTTTCATCCCGGCAGGACAACACAGAAGCAAGCCCAGA[A/G]AGTTTAGATGAACCGCATTGTCAGTCAGAGGAAGCCGCTACCCTCCAACC
3821655_1bl_3705	chr1B	389.575	C/A	3821655_1bl_3705,gcagcagaaaaacttgtccggacgtccggacgattgaccggattgtccggCctttacctggatcatctggaacttgacccagatcttccggcttcagcgcc
3808204_1bl_13325	chr1B	390.712	C/G	3808204_1bl_13325,tccaggtcatgcagtatggtcagtgtcatcttcttaatgttgtttggttgCtgtctggtttagctgtacatgttctgacttattgtatctcatccctatca
3856980_1bl_71	chr1B	392.393	T/C	3856980_1bl_71,ttgcttcaccttaagtcaggctgagatcaatcaattctttaagtgccttaTcggagtcaatgttagttccggttactatggcaagataagcagatatctag
IWB8913	chr1B	390.713	T/C	IWB8913,GTACACCGAAGAGTTGGATAAGTCATGGGAGATACTGGATCAAGAAGCAA[T/C]GGCTCTGAAATCCAAAAACTCATCTATCAATGAAGAAATCAGAAAAGAAC
3873335_1bl_3472	chr1B	393.576	T/C	3873335_1bl_3472,ctatgcttacagtgaccaaatccatgagttaccccaggtggcgtcgcaagTtgctctagtttggaccaacactcatgaggagcattggctcggtttgttga
3811960_1bl_1018	chr1B	392.292	G/A	3811960_1bl_1018,ccatgggaggagtaaaaaacttctatgcttgatgccttaaatttgcctcgGaatgccgagtggtttttgtaaccggtaaactttaacaggcttggtgcctg
3813279_1bl_2174	chr1B	393.509	C/T	3813279_1bl_2174,agatggctcgctctggtgttgcctccgaccggacaacatttgctgtccttCtaaagtcgtgcggtgctctggacgactttgcactcggtgtgcaaattcat
3892677_1bl_7117	chr1B	392.151	T/G	3892677_1bl_7117,tcaagctcttgcgcggccattgtggctgcgtcaaggtttgctgttgcactTtcaggccgtgctgctgctgcagctgcacaacagagtgccagtgctgcaga
3804377_1bl_1398	chr1B	391.039	C/T	3804377_1bl_1398,agcttccgcttcagttcggaaacttcggcggcttgagcggtcgccgctaaCagtgaagcctgatatttatcaaacatggctaagtatgttatttactgcgg
3810912_1bl_3722	chr5B	392.765	A/T	3810912_1bl_3722,tgcctatcttgatctgcatcgctgaagcgccatgcgccaagagtctgctaAaccctatcgatgacgcgcttcacggcggtgtccatcgtgttgccgggtac
3802156_1bl_2004	chr3B	536.427	A/G	3802156_1bl_2004,cctgggtcatggtggcgtcggctgcagctagactgggcaaggttgatgcaAcagtacaactctgaagatggattggttgcatgtggctgcggcggcctcat
3862085_1bl_1743	chr1B	393.869	T/C	3862085_1bl_1743,actagatctggagacgctctcggcaggaggaaaggggatctagagtaaggTgaagagaaagaaatgaaggcgcggagtgggtgccagcctttttgtcaacc
3862085_1bl_1984	chr1B	393.869	G/C	3862085_1bl_1984,cgcacctttgggcccgggggctactgttggcgttctggggaccatggtatGcagacttgccagcctgcagcccacgacgtggcttcattgatgccctggta
3828677_1bl_1983	chr1B	394.893	G/T	3828677_1bl_1983,tgcggtcgaaagatcattttaatcgtgtaataataagcgtaataaaatgcGtttcccctgtattttggttcggatactgcactagcaagcacgaacacgaa
3807520_1bl_3957	chr1B	398.135	G/A	3807520_1bl_3957,tttgcccaatcccgagatcaattcacatttggaaaattaaagtgccactgGgaatcaagattttcatgtggtttgtccataagaaaatgattcttacgaag
3885061_1bl_737	chr1B	395.524	G/A	3885061_1bl_737,cctgctgctcgaagtcgaggagcgtgatgccctgcaggcctcctcactagGtgaggtggcccttgccgaggcggagctgttgaggcgccatgaggacttga
3802156_1bl_1719	chr1B	398.029	C/T	3802156_1bl_1719,atacaattgcatcgttataaagccttaattgcaggtaacatcaacctgatCgggaagttcctggggaaaccctagatctgggtctaccggatcagatgacg
3759548_1bl_534	chr1B	399.102	T/G	3759548_1bl_534,caacgctgatgagggtacggcctgcgggtcagggtccatccctccgtcccTaggcaacgcagcttgctccggattcgagtccagggctgctgcaggggtga
3920638_1bl_6725	chr1B	405.619	T/C	3920638_1bl_6725,ttttaagaacgcactactggtagttactagcagcgccgctgtacccgcgcTactactattattacatattctatttcttttttattttatgtggtatttat
3916435_1bl_5615	chr1B	400.793	C/T	3916435_1bl_5615,aatatgtgcttcaacgatatctttccaacggtgtatcatttgcttcattcCgacgagcggtttagaaaaaaacgcgaaaaaacgctcgctgccactcgttg
3837071_1bl_1232	chr1B	406.006	A/C	3837071_1bl_1232,ttctggagctgatgtctggccttggtacgcgtacactacctccggcgagaAaaggtaatgacctgcagttaaataaaacaaagaaggtgcaggcagggtaa
3920768_1bl_9484	chr1B	406.093	C/T	3920768_1bl_9484,cctcctcccccgtaagccttgcccctctcctacatctactggtatgaccaCcttcatcctttccctcatggcctccctcgctgctgcagccaaaaaaatgg
IWB24798	chr1B	402.573	A/G	IWB24798,GAGTGGTATTCTTGTGCAATTTTCTTAATCAGGCTTTTGTGTGAGGGTGC[A/G]TATCTTCGGAAAAAAGAATGACAAAAGGCAGGAGAAAGTGACATGGACAA
3896848_1bl_11672	chr1B	404.517	T/G	3896848_1bl_11672,catcttcccaccacctgcagcggggacgccggatgcgagcttcatacccgTctccagccgaacgcgcgccggccgctctggcacggcggcgggttcagcct
3919232_1bl_461	chr1B	402.729	A/G	3919232_1bl_461,ggaaacgaattccttcgtcgtctgcttcctactcaagccggacatagttcAgccaagagtctcctgacaaggagagatgttttaatgagtttagcacgtgg
3896848_1bl_5617	chr1B	404.523	A/G	3896848_1bl_5617,ggtatccccaatccatcagggttcaaattctggtacttgcattattcctgAatttatctcaggattttcggtgatgcgctttcagtgggaggagacgttcc
3869403_1bl_1407	chr1B	405.488	C/T	3869403_1bl_1407,tggacgtgcgtaaatcgtcgctcctgcagtttcatctacatcaacctgccCccgggtcgactcgtgtccgtttcaagctgttcaaatcgccgcctccgccg
IWB6458	chr1A	376.671	A/C	IWB6458,CAAGATTTTGGACTTCTGATTGCTGTTGGGTGCCGCGTTGGGAAACAGTT[A/C]ATAGATTCTATCCCCGCATCATGATTTTGGACTTCTGGTTGATGTTAAAG
3850478_1bl_406	chr1B	407.242	T/C	3850478_1bl_406,ttcactggttcggctgccgtcgctgcagaataatagggggtgtgggtgagTatagggatggactggccagcggtgggagtagtacggggcggtgaggcctc
3907048_1bl_6170	chr6D	79.1041	G/T	3907048_1bl_6170,tagatgaagatggcctcttccttggtggtgcagcagctgtagatgcatttGttgttgaagtaggagcatgtgacttgtttgactgcatttgaaaaacaatt
IWB26257	chr1B	408.642	T/C	IWB26257,ATAATAGTATGAGTCTGATGATAATTATAAGCCGTTATAATGAAAGAACC[A/G]TCGCCTACTACTATGCCATGTCAGTGTGTTACTCTAGAAAGTGAAAAGTC
IWB71008	chr1B	408.656	A/G	IWB71008,TACATACAAGTGGAAAGCCAAGATAGGCTTTTTCCCCCAAAAAAGAAGAA[A/G]ctaagatagtgcttttgtgaacacaagcaaggcggtcgacttcatggggc
3830132_1bl_3202	chr1B	407.908	G/A	3830132_1bl_3202,gccggccacctggcctccatcgacccgtcctgcagcaccgggcgggaggcGagctcggtcctgcaacaccgtgcgcgagacgaggtcggtcctgctgcacc
IWB31782	chr1A	388.16	T/C	IWB31782,GCTTTGCCTCTTTTCCTTTTCTTTTCTTTTTAAGATTAACTGTGGTCTGT[A/G]GTCTGTCCAATGTACCCTGTGTTGTAAGTTATGTTATGTATGGATGCATC
3854224_1bl_428	chr2D	413.021	C/A	3854224_1bl_428,cttcttcggaggtggtgatgatggagttgacgatgtagggggcttgtcctCcttcttccaaggcataggtttaccatcttaaaaggatgattgagtctccg
IWB35253	chr1D	311.366	T/G	IWB35253,AACTCTTCTCTGTTTCGATGTTTCTTGTGATAAGAAACCTTGATTGTGCATCACGATCTTTGGAAGGTGGAAAAAGAAAATGTGAAAATGCATTTCCCTG[T/G]AC
IWB10049	chr1B	409.633	A/G	IWB10049,CGTTGTATGGTCAAAGTCTTTATTTCTGGAATTTGGTATCAATCAAACTA[T/C]TGATGTGCTGCAACTTAAAGTGGTCTGGTGAAAGCGCCTTGAGGAAATAC
3921908_1bl_3343	chr5B	45.9946	C/T	3921908_1bl_3343,cagtagagagcgcaccctgtgctcgccaggccacggcgatggtgctgcagCgtgcgctggcaagtagacggccacgcggaggcatcgggttctttgggcgg
3815696_1bl_537	chr1B	413.639	T/A	3815696_1bl_537,tcagatgaacagaacaaaatagcccttaaatactactactatggaggggcTttgtactacttatggcagcctctcctctgtcgagcgcgctcaataagagg
3839940_1bl_2006	chr1B	411.885	G/A	3839940_1bl_2006,gcagcaaatcactcacatctgcagttttctgatactcatgcatctctacgGctgctatctattcatctgcaatcttgcatcccttctgaaggcattcttct
3909010_1bl_6789	chr1B	420.591	G/C	3909010_1bl_6789,caacggtggacggttaaaaaacggagacggcggaggaaagtaaacgagagGagggtggagccgccggagtgcgacgcgggagaggtccccgtcagcgccga
3810446_1bl_1325	chr1B	411.782	G/A	3810446_1bl_1325,aaactgattgaactagtagcagagcattgcaatagatgtttagggcgttcGagcacaagtagcatagaagcagtgatctaaatcagcagacgctcgagcag
3909519_1bl_2675	chr1B	420.582	T/C	3909519_1bl_2675,gctggccccgcagcagaggccacgtgggctgcagcccgtcgcgaggaaacTagcccagcgctggggcccacctcttctggcggcgaacgcgcacaaggaat
3904406_1bl_2855	chr1B	415.794	T/G	3904406_1bl_2855,agaatttctgacaatggagcatcgctgacgactgaaattgaatgattagaTaaatagtgtgcaaccttcttcgtggtcaggtaaatcccgtagacaagctt
3913183_1bl_14936	chr1B	409.305	C/T	3913183_1bl_14936,gggaccggcggtttgttatgtgtaaattcattccttgcataccaaatcctCcacatgatcatcaaggaagccaacgtctgaacatccgacagtttttcaag
3826540_1bl_482	chr1B	410.675	A/C	3826540_1bl_482,aatagtaaataaaacagaaataccaaaggaaattgtaacgaaaggaaaaaAggaaaaaaggaaaaagaaaaagaaaagaaagaaagagaagagaaaagaaa
IWB8804	chr1B	412.896	A/G	IWB8804,TTTGATGATAATCTGCCTATGCCCAAAGGAATGTAATTCAACGTGTTCAT[T/C]TGTGGGTGCAATGTTTTTCAATAGCGCCAATTGGTGAAAAAGAGCAGTAT
3866644_1bl_1788	chr1B	415.786	G/A	3866644_1bl_1788,tggcgacttccacagtaacactagctgcagctgctccggctctcgcttgcGctgcggctctattcttgctgtcggtcgcactgctgcactgctcttgcttt
3847984_1bl_10170	chr1B	417.282	G/A	3847984_1bl_10170,tctgcttctcgaactctattgttccaaaagcccgggccatctggagctccGatttgacacacgcctcttgcttccctaagtcgatcttcttctcaatttgt
IWB192	chr1B	423.961	A/G	IWB192,ATGAAGCTTTCTATGTGGGCCTATATCATCATATTAATCTCGTTGATGTC[A/G]TCCATTGGGATCTCGAGGCCCATCAAGTCGAGATCCTGGAACCCATCGTC
3116875_1bl_169	chr1B	414.631	G/A	3116875_1bl_169,atttattcgtcgtccgcttcccactcaagccggatatagttcggccaagaGtctcctgacagggagagagattttaatgagtttagcacgtcacccaaggg
3884025_1bl_1177	chr1B	420.415	G/C	3884025_1bl_1177,atccttcagtgttgtggagaccgtgaccatctgaccgcgacccgcgcgcgGtgcaccagagaaggccgccctgcctggccccatgggcgacgagtttttcc
3810560_1bl_2862	chr1B	413.036	C/G	3810560_1bl_2862,ttttgttggaatagtttgcaatgaaaaaatctaggtctatttaagtcttcCtccttaagcttcgctagctcgtctgctccagtgcccgcaacccccgaatc
3919838_1bl_794	chr1B	413.63	T/A	3919838_1bl_794,attgaactagtagcagagcattgcaatagatgtttagggcgttcgagcacTagtagcagagaagcagtgatctaaatcagcagacgctcgagcagggaacg
3895709_1bl_10679	chr1B	419.026	A/G	3895709_1bl_10679,cccatgtgaccttatccatgacgcacctagagtacgcatgtatgaagaaaAggaagtcgagctcgatcagcgggatgatctggatgctctggaagaagagt
3913183_1bl_18677	chr1B	409.301	C/G	3913183_1bl_18677,ggcccgatgttgcatgttctgcggtggcgtacatcggtctggcggttcacCatcctgcagtttccgatggccagcatcaacaaccttgatgtttgcctagt
3856761_1bl_4567	chr1B	409.024	C/T	3856761_1bl_4567,cgtcgagagggcgtcgacggcagcagacagggcagctgcagcagtcgagaCggctggagctgttgctatgatggcggctgtcagtgtcagaaccagcggat
IWB69662	chr1B	415.221	T/C	IWB69662,TGGATCCACCCACCTCCCGACGACGATCCGGTCGCGAATCGGAGCTGCCG[T/C]cagctcccctccccccctgctccgctcgccgaacggacctgttacttcta
IWB10444	chr1B	424.415	T/G	IWB10444,AAGCAACTGACTGCTCGCTCTTGTTTGGATGTAGTCCGTTCAGCGTGTCC[A/C]AGGTACTGAATAATGTAGGTCGTCAGGTACTCGGATCTTGACGTGAGCAC
3792884_1bl_130	chr1B	419.2	G/A	3792884_1bl_130,tttgtagcgttttgttgtcttttcagttttgtcaggtcggtttgtacatgGcttatactatgatccttatgatataaatgagacacgtattaccatgtaaa
3882852_1bl_6813	chr1B	412.121	C/T	3882852_1bl_6813,tttctagggtttgcactcttcacacactctctctcaagtatatatatacaCgctggagcctcaacgcttgtagttgctctcttcacaaactctcaccctct
3813480_1bl_380	chr1B	415.6	C/G	3813480_1bl_380,tacgttccccaacaggtcaagtatatcccgggtccaagtaaatggattgaCtctcggcttatctatatcaaaaaagcgctcggccgcctcccagaagcgcc
3811417_1bl_2186	chr1B	415.387	G/A	3811417_1bl_2186,gtccagataataataccatatgcaagtatgacccatatcttcattctcacGaaatgtgatatacgcgggtgtgaatgcgtggatataggaaatgcccagtc
IWB56779	chr1B	426.073	A/G	IWB56779,AAGGGCAACTACCGGCTCATTCTGAATGCAAGCCTTTACGACGACATGAC[A/G]CTGAAGGACATGGACAAGAAGGGCGTGACGTTTGCTTGCATCAACAGCAT
3804526_1bl_2580	chr1B	411.212	C/T	3804526_1bl_2580,gccacgattcgttgtaagggcttagacctgcaggacgtgctccatggtttCagaggtagaatcgtaggcttccctatgacttatctaggcctgccgatcac
3921908_1bl_3401	chr4B	532.971	C/T	3921908_1bl_3401,ggcaagtagacggccacgcggaggcatcgggttctttgggcggtgctggaCggcgcagaaagctggctggttctcgctggccgccacgggtggctctgcca
IWB2565	chr1B	422.555	A/G	IWB2565,ACACAACTGTACTACAAGGAAATGAATTAGTGAAGAATAATTGACCTGTA[T/C]TCTCTGGCCGCAAATTCAAGTCATAAAATGGTAAATGTATTTAATGGGCA
IWB10555	chr1D	308.269	A/G	IWB10555,AATATGTCCTTTGTGTTTGAAGGTTCCAGTGTATTATTCGATTGAGATTG[T/C]CCTTGTGTGAGCCGATTGCATAGTTTCTGATGTGACACCTTATGCTTGGT
3793177_1bl_1234	chr1B	413.001	G/C	3793177_1bl_1234,ttggaaaacatggatgtgctacaggctgcgcttgttgccttcgtgcgtcgGgtcgcgcctaggtttatgtgcaatattgctgggtggtgggaaacggtggc
IWB60240	chr1B	426.45	A/G	IWB60240,CCCATGTTTTTCCAACGAGGACTGAATGTCTCGCTGTCCACGGATGATCC[A/G]TTGCAAATTCATCTGACAAAAGAGCCATTGGTGGAAGAATACAGCATTGC
3919096_1bl_694	chr4B	577.423	T/C	3919096_1bl_694,aatgcttgtggaataagtaaattatatcttaaggttcttggggcgtggttTggtgggtgatgggaaggcgacgaagaagaaggggtcggaggccctcccgc
3907202_1bl_8335	chr1B	426.678	C/A	3907202_1bl_8335,cattgccaagctcccgtcgtggccgagcagctgggtatcctccatagtttCaaatagcgcgctaagatcttagcggcggaccacttctaatcactatagcg
3894105_1bl_3183	chr1B	427.523	G/A	3894105_1bl_3183,agtccggtgaggccgcccatggctgcagctgcggcgccagctgcaagtgcGacccttgcaactgctaaggtgcaagcggtcgatgcgcttgtggtgattgt
3915171_1bl_8668	chr1B	428.068	A/C	3915171_1bl_8668,ttacgtgtactagtagtatttgtaatgatattggtttcaggttgagttatAccatgatatatactccgcatattgtaattctcccttcttatttttgcacg
3915171_1bl_8612	chr1B	428.068	C/G	3915171_1bl_8612,ccttcttccttgtctccacgtcggcactgcttcttgccgtatgagcgataCtgatcttacgtgtactagtagtatttgtaatgatattggtttcaggttga
3805096_1bl_540	chr1B	432.146	A/C	3805096_1bl_540,tttcacccaacggcatcgcgggagggcctccgaccccttcttcttcgccgAcgtcccgtagcccaccaaaccacgccccaagaaccttaaggtataattta
IWB6392	chr1B	428.113	A/G	IWB6392,TGATTTTAGAAGAGATTGTCTGGGTTGATGAGATCAACGGATTACTTAGT[A/G]CAACAAGTTATATTGAAGCTTGTAAAATTATCGGTGTGGATTGCGAATGG
3852652_1bl_1744	chr1B	433.136	A/G	3852652_1bl_1744,gctcgagagaaactgcagtttccagcgggtctggctcggagctgctttaaAgttcgtgtcacgcaggccgaacagtaaaagcagacaatcaatcggcctgt
3885755_1bl_4953	chr1B	430.235	C/A	3885755_1bl_4953,cctcagggcggtagtaccgccctagtgtgtgtacttcttctccctcagccCtggttgccctatgcctgcttgccacagcggtagtaccgctatggcaatgg
3838134_1bl_2295	chr1B	430.123	A/G	3838134_1bl_2295,taagaatttagactgatgagatgtaataagaagtacctcttagtttgattAtcaatagacatcattttacagtcttccgaatgattgttgtttatttcttt
3793561_1bl_1203	chr1B	427.772	C/T	3793561_1bl_1203,tttgttcacttcagttcagataaaccatttcaaagacacacacataggctCacacacacaaacaccaagtttcacaagtcaaaaggacaccaagagcaaac
IWB12547	chr1B	427.526	A/G	IWB12547,GCGCAGGCCGTCTGGTTAGTGTTGTGGTGTGGTTTGCTCTTTGTGTCCCT[A/G]TGATCATGTAACTTGTGAAACTATTGCTACTGCTTTGTGTTTGTGTGCGC
3805096_1bl_262	chr1B	432.146	G/C	3805096_1bl_262,tcatcacgtataagctgcagcctcggcacttgttttctagggtttgtacgGttcacactgtctctccagtatatatatacacgctggagcctcagcgcttg
IWB31964	chr1A	403.026	T/C	IWB31964,GATGGCAAGCAGACCAG[A/G]AGTTTCCAATACGTTTCTGATTTGGTAGGTCATCTCTAACCATGAGTGAA
3915171_1bl_8665	chr1B	428.068	T/G	3915171_1bl_8665,atcttacgtgtactagtagtatttgtaatgatattggtttcaggttgagtTataccatgatatatactccgcatattgtaattctcccttcttatttttgc
IWB10997	chr1B	430.169	A/C	IWB10997,TAGCCTGCTTAGTGCATCCAGATACACATTTTTTACCAGTTAATCAAGTT[A/C]TCTGTTCTCAAGTTATCTAATGAGTTCAAAAAAGTTTCTCTAATTTGATA
3830962_1bl_2977	chr1B	433.366	T/C	3830962_1bl_2977,acattgatgaaccggccatgtcgagcagtgagcgacaccgcaatcagcctTgtaggcctgacccgctacccgctggtaatgaggctcagactttggtgtac
3831346_1bl_10411	chr1B	428.175	T/G	3831346_1bl_10411,gtcgtcctgatagtaattagtgtcaataaggtggatgaaaaaggagccaaTagaatcaaagtctacctccaactcttcagattcatccacgttaaacgcat
3884244_1al_6978	chr1A	399.593	C/A	3884244_1al_6978,tgctccttcaatctctcagcccgacgcgaagcgtcaccagcagcagcagcCgccgccgcagctagagcacgcgcggttcaagctccagaagcccatctcca
3920628_1bl_371	chr1B	437.518	C/T	3920628_1bl_371,ccactgccgcaaccttctgtatccatgagatcccatcttggagcctttgtCggcgcttcgccggaggaggaatcgaccatggagggcctctacataatctc
IWB31700	chr1B	434.565	T/G	IWB31700,CACAAATGTGTAGCATTTATCACTGACAATTCTCCTGGCTCAGACAAATC[T/G]AATGTAAGCTACTCTAGCTCAGTAATATGAAATCTTTAGCCCTCAAATCA
IWA8065	chr1B	442.18	T/C	IWA8065,TTAGAGCGTGGGATCGGTGCAATGATCTCTGTGTTGGCCACAAAGCAATTGCCATATCCTGGAAATTCATTTGAAATGGTTCATTGCTCCCGATGTCGTG[T/C]TGACTGGCATGAAAATGATGGAATATTGCTCAAAGAGGTCGATCGTCTTTTGCGACCTAATGGATATTTTGTATATTCTGCCCCACCAGCTTATAGAAAA
3816066_1bl_1840	chr1B	460.206	C/T	3816066_1bl_1840,acgtacaaatggaaaagagaaaaacgcactggctaaagtgttcgaccagcCagcgcacgcgcgctgcagttttctttacttctttttttctgaactttttt
IWB44379	chr1B	459.925	A/G	IWB44379,AAGATCTACTTCCTTGCAGAGTCTTCATTTGGCATCGTGGATGCATTGTC[A/G]TTGCTTTGTTTGCTTGCTGTAATGGGCCTGGCTTCCTTTTCAGAAAGATT
IWB2709	chr1B	458.386	A/G	IWB2709,ATAACACCCAGCAAGAGAGTTTTACAATATTATTGTGCCAAAGGAAAATG[T/C]CAAAACATGGAGCTTTATAAGGTGCCTAATTTCACTTAAAAGATCATGGG
IWB31929	chr1A	441.765	T/C	IWB31929,GGAGACGCTCTACTGAGCTGATAGGGGTTTGAGTTACTTCTCGTTGAATG[T/C]GATGTCACATCTAATATAAACAAATAAATTGTGCTTTTATACAGGGAAAA
3816066_1bl_1624	chr1B	460.206	C/A	3816066_1bl_1624,atacctttatatggtagagaaaagacgaattcggagagaggagacaacttCtagaagtcccgccgtagaggagaaaaaaatatttttctttattgaatcta
3824159_1bl_1458	chr3B	454.945	T/G	3824159_1bl_1458,ggagagaaggaaagagggaaagagagaggtagtaggaaagggaaagggggTaaccgcccccttcccctagtccaattcggacccttgggaggggggtgcca
3883621_1bl_1496	chr1B	449.767	C/T	3883621_1bl_1496,aaagaagtcgcgactactataggaggaggagcctatgggtgctcctgcagCgatgaagatgcctacactccacaggacacgtgccaaatgtgacacttggt
IWB35532	chr1B	466.093	A/G	IWB35532,GTTTTTTTTTTTTTTTTTTGGCTGCAAAATGTGTTCCCATATGAAAATGCCAAATGTGT[T/C]GGTAACAAGGATGGATGCTACATCATTTCCCAGTTAAACAAGCACTGTGTGAAATATCTGAATATATCAGACCTCTAAGCTACAATTTGATTATATCCAG
3828095_1bl_4813	chr2D	103.438	A/G	3828095_1bl_4813,ggccacaattcgacgacgaggcctttgagccgtcaaagtaaaattatgctAatcaaccggaccgaccaccacgtggacgggacaaaacgactcatcatgcc
3894179_1bl_353	chr1B	467.121	C/G	3894179_1bl_353,gtatccggtggtacgattggacatggtctgcagcccccatagtacggagtCaagctcctcgacccaatgcgaatctgattccttcaaggatcgcactagtc
IWB72533	chr1B	471.194	T/C	IWB72533,CCGTAATACGCAGGAGCTGGTGTTGGAACCTTTCGAGTAGCATTAACACT[T/C]GAGGAGTTGACAGCTGGAGAAGCAGGTATTATGCCACCGGAATTGGTGGC
3881044_1bl_4549	chr1B	467.48	C/T	3881044_1bl_4549,tttgtcccctttcttctcgaattcctccgccacctctgctctcgcctcggCgtcgtcggtccgttcgagcttcgtctgcggcaatggtgaaggagaagacg
IWB57166	chr1B	469.974	T/C	IWB57166,AAGACCGACCATTACATGCGTTTAAGAAATCTTGAACGGCCAAATCACAG[T/C]GCTTATCATTAAGTGCAGGCACAGAACAGGAAGGGAAATCTAGTTGTCCA
IWB1296	chr1B	470.001	T/C	IWB1296,CAAAGGTCTGGGTGAAGCCGTGGCAAAATTTCAAGGCGGTTGTCGAGTTC[T/C]GTCATGCAGGGGACTTCCAGTCTGAGTCTTCTGTTGCTTCTGATGGTAGC
3889035_1bl_11982	chr1B	471.589	A/G	3889035_1bl_11982,gtgcgtcgagctgcagcctctcggcgctgacatgcctatcttgatccgcaAcactgaagcgccatgcaccaagggtctgctcagccctggcgatgacgcgc
3854607_1bl_1141	chr1B	467.764	A/C	3854607_1bl_1141,ggatcctcggtcgcccagcactatccaagttcatggcggcttcacactacAcctacaacatgctgaacatccccgggccgatgaacatcatcaccgtcccc
3816749_1bl_2448	chr3B	632.272	T/C	3816749_1bl_2448,ttagaggtggagtatgtgttcgggtccaacgccgctgagtgtgaggcctcTgtggcggggtccaccacccatcctcggattgcgcgatctgctccatattg
3805092_1bl_61	chr1B	470.309	G/T	3805092_1bl_61,caaattatatctcatctagatgagttctagcaaaactgtaatttgtatgaGacatacgtcatctcaggttaccagacggacacagggcactgtttgcccaa
3885410_1bl_4002	chr1B	475.861	G/C	3885410_1bl_4002,cacttggtagccactattgatgatttaaccgatatgatagactatagttcGgaagatgataaatacatggatgaggatggcgaagctacggctagtactga
3915780_1bl_3983	chr1B	476.92	G/A	3915780_1bl_3983,aacgaaatccctagctgggatgactaaataaagctatgcatgaagtttaaGaaaaaagcatctgtaacccttcaaccatgccacattctttcttcccacca
3822277_1bl_1403	chr1B	477.554	T/G	3822277_1bl_1403,gtttctcccaaggtcctttgctcatcgaagtctcctaggacattctttagTgcaaattcactgaatccaggctttatttcagtcatgtagtacttcacaca
IWB47330	chr1B	474.451	T/C	IWB47330,gaaactggattctcaaacatagacaccttgattgtttttgttcctttgat[A/G]CTCTTTGCCCACTTATTTTCATCCTCATCCTTTTTTGCTTTCTTGGCTGG
3885410_1bl_4356	chr1B	475.861	G/C	3885410_1bl_4356,gttaaccccgagggacaggaggacccgctcaacccggaaaacctcgatgaGtctgaagacagcaactacctcccacactctaaagaggaggacagtctcga
3880929_1bl_1367	chr2D	183.153	T/C	3880929_1bl_1367,agtcggtggagaataacaggaggtgttgaggggtggagggatagcctggaTagcggtggggtagtgcttcacaacgatgcatgctaagcagagccgccgga
3911889_1bl_2144	chr2B	734.447	A/G	3911889_1bl_2144,gtttgaaagagtctcattgtagtttttgccaaaaaattacaagtgcaacaAcactgaatcatctaaactcatcaaacatgttcactctcttcaccttcttg
IWB7443	chr1B	476.88	A/G	IWB7443,GCTACCATGTTTGACCAGTGGTTCTCGTGTCGAATTCGCCCTGATCATGT[T/C]GAGCGAGCGAACTGTATTTCTGTTTAGCATATAAGGTGTACTTCTGTTAC
3868546_1bl_9275	chr1B	474.68	G/C	3868546_1bl_9275,ttgatatttctttttttggaactgtctgctttggagtggttagcaaaattGtgtgctctgcttggggtaaatcgcatagctaaccttcttaaagcaaaagt
3838543_1bl_6616	chr1B	476.88	G/A	3838543_1bl_6616,gtaacagaagtacaccttatatgctaaacagaaatacagttcgctcgctcGacatgatcagggcgaattcgacacgagaaccactggtcaaacatggtagc
3845558_1bl_700	chr2B	324.556	C/T	3845558_1bl_700,acggagtcgagctcctcgacccagtgcgtgtctgattccttcagggatcgCcctagtctgggttcaatgccgctcataataagaccatttgcttgttcaac
3827650_1bl_1527	chr1B	481.052	G/A	3827650_1bl_1527,gccaatgaacttggcctttgcactggacaccttatagaaggtgtttgtttGtagatttatacccgtgggggcttcatgtgttatggagcccctggactact
3893907_1bl_604	chr1B	484.686	T/C	3893907_1bl_604,gggtcgtaattcagaggtaaacgagattgggttttctggtgtctcctcctTattacctcattagatgcgtttaagctcatcgtgagctggtaagcttctga
3797472_1bl_5395	chr1B	484.505	C/T	3797472_1bl_5395,ttttgccttgtttcaaaaaaaaaaggagtgcatgctttgcttaaaacgttCaaaacccggaaagaaaaacgtttagaagcaaatgataaagcgtatcctag
3795978_1bl_8504	chr1B	486.158	C/G	3795978_1bl_8504,gacaggaggtgaatataaattcccggccaaatcttggatgctctcacgggCttcaccaactctcacttgtccatgatcttgtccttgtgctgatcagcacc
3837621_1bl_4305	chr1B	484.302	T/C	3837621_1bl_4305,cactgatttttgccaaagtcattcgctgttcaaccatcagattaccatgtTtgtattatgtgccagtgtagttgtactgattctttggttttcatccgtgc
3827607_1bl_1840	chr1B	546.363	G/A	3827607_1bl_1840,tgctgtcaaaactgattgaactagtagcagatcattgcaatagatgtttaGggcgttcgagcactagtagaagataagcagtgatctaaatcagcagacgc
3844549_1bl_329	chr1B	546.303	T/C	3844549_1bl_329,tgtagcatgcctcggggaggcgtttaaaactgtttgcttggaacactatgTtttttaataattagattatgttccctggccctttccgtttgctttgttgt
3891988_1bl_3203	chr1B	546.37	G/A	3891988_1bl_3203,tactgtcgatatttatgcagcttactcatgcgtaggggaaaatttgtccaGaaaactcaaactactgccttccttggtatgcgggaggagagttatgcata
3823200_1bl_1764	chr1B	546.413	C/T	3823200_1bl_1764,tcgcggtagccgtccggacatggcagcagggcatgccaggacacccctagCccagtcaggcccgaaacgggcccgctaagccccacagccacgctgcagca
3844549_1bl_319	chr1B	546.303	G/A	3844549_1bl_319,tcctgcatcatgtagcatgcctcggggaggcgtttaaaactgtttgcttgGaacactatgttttttaataattagattatgttccctggccctttccgttt
3864513_1bl_2184	chr1B	545.368	C/T	3864513_1bl_2184,gactaatccacattttagtaggggtacccctgactaaaaaaatttagtctCaagactagatttagcccctctttagtcaggggtgcttggaactttagcct
IWB34737	chr1B	545.207	T/C	IWB34737,ACTGGAGCGCGGGTCAGCGGCAGCTTGTTTGCTTGGGAAGGGTGATTCTAAAGAGGAGACGGATCTTAGTTTTGGACGAGGCAACTTCTTCAGTGGATCC[A/G]ATAACCGACAGTTTGATCCAGAAAACCTTGAAACAGCAATTCGCCGAATGCACCGTGATCACGATAGCGCACCGTATCACATCGGTTCTTGATAGCGAGA
IWB39290	chr1B	545.208	T/C	IWB39290,ATACATGACCATTCCTTCTGAACCGCCCCTTACGATATCAGAAAGTAGGC[T/C]GGATTGCCATTGGCCAACAAAGGGTGAAATTGAGCTTCGCAACCTCCATG
IWB34917	chr1B	548.197	T/C	IWB34917,GGCATAGGGGGCATATTAATCTCCTGTAGACCGTCAAGAACCCGGACCACTTCACCCATAGTCGGCCGATCAAACTCATTATCTTGGATGCACCAGCATG[T/C]AACTTTGCAAATCCTTTCAGACTCTTCCAAATTGAAGTCACCATGCAACTGTGGATCCACCAAACTCTTCACATCTCCGTCATGAAGCTTGCTGATGGCT
3806817_1bl_2215	chr1B	547.525	C/G	3806817_1bl_2215,ggccaagcagacgtacgtgcacactgacacccacatccgtagtgccctacCggcctagctggtttgctttccagccgaaccaacccagcttctgcagcttc
3803772_1bl_1023	chr1B	547.389	G/A	3803772_1bl_1023,ccagagctgcagggtcgatccaaaggggatcgccggtgagctcggctccgGgatggcatcccgcggcctgcccggacgggctgcggcttctagtggctata
3875125_1bl_13444	chr1B	548.541	A/G	3875125_1bl_13444,tctcatggaacgaaagggcaatcagtgagtacaactgatatgatgttcttAtgtcttgatactatgcttactcatataatagcaatagaaggaggttaata
3838043_1bl_1055	chr1B	548.405	G/A	3838043_1bl_1055,ccggtcgagtggagaacgaatctcccactcggaggcttagctgcagcccaGtactcgcctaaacatgacgagtataagtcgattacagtttgtgtttcgtc
3909273_1bl_2074	chr1B	546.675	C/T	3909273_1bl_2074,tgtctagcgacggtagggcatcggtgggctgctgcagccttgttaggctgCagcctggcgcttgcgaaggagccgctccgcttcctcctacgtgatgcgga
IWB72079	chr1B	547.968	A/G	IWB72079,aatgaatggaacttcaaatttgtgggtatgtagcatgttcaagacattca[T/C]GATGTCACTCTGATCAATCTCCTTGTTCAATTGCCCATTGCCAAAAAGGG
IWA4089	chr1B	548.971	A/G	IWA4089,CCGTCTCTCCTCCGACCTTTCTCGTTCGTGACGTGCCGCGCCTCCTCGCGTTTGAGCGACTGTTTCCTTCCCCTTCCAATTTTCTCTTTTCCTCGTGACG[A/G]TTCGTCGCGTCTGATTTTATTTCATTCACCCGCCGTCGCCGTTGCCTTGATGTGCTCGCAGGGGATTCGAATTCGACGACTTGTCTCTCCTCCGCTTCCG
IWA6731	chr1B	548.627	A/G	IWA6731,TGACCGATCGAGCACGGGAAACTGACCTTGCTTCGGCCCTGGGGTCACCCGAGACCAAATCAGACGCAGAGGCAAAACCGACCAGCTCGACGGAATCCCC[A/G]ATCGATCGATCCCGGAGGCGGACGAGACGGGCCGAATCCCCTGCGAGCACAGGAGGCAGAGGCGACGAGGAGCGAAATCAAACGCGATTCGAAACGAATC
3916344_1bl_8587	chr5B	17.4928	A/T	3916344_1bl_8587,cgcaaggtgcatcgtccatcactgcagctccgtcatctacaacatagcgcAtttttttgcacctccggctttgtgcggcttcatcatccacgacgactaca
3920229_1bl_2191	chr1B	549.454	C/T	3920229_1bl_2191,cttcttgatgtttctgtctaatgtatgctgctttaggcttccatgatcacCattcagtaacttgttcttgaacaaagggttcagcaacttcagtttgaata
IWB2605	chr1B	548.674	A/G	IWB2605,CGAGCTTTGTCTCTAGAGGTCTTTCACCTGACCGTAGGATAGCCGTCGCC[T/C]GTTGAGGATTGCAGTGGTTGAAGCTTCTTCAGTTTCGTCGGACTTGAATT
3867427_1bl_83	chr1B	549.719	A/G	3867427_1bl_83,gatgctcgggtaaatgaattttgatttagagccttcctttttaaagacagAgggaacacatatattaccatttttgcagcaaaccagaaatatgttgaaac
IWB40059	chr5D	152.316	A/C	IWB40059,TTCTCACCAAAACCTAAATTTTGCCATTGGTTGTAATGAAAAGAGGGCCT[A/C]AAATTTCAATTTAATATTACTTGTACCCACCACAAATATGAAGACATTCC
IWB31680	chr1B	551.013	A/C	IWB31680,AATTCATCATCTACTTATGTGCTCTGTAGTCCCAGAAAAACATTAGCTGA[A/C]TAGTGACGAGCCAAATCGTTATGTGATCTRGCTACTGCAACATTAC
3830384_1bl_351	chr1B	550.288	C/T	3830384_1bl_351,nnnnnnnnnnnnnnngaaagatgggaggagagggggttaggcggggggaaCggcgccgccgcccatgtcgccccggaagagcgacgcgggggcagagttga
3874950_1bl_6251	chr1B	550.245	C/G	3874950_1bl_6251,gtataggatacatctccgagaggtggaaatgcaaatttgcaccgtgaactCttatagaatacatctacgggagatgtaaagacttttgcatctacatcatt
IWB31681	chr1B	551.013	A/G	IWB31681,GAAAAACATTAGCTGARTAGTGACGAGCCAAATCGTTATGTGATCT[T/C]GCTACTGCAACATTACTTCTCTAGTAGTGTAATTGGCCTATGATTCTAAA
3862637_1bl_2980	chr1B	549.905	C/T	3862637_1bl_2980,tgcagggcgagccccttcttgcttgctcgctcatggagggatcccagtttCagaagtccacccagtgcatcaagttgaaaatcgtcctaggggtttcttgt
IWA5635	chr1B	551.012	T/C	IWA5635,TGGGTGTCTTTGAATTTGACAAGTTTGCAGTAGGAACTGAGTCTATTGCAAAGAAGTTGGCCGAGCTTAGCAAAAAGGGTGTGACAACTATCATTGGAGG[T/C]GGAGACTCCGTTGCGGCTGTTGAGAAGGTGGGAGTGGCTGATGTTATGAGCCACATCTCAACTGGTGGTGGCGCTAGCTTGGAGCTGTTGGAAGGAAAGG
IWA4361	chr1B	555.64	A/G	IWA4361,GGGTACATCGGATTCATGTTATAGGCCATGTTGCGGAAAGGGTACTTCATGGCAGCCTCGTTCATCTTGAGATCATTCATCTTAAGATCCAGGTTCATCA[A/G]GCCAAGATTGAGGTGGTCCATCTTGTTGTCTTCTTGGTGGTAGGATAGCTTATCCCATTGCTTGACATCAGGGACGGTGTTCATCCGTGCATACTCAAAG
IWB35960	chr1B	555.64	A/G	IWB35960,CAATGGGATAAGCTATCCTACCACCAGGAAGACAACAAGATGGACCACCTCAATCTTGGC[T/C]TGATGAACCTGGATCTTAAGATGAATGATCTCAAGATGAACGAGGCTGCCATGAAGTAC
IWB10373	chr1B	551.222	A/C	IWB10373,ACGCACTTTTGCTCTCTGCTGAGAAATGGCCACACGGAACAAGAAGAAAA[A/C]GATGGGGAGGCGTCTTAACGGCGGCAAGGCGCCGAGGGCACTTCTCCTGC
IWB10372	chr1B	551.222	T/C	IWB10372,AACGATGGGGAGGCGTCTTAACGGCGGCAAGGCGCCGAGGGCACTTCTCC[T/C]GCGTCTGGAGGCAAAATGGCCAGCTTGCGACGCTCGCCCGGCGACGGAGT
IWB54285	chr1A	508.555	T/C	IWB54285,CGTGAGGGTTCACCAGCTCCGGGCTCCACTCGCCCACGCTCGGCGAAACC[A/G]TGCACACCTCGCTGCCCTTCAGAGTGGGCGAAAGAGCGGAGTTCGACATT
3859439_1bl_2195	chr1B	556.29	A/G	3859439_1bl_2195,tggaataggagaagatctaaaggttggaggggggggggaatacctggattAattcctattcttctcactagtagaaaacagggcatttgtcccggtttgta
IWA3684	chr1B	562.375	A/G	IWA3684,AAACATGATGCCATTTGGTGGACCGCCGGTAAATCATCCTTTTGGTCAGGCATCTCAATTTCCTATGGGGCAAGGCAACTTTGGTCAGTTTCCACACATG[A/G]CTGGCAACCAAGCGCCACCTGCTGGATTTCCCAACACCCCAAGGATTTGGGCGCTTCCCATCACAACATGAAGATGGAGATCAGCCTCCTGGAAATGCAA
3916791_1bl_3033	chr1B	563.121	C/T	3916791_1bl_3033,tcagcggcgccagcgaggacccggcccacatcagcgatcccgccgcgtcgCcggcgggcgggacggcgaaccgtagctcgtgcagcttcgtgctcttgcac
IWB10880	chr1B	563.537	T/G	IWB10880,GGTCCATGGGATTTCGTACTTCGAGACTAGTTTCTCTAATTTGATGATTC[T/G]TCTGGATGGCTAAAAGTGTCCGGATGACCCGGTCTAGACATTTGTGGGCG
3882926_1bl_60	chr1B	563.391	A/G	3882926_1bl_60,caattatcgtcatagaagtgtcatatgtatgacagaaaaaaaattcgttcAgcccaaaatgtcacggatgtgtcttgttttgtagtgcacctccaagaaag
3791501_1bl_12767	chr1B	563.444	A/T	3791501_1bl_12767,ttgctagctgcagcagcaaccttccaggaccaagcaaatggcaccgactcAgaagctcaggatccttgccgtggccgccaccgccaccgttgtggcatcgt
3854404_1bl_10602	chr1B	563.985	G/A	3854404_1bl_10602,taagatgtgcgttcgttcgtagaggtgagtgtatgtaagcaacttcaattGtagtttgtttaaaaaaaaggaaataagtggggtcgtgtttttcttttcta
3751458_1bl_2089	chr1B	565.898	C/T	3751458_1bl_2089,agattctgcagcattttgccaccgcgagggtcataaaaggacgatatgccCagaaagaggtgatgcaccgggaaagccacaaaaacctggcaaatgcaaga
3860220_1bl_993	chr1B	565.688	A/C	3860220_1bl_993,aatgcgatgcatcgaggatttaacttcaagttagttgactctagaggtttAggccttgtcccagagtcagctgtacctgattttggcgtgcacataagggt
IWB22510	chr1B	565.67	T/C	IWB22510,CGGCTCAGATGATAATGATGCCTGGGCTAAATCTGCTACTTTGCCTGTTG[T/C]TCAAGATGATGCCTGGGGGAAGTCAAAAGAGTCAGGCCAAAACAGTGGCT
3793148_1bl_2492	chr1B	564.653	G/A	3793148_1bl_2492,attccttgcataccaaatcctccacatgatcatcagggaagccaacttctGaacatccgggagtttttcaagcaggcggaatatccactcgggttcggcgt
IWB9482	chr1B	564.691	A/G	IWB9482,TTTGCATGGTTACACCTTGATAAACTGTGCACCAACTCACATGACAATAA[A/G]TTGAATTCAAATCTTTGTTGGGCAGAAATGGTTCACTTATTTAACCAACT
IWB71367	chr1B	565.673	T/C	IWB71367,TTGCTGTCCCATCCGCCACTGGCCGCCTTGTCCCAGGAACTGCCGCCACC[A/G]CCACCTTGGCTCCCGCTCCCTTCGGCCTTGTCCCAGGATCCTTCCTTCTT
IWB5926	chr1B	564.909	T/C	IWB5926,CGGTTGCCCGAGCTGAGCAGCTTCTCAGTGAGCTCGGTCCGACGACACAT[A/G]TTTCATCGCCCTTTGATATTGGCTTGAGTTTCACCGAAGAGATCATGGAG
3823653_1bl_5190	chr1B	566.017	T/C	3823653_1bl_5190,atctccctcgcgcttccactccgcctcgttccatccctgtgctgcagcctTcttgtctttctgcacgctctcaccgtcgttttcgctatggccggctgctc
3823653_1bl_5804	chr1B	566.017	C/T	3823653_1bl_5804,ccaagtcttcgacgtcactgcaactctatggtgttttatgagagagcgaaCagttgcatgtctgctactaggcagacaactgcaagtgtcaccccgggctg
IWB8187	chr1B	565.991	A/G	IWB8187,GGACGGATTGGCAGAGAACTTCTACAGCCAACGCTTGAGACCGATCAGCA[T/C]GCACACACACTTCAGGTTGGCGGAGAACTTCTACACCCAATGCTTGAGAC
3895655_1bl_2637	chr1B	566.18	C/G	3895655_1bl_2637,caagtgacatgattggcctgcaactgcaatttagtcatgagggctcagtaCgtgtagtttgttcgcgttagcatcatcgggggcaatgccgccgctatggc
3895655_1bl_3013	chr1B	566.18	C/G	3895655_1bl_3013,caaccacttgatctgcagcttttttgttattaagctagccccaaaacgagCtgcggaaaacaagggaaatggttgcccacgacgagcttactaatcgtgcc
3895655_1bl_11619	chr1B	566.171	C/T	3895655_1bl_11619,cctccgctgccttggaagcccatgccgctctcctcctgcagacgagctgcCgccttggtcaggctgcctgtggcgtgcaaaccactcctcttcaatgagaa
IWB47726	chr1B	566.604	T/C	IWB47726,CAGCGTTTTTACCTYCTGCCCTGAAGGATCCACCTGCTGTTGCTCATGGC[A/G]TGCCTTGGGATTCTGCCTTTCCTGGAGCTGTTGCGAGCTGGATAATGCAG
3867690_1bl_1548	chr1B	566.6	T/C	3867690_1bl_1548,gacagctgctgctaggaaatatgccctagaggcaataataaagttattatTtatttccttatttcatggtaaatgtttattattcatgctagaattgtatt
IWB70037	chr1B	566.839	A/C	IWB70037,ataaagctattccagtcactccaaaatctccactgactgataaagctact[T/G]CAGTTCCTCCGAAATCTCCACCAGCTGCTAAAGCTGCTGTGGTTCCTCTG
IWB72730	chr1B	566.763	A/G	IWB72730,GACGAGGACCCCATGTGCAAATTTCAACTCATTGGTATGGATAGCTCACC[T/C]GCTTCTAGCTTCGCTCTTCAGGCTCCCTTGATAATAACATCTTCCTTTCC
IWB8944	chr1B	566.836	A/G	IWB8944,CGGGGGCTCGCCCGTTTATAACTTGCCCCACCGGATCCCAATCCAAGAAA[T/C]AGGGAATCCCAGCTGCACAAGCATCCCCTCTCGATTTGTTAATCAAAATT
3902003_1bl_4028	chr1B	566.687	C/G	3902003_1bl_4028,aggcagcacagcgcagaagaagtgttgcaaaattatgtaaagagatatgcCatcaagacgtgtttcaatatatacaccattacacaggattgaggcaaaca
IWB164	chr1B	566.688	A/G	IWB164,GACGACCAAGGTTGGGCTACACGCGGCCCAGTAATCACCTACCGGAGTAG[T/C]ATTCGCCTAAATAAAATTGCCGCTCAACAAGTAGTGCCTCTAATGGCACC
IWB21824	chr1B	566.839	T/C	IWB21824,GCTACTCCAGTTCCTACAAAATCTCCGCCAACTGATAAAGCTATTCCAGT[T/C]ACTCCAAAATCTCCACTGACTGATAAAGCTACTTCAGTTCCTCCGAAATC
3861236_1bl_3494	chr1B	567.116	C/T	3861236_1bl_3494,tcttcactttcttatctgcagggatgaactcgatattgttgaatcatttgCgtcaagcttgttgtttaactttatacttctatcatatacatgtaagactg
IWB48875	chr1B	568.523	T/C	IWB48875,AAGGTCAACGAAATCCTATCTCATTACCCAAGCAACTACAAGCAATCTGG[T/C]ATTATTCCAATGCTTGATCTTGCACAGCAGCAGCATGGTGGATGGRTCCC
3907914_1bl_5251	chr1B	568.006	C/G	3907914_1bl_5251,gagttctgcggcgagggctgccagaacggcgcttgcagcaccgacaagccCtgtggcaaggacgccggcggcagggtttgcactaacaactactgctgtag
3803116_1bl_3838	chr1B	566.979	C/T	3803116_1bl_3838,tccgagctaaacagttgtgccacttgccagcgacagcatgcctgaatgtgCctcttttcttttggatggacgtgctgttggccgcatgtgatttgtaactt
IWA2790	chr1B	568.569	A/G	IWA2790,TTTGTTATATTTATATAGATCTCAAAAGATTTCCATCCTGACAAATATAGTCCCCAACTCCTGACAAATTTATTTGAAATTTCTCTGCAACTAACATCTA[T/C]CAGGTCATCAAATTTACAGCTACTGTAGCTTTTGTGAATTTGTCATGTCATTTCGTTTCCTCGCTTGGTATACTTGTTTTATGAATCATGCGGTCTTCTG
IWA1729	chr1B	568.525	A/G	IWA1729,CCCATGCAGGGACCTGGATGCCTGCTAGTTTTGCTTTGAGTTGCAAGCACACAAATAAGTCGGCCTGCTCGCACTGTATGTTGCGGAAACCGTGAACAAT[T/C]GATAGGCGATTTGATCTCCTGTTGTTCTCAAAGCTTTCTTGTGGCCAACAATGGACATGCGATTTGATTGATCTTTGTTGTTGTCGAAGCTTTCTTTTGT
3821269_1bl_1476	chr1B	568.93	G/A	3821269_1bl_1476,cgtggacttacgatgctgtcaaggtggtgcttgctgcagacagggtaactGatacgaaatatgggaaactgcaggttagttctggtttgtttctttacaca
IWB8901	chr7A	36.5448	T/C	IWB8901,ATCTTGGTTATGAATCCATGAACTACATCACCTATCACACAGCTCTTCAC[T/C]TGTCCTGTAGCACCAATATCAGCAGGATAAAGAAGCCACCGGTTAATGAG
IWA2788	chr1B	568.968	T/G	IWA2788,CTCAGATCATGCCTGGGCTGCATTTGCTTGCTTTTTCTTTATTAAGAGGCATTGTTGTAACTGTATGGGTATAAGATGATACATATACAACACATGTCAC[A/C]GAAGGGAAATGGAAATACTGATAAACCACATGAAAGATCGTTTGATTTCCAGGGTG
IWB3990	chr1B	568.969	T/C	IWB3990,AACTGGAAAACATTATATTCAAGCTTTTCGAAAAGCAGCCTAACTGGGCA[T/C]tgaaggctctagtgcaagagactgaccagccagagcaattcctcatggga
IWB21657	chr1A	517.099	A/C	IWB21657,ACAATGACGGCATTGATGGTCAAGTCAGGAATATACCGGAGATCTGTATT[A/C]ggggtgatggtaagattcgactggttaaatctggggagagtgctgctagc
IWA7527	chr1B	570.296	T/C	IWA7527,AGATGGAAAAGTTTGCYGGTGGACTTTATACAACCAGTGTAGAGGCCTTCATTCCAAATACCGGCCGTGGTATACAAGGTGCAACTTCACATTGTCTTGG[T/C]CAAAACTTTGCAAAGATGTTTGATATCACCTTTGAGAATGAAAAGGGTGAACGGTCCATGGTGTGGCAGAACTCTTGGGCATACACTACCCGCKCGATTG
IWA5159	chr1B	570.277	A/G	IWA5159,TCCCTCTTCAAATTCCTTTTCTGTCRGTGAGTTGTCTACCAAGCTGTGCAGCTCTGCATTCATGTTGCCCCTTGCTGCCATGAAGGCCCCTAGGATTTCC[T/C]GTGCTTTTCGCATCACGCTGAACTTGCAAAGCCTGTGTCTTACTTGTGGCATGACCTCTGCAAYTGCTTTCACCATACCTTCATCCTGGTCTATTATGAT
3804366_1bl_913	chr1B	569.933	G/A	3804366_1bl_913,ggacgctgtcaaggtagcgatgactccacgctcgtgttcaagcagcagaaGgagaagatgagctacatagtcgagttctgcagccatggtcaacccatagg
IWA2586	chr1B	570.296	A/G	IWA2586,TATTTGCAACTAAAGAGGAGGCAGATGAAGAGGTCCTCCAAATATTGGAACTCTACAGGAGAATATATGAAGAATTTTTAGCAGTTCCAGTGTCCAAAGG[A/G]AGGAAAAGTGAGATGGAAAAGTTTGCYGGTGGACTTTATACAACCAGTGTAGAGGCCTTCATTCCAAATACCGGCCGTGGTATACAAGGTGCAACTTCAC
2243173_1bl_1618	chr1B	570.302	A/G	2243173_1bl_1618,aatccaccatgcacccaaatcgaattgtaaataaacgtcaccaagccagcAaatagcaagaagacgcgcctcagagtaccactccccaaagttatcatcct
IWB34907	chr1D	420.652	A/T	IWB34907,TATGAACAGCTATTCGATGCCACTGAGCCGGCTTTGGTGTATCCGCAGACCCAATTACCCTCTGGTCAAACATGCCACCAGTTCCAATAGTAAATATAGT[A/T]ATCGTCCGCCCATTACGTAAAATTTTCTGCACAGGCGCTTGTCCAACTTTACCACATATTATAGCCCTANNNNNNNNNNNNNNNNNNNNNNNNNNNNNNN
IWB3338	chr1D	420.652	A/G	IWB3338,CTACAGTTTCTTTCTCCGATATTGATGAGAAGGATGACATGGGTGATGAT[A/G]GCGATTTGAAAGATTCAAGGAGAGAGTTGGAACCCCAAAGCGTGGACCCC
IWA5160	chr1B	570.277	A/G	IWA5160,TTGCCCCTTGCTGCCATGAAGGCCCCTAGGATTTCCYGTGCTTTTCGCATCACGCTGAACTTGCAAAGCCTGTGTCTTACTTGTGGCATGACCTCTGCAA[T/C]TGCTTTCACCATACCTTCATCCTGGTCTATTATGATTGTTTTTGGCAGTTTCCCTCTCATCACATGCAAGAAAGTCTGGAACATCCATTTGAAGGTTTCA
IWB48255	chr1B	570.841	A/G	IWB48255,TGACTCTCCTAACTAAGATTCGTCCTGGTTGCTGATGTCCATCAACAGTT[A/G]ACAACAGGCTTTTATTGATTCAGACAATAGCAACTTCACGGGAGCGCCAG
IWA2041	chr1B	570.841	T/G	IWA2041,TGAGACTCATGTTAATGAAGTAGAACAGTAGGTTTCAGGAGATAGGTTGTCTATCCATGTTGTGCCCAGGATTATGCTGGCATGAATCTATCTTTACCTG[T/G]GGTTTCATATGTCAACATTAACATTTACCTGCTTCACCTTCTGAGAATTGCATAATGTCAACATGGCTGATACTTCTACTTTACCAAACAATTAAACATC
IWB34775	chr1D	422.056	A/G	IWB34775,GGATATCGTCGACCCACGCGTCCGGACTGAGAAGGTCCATATCCTATTCTATATACTGAGTTCCAAAACTCAAAAAAATAG[T/C]ACAAATGGTTACTCTTCTAGTGCAGTTAAATCTTCCAACACCAATGGGAATGGCATATCAAGTGCCGCATGTAGTGAGCCTCTGAAGATACCATTAGTGA
IWB27264	chr1B	572.675	T/C	IWB27264,gctctatttttatttgcacgggataaaggaggtggatctatgccgccatt[A/G]GGTAAGCCAAGGACACAATGCACAGCATGGGGTGTAATCTTAAGACCACC
3915060_1bl_13731	chr1B	571.702	G/A	3915060_1bl_13731,cattttgaattaataaaatcgccctttatcaacaaaaaactaatttagaaGtataaaaaaaggttattttttaaaccggggagcggtagcttattttttaa
IWA4090	chr1B	570.842	A/C	IWA4090,TGCGCTGATTGAGAGATACAGTGCAAGTGAAAATGAGTACCTGCAACTCCTGTGGGAAAACAAGGAAAGAGTGGGTGCCTGTTTATTTCAGAGAAGATTT[A/C]TATCCATTTGTGGAAACGACTGGATGTTGCGAGGGGGCAAACTCATTATTCAAGGACTATGTGCTTCCTAAGGACAGAATAGAGAAGTTCCTTGAAAGAT
3794643_1bl_864	chr1B	570.995	G/C	3794643_1bl_864,aggagaagggcgaaggggccggccccctctagatgagatctagaggggggGcaaggggagggggcttgccccccaagcaaggggggcgccccctttagggt
3863280_1bl_5293	chr1B	573.007	T/C	3863280_1bl_5293,ggtgtgcacgtgggctggatcggcgtgttcacattggccagcatgcgctcTctggattgattcgttgatttggttacgtgatctttggcgttttcatgttg
3872315_1bl_1004	chr2B	368.928	A/C	3872315_1bl_1004,tggaccccagaggccgaagcagcgctgcaggatttgaagaaatacctctcAtccacaccgatactggttgcgcctaaaccacaagtgccgctgctgctgta
IWA2040	chr1B	570.841	T/C	IWA2040,TGTATGCGGGCTCTGAGAATTGTCGCTTTGGCAGCAGCAGCGGCTGGGCACTGGCGCTCCCGTGAAGTTGCTATTGTCTGAATCAATAAAAGCCTGTTGT[T/C]AACTGTTGATGGACATCAGCAACCAGGACGAATCTTAGTTAGGAGAGTCAGTTAAATCGTTGTCATTGAGACTCATGTTAATGAAGTAGAACAGTAGGTT
3872315_1bl_691	chr1B	571.912	C/T	3872315_1bl_691,aggacaaggcaacacttgtacgaaatttggaagagacgtttgcaaatttgCgcaagatcaacctcaagctgaaccctaagaagtgcgtcttcggtgttccg
3863280_1bl_7019	chr1B	573.009	T/C	3863280_1bl_7019,cggcatgcagcataggccagtgtcgtcggcgtactggctccgaggtagcgTgttgaacccatgctgcaacatttctcctatgagtctgttgtcagaggttg
3863280_1bl_2701	chr1B	573.004	C/T	3863280_1bl_2701,atacaattgcttttcgatctcaacaatgtgtgtttgtcggctatagcattCgtcacaagggctacaagtgtcttcacttgcccacagcccgtgtttacatt
IWB596	chr1B	581.21	T/C	IWB596,tgaaatctctcaaacactgatccctggagtgaagaataattggggaactg[A/G]AGAGTTGATGCTTGATCTGAGGCGTGGAATGACTCCAAAATATTATTGTC
3798770_1bl_5885	chr1B	574.736	T/C	3798770_1bl_5885,gaatggattccggtgatggagccctgaaagaattcgcccggcaacagcgaTggcagcgcgcaacccctccttgtccagctcagcccccaccatcacgcgga
3889291_1bl_1424	chr1B	578.799	T/G	3889291_1bl_1424,ctagtgcattccctgctcgagcgtctgctgatttagatcactgcttctctTctactagtgctcaaacgccctaaacatctattacaatgccctgttactag
IWB66369	chr1A	527.974	A/G	IWB66369,CATGCGTGGCATCAAGCCGCCGCAGCGAACTTCATCTCCTCCTTGATGGC[A/G]gcggcgagctggtcgtaggcctcctcccaggccgccttcatctccagcgt
3792651_1bl_5193	chr1B	574.324	G/A	3792651_1bl_5193,acatgccgacgctgcagcgcggttggctgctttaaacgatagtttgtggcGttttctcgaggccaccatcggtgccttcgacaaagactacgaggtgtttt
IWB47806	chr1D	430.417	T/G	IWB47806,AAACAGGCCGCCTGCCGACAAGGTGCTGGACAACCTGATCTACAACTACA[T/G]ccctacattttccgggaaaacctcgaaatccttcgagttggtgtacctct
IWB43219	chr1B	575.864	T/C	IWB43219,CCATTGTTTCGTCGTGAAGTAGGCCTTTACGCACCGTTGTCTCCCACGTC[A/G]GCAACAAGATTGAACGGAGAACTACTGAGGCATGTCGAAGAGGATGTGAG
3845402_1bl_2428	chr1B	575.229	T/C	3845402_1bl_2428,ctccacgcccccctcccgatgcctccttcgtcggcctatggaagctaaagTgaaagcgacccactccaatcgaaatgcccaccatggaatcccttctcata
IWB10982	chr1A	531.225	T/C	IWB10982,AATCACTGGACCACGTGGCACGTTATCAAGCTTTGCAAAAAGAAGCGAAA[T/C]AGATCTATCCAGTGATTGGTCCAAGGATTGGTCTTCACCGTCTTCATCAA
IWB7953	chr1B	583.984	A/G	IWB7953,AAGCTCATGCAGCAGCTCATACCCTACACCGGCGTCATGAACCTCGAGGG[A/G]ctccaccgcccgctgcttgcggtccagttcaccaagctcaaggacggcct
3862431_1bl_2996	chr1B	584.169	C/T	3862431_1bl_2996,ggtcaacaaacaaagactgcgctcagttctccagtctgctcatgccagcgCcgcgatagcgcatcggccgctcgattcaagggtcccgccttgtattggat
3830784_1bl_5242	chr1B	583.855	T/C	3830784_1bl_5242,tcgcctattcattcatctcccnnnnnnnnnnnnnnnnnnnnnnnncttttTtttttgcgagaagtggtgtgttcagctagcagctgcaaggttaattagtt
IWB46336	chr1B	584.109	A/G	IWB46336,ATCTGCTACATCCAACCCCACAGCCACGATGTTAGTGGGTGAAGTCTGAC[T/C]AGCATCTGCATTCACCTCGGCATAACTCAGAGGGTCTGATAGTTGTCTCT
3848238_1bl_2367	chr1B	586.109	T/C	3848238_1bl_2367,gcgcagaacattaatcagatcttccaagccgtaaagttagcacgggtggcTgtgggtgggtcgtagttgcacgtcctcacgtctacttattgggcccttaa
IWA5382	chr1B	586.292	A/G	IWA5382,CAACTACCCCCTCTTGATGTTCCGCTCCCAGGCATTACCATTCCTCCACCCCTACCAGATTTTGTTGAGCAATCCAAGACAAAAATCACTACTCTTCCAA[A/G]TGGCATCAAGATTGCATCAGAGACATCACCGGGCGCGGCTGCATCAGTGGGTTTGTACATTGACTGTGGTTCTATTTATGAAACACCTGCTTCATCTGGA
3800997_1bl_273	chr1B	585.943	T/C	3800997_1bl_273,ctttctgcagctttggaagcttttggcaagaacaagggagcgaggaagggTggagctcctcnnnnnnnnnnnnnnnnnnnnnnnnnnnnnnnnnnnnnnnn
3840401_1bl_4831	chr1B	588.503	T/C	3840401_1bl_4831,ccgtagttcgggtattttgtagtgatactaaactgtcaaccggctcaagtTtagtgatctacggtgaatttttctcaaaaagaaatgcaagggctgcctct
3902145_1bl_4097	chr1B	593.829	A/G	3902145_1bl_4097,ggctcagggatcagtctgctgctagatcccgtttactttggcccaaatctAgaatacatattgcattattacagagtaaagtccaaatctgaaagttaaac
3908808_1bl_2589	chr1B	593.674	A/G	3908808_1bl_2589,gggactccccggcctctgcatcagagcgatacatacgactaaatttataaAtagataaagtagtttaacaaggtcttgcaaactgctgcaaaaatgtaggc
3902145_1bl_5924	chr1B	593.831	A/G	3902145_1bl_5924,gagctcagaaaggtgcaccatgcaggaccagaacgggtataaatgcccctActgcagggtgatcactaaccatgtgtgctccccggatcaaacagagtttc
3829492_1bl_508	chr1B	593.668	C/G	3829492_1bl_508,tggaaggagagatggccgtacgtagcggcatgggccagcaggaggccggcCgccatggttgctgtctccggtgtggggagagagaggaggagaagggagtc
IWB29471	chr1A	534.932	T/G	IWB29471,CCAGTTGACTGTATTCACTGGACTTCTGCTGCACAACTTTCACTCCTTGA[T/G]agtgaaacacgaagaatagaaagggtcaatgttgggctgatgaatgctgg
3800716_1bl_924	chr1B	593.879	C/T	3800716_1bl_924,cgcaggctgcaggtaggcaagtctggatacccccatatccaggacgccgaCagcagcggataggaccccgccggtagctgtgggtttcctccctcgacggc
3865300_1bl_9151	chr1B	593.851	T/C	3865300_1bl_9151,ctctggctctcgctcgtgttgcggctctgttcttgctgtcggtcacgctgTtgtactgctcttgctttcgtttgtgccgctgctctgctctttctcttgct
3807515_1bl_6239	chrUn	8.08999	T/C	3807515_1bl_6239,ttttagggggggtgggccgcctcctcatttattgaccaatcaaattaactTtctttgtaaaaccttataactcgtttgtacgtgtagcattactccaccat
3831911_1bl_5888	chr1B	595.442	C/T	3831911_1bl_5888,ataagatggaactactgttggggccacatggggatagggcacatggcgcgCgatggacgcggtttaagcaaccgaagaatcaaccggttgattctaatcat
3911130_1bl_5134	chr1B	595.543	G/A	3911130_1bl_5134,actctgcaaaacaaattccacataccatcgtagagagtataacattccacGagtctaatctgctgacagcttctccatagcgtgacatcacgctgtggccc
3807255_1bl_2662	chr1B	593.921	C/T	3807255_1bl_2662,ttcacacgcatcagccaggacacaaacgatgggctgctgctaagccagacCttttcctttttctctagctttttcccttaagcacccgcctcttctgcagg
3881986_1bl_8946	chr1B	594.064	T/C	3881986_1bl_8946,cgtgtggtctccgcanccgactccgaccaaagggaatcgaggatggtctgTtgctccgcctgcagatccctgtcgccagcggcccccacatcctcctcctc
IWB25615	chr1D	439.029	T/G	IWB25615,ACGATGGACGCAGCAGGCAGAGATGCCAACCCGCTGGCCGGCTACCGGAT[A/C]GGCAAAACCCTCGGCATCGGGTCCTTTGGTAAGGTGAAGATCGCCGAGCA
10914626_5bl_2001	chr5B	295.816	G/A	10914626_5bl_2001,tttagaggcaggcggcggcaaccgcgatggaagctcgcggaattaccacgGcggcggcggtttgaagaagcgagaaaaacccaatggcctggcgattcaac
3836057_1bl_238	chr1B	595.292	T/C	3836057_1bl_238,cctgctgcagctccagacttcaatctggagcagatcgcgccatccgaagaTgggtggatggatcctgccacggaggccgcacactcagcggcgtcggagcc
IWA579	chr1B	595.181	T/C	IWA579,TCAGTTATGATTTCTCGTGGATGTGCTCGAGACTGTCAAATATCATAAAGTAAGAAAATC[T/C]AAGGATTTCGGCTTCAGTTATAGCAAGATGAATTTCAAACCAAAATTACCTGAAGACCAA
IWB12504	chr1B	593.924	T/C	IWB12504,GGGATCTCCATCTTTATCTGTTCAACTCAACGGAGGTCTCGAGTTCTGAG[A/G]CCGCCTGTTGCCCGCCTGTACATATAGATAGTAAGTACGATAGTATACGA
3831911_1bl_5679	chr1B	595.442	C/T	3831911_1bl_5679,agatcaggagggaggcgcttgcagcagcgacggtgctgcagtgcattttgCagcggcggtacacaagatgcggttgcctgagcaagctcttcgcatcggcc
3852972_1bl_4577	chr1B	605.927	G/A	3852972_1bl_4577,gcctatatccagtaaagaaaaatgttaacggcggttagctcgtactactgGgggcgggagtaaaggtaaaaaatgggtgatgccatattgctatagatctg
427152_1bl_2912	chr1B	605.932	T/G	427152_1bl_2912,gctgtactgaaacataagctaacagcatctgaaaatagcctccataacaaTaaatacaagatagtgagcaacctcttgagcaacatcattgcaccaatgtt
3917749_1bl_6879	chr1B	603.09	C/T	3917749_1bl_6879,actccaactcggctgcagagttgtaatccggtccaaaaggtatgacgcgaCgaggagttttgttgggaagatatgtgaccggcttgtcacatcatcaagga
3910906_1bl_1048	chr1B	603.425	A/T	3910906_1bl_1048,gagctacccaaaacgcaagctactgcccgaatttgacgatgaggctgcagAacccattccgccaaagaacaatacggccattcggccggaccaaccacttc
IWB54358	chr1D	443.825	A/G	IWB54358,TTTCAGTAACAGTGGGTAGTTACTTGCGTGTGTTCAGGTGTACATATTTT[A/G]CAGTTTGGGAGTGTGGCTGATGCTATCAGGAGTAATAAAAGAATGTAAAT
3794158_1bl_2805	chr1B	603.216	A/C	3794158_1bl_2805,gcttctgaaggccgaacaagatctcagcctcatttggcaggttctctacaAtgactgggcttttgtcataacttctactacaatgcactgcactttttcta
3915317_1bl_2568	chr1B	603.749	G/C	3915317_1bl_2568,tgtgccgttctggtgagcttgagtcggttgtactcctatgcttttctgctGttggtatgtaagtatatgcagtagtagcatttatttattctgcttattat
3871067_1bl_873	chr1B	605.458	A/C	3871067_1bl_873,aaagagcagacacactaccttgtgaaatggaggaagtgatcaagatttcaAagagggagtattgtttagtaggggtgcacatcggacttttcaaacagttc
3909752_1bl_3546	chr1B	605.008	A/C	3909752_1bl_3546,aatcttcccttataaaatggaccacaggggcacaggctgcagtgagcgagAcgacgacgtcactccatcctagtcgaaccacaccacactgccgccgcgtc
IWB30244	chr1B	603.302	T/C	IWB30244,CCCCCAGCAATGACCAGGTGGTGCCTTTTCTGATGGCCACTGGCTTCTGC[A/G]CATAGTACAGCTTGCGATGCTCCTGGCGCGTCGATGAGCTTGCCTAGGGT
IWB30243	chr1A	539.763	A/G	IWB30243,tggggcctctggggaataatttcggaacacgtcaacgatatcgacttcga[T/C]TACATGGAGTATGCGCGGCAGAGGCTTGCGCAATACTGGCTGAAGAAACC
3845925_1bl_5708	chr1B	603.511	G/C	3845925_1bl_5708,gccgaccggaacagccctcagcagcaaactgagcctgcacctccacccgaGggcggcggagcccagcacgctccggcggtggtacaggcgtgctcgctact
IWB50693	chr1A	543.96	A/G	IWB50693,TTACATCCCCAGTCAGGGAGCGCTCTGCCAAGGGAAACAACGACAACAAC[A/G]cggtgcctccgacctctctcgatgacaaagaagggctcgtcgtcagggag
1565456_1bl_291	chr1B	615.798	G/A	1565456_1bl_291,catgaaggccctgctcgacaagctcgtgctgctcaagctaggctgcaccgGccccaagtgagcaccccacccatcctcttcacttctcccaatcacttgat
IWB10422	chr1D	453.208	T/C	IWB10422,CGAGGCGGCGATATCCTCTCCCTCTGCTCTCCTGCCAGGCTGCCACGGCT[T/C]ATCGCGGTTGCTGCTGTACCCAGGTCATCTGCCGCCGCACGCACTCGCGG
IWA5186	chr1B	623.73	A/G	IWA5186,AAGGTCTTCACTGCCTCCCCTTGACGCTAGCTAATGAATACTTTTCATTGGATCCTAGTCAGCAGCAATTCCCAAACCAGGAGAAACTTGATGATCCCAA[A/G]CTGTATCACTATGCCTTGTTCTCAGATAATATATTGGCAACAGCAGTTGTTGTTAATTCGACAGTGTTAAATGCCAAGCATCCTTCTCGTCATGTTTTCC
IWB26166	chr1B	623.833	T/C	IWB26166,CGGCACTTCCAGTCGCTCCCGATCTCCAGCCACCAGGTTTTGTGAACCTC[T/C]AGGCGGAGGCCGCATGGCTTCACGCATGGCCCGCCCTGGATGGTGAACTT
IWB3260	chr1D	453.239	A/G	IWB3260,AAAATAAACATCCAGTAGAAGCAGAGCAAGAGCAGAGCCTAGCTAGCACA[A/G]CCACCCTCCTGTTGAGGCGCCCTATCTAGCTCAGGATGGACAAGGTGAAG
3874762_1bl_13407	chr1B	624.829	G/A	3874762_1bl_13407,acgagggtctgcgggcgcgcggtgaccgtcacgcgtggcgtgcgggaccaGgaggtacgaggcctgacatacgggcatgtggacgttatcaacttcgctca
3922607_1bl_22064	chr1B	623.842	G/A	3922607_1bl_22064,ttgggtggtcttagcatcaaaaacctgaaattctaggcactggctctccgGgtccgacgggagtggttgaggcgcacagacatggacagaccatggcaagg
3865749_1bl_7947	chr7A	397.827	C/T	3865749_1bl_7947,gaaagataaacattaggactagttcgactaccctcatacatggaactaagCatcatgacatgaacgactacatccgtacatcaacctcatgacgatggtgg
IWB56525	chr1D	459.838	A/G	IWB56525,TACGATGCATCAGTCATATGGGGCCTTATCAGCCCACGCAGAATATTCGG[T/C]GATTTGGGAACTTACTCTGCTGTGAACTGGTTCTTTTGGGCGGTGCCATT
IWB27691	chr1B	631.818	T/C	IWB27691,TGTCCTTACGACCATTTATTCTACGATGCATCAGTCATATGGGGCCTTAT[T/C]AGCCCACGCAGAATATTCGGTGATTTGGGAACTTACTCTGCTGTGAACTG
IWB2871	chr1B	632	T/C	IWB2871,TTCTATCAGGTAAGGCGGCAACCAGATCACTACGGGTCGCAAGTTCCTCC[T/C]ttgtgagccctttgaccttcttgagcgcgaggcgctgcagcttgggcagg
IWB10068	chr1B	632.01	T/G	IWB10068,TCAGCGCTGAGCTTCTTGAATCTCGGAGTGAACCCCGCCACCGCATCGTC[T/G]TCCGGGCAGAAAATGGTGAGCCCCGCATTGCGGGCCCTCTTCTCACCGAA
3819663_1bl_1748	chr1B	632.864	A/G	3819663_1bl_1748,cggcttcggcttgggcgtgtggcagctagcaaccgagggacctgcaaacaAaaggccagagacgtgggttttccctcgaaagagatgcataacggaaaagg
IWB20687	chr1B	632.421	T/G	IWB20687,GGAGCATCGAGTGGAAGGAATACTTCACCAACGTGCACATCCCGGGGTTC[A/C]TGAAGCACGTCATGAAAGGGAGGGGCACTTCCTCCATTGTTGGAAATAAC
IWA2064	chr1B	631.718	A/G	IWA2064,ATGATAGGAGAAGTTGTAACGTCGCCAAATTCCCAACCGCGAGAATGATTGGCCTATGCTGGCCGTTGAACAAGAGAGCTCTCGAGGAAGCTCATAGAGC[T/C]GTGGAGACAGCGGATAGATACATCAAGGGAAGAGTTCCCTCATCCGTTCAATTCGAGGTTCTGGGGCCCTGTCCTCGATGCCATATTGGAAAGTAGGTAG
IWB13447	chr1D	459.817	A/C	IWB13447,tggcatgacaggccagccagcagattatcagacgtacccgccgttgaccc[T/G]GATGACCTGCCCGTTGACCCACTCGGCGGCGTCAGTGCAGAGGAAGCCGA
3821998_1bl_7687	chr1B	632.421	A/G	3821998_1bl_7687,ggctgcaggtcgatcggcattggagaaaccatgtacgtatgcacattctcAatggcctagagaaactaataatggaggcctaatgcatggatgcaggtttg
3836516_1bl_808	chr1B	632.156	A/G	3836516_1bl_808,gaaggagttatcaataggggatgccattgtgaattcagattggcattttgAcaaacttgacgagctcaaatggtgggacctgagagagttggaagttatcg
IWB13458	chr1D	460.144	T/C	IWB13458,CTGTCACCGAGATGGTCGTCGACCACGACCGCCTGGCTGTCTACATCATC[A/G]ACGACGTGATGATTCCGAGAGAGCCAGAGATTGGATTCCCAGCCTTGCTT
IWB57827	chr1B	631.833	T/C	IWB57827,CTCCTCATAAGCTTTGTGTGTACATCCATCTTTCTATCCTGGAAAGCTGA[T/C]ttgcttaactgccaaatttcacttccatggaaaaggataacatggacaat
IWB66919	chr1A	551.982	T/C	IWB66919,GCAAGTGATTCAACAGCATGAACGCAGGAAATGATGTGATGTAATTGTTT[T/C]ggatcatcaggcgagctacgacatgggtaaatgaatttaagtgtggtgtt
IWB58214	chr1B	633.333	T/C	IWB58214,GCTGAGGATAAGGTGGAGTCCATGGAGAATTTGCTGAGCCACTGCAGGGA[T/C]GTTGCTGACCAGGTTAACGAGCTTGGGGCCTCCGTGTATGCACAAGACCC
IWB41895	chr1A	553.706	T/C	IWB41895,cggatagctcagtgcatcaacagttcacacttccaggttgctgaaagagc[A/G]CTCTTCATGTGGAACAATGACCACATCATCAGCCTGGTGGCACAAAACCG
IWB41896	chr1B	636.264	A/G	IWB41896,AACCTGACCGCCAACGTGATGAAGATGTTCTCCGAGATGGACGAGGAACT[A/G]TTCTCGGCGTGCCTAACCAAGTGCAAGGAGGATGAGGAAAACCAGGCGTC
3835730_1bl_11271	chr1B	636.12	C/T	3835730_1bl_11271,acttgttagagactcatgcagtaacgccagttcatatgctgcatcgagatCtgatggttgctgcagtgccaccagtactctgacagatggattcaatccat
3899711_1bl_3085	chr1B	636.326	C/T	3899711_1bl_3085,gtgtcgggtctggcattttggcatgatcgcttccttatccacatatgttaCgcctgccatgccgggtcacaccacatgtcaaccagggcctcccaacaatc
3880036_1bl_5434	chr1B	636.683	G/A	3880036_1bl_5434,cacgcgacgcgaaaacagcaaactaatcgctcgagcacatgatgcaccccGctgcctgttgacggacgcgagtggccgccgcacgaacgaaccgccgctga
3838872_1bl_4631	chr1B	636.754	T/C	3838872_1bl_4631,cgagatgcagagtgcacggttaattggcagatcctctgcttgtgaaccatTcagaatcattcagaatcggaggagagtcacaatgaactgctgcgtacctt
3872322_1bl_4640	chr1B	634.501	C/G	3872322_1bl_4640,gatcgatttcgcctggatctaacggaacaagcgcggcgattccattgcacCtgcaatgtttggactgtgtctaggttttctcgaccgaaacggcggttgtt
3889641_1bl_1976	chr1B	636.47	A/C	3889641_1bl_1976,gatctgatgttgttcacgcgagacagggagactgcagaaaacatatttgcAaacacaatccagatcgcatgtgatgattcaagcgatgccacttgaacgag
5243616_2bs_3236	chr7B	720.225	T/G	5243616_2bs_3236,tctctcaaacagtaaagcatgcaggacatgggacctgatgtaacgtatacTtttcgagattatttgtacacaaagctatgaggcttgatataactcagtct
IWB23869	chr1A	553.707	T/C	IWB23869,GGGCATAGTTACAACGTACAGAAGAAAAGCAAAACGACGAGCCCTGGAGT[T/C]GATCATCACTTGGGCGCGCTTCACCGAACAGGGGAAGAACACCATTGGTA
3873793_1bl_3057	chr1B	637.327	A/G	3873793_1bl_3057,actcccgctgtgactgtgatagggaataaaggggagaaaagggaggcaccAcaagaggcagccaccgccctaggtgtcgacctatgagagacacaattgat
IWB73429	chr1B	637.349	A/G	IWB73429,TAAGCTCGACAAACAAATTAGTGTAGATCCCTGTTTTCTGGGTAATTGGT[A/G]tcattttgtgagtcattagtctttcagagttagtgtgatgtagagtactg
IWB74754	chr1B	637.622	T/G	IWB74754,TACAGGTCGCCATGTGGAGGCTGCAGAAATCCTTGGAGGAGAGGAGTGCA[T/G]CCCAAGAGCGACAAACGGCCCGGAAGCGGAGAACGGATTTGACAGGGAGA
IWB74755	chr1B	637.623	A/G	IWB74755,GGACCAGGGGCGTACGTGCTCTCTTGATCCCCAGAACGGTGGTGAACGGA[T/C]GGATCCGAAGGTCTCCTCTGCGACAGAAAACAATATGATGGCAGCTCTTG
IWB52607	chr1D	462.489	T/C	IWB52607,ACCGAAAGAATGCCCTCTAGAACCTGACAGCTAGGATCATAGGTGTAAAC[T/C]TTTTTATGAAACTTTTCATAAACCCAGTGCTTGCTAGTAGCAATGACAAT
IWB21546	chr1B	637.826	A/G	IWB21546,ACAAACCTCGCCAAGAGGCTGGAGCTGTACCGGAGCGCCCAAGCAGAGAT[T/C]GACGCGGTTGCATGGTCAAAATAATTTTTTGTCGACTTATCGTGCCCTAG
IWB52606	chr1D	462.488	T/C	IWB52606,GTGGGTGAGACCACCAGTAGCTTTGGTGCTGGTGGCAGCACCTTACAGGT[T/C]GCCATGTGGAGGCTGCAGAAATCCTTGGAGGAGAGGAGTGCAGCCCAAGA
IWB2019	chr1B	637.498	A/G	IWB2019,ccatgggtctttaacaggacttacatgtggcctgtttatgaaaaattcag[T/C]GGAGGTCCCCTGTCCTGATAGTGCAGCTGGGCTGTACATCCGGACTCGTG
IWB36750	chr1A	554.528	A/G	IWB36750,GACCCCGCGGTCATGGAGCGGAGGACAAACCTCGCCAAGAGGCTGGAGCT[A/G]TACCGGAGCGCCCAAGCAGAGATCGACGCAGTTGCATGGTCAAAATAWTT
3863946_1bl_1046	chr1B	638.06	C/T	3863946_1bl_1046,ctaatgacactaaactgcagtatgttgaggacctgatgaggccattcattCcagcacgagatggtacgctggccaaaccgaagactggcgctcaggtaaat
IWB22011	chr1B	640.556	T/C	IWB22011,AGGCCATCCTACATCTACGCGAGCTCTCGCGACGACCTCTTCAGCCTCGC[A/G]TGGGACATCGTCATACCTTGTGGGGTGGTCCTGCTGGCCACGCTCCTCTT
IWB43818	chr1D	464.145	T/C	IWB43818,TGTACTGCTACTGCAATTCGTGACTCAAACCTTCTCAGCTTATTTGAGGA[T/C]GAGATAAAAGATAGAAAAGATATGCTTAAAACCCTGAGTGCACTAGAGGT
3817755_1bl_1573	chr1B	639.116	G/A	3817755_1bl_1573,gcagtatggccgtgtgagcgctctggaaatgtcgaagctagtctaggactGgctctccaaggtcaatgaaggcatctcgactcagtgagatcaacgaatta
IWB73882	chr1B	640.559	A/G	IWB73882,GACGGTGACATCAATCATAAGAGTCTCTCTCACAGGTGATGACGGTGCTG[A/G]cgatgatacttgtccctaaacatacggacggacggacggacggattatgt
IWB66198	chr1A	556.302	T/G	IWB66198,aaaagatatgctcaagaccctgagtgcactagaggtcctctatgagcttg[A/C]GGAGCACCCTCACAGCAATATGTTCTTGTTAAAGACCAGTTTGCTTCAAC
IWB66186	chr1A	556.302	T/C	IWB66186,taaagaccagtttgcttcaacacataactgatgtgataaacgatccctca[A/G]CTGATTCTATTGTACGGTCAAGGGCATCATTGATCAGTGGGAGGCTTCTT
IWB66189	chr1B	640.158	T/G	IWB66189,ctggatgatcatcaagcagaagagtgcctgaagcgcttagtctacagcgc[A/C]GCATCAAACAGTCCAAAATTAACTCCTTCAGCTCTTCTTCTATCAATTCT
IWB51317	chr1B	641.199	T/C	IWB51317,CCGGTACAATTTGGACTAGTATATCACATAGTTGTTGCTTACAACACAAC[T/C]TTTTCAAGTAACTTATTAACAATATTTCAGTGACTGATACACACAAATGC
3879677_1bl_461	chr1B	642.752	T/C	3879677_1bl_461,ctctaacatagcagcaactactgcagagggacatcgatgtctagcgcccgTcgatgcctcatccgatggcacgaagttggaacgtggcaagcaccccagca
3850516_1bl_4284	chr1B	644.277	A/G	3850516_1bl_4284,cgaatgctagcggtttgagggtccacgagatgccctaattaacgtatatcAcgtgtagtgctaaaaaaggacgggttgacatcgtattggagaaaggcatg
3798715_1bl_4582	chr1B	644.337	G/A	3798715_1bl_4582,agtgggaaaaagctaagagcatctccaacaggaccgcaaccacgcggcacGctaagagcaactctagcagaccccgcatcccgccggcccgcaaaacgcgt
3871161_1bl_444	chr1B	644.385	C/A	3871161_1bl_444,atggctttagatccagtgcagatcatgacatccgaggatgggaggatggaCcccgccatggaagccacacactcaacggcgatagagccgaacacatattt
3892862_1bl_4797	chr1B	644.307	C/T	3892862_1bl_4797,gacgggagttttattgatcgattcgatctataacgatcggctgatatacgCatacatatacctaggaaaaaattccaaaaatcaaggtagggcgagcgccc
3914970_1bl_3276	chr1B	644.239	G/A	3914970_1bl_3276,ctaccttgtttgttgtcttgataggcaaagtttgagatgaacacggactcGgagaccatcaagaccgcgtgcaaagatattctgcagaaaaaatcaaagca
3871161_1bl_721	chr1B	644.384	A/G	3871161_1bl_721,ccttgtcaggagactcttggccgaactatgtccggcttgagtgggaagcgAccgacgatggaattcgttacccacccaccacccacttaatatccactatc
3914970_1bl_3030	chr1B	644.239	C/A	3914970_1bl_3030,aggtgcctatccaaattgccgaagggatgaagcgtccagagaagcctctgCagtcagcaaagcttgcttctgagtgtggactcgttgcaagaaaccatctt
3887841_1bl_2437	chr1B	643.259	G/C	3887841_1bl_2437,taaagtcgggggaaggagagaaacaatggggaagggagcataacatggatGtggggcaggagaggccgtggtcggagcggcattgcgtgggcatattggtt
IWB26319	chr1B	643.258	A/G	IWB26319,gttagagtgagtggagcacaacgagctagacgtcgttccagcgagattga[T/C]AGGGTCGGCAATTTTGATTTGCAAGTTTCGGCCGAGGGGCTTTATGGCAC
3898747_1bl_3000	chr2A	699.806	G/A	3898747_1bl_3000,tcggcattgttgatccgtctgatttctttcgagtttcttctttttctagcGgccgccgcatctcaccttgcttgtgcaccgctgcaggtcacccgccgctt
IWB20313	chr1B	642.771	A/C	IWB20313,GCAAATCGGGCGCTTTGTAGTGTTCAAGTTGGTAAACAAGAAGGACAACT[A/C]CCTTGTTGATGTGCTCTATGTGRGCATGCAACCTGCAGGAAAGGGCAACA
3915619_1bl_1936	chr1B	642.782	G/C	3915619_1bl_1936,agcggtgaggccgtgcacggcgacgtaggcagccgagaagaatccccttcGggcagtaacccggcagtaacgtgcgccggcaccctcatccctttgcctcg
3915925_1bl_5778	chr2B	465.797	T/A	3915925_1bl_5778,aacgagagagggagatatattagtgaggagatggagagagaaggagttggTgggcgctgagcgcagcttaccggcagaggaggtcggcggcggcttgctgt
3882471_1bl_5822	chr1B	644.526	C/T	3882471_1bl_5822,gtttcgaaagtttgaaaggagcctgcagaaacctgtaaaagcctgtacgtCtagcatttttgatctattcacggcacgccgggcagaagcatgcggcgaac
3915581_1bl_881	chr1B	645.018	A/T	3915581_1bl_881,gatagtacttttagctggttgttgcattgcatgcacttggttattttattActaacctactaatggatgtgagtgtagatggctccggtgttgtatccgtg
IWB44710	chr1B	673.959	A/G	IWB44710,CAGAGTGGAAGTCCTGGAGATGATGAAAGGCCATCTACTTGCTGTCATGT[T/C]TGCAGAAGTCGTATTTATCATCCAATATTACCGTGGATAAACGGCGATGG
IWB35131	chr1B	674.08	T/G	IWB35131,TGCCTACAATGCTTGCCACTTGGATGTATCTGGATTGGGATGGATGGAAAGAGATGTTTGCTGATATCCTTGGAGTTAGTAGCTAGTTATCTTATCTAGC[A/C]CAATGTTTGAAGCCTATATAGTGTGTGTTATCAGAGTAAAATTCTTATCGGTACACTTTTTATTGGCTGAATGTGAAGGAACTGCACTTCTTGTAGCCTG
IWB965	chr1D	484.266	T/G	IWB965,CCAAGGAGAKSGKGGTGATCAGGCAGAGGTTCGGGCTGGACGGCAGGGGG[A/C]GGCGCACGCTGAGCGAGATCGCCGGCAACCTGAGGATCTCGAGGGAGATG
IWA724	chr1B	674.498	A/G	IWA724,ATGCATTATATATTCTTCTAATAAACCAGAGACCATTTTCTTTTCTTGCGTGCTATGAATTACATCAGCGCGAGGTCTAAATCAAATATTATATATACAA[T/C]CTCACTCGTATATACAGACTTATATACATGTCCGAAATACGGAATCAATGATGAGTCTATGCCATCTTGCAATGTAAGTATATGCAGCATAATCAAATTA
IWB73714	chr1B	675.56	A/C	IWB73714,TGTCCACGAGTAGACCAACGGCAACACACACGCCCCCGTACGTATCTTTC[A/C]tttcctgtgtaaacatcttgagctgctccttgtgcctcggtcggcctcag
IWB8817	chr1B	675.32	T/G	IWB8817,TCCATTATGGAACTGCTAGGAAGGCCTTATTGTGAGCTCGGTGAGCAATT[T/G]ATGTTGGTTGCGCTTCATCCAGAATGTAACCTGATTTTCCTTGTTGGTTG
IWB9613	chr1A	582.223	A/G	IWB9613,ACGCAGAGTATTTCAAGTCTTATAGACATCATATGGTTCTCTTCTTACTT[T/C]CACTGGCGCAAATGGTTAAAAGATCTTGCTGGAATGAATCTAAAGCTTGA
IWB18787	chr4D	291.767	A/G	IWB18787,AACTACAATGCATTAAACAGTGCAAGCACTTACCACGGTCATTTTCACTAAAAAATTACCACGGTCATTCCTAGACCTGCGATTGTTATGCTAAACGGATGATCTAATAGACAAAAATATTGTC[T/C]GCTTTGAACAGCAACTTGACAGATACCCAAACTTTGGGGGTAGGTAGTAGAAATAG
IWB73713	chr1B	675.56	A/G	IWB73713,TGCGGTACAAATAGACAAATCGAAAAACGCACATCTCCAATCACGCAAAC[A/G]CTCCCTAAGCATACTTAAACAAGATTTAGTAATCCAAAGGCTCCTACGCA
IWB11800	chr1B	677.256	T/C	IWB11800,GAGGTAAGTTGCGCCCACTCACAGACCCCTGGTAAAATTTTGTGCAGGTC[A/G]GTATTATCACCCAGATATCTTGTGCCTGTGATCCTTGGTTCTATTGTCAG
IWB6488	chr1A	582.866	A/G	IWB6488,CCAAACATTTCAAGACCATCGATAGATCCTGGAGGCTGCAGTGTAGGAAC[A/G]TTAGGCCTTCCCATACTGAGTTGCCTCCGTATTTCCATGTTCAGCCTCTC
IWB8044	chr1B	678.048	T/C	IWB8044,tcccacaggaaaatgtggaggctgtcaacactgaggagacccctgctgtg[A/G]CAGAGGATGAGAAGAAGCCCGAGGATGCGCCGCAGCCCGAGGCTGAGAAG
IWB258	chr1B	676.776	A/C	IWB258,CAGAGCTACAATTGTTTGGGCAACTTGGGATCTCATTGCATTAGTTGAAA[A/C]TGGAAGACATGATGGCACTCCTACACATTCAGTGTGCTTTGTTTGGAACA
3884494_1bl_4310	chr1B	676.51	C/A	3884494_1bl_4310,ctgtgctgcaggtggacactttgggtccggcccatttgagttggcgtacaCcttgcagcaagcaggtatagacgctctcttttttttttttttgagacaag
IWB9772	chr1B	676.201	T/C	IWB9772,AGCAAAGGATCTGGCGAGCGCGAGGCGCCAAGCCCAGACGGCGGCGAGGT[A/G]AACGGAAAATTCCGGCGCAACGCATACGGCGAAGACGAGCAGCAGCAGCA
3918729_1bl_10382	chr1B	676.306	C/T	3918729_1bl_10382,tagctgcccagattgaattgtaaccaaggccatatgatttatgtgttctgCagctactatatcttttgtgttttgaaccaacaaacaacccagacccctag
IWB1341	chr1A	584.674	A/C	IWB1341,AAGTACCTGGTCGGCAGGTTTGGCGTCATCCCTTCGAGCCCCAGGACGCC[T/G]ATGAAAGCGGTATAATGTAGCTGTTTCCCCCTAAAGCAACTTTATTACGT
3824869_1bl_7542	chr1B	679.46	G/A	3824869_1bl_7542,tgtagtcacttgttgaaatctttagaaagacaagtatttaggaacggaggGagtagttctcacgtaacagagatattccacatactaacaaaccacgtgcg
3824404_1bl_8728	chr1B	679.686	A/T	3824404_1bl_8728,ttcataacgactgctactgacatgaatcaacacttgcccctgacggtaacAcaataactgtcgaatctgaacatatgttcagggaagccaggaaagaaaac
3797079_1bl_4750	chr1B	682.271	A/G	3797079_1bl_4750,actaacggtcaagtcgaacgggccaatggtctcattatgagcggcatcaaAcccagactagtgcgatccctcaatgaatctaacacgcactgggtagagga
IWB27547	chr1B	680.863	A/G	IWB27547,TGCAGAGATTGAGGACCGGCCTGCTGCCGCTGAGGAGCCTGAGCCCAAGG[T/C]AGGCAAGGCAGAGGATACTGTGCCTGCTGCTGCTGCTGCTGCTGCCACCA
IWB65272	chr4B	22.0881	T/C	IWB65272,TCCCTAGCTCATTTGTTCCTTGCATTGCCGGCTCAACGCCGCCCCTCGCC[A/G]TGGCTCCTGCGTCTCCTCTCAGCCCGGAGTAGGAATTGAGTGGTCCTCAC
IWB68093	chr1B	680.163	T/C	IWB68093,TGTTATCTACACAAAGAAGCTAGACGGACGGAGCGCCCTTCAGACGACCG[A/G]TAACAATGGTCAATGCTTCTTCCTAGACGACGAAGTCCCGCGGCATCGTT
IWB9931	chr1B	678.485	T/C	IWB9931,CTGTGGGAAGACAACATATCTCAGTTGGAAGAACTGAAAGATATGTTAAA[A/G]GCTGCGGAGAGCAGTAAGGTGGTTATTATAGCAACCACACGAAGTGAAGG
IWB25940	chr1B	678.257	A/G	IWB25940,ACAACTTAAAAATATATTGAGAATTACACCACCTCCGCTCAACATGTGGC[A/G]CGCTAACAGATACGAGTATATGCCTCTGCAAGCCTATTTGTGCGCCGGCG
IWB25583	chr1B	679.3	T/C	IWB25583,CCTCCGAAATTGAGCTCAAGTAACACGCGGCAGCAATCCAGTTCCACAAG[T/C]AGGAAAGGAACAGCCAATGGTTCCTCCATCAACGGAAGCGGGAAAAAAGG
IWB435	chr1A	584.674	A/G	IWB435,TCCGAAAATGGGGCAGTACCATTGCTCGTCCACGCCGACTGATCTTGTGG[T/C]GCGTGTCATCTGGACATCATCAGCCATTCTCACCTGCATTTGTGTCTCAT
IWB7523	chr1B	678.257	A/G	IWB7523,GCACACGGCTTCAGAAACGTAATAAAGTTGCTTTAGGGGGAAACAGCTAC[A/G]TTATACCGCTTTCATCGGCGTCCTGGGGCTCGAAGGGATGACGCCAAACC
IWA4525	chr1B	681.253	A/G	IWA4525,ATCCCTGTCCTTGCCGGTGGGAGGGCTCCTGCTTCATTTTTAAGTGTGTTTTTAGTCTGTTTAGGGTTTGTGTCCTGCTCAAATCGACGAGACAGTGGTG[A/G]CTTTCTGAAGTTGGAATAAGGTTCTCCCCGCATAGCCCCCGTTCTTACGGTGCAACTAGTGCCATGGGAGGGCGGGTCGATATTTATCTCCTGCGGATCT
IWB72461	chr1A	593.287	T/G	IWB72461,cttcaggtttgcttggctcaacaacgccaacacaccacaaaccagatgaa[A/C]GTTCCCAGCGACACCGACGCACTACCGACTTACTTGTTCATTCTACCAGC
4279627_6bl_5324	chr6B	565.056	A/G	4279627_6bl_5324,ctaggagctcccggggaggtcctatgtgccgcattttgcggcgaatagccAgcctgacgaacacaggaactgtctgactgggccggcccactataaggacc
3832066_1bl_5399	chr1B	680.932	T/C	3832066_1bl_5399,tttttttgtacaggtagatccatgttctttggatgcaaaggtcataaatcTgttcatggatatatccacaaagtctatagatccatccaattatgcctccc
IWB9079	chr1B	679.653	T/C	IWB9079,AAGGGAGCTGGCAAAAGCATCACGTTCTGGCTTTTCCCAACCATTCACTC[T/C]AATCTTCAGGTTCCTTAGATTGGTCAGCTCTCCGAGACCCATAATAACCT
IWA4693	chr1B	686.844	T/G	IWA4693,AGTAGCAGTAGCATATATACACCACCATCCATCTATATATTTATCCACCACAGAGAGCAGAGAGAAGAAGAGGAAGACTACTACTGATGTGTATAGGGAG[T/G]GAGTGAGTGAGTCGGATCCATCAGTAGCTTATAATTAATTATATTGTTCGYGTTAGAAAGCTAATCATATCCATCTCCCTTATGGAGTAAGTAGAAGAAA
IWB4789	chr1B	686.844	T/G	IWB4789,AAGAAAATCCCTCTGGTTTATGCTGGAAGAAGAGCTGGAGATGCCGAGAC[T/G]GTGTACGCTGCCACCGCCAAAGCTGAGAAGGAGCTCAAGTGGAAGGCCAA
IWB6930	chr1B	688.283	T/G	IWB6930,tgcacctcctacagcctcgacatgccgatgaggagcactcgctaccttct[A/C]TGCAGCAGAAGAGCCCAGCTTCTCAGAAGAAGATTCAGTCGCACCTCCTA
1881608_1ds_7447	chr1D	0.387435	A/T	1881608_1ds_7447,tcattcacaagatgtcgtcgaaagatcatcattagactgtcataaaggaaAatcattgcagtaaaggtcaaggcaacaaaaagttcagagaggtgaatctg
1712725_1ds_2887	chr1D	0.397979	C/T	1712725_1ds_2887,tcattgcaatcatctgttaaatgaaagacacttcaacacaagtctaggagCtagaatcagaatgtacattgaactagatagaaactaaggcaacatacagt
IWA3125	chr1D	0.417712	T/C	IWA3125,GGGGAAGGTGTTCACGGATGCCAGGGTTTGCTCAACCCGACGCACATTCGGCGACGACCTTCTGAAGGAACAGTGATTGGTAATGCATGTATGCATGTGT[T/C]GGCTCAAGCAGCACCGCGATCAAAGCGATATGCTGACTTTAATATTGTTTGTATCGTGGTGTGTTAGCATTTTCCAGAGATTTCATCCATCTCGGTGGAA
1913609_1ds_13103	chr1D	5.24675	C/T	1913609_1ds_13103,atgtagtacaaatacatctttagaaaaaaatcctacatgattcaatcctaCaaatcaaacgaccaacataggaaaacttcctcaggattttaatccttcaa
IWB45439	chr1B	9.7154	T/C	IWB45439,gatgactagcttctggtcaatgtagtctacccagaaccgagcaatggcac[A/G]TTCGTAGGGGTCAGTGGGCAGGAGGGAGGGGCCTGTAGTGCCGTAGGCCT
IWB59230	chr1D	7.03965	A/G	IWB59230,CACTGAAGTTCAAGTCATATCCATAGGTACCACGCAAGGGAGAAATGGCC[A/G]GTGAAGACGAGCTGAAGCTGCTGGGTGCGTGGGCGAGCCCCTGGGTTTCC
IWB14030	chr1D	7.83407	T/C	IWB14030,GCCTGTTGGCGAAGATGGATGCCTGGAAACGTACGTATGCACTGTGAAAT[T/C]TTCAACTGTTAATTGTTACTGGGAACTGGATTAAACTGAACTTATGTGAT
IWB46706	chr1D	7.86967	T/C	IWB46706,GACAAAGAGGGCCCGTTGGAGTTGCGGAAATTGGCTTGGAAGTTCATAGC[A/G]AAGTGTCAAGGTTTGCCTATTGCTATTACATGCATTGGCCGCCTACTCTC
IWB30124	chr1D	7.87058	T/C	IWB30124,CTGGTACTTTGAAGGACTCCATACGTGGAGTCAAGGTGCCTAAGGGCATG[T/C]AGCACTTGGCAGGACTGCATGCTCTTCAGTCCGTCAAAGCCACTCCAGAG
IWB30125	chr1D	7.87071	T/G	IWB30125,CAGAGCTAAGAACATTCCATGTGTGCAACGTTCAGAGTGAACACTCTGCT[T/G]ACTTGAGCAATGCTATCACCAAAATGAGTCATCTTGTTCATCTCGAAATT
1361583_1ds_8793	chr6A	256.476	A/G	1361583_1ds_8793,accagtccggcatactctcagaggccgccgccgccgtctgttattgatccAtcttccgagcaggtactaacgcacagaccttgccaagcctgcagtcgacg
1062473_1ds_941	chr1D	8.07725	A/G	1062473_1ds_941,tggcagttgtaaatgactagtgaaagtgtgcttttagtccttgctaggtgAtttacgaatccagatgtattttttattattttctatattcgtagtactgc
IWB43001	chr1B	10.0753	A/G	IWB43001,TTGTGAGGCTTAATGTCAAAGTGGAGGATGCGCTGGTTGCACCCTTGATG[T/C]AAGTACTCCATACCTCGGGCGATGCCTAAAGCAATATCTAGGAGCTTCTC
IWB4763	chr1D	7.87758	T/C	IWB4763,CAATACATCAGCAGCAGCAGCAGCATCATGTGGATGTGCCGGTAGATCAA[T/C]CAGGAAGTTAGCATGCTCTGGGCGAGACACCATCCTTTTTCACCCAGTTC
IWA6487	chr1D	7.87488	A/G	IWA6487,CTTCTCCCGCCGGCCATCTCCAGCAGCAACATCCCGAAGCTGTACACATYGGACTTGCTGGATATGACGCCGAAGCTCCGGGATATCATCTCAGGAGCTA[T/C]GTAGCCGACGGTTCCCCGCATGGCGCTCAAAGGCACGAAACTGTCGCCCCTTGGGTACAGTTTGGCGAGTCCGAAATCGGCGACCTTCGGGACGAAATTG
IWA2449	chr1D	7.8748	T/C	IWA2449,AGAAGCGGGCGAGATATCTCCAGTTGCTGCCGACATGCACGAGCTAGAGAAGAAGTTGTGTGTTGTCGGACTATGGTGTATTCAGATGAGGTCTCGTGAT[T/C]GGCCAACTATGGGCGAGGTCATAGAGATTCTGGAGGCCGGGGCTGATGGCCTGCAGATGCCTTCAAGGCCATTTTTCTGCGACGAAGGGCACATCCATGT
IWA1773	chr1D	7.88035	A/G	IWA1773,ACCATACTCTGTCAACATTCAGGGACTACCATGCTCTGTCAACACTGTATTTCTATACTTTCAGTCCATATAATAGGTCTGGAGATGTATGAATAATCAC[T/C]GGTCACTACCATTGTAATAGTACTCTACTAGTTGTTTGCAAGACACGCAGATTCACAATTGGACTTGTATTTTAACAGCTACRMCCATATTTATCTTCG
IWA6486	chr1D	7.87483	A/G	IWA6486,CATGACGGGTAGTACGCCTGGCTTGAGGACCCCATGTTTGGATCAGCGTTCCTTCTCCCGCCGGCCATCTCCAGCAGCAACATCCCGAAGCTGTACACAT[T/C]GGACTTGCTGGATATGACGCCGAAGCTCCGGGATATCATCTCAGGAGCTAYGTAGCCGACGGTTCCCCGCATGGCGCTCAAAGGCACGAAACTGTCGCCC
IWB1063	chr1B	10.0808	A/G	IWB1063,TCTCAACTGCATCAATTATGATCCTTGTTTTCATGTACTTGTAGGCTAGG[A/G]ATATCCATACAGCCAGGGGTGCCAACAAGAACCTGCACAGTACTGCACAA
IWB35429	chr1D	7.94821	A/G	IWB35429,TTAATCGCTATGGTGTTAGCAAGTCAGACGTGCCATTGAAGAGAAAAGGCTCTTCTGGGGATGCTTCTGCTTCTGCTGTAAATGATGACAGCCAGGCAGT[T/C]GGTAGACCGTCAAAGAGAAGCAGAAAGCGGAGAGTGTCATTTAGAGATCAGGTTGGTGGAGAGCTTATTCAGGTGGTTGGGATTTCTGATGGTGCAGATG
IWB4762	chr1D	7.87755	T/C	IWB4762,AGGTCASGGTTCCTTTCTGCCTTGAATCCAGCAATACATCAGCAGCAGCA[A/G]CAGCATCATGTGGATGTGCCGGTAGATCAATCAGGAAGTTAGCATGCTCT
1878569_1ds_6834	chr1D	7.94926	C/A	1878569_1ds_6834,ctgatgatgaaccccacagggctgtactcaagttctgcaagaatcccctaCgaatggattacacaaagtcagtaccatcagacaaactatcaaccaaatta
IWB38211	chr1D	7.90243	T/C	IWB38211,GAGACTACCATACTCTGTCAGCATTCAAGGTTGTACTTTGTCTACATGTG[T/C]GATGCRACCATAGCAACCAGTGTGTTTCGATGCTTTCGGTCCATTAAGTC
IWA407	chr1D	7.94866	A/G	IWA407,TTGATTTTCTTAACTCAATAGACAACGGTTTGTGCCTGTAATGGAATATTGTGCTCCTAT[A/G]TGCTATTGACCTTTTAGACATGCTTCGTTCAGAATTTTCTGCCCAAGAAATGGCAGGATT
IWA6960	chr1D	8.18477	T/C	IWA6960,GAGCTACACTATCAATGCGTGTTGTCACAAGTACTCTACTCCTCTTCTGATTTTSAGCGAGTGCTCCAAATAGATYATTGAGAGCTTCCGGAGCCCAAAC[A/G]TCATCCAATATGATGAAATATTTCTTGTCCTGTAGGAAGGTCCTTAATTCATCTTGAAGGCCATTAATGTCCATGTTGTTGATGTTACCAGGTGTGTCGT
IWB38212	chr1D	7.90246	A/G	IWB38212,GGTTGTACTTTGTCTACATGTGTGATGCRACCATAGCAACCAGTGTGTTT[T/C]GATGCTTTCGGTCCATTAAGTCTGAAGATTTATGAATAATCACTGGTCTC
950909_1ds_46	chr1D	8.3951	G/A	950909_1ds_46,Taaattccgcagaaactataaggtgcagctgcagaagaatgattcgaaagggtctaccttgcaagcacattttccttgtactgaagtacttgaata
1885854_1ds_4819	chr1D	8.46402	C/T	1885854_1ds_4819,gcgcgcgtgtaccatgcgtgtatattgtatcccgttcgatcgacgcagcaCatctatgtactatatcttatgtgatcctccatgactgttggccggccgaa
IWA1788	chr1D	8.60581	A/G	IWA1788,CCAACTGTACGCAGATCATCCTGCTCTATCTCATCCCCACCACTGATATATAAWTTTTCTAGGTTGGCAAGTGAAAGCAGCCATTTGTTAATCCAACACA[T/C]GCGCCCACGGCGGAGATAGACCTCTCGGATACTATTGAGAGCAGGCAAGAACGGATGTCCTATGAAGCCATCCTTTTCTCTCAAATAAAATGTAACACAG
IWB44341	chr1A	11.6632	A/G	IWB44341,TTCTTGGCTGCACCCGACACCGACAGCCATACCTTCGGCCTCAGCGCTGG[T/C]GGCACCCCCTTCCTGATCAGCCTCCTCAATGTAACCGTATTTGTGAGCAC
IWB47908	chr1D	9.87496	T/C	IWB47908,GCTAAGCCTCTTCACATGTTTTTTACTGCGCATCATGCATCCATCTTGAG[T/C]GACCCCAGCCGTCTGGTTCTTTGGTCGAGCTCCGCCATGACCACCGTCTC
IWB47907	chr1D	9.8752	A/G	IWB47907,TACAGGTTTCAACCAGCGGCAGAACCTGATCCCACGGCATCGTGCACACG[T/C]ACAGAAACACACAAATATGAAGGTCCCAAAAACAAACCCACATTTGCAGT
IWA817	chr1D	9.87518	A/G	IWA817,TCAGGTTCTGCCGCTGGTTGAAACCTGTACGAATCCGATGCTTGTCGGCAGCGCTCATGGCATTTGCTTGATTTGTAGTCCCGATTTGTCGTGCGTGTGA[A/G]ATGGAGCTAAAAAAAATTCTTCTGTTTTTTACCAAAAAAAAGTA
1884715_1ds_1220	chr1D	10.369	A/T	1884715_1ds_1220,ctgcagtttagcttgtttgttcacatcgcagacctctgtaaaggaaacaaAcctcaactttttcttgtcttgcatatgcatatacttcttagttcttacta
IWB576	chr1D	10.2572	T/G	IWB576,ATGAAGATGATGGCAAGAACAGCCAAATTTATTCCATATGTACTACACTA[T/G]CTTGGAATCAATCAATAATAGGATGGATGAATTAACATTAACAGCTGCTC
IWB21104	chr1B	15.1682	T/C	IWB21104,GACATTCTTGAGTTACATAAGAAATTCCTTGAACTTTCTGGTGGGATTAA[T/C]cggatctttgaactcgaggagattttgcgtgtagctcaaaaggatacccc
IWB41724	chr1D	10.2624	T/C	IWB41724,TTGGGGGAAGTTGCTATGACCTTTGTAGAGTAGGAATCCTTGGACCTTAA[T/C]gaagcattgctctttgccctgttcataaaagccctttgaacagttagggc
1884715_1ds_1453	chr1D	10.3692	G/A	1884715_1ds_1453,cttgtttacataatgtgtgttcacatccaaaaatatcttctaaagctaccGtttattttctgttttctttcgtgaccatagtttcagtcaccttaatttac
IWB38400	chr1D	10.1804	T/C	IWB38400,CATCTTCACCTCCATGCCTCCTGTGGGCACCTTTGTGAAATTCAACTCTA[T/C]CGTCGCCTCAAGCGCTCTACGAAAGATGATAAAATCGAACATGGCCGCAC
IWB577	chr1D	10.2574	T/C	IWB577,ACACCTCCAAACTGAAACACCTCTCAATCCTAAGCATCCGGTTTACCGTC[A/G]TCACCTGCTCGTTCAGTTTGTTGCTAAATTCGGTATAACTAGACTACGAC
IWA6500	chr1D	10.1802	T/C	IWA6500,TAGGTTCAGTAATAGGTCGACGACCAAGAAACCGTCACCGACACCACCGCACCGTTGCTGAAATGGTATTCTCTCTCTTGGCTGCCATGAACTGCTGCCT[T/C]GAAAGGAATCGACAGCTTTCCCTCCATGAAGTCAACAAACAGTGTATCTTCAAACGGCACAGCCGCTATGAAGTATTGTGGATGTCTCCCAGCAGAGGCA
1884715_1ds_1224	chr1D	10.369	C/T	1884715_1ds_1224,agtttagcttgtttgttcacatcgcagacctctgtaaaggaaacaaacctCaactttttcttgtcttgcatatgcatatacttcttagttcttactagaga
IWB18376	chr1D	10.6686	T/C	IWB18376,AATACAGATAAGAGAAGGCCTTCACACGTCAAGTTATACTTCATCTCGGAGCACATCGAAGC[A/G]AAAGGGAAACTTGTCAGGTCTCCTGCGTAATGAGGTTGTTGGTCAGATGAGCGAAAGAAATGTTCCTATGGGAAAGGGATCACGAAGCAAGCATGCACGCTCTCTTTTGGAATTATCTGATGATA
IWB8671	chr1D	10.6668	T/G	IWB8671,ATCGTCCACATCAAGCAGAAATTAATTATCAGCTAAGTCAACATGCCTTC[A/C]ATTGCTATATCTGCCAAGAATATCTCGAGCAGCCCAGTGATGCCAAGAGT
IWB27847	chr1D	10.6609	A/G	IWB27847,TCTGCAGGGTGCTTCTGTCAGTTGAAGACGCTTGTCTTGAGGCGCATGCC[T/C]AATGTAAAGCAACTGGAGATTGAGGAGGGCGCCATTCCGTGCATTGGTGG
IWB8670	chr1D	10.6668	A/G	IWB8670,TCTCTATCGTCCACATCAAGCAGAAATTAATTATCAGCTAAGTCAACATG[T/C]CTTCCATTGCTATATCTGCCAAGAATATCTCGAGCAGCCCAGTGATGCCA
IWB35174	chr1D	10.6616	A/G	IWB35174,TTTTATCTGGATCCAACTACCTTACCGTTCTCGAGCTTCAAGACTCTGCAATCTGCCATGTGCCAGCATCCATCGGGAATCTGTTCAATCTCCGCTACAT[T/C]GGCTTGAGGCGCACCAGAGTTCAGTCATTGCCAGACACTATTGAAAAACTCTCAAACCTCGAGACGCTGGACGTCAAGCAAACAAAATAGAAAAACTACC
IWB22674	chr1A	12.1427	T/G	IWB22674,AAGATTGCGAAACTCAGGGTCATGAACTACAAGAAGCTCACCCGGAAGGA[T/G]AAGCAGCTCATGCCGCACCGGCTTATCGAGGTCAGCCCCAAGTGGGCTCG
IWB42815	chr1D	10.8457	T/G	IWB42815,CATCTGCACCAGTGCGCCGTGGACTTAAATCAAAGGTTCGTTCAGCACAA[A/C]CACCAGCAGCCTCATTATTTATGCGAAACATCACATTTCTTTCCAGACAG
1915633_1ds_1815	chr1D	11.4018	C/T	1915633_1ds_1815,gtcggcgtggcctgagcctccatgctcgtgtttgaggtccaaaactatgtCtgttacgctgtctaagttgtgggctttattaatttaaagccggacgctcc
IWB14343	chr1D	12.3151	T/C	IWB14343,TATCAAAATTACACTGGGATTCTGAGACAACATGACTGCCTGAACCGATT[T/C]CATACAATGCTGTTCTAGGGCTCTTCAATAATCTATAGAGTTCTGGTGAA
IWB15488	chr1D	18.2225	T/C	IWB15488,GTTTGAGAGCTGTTCGGGAGGCAACGTGGCGAAGATGATATGTCCTATAAGGTGTTCGTGATTCATCCTGATTGTGATTTGATTTTCCTTACTGACGAGGACGAGATGGCAGTGTCATATGATA[T/C]GGAGAATCAGAAAGTCAATGCTACATGCACTTTTTCTCAAGAA
1911116_1ds_1558	chr4B	19.6031	C/T	1911116_1ds_1558,ttaagccgggccggcggcttagaggcaagactctccaggcaaccctgcatCgaactagatcaattccggtcaagccgttggccatcaaggcccggatcttt
IWA1572	chr1D	27.896	T/C	IWA1572,CCTTCACTGCTGGAGCTAGAACTTTCACCTTCGACGACAACCCCTGCGACTACTTCCAGGCCGGCAAAGTGAAGGCAACGACGCTCTCACTCTCCGTGCT[T/C]GTGGCGATCGAGATGTTCAACTCGCTCAACGCTCTCTCYGAGGACACAAGCCTGCTGAGGATGCCTCCGTGGGTCAACCCGTGGCTGCTCCTGGCCATGT
IWB8432	chrUn	400.487	A/G	IWB8432,gttcgaccttgcgtgtgtatgtttattcttggatgatctgtttacctacc[T/C]GTTCCGATTGATAAATGTTGATATGTTGTTAGGGCGGGAGGTAGGGTTTA
IWB42165	chr1D	28.5048	A/G	IWB42165,CATAACACATGCTACGAACTATACATACATGCATAGATAAATAACTACTT[T/C]CGGCACCTAGAGCCAAACCAAAGCCACATTCATATGCTAGGACACGGCAT
IWA6675	chr1D	28.5046	T/C	IWA6675,AGATCGATCCACCAGGTGACGCGCCATGACAGAGACTCTCAGCTGCCCGTCGTCTTCGACAGACACAACACTTCGTGAGAGCTGTATTGAGCCATCAGCT[A/G]CAACAGGCAATTTGTCGTCTCCGAAACCAAGCAACTCGATTTTCTCCTCGTCTATGCTGGCGGTAGTGGCGGTAAATACACCTCTGAAACCTTGTGGCCA
IWB22792	chr1D	27.8977	T/C	IWB22792,AAGAAGACACTGCTGCGAAGGAAAGGTGGCCTTCTGTTCTCTAGGGCAGA[A/G]CCCAGGCACAAGCAAGAGATTGTGAGACTGTTAAAAGAAGACGGTGAAGT
IWB61141	chr1D	28.2031	T/C	IWB61141,GACCTGAGCTACTCATCATCACATGATTCCATTGTGCTGGCCAAGTCGCC[A/G]CTAACAGGGAACAACAGCCTAACAAGGTATTCCAGCCAAACATACGGCGA
IWB19917	chr1D	28.2028	A/G	IWB19917,CATATCTTCTCCCATTTCATCACCAACCTCCCTGCCATCCACTCCGTGGT[T/C]GTCTTTGTGTGTGTCAAGTACCTTCCGGTGTACACCGTCCCAGTTGAAGA
287772_1ds_156	chr1D	28.5676	T/C	287772_1ds_156,cttacatttgtttttcatgcactattgttcttccagggtgatctctgttgTgattccctgtgttcattcggagcagggggctgattaatagctattcttcc
1895325_1ds_2431	chr1D	28.5119	C/T	1895325_1ds_2431,tgctccccaaaaggattcatgccatctgtacttataccaaaccataagttCcttgcgtcatctgcaaagttcgggaactttctctcgatttttctccactg
IWB8524	chr1D	28.5795	A/G	IWB8524,AGGCATACTTCCACTCAGAAAGATACTGCTTATGTCGGTGTATTTTGCCA[A/G]CAACAAGTTCAGTACAGCTTTCAAGTGATATAGCCTTCATGCTAGACGGC
IWB8525	chr1D	28.5795	A/G	IWB8525,CTAGACGGCAATCAACCACCACATTTGCGGTATGAGACATTTATTTTCGC[A/G]AACAGGTTTCGAAACTCGAAACATGAAGAATGAAAAAGAAGACACATACA
IWB34714	chr1D	28.5761	A/G	IWB34714,CCCATTTACCAATGCAAGGCCCAACATGCAGAGTATCATGCGGTACCTTGCTGGCGAGTCGCAACTCCCAGAGTTGACAGATACAGATATGAGCTTCAGC[T/C]TGCTCTCTCAAATGCAGGGTCAAGGGTTTGACCGTTATGCGTTGTCATATCTTTCATTAAACACGAGCATTGGCACAATATCTGGTCTTTCAGGAGGAAG
IWB13834	chr1D	38.5523	T/C	IWB13834,AGGGACTCGCTGGAGACGGTCCCAACCATCAAGAAGCTGAGGTCGTACGC[T/C]GACAGGATCAGGGCGTCCGAGCTCGAGAAGTGCCTGCAGAAGATCGGGGA
IWB9563	chr1D	38.581	T/C	IWB9563,ACTCACGGTAGCATAGAGTGTAGGAGACTCCCGCTGTCCAGCATGAGCTC[A/G]TATATCCGCTAATTGAATATAGCATCAGCAATCTCAAACATCCATTCTTA
IWA642	chr1D	38.5527	A/G	IWA642,TGTCCGTCTGTATATCTATCTACTTATACCACCCCACCCCCCAGATAGAATGTCGCTACATTCTAATCCCAGTACAGTATTTTTTTGATCCTCCACTTAC[T/C]GCTGAGTTGTTGTGCCGTGAATTAGCCTCCAAATGTGTTGTAGAGAGGAGCGGCGAAGCATGTTTGCTCCAAAACTGCCTGCCTGTGTACATTAGTTACT
IWB34792	chr1D	38.6573	T/C	IWB34792,TCTTGCCTCCTCCAGGGGCTACTTGGTTATAGTTGTTTCATCACACTATGAGTCCTGTCGAAATTCCACCACGTGGAGTTTGCACTGGTTGG[T/C]GCAATGTACTTCATTTAGGCGATACATAAACAAGTATACACAGTAAAGCAGCAGCACAACTAGATTCTTGGCCCACATTATGTGTGTCCATG
IWB46280	chr1A	38.7149	A/G	IWB46280,GCTTTCTTCTTCTCTTTGTGGCACTCGAGGAAACTCGTCACCAAGCTGTT[A/G]TTGTCAGAATGAGTGGCCTTCTTCCTGCTAATGACCTCTAAGATGACAAC
256372_1ds_1011	chr1D	41.4319	C/G	256372_1ds_1011,aaaactctctaatcttatggcactgctaaaaaaacgaaagaaaatttgttCttataaaacaaaactaagcggcggcggttgtgggggcgatgcccttgtct
1914465_1ds_6014	chr1D	41.346	G/A	1914465_1ds_6014,tgttaaatttgagccgtatttgtgccgtatttaagttttttttaacatggGcgccgcgactgaggggcatcacgccccagcgcgcggtttagcgtcggtgc
277758_1ds_1834	chr1D	50.031	C/T	277758_1ds_1834,gtcgaaacatcatcggtgctgcagtggagcttcttgggtcatcggagcaaCgccaggccccgaaacatcatcggtgctccagtggagcttcacgggccatt
IWB43803	chr1D	50.9679	T/C	IWB43803,AGTACAATATGTGGGGGGCAAAGAAGCAATGTCCTTTTTAGATCGAGCAA[T/C]CTTGAGCTTACAGAGAATTCAACAATGTTTGAGTGAGCATTATGTCACAG
IWB9571	chr1D	50.97	T/C	IWB9571,AAGAAAAACCAAAGACTAGCAAAGTTAGCAAGGTTGGCACAGTGATCAAG[T/C]GTAGCTTGTGCAAGCATAGTGGACACAACAAAACAACTTGCAAACAAAGA
1913563_1ds_1880	chr1D	51.9986	G/C	1913563_1ds_1880,cgctatagcggactattagtgtcatttttagttttgcattcattgctttaGgggggttgagctcacgaaggttatagcggcgctcaaaacacttatcaaat
1914445_1ds_4786	chr1D	50.1924	T/A	1914445_1ds_4786,atcccaatcagtagaagagagagtgagagtgagacaagccaaatcaaattTagggcaacaagagccaagaacaccgtagccagccgtatcatataaaccaa
IWB10598	chr1D	50.7061	A/C	IWB10598,TCTTGGCTTCGGGCAGCGCTCCTCTATTCCTAACGGCATGGTGCTCGGCA[T/G]GGCACAACGGCTTGCGTTGCGTCTAGAAGACCGTTGATGGATGTAGGGAC
1887794_1ds_1527	chr1D	58.2611	G/A	1887794_1ds_1527,ttgcgtgtgcgtaggaacttttttgaaattactgcattccctaacagggcGtccaccagggcctgaagctgacggatcgccgggggcagctttagtggttg
IWB11960	chr1D	52.3582	A/C	IWB11960,TCTGCTATAGCCCCAGAACAAAACGCCTTAGATGTGGCTCTTGCAGGAGT[T/G]ATGGCAGAAGCGATTGTTCGTTCATTACTCCAAGGATGTACAGTCATTAC
1899862_1ds_3755	chr1D	54.6337	C/T	1899862_1ds_3755,agagatctcaacgcgaggaatccaacggtgaaaacacttcgtgatttggaCgcatggttcaagaggtaaaacgttctgaaaaaatgaatctatggaaaaaa
1914706_1ds_1647	chr1D	73.8514	G/C	1914706_1ds_1647,cagccgttttggcttcattctccttctccagaaattcacagcggctagtaGcattttccagttcaagcgccatcgtggatatcttctccttgtcctggcgc
IWB10763	chr1D	52.3395	A/G	IWB10763,GATTTATGTCTTTTGTTTCAGCTTCTATCGGTTATTTGGCAGAGAGACCT[A/G]GCTAGAACATTTAGCAATCATCACCATAAGATGATGAAGTTGTTTAATAC
IWB13348	chr1D	52.5747	A/G	IWB13348,TTGATGGAATTCTTGTATACAGCTATTTATAATAAACCGAAGGGAAGGGG[A/G]AAAAGAAGTAAAATATTGGCTGTTCTTTCTTCATCAACCTAAGGCTCCCT
IWB9914	chr1D	52.6547	T/C	IWB9914,AGAGGAGAGTTAGGATTTGAAGATATCACAGCTCAAGAAGAACAAGCAAT[A/G]TCATGTTGAGGTTTACTATGATTTGAACGTCCGGCCACCTATGATTTCTC
1909320_1ds_3819	chr1D	120.202	A/T	1909320_1ds_3819,agtctgcagattcccgatggagacctcaaagagacgggcacgtttcaaggAgtcaacccgggaagaagtcaaccgaagggtaaggtcacgctgcccgtgac
1914971_1ds_4766	chr1D	141.45	C/T	1914971_1ds_4766,ggatattgcagaggatgacattccattgatcaacaggcatcttgacgactCgcaaggtatatatttcgagcattccttacaccaatgttcttgtaatgtag
IWB5553	chr1D	170.649	T/C	IWB5553,GATCTTAATTTGATGTATCCTGGCACTTGTCCGTGTGTAAATCTGATGTG[T/C]AGAACACTTAGAAGTTGCTACTCGTAGGATATTCTTGCTCGTATGTGTAC
IWB41947	chr1D	170.219	T/C	IWB41947,tcatgtggactaggcgacattcctggaagggatgtgctacatgcccgact[A/G]TGATGGCGATCGCGTCTACTACGTATGTTTCATCACTGCAGCGGTTCGAG
2262336_1dl_2052	chr1D	179.44	C/T	2262336_1dl_2052,agcgaactgcaggatggtaagtaagaaccatgtagccttcattttactacCcgtaatgagttgtgttagatgacaatatctgaatcttttttcttttgcag
1883703_1dl_2039	chr1D	199.023	A/G	1883703_1dl_2039,attctgggatcaatgtaatttctgtggaataaaacactctatcgatcattAaagactcgatctcagctactaaatgaccaaaggccgaacgatctaagcag
2270277_1dl_571	chr1D	203.319	C/G	2270277_1dl_571,gattcgctgaccaccctcgacatcgggaataataagttcttcggcgccatCcctccatggataggaacccgtgttccatcgttgagaatccttagccttag
2259754_1dl_5075	chr1D	186.011	A/T	2259754_1dl_5075,gttcggctgtggatttctaaaaacagctgtgaaaaatctgctgtgaaaaaAcagctgtgaaaaatctgatgtgaaaaaaatataggtcatttggcaaacca
2259754_1dl_5136	chr1D	186.011	C/T	2259754_1dl_5136,aaatctgatgtgaaaaaaatataggtcatttggcaaaccagctgatacagCtttttcagattttggtctgcagcggaatcaaatttttgaaaagcacgtca
2258357_1dl_5139	chr4A	19.808	G/A	2258357_1dl_5139,ggtcgtcgaggggggcgtcagtggggtggctccggaggtgtcgatgaagcGgctctggtgcgttgtaggaaagagccgctgcagatctactgcggttgaca
2273319_1dl_403	chr1D	198.074	G/A	2273319_1dl_403,ccgacggttgccgcaagagtggcatgtgcttttcgtttgggatcccacacGtttcctgaaaaaaatacgactgggtttgtcttttgcattgggcacggttt
IWB7344	chr1D	206.101	T/C	IWB7344,CGAATAATAAATACTACTAGTAAGCATGGAATAATGTTCTTGCCTTTCCG[A/G]ACGTTCATCTCGCGCGTGGTGTGATAATAATGTAATCCGAGGGTACCGCA
2291367_1dl_2791	chr1D	186.99	G/A	2291367_1dl_2791,ggaaagctgagccccaagatcacaagatttctgcagtttaagccatatctGttgaccgagataaaaagacatcacagtgatagctactctaagactaccgc
2252375_1dl_79	chr1D	234.331	G/A	2252375_1dl_79,atatgaaaatttggctagggtttgctcgcagagatcggcgacacggcggcGcgatgtcggagttgaagaagaagatgtggccccggcgtgattcggaggga
997983_1dl_912	chr1D	241.808	G/A	997983_1dl_912,ccatggttcatcgctgcagcctgcagacagaccgatcgagcagtatgtacGtacacattcgcgaccagaatgacaacgctatgtatgcttcgaccgggtgg
2276361_1dl_5035	chr1D	248.174	T/C	2276361_1dl_5035,gaaggatctggatcttgctgcagcacagaaggaggcgcgcgagaagacaaTgcttgctgacaagaagcttgcttcagtcggcaagttagaagaggaaaact
2285138_1dl_5989	chr3D	96.5374	G/C	2285138_1dl_5989,catcggttttctttaagaggacgagggagaagcggatttgtagtggaggcGctttcaaaaaaatggatttgtagtggaggccctaccctagggtgccctag
2247527_1dl_810	chr1D	255.193	G/A	2247527_1dl_810,agcggcttcggcacgtgcaccaacacttgcacttgcatctgctccggcccGtgtagcggcaaccgaacgagcagttgcaccggcaacagtctaggctgcag
2254382_1dl_1051	chr1D	285.252	T/G	2254382_1dl_1051,acttagcagaaaacagagcatggcagaaacagacattatgagggcatcttTgtgagcttgattcactcaacacaaagcaacgcatgacaaaacaagcatac
2203820_1dl_1782	chr1D	285.836	C/T	2203820_1dl_1782,actgcacaggcccctgcttcatctgcacaactccatgcctcaaactctcaCgctgctgcagctgatccaccatctccacttttcactgcccatcatgtccc
2228549_1dl_1617	chr5D	461.395	C/A	2228549_1dl_1617,cagtcgccattgacgtaacagcctatttttttaattattcatgttatttcCtgagcatatctttggatcccctgatcgcctccctgtggaagccggccaga
2260402_1dl_6787	chr2B	703.325	C/A	2260402_1dl_6787,cgattttttttgtcccccgggtgggatgaactgcgcctacacacgcatttCtttttctgtgggacggatgagcaacagaaaatttgagccacaagggaatt
2225442_1dl_6271	chr1D	353.731	G/A	2225442_1dl_6271,acccgaagcgcaaattgctacctcatttcgatgacgaggcacttgagcccGtaccatcagcgcgtaatgcggttgagtgaccaccacgtggtcgggacaaa
2253523_1dl_428	chr1D	361.23	C/T	2253523_1dl_428,aagctagatattgcggaggatgacattgcattgatcaacaggtgtcttgaCgactcgcaaggtatatatttcgagcatcccttacacccatgtgcttgtat
IWB15740	chr1D	365.846	T/C	IWB15740,AAACCTGCGAGATAGTACTAGATATCAACAGAGAGCAAGAAGAACACACATACGCGCATGTACAAACGCGCGCACATACAGACACACACCAACAATCCATGATTTTTTCAACAAAGAAGAATCC[A/G]AAATCTGTAGTTCTAAACCACAGTTGAACAAATCACACGCAGACATGTAGAGCACTAAAGCAAGGACATGGAAGTAGTGGGTGCTAGCTTACAGTGAGCTTCGTGCCCTCGGCTGAGAACCCCAG
2263785_1dl_1257	chr6D	372.853	A/C	2263785_1dl_1257,tattttcctttttatgctttcttcttgtgtgtttgataaaccttaagaaaAccaaaaaaaatagtagtagcttttagctagttttttcttgctgtagtaat
IWB9807	chr7D	232.494	A/G	IWB9807,TTTCTTAAAACCAATAGTCTCATGAAACATACATGCCTCGACACGAGAAA[T/C]GCGTCGTCATGAAGTTGCATCGCAGAAAATTAACAGTCTAATCAATTAGT
2287319_1dl_5612	chr1D	388.775	G/A	2287319_1dl_5612,ggcgagcacgacgtccaggtggacattcttcctggcatcggcgagcagtcGcagggccaccagtgcttgaaagaggtttcagccatgaaggacgattaggg
IWB18403	chr1D	407.809	T/C	IWB18403,TTTCCAGAGCTTGCCGTGGGGGATGCTGACACGGTGACCCTGGTTTTTTTTTTTTTTAGGCTAAAGACACGGTGACCCTGGTGTGGCATCTTGTTCGGCTCCGAGCGGAGTTGGTTTGATGTTG[A/G]GTTCTGGTAGCAGAGTGGGTTTTCAGCTCCCGATTGCCTACGCACCCTATGTGAACAGAAAATATTTTTTCTTCAAAGTCAGAAATTTTGCAACATAAAAAAATGATCAAACTTTGTAGATGC
IWB65822	chr1D	407.875	T/C	IWB65822,TGT[A/G]GAAAGGAACATACTCTTGCTCTAAGGTCAAGTACTCTTCCCTCTCgGCAG
IWA1736	chr1D	408.074	A/G	IWA1736,GCAAAAATTAGCTTTGTTCCTCTTCTTCAATCTCCAATGGCTAATCAACGATTCTGTCTGTCACGTAATACAAGGTGAATTTCATCTCGTTTATGATATG[T/C]GCATTTGTTCCTTCAGATACGAGACAGTGGAGATCGTATTGTAGGGTAGAGGTTTGGGTGATTCATGGCTTAGCTSTTCGGATGATATCTTACAAGTTTG
IWB146	chr2A	40.6499	T/C	IWB146,GAACTGCAAACGGATTCAAGTCAGCATCAGGTTGGACGAGTCATCAACTA[T/C]GGCCTGCAACGAGGGAGATACCTTTCTATAAGTTATAAGAGGAAAACTAG
IWA3058	chr1D	407.875	A/G	IWA3058,aagaagaggagattgatgctgctgccgagagggaagagtacttgaccttagagcaagaggagtacaggcagcgagtagatatgctgaagaaacagctcac[T/C]GAGTCAAAAGCCGCACGGACTGCTAAAGCGAACAGCAAACCCGTCGGCATGGACACGGATTCCAGCGCCAGCGACTCATCGAGCGACGACGAAGACGATG
IWA1734	chr1D	408.242	A/C	IWA1734,TAACTTATATAACCTATAAATTATCTTATAAGACAATATTTTAAATACAGATTCATATGCAACACAAATATAAGGATAATCCAGAGCTTTCAACTAATGG[A/C]ACATCCTACAACCGAAAAAGACTCYTACCTTCCTATTTTCTTTATTTCATTTATTAGTTACTTGGCCATCTCTTTGATATAGGTTTTTGCCCCTGCCCTT
IWB2577	chr2A	40.8193	T/C	IWB2577,TCTGATATAGGTTTTTGCCCCTGCCCTTCCTATGGTTGCAGATTTTTCTT[T/C]AGCCCAGGCCATGTGGGCAATGACTAAACTCTTGATCCCTGTTTTATTGG
IWB35382	chr1D	408.078	T/C	IWB35382,CCAAAAGCAGATCAGCCGGTAAAGTAAGAATCCACGAGGGCCTCGAATCCACCTCGTATTATTAACTAACTGATGACGACGGAACTCGGGACGAGAGCGG[T/C]CGATCGGGGAACAATAGAGCCGGAAGGCCGCACGGTCGACGGCGTTCAATTCAATTTCAAATCTGAAACCACCGACGAGACGAACGCGGGCAGGTGACGG
IWB23271	chr1D	408.208	A/C	IWB23271,GGCAACGGCGACGGCGAGTGAAATCAAATCAAACGCGATTCGAAACGAAT[A/C]GGGAATTGATGGACAAGGGGGTGGAAACAGTCGCCGAGGCGCGAGGAGGC
IWA4585	chr1D	408.077	T/G	IWA4585,TACTCTTGATCCCTGCGTTAGTATTCCTGCCCATTGCTATCTGATATATTTATAGGAAATCTGGTCCTACATGCAAACCTGTTGTTTGTACGTGTCACGG[T/G]GTCAGGTCAGTGTCTTGACGGTTGGTTCATTTTTGTTGGCTTCCATGGGTTGGTTGCAGGACTGGATCTTGTATGTGGAGATCCCTGGGATGTTGTATGT
IWB57155	chr2A	40.6487	T/C	IWB57155,CTATGGTTGCAGATTGTTCTTTAGCCCAGGCCATGTGGGCAATGACTAGC[T/C]CTCCATGGTTGTTACACTTGATCCCTGTGCTCTCTTGGTCTTCTGCGAGT
IWB57981	chr1D	408.078	A/G	IWB57981,AACAATAGAGCCGGAAGGCCGCACGGTCGACGGCGTTCAATTCAATTTCA[A/G]ATCTGAAACCACCGACGAGACGAACGCGGGCAGGTGACGGAACCAAGGAA
2255781_1dl_2522	chr1D	408.708	G/A	2255781_1dl_2522,tactgatgtcctacaatcctctgtgattggaggccgaataaagtcttcaaGaatagaagtgtgtaaaagacatcagggtcacatggcctcgtggtaggagg
IWA4344	chr1D	408.244	A/G	IWA4344,CAGGCCATATTTAGGAAGTTTGTGCTTATGGGCAAATCTCTGTACAGTGAGTCAGGTCAGTGTTCTATCAACGGTTTGTTTGGTTTAGTTGTGTTCCTCC[A/G]CACATTGGTTGCAGGATTGGATCTGGAATGTGGAGATCCCTTTGGTGTTGTATGTYGAAGGGGATTTGAGCAGGTCAGATTTAAATGGCTATCGCTGGTG
2255781_1dl_6411	chr1D	408.712	G/T	2255781_1dl_6411,gtggcaaagctgtagatatgaacatggaagctgagatctcagcccaggatGtcatgcgagccggcggcttcggtgccaaagacgacatcggcagcctccta
2263467_1dl_4977	chr1D	410.181	C/T	2263467_1dl_4977,ttcttgatctagatcttcaccttcaacttgttcttcatcaccatttggcaCcacaccagtgatccattcattctcatcatcatctaaaacatcgaccacct
IWB29010	chr1D	410.468	A/G	IWB29010,TGATGAGAAGGCTCTAGCTTTAAGTCAAGATAATTTGTCTCAAGGACTTG[T/C]TACGAATCAAGGAATAGCATCTTCGGCCGTTCTTGGTAGTGAAACGATTG
IWB29011	chr1B	553.02	A/G	IWB29011,aaataaagaggatggtaacgatgatctcagaggatgcaacgatgagcagg[T/C]ACAAGCTCCTAGACATGAAGAACATGTACAGACCTCAGATTCTCAGCCAC
IWA3638	chr1D	409.497	T/C	IWA3638,AGTCAGCAGGTCGCTCAGAGTCCTGAAAGTTCCTGAGGTTCACAGCAACAATGTGCTATTTGCAATACCAAGACGGACTTAAGGTGGAGCTCCAGCCTTT[T/C]GCTTGCAGAACCAACCACATCAAATATCTCATGTTGTAAATTTACGTGGAGAATAATCCTGTTTTTCCAATGGAATACGTCTCTTCTTATATCAGTACCC
IWB35520	chr1D	409.501	A/C	IWB35520,AGGGAGGACCCAGTGAACTCAGCAACATTGTTTCCAGCAACCATCCTAACGTTAGTCTCTGCATTAGCTGGGACAGCCTTCTGAATGGAAAGGTTGTCTA[A/C]ATTTAATGCTGAAGCTAAATCTTCTGATTCTATGTTTGTTTGATTTCCAGCAGCTAATACCGGTCTGATGGCAGTCCCAGAAACTGGAAAATTAGAAGGC
IWB57713	chr1B	551.862	A/G	IWB57713,ACCAGATGGAAATCATTAAGGAAAAATTAAAACAAAGGACACATTTATTA[T/C]GGAGCTCGAAGGAAAAATAGAGAAACATCAGAGTGAAGCATCTGAAGCTC
IWB40888	chr1D	410.501	T/C	IWB40888,GCATGACTGACGGCTGGCTCTGGGAATGGAACCAGACGGTGACGTGGGTG[T/C]GTGAGTGGGGACAATGGCTGGCTGCGCGCGTGGAACCAGGTCAAGTGAGG
IWA3637	chr1D	409.5	A/C	IWA3637,GAAGTTTCACCTGTGAGTCACAGAGAAACAGATGTGGACTCATGGTTCACAGAAAGTACTAGGGAATCAAGTAATACTGGCTTGGTGAATGGGAATAATA[T/G]CATGCTGGATGATTGGCAAGGTTTTGCTGGTTCAGATCAAACACAGCAAAGTTCATATAATGTAGGTGGTGAACTGATGGATATTTCATTTGAGCAGCTT
IWA3419	chr1A	505.471	A/G	IWA3419,GCCTGCTAAAGAAATTGACTCCATGGATTTGTGGCTAACCAGCAATATCAAGGAATCTAACAGCTGCAGCAAAGATGTTAGTGGAATTCATGACTCACCC[A/G]ATACATGGCAAGATTTTGCTAGTTTTGGTCAAGCACAGAGAAATATGAAAATTCCTGTGGAAGGACAGTTCGTCAAAGATCCTTCAGGAACTGAACCTGT
IWB65846			T/C	IWB65846,GGACTGCAGCCAGTTCTTCAACTGATATCTTAAGTTCTCtTCTGATTGTT[T/C]TGC
2277233_1dl_3505	chr1D	410.751	A/G	2277233_1dl_3505,ttcctcttagttgctgacggtcttgctgcaattttgcgtcagaaagtacaAgaccaggagatcacgcctgtgagggtctgcccaagggctcccggcatctc
2277233_1dl_3751	chr1D	410.751	G/A	2277233_1dl_3751,tactgcccagctaatatccgagaggaggttaaggaagtgttgggggtacaGcaacatagttttgaagagcgctatcttgggctccccactccttccgggcg
IWB8739	chr1D	410.792	A/G	IWB8739,GAGGAAAAGCCCGGCAGTAACCTTGAGCTGAAGTCTTCAAAGGGGACGCA[T/C]GACATTGTTGCTGCAAACATACTGCTGAACCCCTTGCTGGAGCTGGTCGA
165071_1dl_6425	chr1D	411.369	C/G	165071_1dl_6425,accaatttagtatccaaattctgcaggttgtacgcaactacatggcacggCagaaatataggaaaaatatatgtctccaaagaaaccatcaccctctatgc
165071_1dl_6694	chr1D	411.369	G/C	165071_1dl_6694,ctcagccaccattcttccatggattaaagcgttgcgatgcaaacaaccagGaaatttcaacagtggggaaatgagccttgtcccgcacatctaaacaatac
2251128_1dl_5240	chr1D	411.749	C/A	2251128_1dl_5240,tggttgctaaccgttttctccccagacctggtctactgacggctaccgacCtcatcttctccattgttagttttctattaaagctatggagcccagcatat
2274917_1dl_1151	chr1D	411.081	T/C	2274917_1dl_1151,tcctgctggcttctaatcttctgccttcactctctgacatacatcacataTggctacatactcggcgatatccttcttcattccggtccaccagaaacgct
IWA2021	chr1D	412.024	A/G	IWA2021,CGATAAATGCTCGAACCGCCAGCCAGTTCTTCTCTATATTGAAGACATAAGGCATATATACTGCCGCCCGCTTGTTGAACCGTGTCTTGCTTGATGCAAG[T/C]TGTGTTGTCACCTGATTACTATGCTGCTGCAGTACCAGCATATCAGTATGGTTTGTCTAAGATGTTGCCGACTAAATAAAAATCTGTATCGTTTGGACTA
IWB58572	chr1D	412.024	A/G	IWB58572,CATACTGATATGCTGGTACTGCAGCAGCATAGTAATCAGGTGACAACACA[A/G]CTTGCATCAAGCAAGACACGGTTCAACAAGCGGGCGGCAGTATATATATG
IWB17816	chr1D	412.081	A/G	IWB17816,TAGATGTGGTTATGATATAACATACATTATTTCGTACATGCAGACATATGACTTGTCACTGTAGTTTATATCAGGGTTGAGGAAAACAACACCACCAGTACCCCACAGGGGATAGAGGATCTCC[T/C]GAAAAAATCTATGATGCACATCTTCCACATGGTACCTCTTCGTGGGCTTGTGTCATGTGAACCAAAACATGATACACTCATATCATCAACCTGCCACAGATCAAAATGAATAGCAACTTTCACAC
2240060_1dl_1572	chr1D	412.036	T/C	2240060_1dl_1572,cacgatctctgacagtgcgttcaaatcggcgtatccatccccgttaacatTatgggacggagggagcacttacattgccctgctactggctgggctgcagc
IWB11182	chr1B	555.933	A/G	IWB11182,TGCAACTTGCATGGTGCTTGGTATGCATGCACCTTAGCTATCCAATAAAC[A/G]TGACGTGTGTGCACAGGTTTTCATGTAACTAGAGTAAAACCCAATAATAA
IWB46866	chr1D	412.159	T/C	IWB46866,GTCACCTTGCTCGGGTACTGCACCGAATGTGACCAAAAGATTCTAGTGTA[T/C]gagtatatgccactcggttctttacaagatcatctcctagatctcactcc
IWB11260	chr1D	412.219	A/G	IWB11260,AAGGAATATTTTGGGGAACATCTTCACAAACAGTACAAGGGTATTACCCA[A/G]GCGTAACTTCTCCTCGGCAGGGGTCATATTATCCAGGCCAAGCTTCTCCA
IWA5577	chr1D	412.091	T/C	IWA5577,ATCAAAGCTGGCTGAGATCACAAAGTCAAAGGCTGAGAGGATGAATGACTTTGAGTATGCACGGATGAACACCGTCCCTGATGTGAAGCAATGGGATAAG[T/C]TATCCTACCACCAAGAAGACAACAAGATGGACCACCTCAATCTTGGCCTCATGAACCTGGATCTTAAGATGAATGATCTCAAGATGAACGAGGCTGCCAT
2207179_1dl_2124	chr1D	412.507	T/C	2207179_1dl_2124,ataacaaatctcactccgtgactagtaataactaggctgatgtgatgtagTgcatgtgtgcctcgccgctgcctggctgcctgcagtatacggtggcccgt
3948398_1al_5216	chr1A	509.058	A/G	3948398_1al_5216,gtcatcgtcattaacctttgaatgatctgaagtgcttggaacaaaatcttAtcatcacgcacacacgagaaaaaccctaacctcatcgtctaaagaagaca
2236927_1dl_656	chr1D	413.228	C/T	2236927_1dl_656,ctgttgccagctgcgctgtgtgggcgaactagtttctgcctacacagccaCcacctagtccatgcgcgtgtgggcgaactgcttttcgcccacacgacact
2101333_1dl_340	chr1D	413.413	T/A	2101333_1dl_340,tacttcagagtactacagtctacagtactactcgtatttcatttggttcaTcttgactaaggactttctgatgagttgccggagttcatcagagaaaatga
2226745_1dl_6981	chr1D	413.726	A/T	2226745_1dl_6981,tccgagtagctgcagcacatttctgataagaggagaagccaacctttccaAgggcatcaggcttgcatttttagtaatcatcgtactctatcactccatcc
2261486_1dl_9069	chr1D	413.773	G/A	2261486_1dl_9069,ttttttttttgaaacggaggcaaaagctttgcctcatccattaaataagaGagaaaagagtttgttacaagtcacccaattacacggcatgcggattattg
IWB10778	chr1D	414.303	T/C	IWB10778,ATCCCTATTAGTTGGTGGGAACAGGGTAAATGGTAAAGATATACTCAGAT[A/G]AAATTCATATAGGAAACGTAGCCCAGAGCAACAAACTAGGGACAGTCAAC
IWB31940	chr1D	414.302	A/C	IWB31940,TTATARAGAGATTTCATGAAAAATGAATTCACACATGCATCTTTGC[T/G]CACCATCTTATTAAAGGTCCCTGAGATCCTGAACGAGGAAGTCCTTGGCA
Glu-D1		NA
IWB31938	chr1A	511.1	T/C	IWB31938,GCTCGTCAGGCTCGAGAACTATCTAGTGTGRRTARAGA[A/G]AGATTTCATGAAATGAATTCACACATGCATCTTTGCTCACCATCGTATTA
2280660_1dl_1294	chr1D	414.285	T/A	2280660_1dl_1294,aaaaaatctatacacactacatggaatagagggagtaataaacaaggcagTtcgtatgaagatatgatgtattacattgcatgcatgccattgttggtacc
IWB12851	chr1A	511.502	A/G	IWB12851,gagagtggtacctttacggccggggcgagcgcctgcgccgacccgcagaa[T/C]TACCTCATCTGGGACGGCATCCACCTCACGGAGGCGGCGTACCGTTCGAT
2257978_1dl_15913	chr1D	415.095	G/A	2257978_1dl_15913,gctctctagccctccgtgtttcaaccgccatcggagactcgccttcaaccGggagagctgccaaccgtgacgctgcagcgatcatgttatccaaagggtta
IWA2340	chr1D	416.099	A/G	IWA2340,GTGCTGTCAGCAACAGCAGTTGCCATATCAGACCGGTGAAATCGAGGCTGTGGTCGGCGATCTGGTGTTGATGCATCATGGATTCTAGGTGACATGTCCC[T/C]TGGTGTACTCATCGGATAATTTTGTTGACCCAACTGATGTGTCACACTGTCAGCCATATCCGAGCGGTGGAAACGACGCTGTGACTGGTGACCAGATGTC
IWB35103	chr1B	561.643	A/G	IWB35103,ATGTTGTATAAGCCTGTAGCACTCTAGGAAATAGGTTTGCGGCCTAGTTCCAAGCGACTTCCGAAGCTTAGATGTGAGACCAATTGGCAGATACAGATCG[A/G]AGGCGGATGTAACAGATTAACAGGGTTGTGAATATTTACATTGCTTCTTTTGTATATTCCCAGGCTTGCAAATACACCCAGGGTTTTGT
IWB31799	chr1B	561.506	A/G	IWB31799,GGAATGTGTGCCCAAATAAAGCAGCTGGTAATAGAAACATTTAGTAATAA[A/G]AAGTATGGGAACAGATCTTACGTATAATCAGTGCCTT
IWA5235	chr1D	415.414	T/C	IWA5235,caaggttaagacaccaacactctttcttctcggagcaaaagatctccgtgttcctgtttctaatggcctacagtatgcaagggctttgaaggagaggggg[A/G]TTGACACCAAAATTATTGTCTTCCCAGAAGATATTCATGGACTTGACAAGCCACAGTCCGACTTTGAGAGCTTCCTCAACATAGGAGTTTGGTTCAAGAA
IWB35348	chr1D	416.129	A/G	IWB35348,GTAAAAATCATTCTAATCAGAAGGCCTTACAAAGCAACTGCTGGACGCTTCCTCCCAGACAGGGGAGGACTCTGTTTTGCCAAACCTGGAGCACCATTTC[T/C]ATTTGGAACGAAATGAACAAATGAGGTGAAAGGAGGCAACCTTGATTCCCAGGAAACCACATTGAAATCCCCTTGCGGTCGGACTCCAGGATCCATCACA
2281626_1dl_570	chr1D	416.356	C/G	2281626_1dl_570,ttctctgcagaggaggtcagagttcctcatctctgaggtggggctggaacCgacatacattgctcatcgtccgatgttgctctcttacagcctggagggcc
IWA1631	chr1D	416.456	A/G	IWA1631,AGTGTACATGTACTTCCGTGGAAGTGGAAAATCCCAAGAGTTGAAACAACAGGCAGCACGTGGTGCCCTGAGCTCTGCGTTCTGATGAAGAAAACCAGCA[A/G]CCAGAGTTGTAGCCAGGGTAGTGAGTGGAAGGAGACAGGATGTGTGCCGATTGGAAATGGTAGTCTTGCGCATCGCTGCACCGTGCGGATATTGATCGCT
974979_1dl_802	chr1D	416.403	C/A	974979_1dl_802,tcgttgttgatttagtaggaaagctgatgtttatctacacaagggacttgCtatattgcgtactcggatgcaacatttactgggccatcaaaaaggaggtt
2255306_1dl_1953	chr1D	417.145	C/T	2255306_1dl_1953,gtcttcgtcttcggcactatctgcagcgttattatctcttgtgccggtatCgctgcttttcctatggcggggcttagagcggcgccgatgacgctggcgct
IWB72364	chr4B	488.674	A/G	IWB72364,CAACTTTGTTTATAGTAGGTTCATATGCATGTATATTGATGTATTTCCTT[T/C]CTAACGATTTTTTAGTGATGCTTACTGCATTATTACATAGCTGAATGTCA
2262139_1dl_1050	chr1D	417.572	T/C	2262139_1dl_1050,ttcaacttgcttcctttttaccgccaaacacacgcgttgcttgttttcttTctcttccattccattccatgtcgagtttgttgaattctacttattcgaat
IWB51772	chr1A	516.565	A/C	IWB51772,ACAAGTTCAAGTTTCTACATTGCTTTCGCGCTCAGCGAGTGAAGCAGCTG[T/G]AAGATCAGGAAATGATCCTTCCCCTTCTGCCCCAGCGTATGTTCCACAGA
IWA4884	chr1D	419.74	A/G	IWA4884,ccttgccttgtcaaccagtatctccgaaggatgacaaatgttcccagagccgcatgaaggatggtagttccggcgaggttaacaaaatctctatggagcg[T/C]GAAGAAAGACGCCTAACTGAGCTTGGGCGGAAGATACTTGAAACATTTGTGCTATCTCACATATTTAGTGGAATTGAAGTTGCATACCARGAAGCTGTTG
IWB7679	chr1D	418.307	T/C	IWB7679,GCCGGACCATCCCTGTCCGTCATCGACTCACTTCGACCAGCGACGTCCAT[A/G]GCTACACGCCGAACTCCGATGAGGAAGAGTAATACATGGTAGTACGTCCG
2281099_1dl_9161	chr1D	417.98	T/C	2281099_1dl_9161,agatttgacctgaaatgtgtcattgaatgcatttgggcatgatcctctggTcttaattaagtacatgtcctatgggggcgtagatccttgcatgaacatat
2252364_1dl_16749	chr1D	418.518	A/G	2252364_1dl_16749,tgcagcttttctgttattaagctagccccaaaacgagctcctgaaaacaaAaaggaaatggtcgcccacgacgagcttgttgatcttgctatcccagaatg
IWB27436	chr1D	420.658	A/G	IWB27436,AGGAAGCCAACGCCAACCAAACCATCCGATGTCAAAAGGACACGTAGGGA[T/C]CGTCGGGAACTGGAAAACATTATCTTCAAGCTTTTCGAAAAGCAGCCTAA
2236906_1dl_5649	chr1D	420.924	T/C	2236906_1dl_5649,agaaaggaaataatcaaaaaacaattcactaaaatctaaatctagaactcTtggttctagtaaagcacaccccctctcaatacgaatagcaaactttatac
IWB65240	chr1D	424.989	T/C	IWB65240,ATGGTACTTCAAATACTGTTTCTCGGCCCCTCAAATCTTCTGGAGCCGAA[T/C]GCGAGCTTCGCTCAAATGTCTCAGAAACTGATCGTCTCACCAATCGTGAA
IWA4938	chr1D	422.681	T/C	IWA4938,AGTACTATAGAGAAGAATACTTCAAGTAGAAGAAACAAGGCTGGTAAAAACATCAATCTATTTCCCTGTTCTGATGATAACTCCATGGGGACATTTCACC[T/C]TCGAGAAAATAGTTTGGAGATTGAAGTACATGATGGACACCTCTCAGAAAGATCTCAGAAAAAGGAGAAAAGTGGTCAACAGAAGAAATGTGCAAGGAAG
IWA2132	chr1B	572.529	A/G	IWA2132,attctacagttggtactcctgattacattgctccagaggttctattgaagaaaggatatggaatggagtgtgactggtggtcccttggtgctatcatgta[T/C]GAAATGCTAGTTGGTTATCCCCCATTTTATTCGGAGGATCCAATGTCAACCTGCAGAAAGATTGTGAACTGGAGAAGTCACCTGAAATTTCCTGAAGAAG
IWB23391	chr1D	423.045	T/G	IWB23391,AGAACAACGCCAGATGCTTCTTGACTTTGCTCGGAAATCCATGCCCGTGA[T/G]CGGCTACAACCACTCCGGCGCTAGGGGCGGGCATTCTACTACTTCCAAAC
2232936_1dl_5000	chr1D	425.26	G/T	2232936_1dl_5000,gatatggaacttggaaggtgaacctgttttcataccattgtaaaataattGtgtttgaccaatatcattaccaagggcaaccacatgatctccgacaccta
IWA7675	chr1D	422.297	T/C	IWA7675,CCATTCCATGAACATTCTCATTGATGAAGACACAGCCGAGGTTGTGCACATTGATCTTGGTGTTGCATTTGAGCAGGGTCTCATGCTTAAAACACCTGAA[T/C]GGGTTCCATTCCGGCTGACAAGGGACATCATAGACGGCATGGGCGTTACTGGCACTGAAGGTGTATTCAAAAGATGCTGTGAGAAAACTCTGTCTGTAAT
IWB50981	chr1D	423.859	T/C	IWB50981,cttaatagcccacaggtgtttgtgaatgttgttcatgtcggcgtcggtcc[A/G]ATAAGTGAACATGACATTGATCTGGCACAAGCATGCCGAGCATGCATAGT
2237051_1dl_3543	chr1D	421.848	T/C	2237051_1dl_3543,atcaaacacgtaaattatacatgggcctatacttcctgcagtgtgcatcaTgagacaagctggcggaactgtaagattagggaaaccacacgttgtggtgc
3965563_1al_2116			C/A	3965563_1al_2116,tggctagtttcctaacatacccagaaaaaaatcaccaagttctcagcgctCgctagctatctcccagcatgccacacagctcgcccccgcacgcctcacga
3976808_1al_199	chr1A	521.266	C/A	3976808_1al_199,ttttgtgtcgtcaagtggttccttcgtgtgtatcggttgtatctatgtttCtttggtttttacaggttttcaatcaattttagtttgcataaacacacaca
IWB74596	chr1D	426.653	T/G	IWB74596,TCAACGGGGACGTCCAACTAAGCCCTTCGTCTCTGCGGATCAACCAATAC[T/G]CATGAATAAAATTTATATTTGTTGCCGCATGTCCAACAATGTAAAAAGTT
2268723_1dl_1658	chr1D	426.892	C/T	2268723_1dl_1658,attgtttttcgcaaatgataacgcccatacatgtggtattttgcacatcgCccacacgtcttgattcatcttgattctattttgcacgaatcctaaaggaa
IWB34891	chr1D	426.17	A/G	IWB34891,TGCATCAGCAAATACCCAGTACATATGGTCAGCACATGTTGCAACAACCAATGTTTCATCCAGGTGGGAATCCACAAAATTCTTTCTTTACAGGTCAACA[A/G]CAGCAGCAATTACCCAACCAGCCACCACCATTGCCGAATCAGCCACCACCACAGCTATACCAGGCTAATTCACATGTGAGCTCGCACTACAATTCCCAAA
2230427_1dl_4251	chr1D	427.242	A/G	2230427_1dl_4251,gtgcgtgggcgaggttaccccggacctcaccaacaggtttacagatgacaAatatttaattatattgcagttcttgcttaagtatatggcagcttttaatt
2226456_1dl_789	chr1D	427.923	T/C	2226456_1dl_789,aacaaattcttcttaatgacctcaagagcaagttctctattccgtaggaaTtgagaaatggtatatattcaccgagttctttcaaatggtagatgtgccct
2226456_1dl_1006	chr1D	427.923	C/T	2226456_1dl_1006,gaaaacattgctggagcctattgctgctatatgcgaaggcatggggctatCtgatagagaaatggcagttgattctgcaggttcggagattggaaataaac
2279781_1dl_615	chr1D	427.955	T/C	2279781_1dl_615,ggcctggtcggcgcgacctttgctttttttttctcctacgatgttcatcaTtagtgtcggagctgtctagccgctggcgtgggtggtcaactgtttggcat
IWA6805	chr1D	429.699	A/G	IWA6805,TGTTACCCAGCAGAACAAAAGGGAAGTTATCAGGATCTGATGGGCTAGCCTGAATTAGAAACTCTTCACGCCAGTTGTTCAGATTATCAAATGATTTCAT[T/C]GAGTTAACATCGTAAACTAGAACACAACAATCTGCACCGCGGTAGAATGCAACACCAAGACTTTGAAACCTCTCCTGACCGGCAGTATCCCATATTTGTA
IWA5514	chr1D	430.566	T/C	IWA5514,AATGAGGATACGCCATCGGGAATTCTGAATGAAGGTATCACACAAGATGGTCCACTGAAACAAGACATTGGTGGTGGGCTGAGAACAAATGCCAGCCCTC[T/C]GAATAGCAGTCAAAGATATACTACCCCYTTGGTAAGGCGCCCAAAAGGTGAGTCCAGAGAGAATCATATGAAGAATACCTCCTCAAGCAGTGCTAGCAGT
IWB51181	chr1D	431.428	T/C	IWB51181,ATTGGAAGAGTAGTTCTGTTATTTTCCCAACTGTTCATGTTGAAACCATT[A/G]TCGTTAGTTTGTTTTCGATCGATCGATTGGCGAGAGCCCTGCCTTTTCAT
IWB21141	chr1D	430.565	A/G	IWB21141,ATGGGACTCCCGCTAAGAATCCTGATACTCCTCCAGATCGCAAGTGATAA[A/G]CTGAACAATCTTGGAAGTGCCGTCGCAACAGCGCACTGCTATGGCAGAGT
2200355_1dl_10273	chr1D	430.563	C/T	2200355_1dl_10273,aagtttgacaaccgccaaccgcatatcccaccgtagagatgaggcccaggCactcattccggagaacgcactggcgtttagccgtatgtgtgcatgtatgg
2247819_1dl_2996	chr1D	432.641	C/G	2247819_1dl_2996,atggtattgctcaagtcccttcccatggacttccaggtgatcgcggccttCctgcagctgattggtgagacctcgaccctgaacatcaactttgagaagag
IWB37067	chr1D	432.019	T/G	IWB37067,taccattccctgaaatagcagggccatcatcaaatagttttgatagctga[A/C]ATTTCATAGATCGTGTGAGGACATCGAAGGCTGAGGAAAGAGCAATCCCT
2272769_1dl_11818	chr1D	432.363	C/G	2272769_1dl_11818,tacacggcattataccaggagtgggaatattgaggaatagacacttcaagCtctcgcccgcatgccctatttgccaccagggggcagaagatattcgacat
2276548_1dl_1499	chr2D	201.635	G/A	2276548_1dl_1499,aatcgctccccgctgccccgatgaacatggcttaaacctgtcatcgggccGcatccaggagagagctcctgcagcaactctggccttagatccagagcaga
IWB59090	chr1D	432.708	A/G	IWB59090,AGCATGCCAAATAATTTTAGTTCCAATGAGACATCGCTGATCACATTAAA[T/C]CAAAAGAGACAACTATCAGACCCTCTGAGTTATGCTGAGGTGAATGCAGA
IWA5182	chr1A	531.608	T/C	IWA5182,TCAGGATGCCATATATGCCAGCAGCGGCCAAGCGTGCGCCGCGCTCTGCAACGATGTCACATATGTGACGAGTAATGTATCTTACTTCCAGGGAAGTATC[T/C]GCAACCCCAACGATATCCTTTAGCTTACTTCCCAGAATTTTAAGGTCATGTGATGCATCGTGGTGCATGGCAGACATATCTGGGGTCCTAAGTACGAATG
IWB64774	chr1D	433.214	A/G	IWB64774,AGTCGCCGGAAACAACTCTCCGACGCCGCTGACGGCAAGGGTAGCTTCGA[T/C]GATGTCGTCTGACAAAATATAGTTGTAAGGTACAGTAGTACTGTAACTAG
IWB29028	chr1D	433.275	A/C	IWB29028,TGTGGTATCCTGTTTGCCATTGTTAATTAAGGGCTTGGTAATTAATAGTA[T/G]ATGGAAGATGATGTCGTTTTGTCTTGTGGCAAGTGTGATGACACATATTG
IWB19412	chr1D	433.273	A/C	IWB19412,CTTAAGTGACTGAATTGCTATCATGGCAAAGGGGGAACTGCAGTGTATCTGCACTTCAATAAGGCTGAAGTCGAAATTTGGAATTGGGTATATCGCTAATGTGAATTTCTTGGGAAACGGTCAT[T/G]CACAAAGCCCTAACATCAACGGTGATGCATAGGCCCCAGTTAATCCTAACATAGGATCCATCAAACGGTTCTTCAAGGAAGTATGTCTCTCATCCTTAAACTAAATACCATTCGGAATTGTTTCT
IWB35846	chr1D	433.914	A/G	IWB35846,ATGCATTATAGAGTATCTTAGAGAAATGAACTTTTTAGGTATTTCTATCTCTGTCACTAA[T/C]GCATTCATGTAGTTATGTAAAGGATGTTGTTCTGGGGGTCTGGGTAAACACACTTACAAT
2223664_1dl_2266	chr1D	433.459	C/G	2223664_1dl_2266,aaaagctgcagtaactgaaagatgtttcctatagtatctattgtttacctCttgaccgtccagaccaaacaaagctacccgcaagttcgaagtgaaaagac
IWB71861	chr1A	531.683	A/G	IWB71861,atgacgtaccctacggggcctccgcggccgactgacgccctgcgcgaaag[T/C]GAAGGAGGCCTTGTCAGCTCCACATTTGCCGGCACAGGGGTTTCATCAGA
IWB49445	chr1D	433.275	T/C	IWB49445,ACGGAGGAGCATCCGAGAGGAGTCATGGTGGAGGTGTTCTGGGACCAGGA[T/C]GACAACGGAACGCTCTGCGTCTCTGGCCACTCTGATGAAACCCCTGTGCC
2225509_1dl_6274	chr1D	435.74	C/T	2225509_1dl_6274,gtccttagattggttaactgatcgagctcttgcagatacatctttatttgCgatgggaagacaagaacactctctaggtcttccaagctctgcaactgtcc
1455058_1dl_49	chr1D	435.319	C/G	1455058_1dl_49,Acatatgtttcttccactcattcattcgtctgcttgcttgattagttcctactatgcttgcttacggggcactacatgctttggtcgcagggaatgggt
2260258_1dl_4291	chr1D	434.379	C/A	2260258_1dl_4291,ggagacgacatggataacttgttctctccacatatcctctacaagttttcCtttaagaacaagaatttgatgatgttgtgtcatccatgaaagagcaaatt
IWB16516	chr1D	435.316	A/C	IWB16516,TCGAGATTGATGATCCAGCTCTCCAATCAATCGAGTTTGTTCTCGTCGATGAGGCACAGAACAAATGGTCAGTGTGGCATTCAAGATCGTCATCCAGTTTTACATCTTTATCCATGTGTATGAT[T/G]CCAACAAACCTACTTGCCTCTTCATTGAACAGGTTCAAAAATAACGGCGAGAACTTCCTAATCCATATACG
2288296_1dl_6878	chr1D	436.174	T/C	2288296_1dl_6878,gaccctgtggtcccactcgggccatgtgatttggatctagcttggtgaagTatgtttttaccatggcccaggcttctcgtgcgccttcccgacaggcggat
IWB5900	chr1B	589.134	T/C	IWB5900,AAGATCGATGCTTTTGGAGAGAAGGCCATGGTCGAGCTGAAGAAGTACTA[T/C]GCCATCTTCGATGAGAAGTGCCTGTCCAAGATTCCCAAGGGTCCGTCCAA
IWB8230	chr1D	435.928	T/C	IWB8230,CATGTTGCGGCTCTTTCTCCATTTCGAGTTTTCTCTTTGGGACTTGCGGG[T/C]GGCTTCTCTCCGGTCACTTTTCCGTTCTTGTTGGATCATTCCCCTTTCTC
IWA5731	chr1D	436.19	T/C	IWA5731,ACATCAATCATGGATTCAGAAGTATATATCACTGTCGTGCYGGTGATGACCGCACCTCTGTAAAATCTCCTATATGCGGATGCGGAGTCGACACAAAGAC[A/G]CTGATCTCCTGAATATGGTTTATGGTTTTGACTACATGCTGGGTGATGTGATGTAGGACAATAGGGAAGGCCACCACAGGCACAAGGCTAAGTAACTGTG
2292347_1dl_1422	chr1D	436.367	T/C	2292347_1dl_1422,cgacataggctgcagtagtcctgctggcttctgatgttctgccttcactcTctgacatacatcacatacggctacatactcggcaatatccttcttcatac
IWB41835	chr1D	437	T/C	IWB41835,GACTTACTCGGCTTATTACTCGAGTCAAACATGTCAGACACGGATGAAAA[T/C]GGCCAATCCACCCTAGGAATGTCAGCAGATGAAGTCATGGAGGAGTGCAA
2283268_1dl_8474	chr1D	438.226	G/A	2283268_1dl_8474,tagtgatcaccctgcagcagtggtatttatacccgttctggtcctgcatgGtgcacctttctgagctctggctgtaaaggcacaatgaggatcgaactgag
IWB9455	chr1A	534.05	A/C	IWB9455,GCATGAGATTACGAAGAGATAGTGTGAAGCCTAATCGGAGCACCATGCAT[T/G]GGACGCAACATCATCACGCTATGCGGCGTATGGGTGTATGACGGTGCGAG
IWB17839	chr1D	436.654	T/C	IWB17839,CCCTAGATGTTGTCAGAGCTAACACGTTTGTAGCTCAGAAGAAGGACCTCAAGCTCATTGACGTTGATGTCCCAGTTGTTGGTGGTCATGCTGGAATTACAATCCTACCTCTGTTGTCCAAGAC[T/C]AGGCCATCTGTCACCTTCACGGATGAGGAAACCGAGAGCTGACAAAGAGGATACAG
IWB72588	chr1A	533.733	T/C	IWB72588,ATCCCTGCTGGGGTCCCAAGAAAGCCAGGCATGACTCGTGATGACCTGTT[T/C]aacatcaatgcgggcattgtcaagtcgcttattgaggctgtcgcagacaa
IWB24064	chr1D	437	T/C	IWB24064,TCACGCTATGCGGCGTATGGGTGTATGATGGTGCGAGCTCAAACTCAAAA[T/C]GCTGAAGGATCATGCACAACGCCATCTTGGCCTCAAGCAATGCGAAGTTC
IWB24141	chr1D	436.654	T/C	IWB24141,GTCTCAGAACTGCGCCTGTATGATATTGCGAATGTCAAGGGAGTCGCTGC[T/C]GATCTCAGCCACTGCAACACACCTTCTCAGGTCATGGACTTTACTGGCCC
IWB28382	chr1A	533.734	A/G	IWB28382,CAGCACCAAGCACTGCCACTTTGTAAGATGCCTCAGGTAGTATCTGAGCC[A/G]CAGACTTTGCCTTTGGCACAACCCTTGTGGTGACAGATGCCCGAAGAGGT
IWB17828	chr1D	439.346	T/C	IWB17828,AATCTTCAATGTGGCAAAAATGGTAGGGGCTACAAATGGAATTGCTACAGGCAACTAGCTCCAAGACGGCTGGTCTCTAACTCCCAAAAAATCTCCGACTTAACGAAGGACAGCCAGCTCTACT[T/C]CTCTCTTCTACCTACATATGTTTCTGCATTGCTGAAAATGCATATCTACTCCTGCATTAGCCAAATGGAACTTCGCTGTCAGACAAACCAAAAAAAATCCTCTGGGTCAATTCTCTCTTGCACCT
2251353_1dl_425	chr1D	440.787	G/A	2251353_1dl_425,catcattgtcggaggaggacgaggagttctgggggctctcggatgactccGaagagtcgtactggatgccctaggacaacgagtagttctgctagtttaaa
1034479_1dl_1683	chr1D	439.727	G/C	1034479_1dl_1683,cccaagtgccttcttctgttctccctctgcgcagtgctcctctctctgccGggcaccggcgcctccgccgtgaacttcaccatcggcgtgcagggcatggt
2262761_1dl_3962	chr1D	439.476	T/G	2262761_1dl_3962,gtaccagaaaagtagcagcatcatcatctggtgcaagagctacagctgcaTtttctgaagcttctggtgcttctagtgcaagagctgctgctgctcctaca
2232166_1dl_2865	chr1D	441.158	C/T	2232166_1dl_2865,gccgttgccgctgctgatccggaaatcaatgccgctgcagttgaacaatgCtgtgccggctgtgtactagccatgaagatcgcaacccggttcggcagctc
IWB14795	chr1B	605.933	A/G	IWB14795,TCTGCAGCTGCCTGCGCGGCAGGGTCGGTGGATCCATCACCTCCATCTGA[T/C]GACGATGTTGTGACGCTGTTGTTCTTGTGCCACTGTTGGATTTGCCGGCG
2285810_1dl_1627	chr1D	444.006	G/T	2285810_1dl_1627,aaaggaccttgggagaaacactattacattacatccagtggccacgaaagGaaatagagttcatcgatgagattcctgaagccctgccaagagcaaccatt
IWB29002	chr1D	486.067	T/C	IWB29002,CTGACTGAGGATGAGCGGTTTTCGCTGGCGTTTGCGGCACGCCTCATGGC[A/G]TTTGCAATCTGCCCAATCAGATTGGCTCCAAAGCAGTAGGCATGCCATCC
IWB4373	chr1B	689.852	A/G	IWB4373,GAGACCAGTTCAGCAACGCCAGGTACGTGTGCGATGTCTGGAAGGTGGGA[A/G]TGGAGATCGAGGCGTCGTCGGCGGCTGGGCACAACCTGGAGAGAGGGAAG
IWB4465	chr1D	486.157	A/C	IWB4465,AGGGAAAACATGGTGAAGGAAGGGCAGGAGGTCTGCTATGATAAGTGGGC[A/C]AAAGCAGCTGGAGTTGATGAAGCGGTCCTCAAGAGTAGACTGCAAGCAGG
IWB1997	chr1B	676.193	T/C	IWB1997,GTTGCCACGGCGATCGCTTCGAGAGTAGTCATGTTCCTTCCTCGCAACAG[T/C]GACCTAGACCAGCTGGCGGACATGTGCTTGTCGGTCGATCCTCCATGGGC
IWB644	chr1B	674.661	A/G	IWB644,GCCATCTTCCGGCACTCCTCCTGCAACGCCTGAGCGGATTTTCTCTCCAC[A/G]CTCGGTATGGCAGGAAGGTCGCCGTCCGACCATGTCGGCAGAGTCCTCGC
IWB25377	chr1D	485.754	A/G	IWB25377,tttttatgtggacgagagagggtgtctttgcagtggagctcaagtcaatg[T/C]GGTGCAACAAAGTTTTTGAGGCTCAAGTCCCTGCAACTATCTTCCCCTAC
IWB8874	chr1A	563.781	T/G	IWB8874,ATGAATAGAACTTCGTTAATGGTATAAGAGACTCCAGAATGGCTGCTCTG[T/G]aaagtacttcatgtaggttgctgatcaaataaataattaaacatnnnnnn
IWB9028	chr1D	485.437	A/C	IWB9028,GTTAGGCATGCATAACTGATAATCCAGTTACTTCTGCTTACTTGCAGCTG[T/G]GCATAATTTCTTCCAAGGATCCAGACAACTCAATCGTTCAATTCCTTGAG
IWB24639	chr1D	484.417	T/C	IWB24639,tccaagcccaggtcaacatggcatttgggaggtttgatgcagctattgcc[A/G]TAGCTGAGAAGGCCAGAGCTATTGATCCTGCAAATGCAGAGGTTGGATTG
IWB11781	chr1D	484.416	T/C	IWB11781,GAGGTGGCAGAGAGCAGAGTTGCAAGAGATGAAAGAATTGCTCAAGGCTG[A/G]TGCAATGGTGGGTACTAGTGATAGTAGGAAATGAGGGAGCCTAAATGATC
IWB1147	chr1B	677.093	A/C	IWB1147,TCATCCGAAAGGTCAGGGAAGCTAAGCGGGCAATTCGATCCAGCACTGGG[A/C]GGAATCCAATAGACGCGGAGATCGCGACCTTCGTTGGCGCGTCGGTTGCC
IWB42332	chr1D	485.563	T/C	IWB42332,GGTGGCGGTCCAAATCCAGGCGGGACTGAGGGTTCAGGATCGTCGCCGAG[T/C]gaggcggttatgcactctgttcccatcatcacagttcgttcttgcggtct
IWB62426	chr1A	582.867	T/C	IWB62426,CACTAGAAGGGTCTATGGGAACAAAGACGCTGCTTGATGCTTCCTGTGAC[A/G]CACTTGGTGTCCGTGAAACATTTTGGTTAAACTGCTGACCCGACACGGTA
IWB53955	chr1D	485.558	T/G	IWB53955,TGCCTGAACCTATCATCCAGATTGGTATTGCTTGCCAATAAACTTCGTAG[T/G]GCTCGCAGTTCATCCGGGCTAGCTCTCTGGAAGAGCCCCCTCAGGACAAT
IWB57985	chr1B	674.669	T/C	IWB57985,ATGAATCAGCAGTGTGCACAGATTACCCCATCAGTGGATGCTCTTTGTTC[T/C]gagtgcccttcggtgaattttctgaaggtaaatgttgatgagagcccaat
312083_1al_3826	chr1A	583.894	C/A	312083_1al_3826,aagcgggcaattcgatccagcactgggaggaatccaatagacgcggagatCgcgaccttcgttggcgcgtcggttgccaatgttagattggcgcggaagtg
IWB74942	chr1B	678.264	T/C	IWB74942,ATGCTTGTGTATGAGTACGTGAATAACGGAAACTTAGAGCAGTGGATTCA[T/C]GGCGCCATGCGGCAGCACGGTGTTCTTACCTGGGAAGCTCGAATGAAAAT
IWB1342	chr1A	584.674	A/G	IWB1342,TATAATGTAGCTGTTTCCCCCTAAAGCAACTTTATTACGTTTCTGAAGCC[A/G]TGTGCGTGAATTCCTTATATTGCCCGATTGAGACGGCCTGGCCGTCCTAA
IWB3443	chr1D	487.172	T/C	IWB3443,GATAGCATGATGAGCATTTCCTGTAGGACATTGCATTGCGCTTCATTTTG[T/C]ATTGTAGGCGGTAGAGAAAGAGCAGTGCTGATTGATCATGCGTGATCATC
IWB41436	chr1A	584.355	T/C	IWB41436,AATTTTGCCTATGTGAGAGCAAGCCAAATTGGATGCCAACAGCAGGCGAG[T/C]CATGACGATCCAACATGGTTCTGTGCAAGCGACGAAAGCATCACAGAAGT
2251544_1dl_4621	chr1D	487.19	G/A	2251544_1dl_4621,agtgcaagtacaactacgttggttgttgcatacacatgctgagtgcaaagGcaggttggccatatgagccagtatggctacaagtctacaaggatctgcag
2265875_1dl_13368	chr1D	487.294	C/A	2265875_1dl_13368,tgtaggaattttactggggttagtgacctagacggcgtacatacagccacCaagttgcaaagcaagacctgtcagattttgtccagagtaaagaaagaaag
2265875_1dl_13343	chr1D	487.294	A/C	2265875_1dl_13343,atcaaataactatcattatttattttgtaggaattttactggggttagtgAcctagacggcgtacatacagccaccaagttgcaaagcaagacctgtcaga
IWB29616	chr1D	487.642	T/G	IWB29616,GCTTCCTTCACCTGCTTTGGCTGCACACCTGCTAGGCTTGAGGGCGCATC[T/G]cctccgaaattgagctcaagtaacacgcggcagcaaattatccagttcca
IWB66084	chr1A	586.954	T/C	IWB66084,GTC[A/G]CCGCAGCAGtGcGAGGATAAGTTCAATGACCTCAACAAGAGATACAAAAG
IWB43272	chr1A	588.3	A/G	IWB43272,TGGAGCATACCATTGACCAGCACAACATCAACTGTAGTGCCATGACCTTC[A/G]atgaccttgacttccaggacagtacactggacttcatcaacaaaagtaag
IWB62784	chr1B	680.867	A/G	IWB62784,TTAATGTATGCTGTAAATTGGTCAAAAAGGTGGTATATTATATCTGCCAC[A/G]AAGATCTTCACGCCAGACTCTTCTGCAAGATCACGGGCATCAGGCATCAC
IWB75022	chr1A	586.954	T/C	IWB75022,TTGCCACTCTGGGCATCAGTAGCATCCTCAGTCATATCATGCTCCTCGTC[A/G]TCACTGATGGAGTTCTTTATGAGATGGTTGTGCTGCTGCTGCTGCTGGTG
IWB26021	chr1B	679.749	A/G	IWB26021,ATTGCTTTCCATTTGCCCTTCTTCTGCATTACTGTAATGTTCCTCCTCCC[A/G]CCGCCCAAATCCGCCCCAGGATCCTCCCCCGTGTAAGACGCTGCGGTAAT
IWB59764	chrUn	2.2234	A/G	IWB59764,GCAGCCAGAGAGCTATACTGTGGATTCTCCCCTACTGGGTTCAAATCAAC[A/G]CAAGAAATCTCATGTTCTAGCTGCGCATGTTTCAYTTCAACCAGCTTAGC
IWB4263	chr1B	680.862	T/C	IWB4263,tactccmyrrsccgcaaaggaggctgagccggaggaggctaaaggtgggg[A/G]TTCTCTGGCTGCCCCAGATGCCGATGATGCCGGCGGAAAGAAATCGAAGA
IWB25248	chr1D	488.577	A/G	IWB25248,AATCTGTTGACAAACTCTCCGAGGTGGTACTCCCCGACCACCTCCAGCCT[A/G]CCCCTCTCCTCGTCTGTGGCCGCGTCGCTATTCTTGCGCACAGTGAAGAG
IWB27548	chr1B	680.864	A/C	IWB27548,CAACATTGACGAGGAAGAGTATGTCATGGTGGACCAGGAATCTCAGTCTC[A/C]GGTGGCAGAATCTGAGACAAAAACAGAACCCGACCAAGAGGTGGAAGAGG
IWB17626	chr1D	489.719	A/C	IWB17626,ATACTCCAGTTAAGTTGGAGGTTCAGTCAAAACAAACCAGTGGTACAGTTGCTTCTTCAGTGGGAGGAATTGGGCGTACA[A/C]AGGATGTTGCTGCAGAGGGGAATGGAGCAAAGTCTGGCACAGGATGTACTAGATGCTTAAAAGCTGGTCATATGATTAAGGATTGCACTGAGTATTTGTTCTGCATTTATTAGGGTCTCTAAAAT
IWB55371	chr1B	683.475	A/G	IWB55371,tcaaacacacaagaaaagccgaagacggagctccaggcagagcgcaggag[T/C]GAGCGACATGATTCGCTCGGAGAAGCGGTCAGCGGAAAAGCGTCGGCGTC
IWB2612	chr1A	588.904	T/G	IWB2612,AACATCACAGATATCTTGCATTGCCATCAAAGAACATCTAGTAACACTAC[T/G]AAGTCATATCATATATAAAGGTGGCAGATCATACAGTCATATATAGGTGG
IWB36386	chr1A	589.042	T/C	IWB36386,ACGCTCCAGGTCGCACCCAGACAGGTCCCAGGTCAGGGAAGCAAGCCATGATCATTGGCAACAAGAAACCAAGCACATCTTTTGGAAAGACAGGCCCGT[T/C]AAACACACAAGAAAGCCGAAGACGGAGCTCCAGGCAGAGCGCAGGAGCGAGCAACATGATCCGCCCGGAGAA
IWB11905	chr1D	490.927	T/G	IWB11905,acaaatcaagcctagactagaggacccccaatggtgcaagataactagaa[A/C]CAAGAAGGTGACTGATTTGGCTGCGTCGGTGGTTATTCTTGCTACTTCTG
2290346_1dl_551	chr2A	761.511	G/A	2290346_1dl_551,gctgggtgggcgattggctggtgctctgcagtttgtggttgggtgagagcGacgtgaaggggtgggttttcgctggtctactcgaccgtgctctaccctgc
IWB55372	chr1A	589.043	T/G	IWB55372,TTTGCTGTTGCTTCATACTCCACCATGATGACTCGCAGTTCATGTCAGAA[T/G]CTGCGATGAGACGAGTGTAGAGTATCATATGTGTAAATCATTCTGGGATG
IWB15653	chr1D	491.05	T/C	IWB15653,CAAAATGTGCATCGAGGCTCCCCCCAAGGAAAACTTTGAGGCTGTCTCACGCCAAAAATTTACATATGTGCAGTCCAGTTACATCACTTCGAGATAGCATGGTGTTGTCGCTGTACGATGCAGA[T/C]AAGGAATTGGTATCCAAAACAGGTTTCTTCTGTTAGTTTGTTATAATAAGCCTATCTTATATTTATCATCAGCACACGTACCAGCTGATGATGTGCATCATGGTTTCATGTAAATCACAACAGAA
IWB6105	chr1D	491.636	T/C	IWB6105,ATATTATTTTGTGACACCAATTCTTTCATGGTATGTCGGTTTCGGTTCAT[A/G]CTTCTGTAGTAGATGAGCCGCGCCGATCAATAATGTAGTGTTTCGAAGAA
IWB50170	chr1D	492.172	A/C	IWB50170,gtcagtccgtgctgaattgttcagtgctggcctaacttttaaacaacctg[T/G]TCAGTTTGATTATACTTTCTGCAGCAATATTCTCAATACAAGCACTGTAT
IWB29029	chr1D	493.705	A/G	IWB29029,AGGACCCTGTCTTTGCCACCAGAGACAACCTTCTCGCCGTCGGGGCTCCA[A/G]TCCACGGCGTACACCTCGTCCGCGTGCCCTGGCAGGTCCTGCTTCAGCTT
IWB7260	chr1A	590.342	A/C	IWB7260,gctcgtcgaaatttgctcatggatggtctgtttgtgttctatgtttcccc[T/G]TGCAAACATCTAGCCTGGTGGTGCTAAATTTGCAGTTATGCTGAACGTGC
IWB65962	chr1A	590.551	A/G	IWB65962,AAATCCCAGCACGGGAAAGCTTCCGGAAGTCCTTGAAATTAACTTCAGCT[A/G]CAA
IWB64147	chr1D	493.486	T/C	IWB64147,ACGGCTGCAGCCAATGTGGAAAAGCAGCTTCTATCAGCTAAAAGCAAAGA[T/C]GACGATGATGCACAGCTTACCCTGCAGCAGGCGGAGTACTCGAAAGATAA
IWA3764	chr1A	590.345	A/G	IWA3764,CTTTTGGTGGTTCATTCCATTCTGTTATAACCATTACTGGAGCTGCGTACCGTGTATCTAAATCTGATGGCCCAGGATATTTTCATGATGTCGGGAAAGA[A/G]GCATTAGAACTGATCAGGGATCCTTTTTACCTACAAAACCATGTTTGGAATTCTGGTCGTAAATCTTCTCTGATATGTGGCAGTGAATTTACAACTAGCC
IWB56380	chr1D	493.765	A/G	IWB56380,TCCTGGTGACGGGCGGCGCGGGGTACATCGGCAGCCACACCGTGCTGCAG[T/C]TGCTCCTCCAGGGCTTCCGCGTCCTCGTCGTCGACAGCCTCGACAACGCA
IWB54456	chr1A	592.314	T/C	IWB54456,GCAAGGTCACCCCTGATGGTTCCTGGCTCAGATTTCGATGGGTCCGTGGC[A/G]CCGATCAGCTTCCTCCCGTACTTGATAACGCCCTCTCCTTCCCATACCAT
IWB60227	chr1A	592.088	A/C	IWB60227,tttagtggggcgttggcgagttgtcggacgcggcggatggcctcctcgga[T/G]GCGTTGTCGAGGCTGTCGACGACGAGGACGCGGAAGCCCTGGAGGAGCAA
IWB35305	chr1D	493.767	A/G	IWB35305,CTGTGATCCACTTTGCCGGGCTGAAAGCCGTCGGGGAGAGCGTGGACAAGCCCCTGCTTTACTACGACAACAACCTCATCGGCACCATCACCCTCCTCCA[A/G]GTCATGGCCGCACATGGCTGCAAGAAGCNNNNNNNNNNNNNNNNNNNNNNNNNNNNNNNNNNNNNNNNNNNNNNNNNNNNNNNNNNNNNNNNNNNNNNNN
IWB57242	chr1D	494.469	A/G	IWB57242,ttgagcgagagaaattgcaacgaacagatgttcccgttgaggcggaggaa[T/C]GGGGACACCACTGAAACTGTTGAGATCACTGTCTATGATTACTTTGTGAA
IWB63464	chr1A	593.299	T/C	IWB63464,AACTGTGACTACTATATGCGAACTGGTGCTTGCAGATATGGCAAAAACTG[T/C]CATTTTAACCATCCAGACCATGTGATTGATGCTCAGTTCAATCCACCAAC
IWB29387	chr1D	495.127	T/C	IWB29387,AGGCCTGACCTGGTTTTGCCGATTCCGTTCGTGCCTGATGACAAGGGCCA[T/C]GCCTTCGCGCTCAAGGACGGCWSCGCMTACAGCTTCCGCTTCTCCTTCRC
5244435_2as_931	chr2A	21.5214	G/A	5244435_2as_931,ggtggcgggtcctggtggcgtccgatgacgggcagcaggtggtttgcttcGtgatcttcagcggcaccagccctgcctagttctcctttgcaattatctct
5257537_2as_1509	chr2A	21.3404	G/C	5257537_2as_1509,cgcagcgcagtggaagcatgtctgcaggtccgtccagcagtcgagcaagaGcaaggtttccatcacgccactcaaccccgatagcgccaaggagctgcctc
5283411_2as_8583	chr2A	21.6328	G/A	5283411_2as_8583,agtggaccgacactaccgttcatgcaaggagaagtggttgggtgcgtcgcGccatggccaatagtggcaacggctttgacaggattaatttcacattcaca
5258582_2as_2534	chr2A	21.6214	G/A	5258582_2as_2534,atttcagaattgttatctatgttcgcttagtgggaggagatgctcatgtcGactacggaggcgtctatgatgacttcgtcaatctcaagatgatgcaccaa
IWB9642	chr2B	34.4192	A/G	IWB9642,CCATTGTTCTCACATTTCTCCTTGAGTTCTTCCGATAACTTGTGTGCCTC[A/G]TTGGATCTGACAACCCGAAGAAAAGGTTTGCCAGAATTGCATAGTCCACT
IWB9974	chr2A	22.1911	T/C	IWB9974,GGAGGGCGGCTTCGACATGGGGCGTCAACCGATCTGCAGCGCGAGGATCC[T/C]GGAGCGGCGGCTCCGGACATGACGGTGATGCCGTCACCTCCGACGGGGAC
IWB71414	chr2A	21.5327	T/C	IWB71414,GAAATACATCAGGACTGCAACCATAACATAGCCGGACCTACTAAATCTGA[T/C]tgcgtggttatcagtccaccagaacaagggttggttcacaaccatgataa
5237958_2as_10729	chr2A	22.1912	A/G	5237958_2as_10729,nnnnnnnnnnnnnnnnnnnnnnnnnnnnnnnnnnnnnnnnccgccgctccAggatcctcgcgctgcagatcggttgacgccccatgtcgaagccgccctcc
5305462_2as_2669	chr2A	23.4777	T/G	5305462_2as_2669,cggagcactccctcctccctcgtcagtcaccgcctggttttcttgatgggTgcggaggagtaggggatcccgccggatcagaggcgtgcgggcacggcggn
5235477_2as_3967	chr2A	23.8868	A/G	5235477_2as_3967,tcatatgcatatattctcatgaactttcttttatttagattctaaaagccAgatatatgtacaagacaacgttgatttgcaatatatcaaatggagcatgc
IWB57168	chr2A	24.0295	A/G	IWB57168,TACTGGAGGGAGAGCATGGCAAGGCCGGACAGCGTCCTCTTCCTTAAGTA[T/C]GAAGAGATCAAGTCTGATCCAACGCAGGTTGTGAGGAAGCTGGCGAAATT
5258164_2as_11462	chr5B	38.4666	T/A	5258164_2as_11462,atagcggagcaagtcttgggcacgtggtcttggtgctctactaggctgccTctccaccgatgtcgccgtccctacagcttcgaggtcgagatcatcatcca
5215295_2as_1559	chr2A	23.9359	G/C	5215295_2as_1559,tctctgattcccaccagatatcaggccacaaattttaacacaatgtaagaGcgccaaatcaaaggccgcaagccaaaagaagcagataccatccatgactg
IWB10120	chr2A	24.1505	A/G	IWB10120,ATGTTCAATCAGGCGGTGCGGCTCCTCCGGGAGCCCTTGGAGCGGTCCCT[A/G]GCCGATCACCGCGCCGACCTGGACGCGGTGGTGTCCGACAGCCTCTTCCA
5254682_2as_5057	chr2A	32.9417	A/G	5254682_2as_5057,cgcccacggccggagcagcggccacacccggccactgccctaccctcgtcAcccggcaagctccaagtgatgggatctacggtagggtgcggcgactgcaa
5254682_2as_5033	chr2A	32.9418	C/T	5254682_2as_5033,cactaccggccctccgcacactgccgcccacggccggagcagcggccacaCccggccactgccctaccctcgtcacccggcaagctccaagtgatgggatc
IWA5087	chr2A	33.0442	A/G	IWA5087,GATCACAAAGGAATTGTCAAGATTACATGAGATGGCACTGCAAAACAGACTAAGCACCAACGATATCACTGGTGGAACCATAACACTGAGCAACATAGGC[A/G]CCATCGGTGGCAAGTTTGGCTCTCCTGTTCTCAACCTGCCTGAAGTTGCGATCATTGCGCTCGGCCGCATTCAGAAGCTCCCTCGCTTTGATGATGAAGA
5273051_2as_13875	chr2A	33.2703	T/G	5273051_2as_13875,tgcatgcatgttatatataatagtgtgcatgcatccatcatctatatatcTccaattggagattcgtgcaacattttctagtttttgtcaaaattgtcttg
5228901_2as_1097	chr2A	34.3563	T/G	5228901_2as_1097,ttttgggcttggtcccgggcggtgtcgatctgcagccgctgcttgccgcgTgcgtgtggcggtggccgaggcaccgagcaaaacgaacaagcgagatagga
IWB38844	chr2A	34.4992	T/C	IWB38844,GAATTAATTGAAACATACGTGCAATTAACTRGTTTAGACTGTAAAGTATG[A/G]AATACAATTCCTGCAATCAAATAATACGAACTTGGCGCAGGTAACTATCA
5228901_2as_1093	chr2A	34.3563	C/T	5228901_2as_1093,caaattttgggcttggtcccgggcggtgtcgatctgcagccgctgcttgcCgcgtgcgtgtggcggtggccgaggcaccgagcaaaacgaacaagcgagat
IWB10896	chr2A	34.6653	T/C	IWB10896,AGGTCGTCGATCAAGAGCGGCGGAGGACAAGTTTGAACAGCCGACAACAT[T/C]GCGTAGTGGATTCAGCGTGGAGGGAGGAAGCTGGCGGCGTTAACCTAGCC
5233155_2as_2250	chr2A	36.6278	G/A	5233155_2as_2250,agaaaaaaagggaaagaaattgacagaaagaaacgcgcagaaggaagaggGaaaaaaaatacgactagtattcaatgattctttgcccctggtcgggctcc
IWB54293	chr2A	36.6291	T/C	IWB54293,GCATACTGCACTTCCTCTGGACAAGCAGTGGCGATGGTGTGGTTGGCCTT[A/G]TGCAGCTCCTTGGACAGGTGGTCATAGCGCTCAACAAGAGCCCTGTATGC
IWB1996	chr2A	36.1387	A/G	IWB1996,GCAAAGCTCGGCTCGGTCCAGCTGGTTGGGTCGATGACGATGCATGGATC[A/G]tccttcttgaactcagccaccatttctccacagctggggcagtagtgctg
IWB34575	chr2A	36.6311	T/C	IWB34575,ATTCACTTGGTCATGTGAATGCATATTCCTCGGAGGTGAGAGATGAAACCTCTCTCTCTGTACCAGCTAGAGATTCTGAGGAAACCAGAGGAGCGTATCC[A/G]GTAATATCAGAAGTACCAACAGATTCAGAAGATAAGGTCAACCACACTTCTGATAGTCAACTCGAAAAGAAAGATCCAAATGTCAAAATGCTTGCAAGCG
5256153_2as_5951	chr2A	36.6632	G/T	5256153_2as_5951,tagatatagcctgaatgggaaaaagatgagcaactctggacagagcatctGcaatagtgttctcaacccctttcttgtactgaatgctgaactgcagcccc
IWB54033	chr2A	36.9328	A/C	IWB54033,GGTTTGCTCTGACAGCGGCGACTCCAAGCATTCATCTCCTGACCAAGTGT[A/C]TCCATCGAGCTCTGGCGTTGGCGAGCGGAGCTTGGCATCGTCGTTCTCAC
5253688_2as_3110	chr2A	36.719	C/G	5253688_2as_3110,tcgccttggtacccgcacgcaccacctgcagcacgcccacgcacgcgtcaCtactcgatcactacgaaatacgtacacgtaaacaacaactactatgtact
IWB70473	chr2B	55.993	T/G	IWB70473,AGCTTAAGTTCCCGTGGTGGTGGTGGTGGTGCATAAGGGTGCTCCAGGAT[T/G]gttgtctgttgcagtggctgctgcaaggggaatactgcgcttgcgatggt
IWB72185	chr2A	40.6509	T/C	IWB72185,ccaggttggtaagagatccaacgcttcattatccaatcaatcaaaatgac[A/G]AACAGAAACCAACTCTCCACCCTATGATTCATCTGTGCAGAACTACTACA
5265248_2as_3077	chr2A	40.761	A/G	5265248_2as_3077,acctcctggtccagtacgcacgtcagtcgtccccttgccaatgcgattccAcagacacaaggaaggatgggggtcggatctgcagcatgcaagccatatat
5230274_2as_733	chr2A	70.8061	A/G	5230274_2as_733,tgcatctcagtacgaccccagctacaactttggatatccaccaggctagcAgtggtcatagaccaacttaggccaaaagcctaagcttgggggagtacgta
IWB56992	chr2A	70.877	T/C	IWB56992,TTGGCAGGGTACACACCAATCCATTAGGAGATTATAGTTAAGGGTAGATG[T/C]AGGAGGTCAGACGCCTGCCTGCCAACGGAGATCTCATAGGATACAATTGG
5237494_2as_6159	chr2A	70.9235	T/C	5237494_2as_6159,acttgtaaagcataacggcatagaagtgcagggtttcgaaagatacctcaTcgggattgaagcacaccaaaagcacgtttcacatcctttctaacactctc
IWB30556	chr2A	74.7896	T/C	IWB30556,GGATCTGATGATGCAACATTGAGGATATGGGATCCCAAAAGCGCACAATG[T/C]agacatgttgttcggggtcatggctatcatactcaaggattgacatgctt
IWB72481	chr2A	72.3816	T/C	IWB72481,ctctagctacatcatacatgccttgtgtgagtcgaggtcaccctggactc[A/G]ACCATGTCCTCATCGTGCTCGTCGGCTTGGGCTTGGGGTCCTGTTCATCC
5304653_2as_5397	chr2A	71.3889	G/A	5304653_2as_5397,cacgaggataaaggaggcgcaggaactattcaaaaaggggaaaatgacccGgaattttatctgtttgaagattaacatcatgtatacaaaataaaaaaggt
IWB36470	chr2A	70.9844	A/G	IWB36470,CCCTCTCCCTCCTGGGTGAAGAAGATGGTGCCCTTGACACCCTCACTGCC[A/G]gtaagcacagccacagccttcaccattgtgtgtgtgatctcaggtgaccc
IWB61437	chr2A	70.9869	T/C	IWB61437,ctgaaacctctctcgttttctgtaaacacgtccagagctagtagcgaaca[A/G]CAGATCCACAAGCACTTGACAGAACTGTTCCAGTCACACATCTCGATAGC
IWB47796	chr1A	551.487	A/C	IWB47796,TTCAGCAAGGCCGTCAAGCTCGCCGGGTTCACCCCCTTCCTCTCCGCCGT[A/C]gacgccctcaaccagtgcaatgccatctccgaagggatcatgactgacga
IWB4499	chr2D	74.9354	A/G	IWB4499,gcatcatcggctcctgctgcagctgctcctgccgcttccaaggatgaaga[T/C]GACGATGATGACATGGATCTGTTTGGCGATGAGACCGAGGAGGACAAGAA
5272901_2as_19	chr2A	74.7225	C/T	5272901_2as_19,aAatttgctactgtcctacaaacctctgcacttggaggcccaacaacgtctataagaagaaggttgtgt
IWB14764	chr2A	72.7406	A/C	IWB14764,CACCGTGAACCCGCCGTCGACGACGAGGTTGTGCCCGTTGACGTACTTGG[A/C]CTCGTCGGACGCCAGGTACAGCGCCGCCCTTGCGATGTCGTCCGGCTCCA
5272901_2as_272	chr2A	74.7223	C/G	5272901_2as_272,atctgagtttgaggtggaaaaggctgtcgtcgactggattcaaggatctaCtgccgagcacgctcgtcgagtgcatgctgcaggttctccagtcgagtgcg
IWB25847	chr2B	114.046	T/C	IWB25847,TTGTGCTAACACCATGCTCATTTAGGTGGCAAATCCTCCGTCCTCATGGA[T/C]ATCAAGCCATGGGACGATGAGACTGACATGAAGAAGTTGGAGGAGGCTGT
IWB8160	chr2A	74.1645	A/C	IWB8160,TGGAGTTGGTTTGAACTTTTAATCTGTCATTCCAATGTTGATGAAATGTG[T/G]CTGGTACGTGTAAGCTTAGCAGTAATGCATTGATCAGATCGATTATTCGT
IWB22683	chr2A	74.7894	T/C	IWB22683,TTAGCCATTACTCCGGACTCCCAGTCAATTGTTAGTGGCTCAGAGGATAA[T/C]tctgtgcacattgtgagcataaactcaggccaggttgttggttcattagt
5243185_2as_2330	chr2A	74.5543	C/G	5243185_2as_2330,cgtccgctctggttaatctcatctgcccgtgtagtgccgctaataaatgaCtcgtctggtttggtcgtcacgcctgcagttcatcatcctgagtggtgagt
5188592_2as_984	chr1A	518.493	T/G	5188592_2as_984,cctatcattctttgaaagaaatgttaccatctgacgactttttaggttccTtcaatgcggcaacggcagcccgaagttgggtcttgcattcctccagctcc
5209842_2as_6519	chr2A	71.3527	G/A	5209842_2as_6519,agctcagctcatgatcacgtccttgtgtttgtctgtccaacattgacctcGtctgtggtggtggcacgaacaagcaaatcaagcgcctccacaacagctag
5304394_2as_1710	chr2A	74.1374	G/T	5304394_2as_1710,tgggtaacaaatctgtccacaattaattttgcttctctttagttcggttgGtgacagtgtggcttactcaatctcctttgtatttttattaggccaggatc
5204692_2as_2191	chr2A	74.7664	A/G	5204692_2as_2191,aagtctagcggcggggcaggtccgtccaagctgaagctccatccaaggacAtagtggtgcgtgcctatactgagacctgcagaagccgagaagccgacgta
5235903_2as_460	chr2A	71.2562	G/A	5235903_2as_460,ggacatctgccgtgacaaacccacgacaaagatcaagtctgagaaaatctGaggaatgtcatctgaaaagatcgacatggacctagagagggggtgaatag
IWB32426	chr2A	75.1378	A/C	IWB32426,GTAAAATCAGATGTAACAGCTGTTTCTTGGTTATTACACATTGATTACTT[A/C]ATCTAACATCTCGCCTTTGGTCGAGTGCAGGGTAGAAGATACGAGCTCGT
IWB53663	chr2A	74.9607	T/G	IWB53663,AGCTCGAGTTTTACTGTTGCTGGCTGCCAATAGTACTCTGTATCTAACAG[A/C]TTTAGATCTGTAAGCTTCATACCATACCTCAGTTCTGAACCACGAGTCAG
IWA562	chr2A	75.1393	A/G	IWA562,AACTAGATGCCCTTTTGGGAAGGTTTTATCTCCTGATTCTAGCTATATTTGTGCTCGTGT[A/G]AAGTTTTCCCTGGAAATACTAGTAACTTAGCTTGTAATAGAAACGATGTTCCCTAAACAT
5242844_2as_926	chr2A	75.7189	A/G	5242844_2as_926,agagccagccccgcccctgccgcttaagccgttggacactgaactgccacAtctcaacctgacgctacggcccatcctcgtgcaactccgcgggcgaggtt
5242844_2as_1115	chr5A	51.1553	A/G	5242844_2as_1115,gccgccgcctgccctcgggtcgactgcgtccgtttcaagctgttcaagtcAccgtctccgccgtctcaaacacgatgctgctgcagtttctgagccgccgg
5271037_2as_444	chr2A	76.0316	T/C	5271037_2as_444,cacggctggcctggcggatatccataatagtagttggggtcgtactgcgaTgcagcggctatcgcctcctgagctgcagcgaggcgacgagcggcctcagc
IWB8679	chr2A	77.1579	A/G	IWB8679,CATGCGCTTAAACGTGGTCAATTAAGTCGCAGTGGAATTTGGGTTGGCCA[T/C]AGTGGAGATGGTCGAAAATCAAGCTTTAATGCAATTAGTGTTGGATGGCA
5289118_2as_775	chr2A	75.3512	G/A	5289118_2as_775,tggccatgaggagctcgtgctgtcacaccagtcggacagtcggcgcacccGgcacgctacgggtgaattccgtcagcgtcattaggaactgcacgatcccc
IWB1573	chr2A	77.1654	A/G	IWB1573,TGTTGAACGTGGCCGGCCTTAGATGGAGAGATCGCTGCTTCTGAGCGCAT[A/G]TGCGACATCGCTGGCGACGGTGATGCAGAAGAAGAGCCAGCCGAGGAGCG
5302288_2as_11600	chr2A	75.6401	T/C	5302288_2as_11600,gttttacgggggtttcacgaggtggttaacacttggcgagttatgattggTttaaggggggaggaagggccccacctacctgaaagggggggg
5198111_2as_8479	chr2A	77.2385	G/A	5198111_2as_8479,actagcttgcaaggttgcgtgttggtgcatacaagatgaagaattcgaccGgccaacaatgggagaggtggttcagattcttgagggacaggttgaaacca
IWB8937	chr2A	77.335	T/C	IWB8937,CGGCCGGCGACTGTCGTCCGTACAGCAATTTCGTGGTGACAAAGAAGTCC[A/G]TGCAGATTCAACAAGCATTGCTGGCCGATGCTTACCGTCCACCAATATTT
IWB41359	chr2A	77.5323	A/G	IWB41359,CCAAATCAGAAGTCTCTGCTTTCTTCGGCGCCTCGGTAGGAGCGGAGGCT[A/G]tgatgctgctcattatggactccacaatcttgagagggtttggaggcccg
5243092_2as_1173	chr2A	77.7436	C/T	5243092_2as_1173,catggtttttggccgatggtctccaaaggtggtcgatggctgagtgcagcCctaatccatttggggcctttgggagtatcagtgagatgcaatttatggac
5223530_2as_3325	chr2A	79.9227	A/G	5223530_2as_3325,tacacgtactcgcgggtgtgcgaggcgttccgctctaactgaaccggagcAaggcgttggtttctaactgaatccgagtgtttgcactgcaggctacgcgt
5234174_2as_16298	chr2A	80.2351	A/T	5234174_2as_16298,aatgtcggcaagctatcaaaggtgagtactcttgtaggtggacatgaattAggggggagggggtggtagtggagcaatggcgaccatcgatggaacgaaga
IWB55668	chr2A	78.8439	T/C	IWB55668,TGCAGCAACCTCATCCGAGTGTGATTTTGTAATGCTTTTGTAATGTAATG[T/C]ATGTACGTAACGATTTAAGGGTTTGACACTTGTTTTGAGAGCATCTCTGA
IWB6749	chr2A	79.7485	T/C	IWB6749,TATTGATACCAATGCAACAGACAAGACACTGTAATACCATCAATCATCCA[A/G]GGTATTTCAAAGGTCCAGACTGATCAATTCAAGGGTACGGAAAATGGACC
IWB11079	chr2A	79.7504	T/C	IWB11079,catatgatgaattcgcaggaggcgtgtagagctgggaacccaaggtactt[A/G]CTTGGTGATATTGCTCTGGGTTTTTGAGACTCGGTACGTTTGCAGGAGTA
5251641_2as_536	chr2A	90.6564	G/A	5251641_2as_536,gggagcaacacgcgaatgatgggatacgacaagactcatatctattatagGtttcacacgcgagtcgcataattgagaggtataaccacataatatagcaa
5244712_2as_3288	chr2A	104.782	A/G	5244712_2as_3288,tgccaaagtgccaatgtgcttcgttgcctccctgccatgcctgtctcacaAtcacagctagctccgatttgttgaagcttcgtgatgactgcagttgaaaa
IWA7248	chr2A	104.876	T/C	IWA7248,TCACCCGCATAACTTTCGTTGCAGAAATGTTGAGATTGCCTTGTGGAACTCGGAAATGATTCAAACTTTCCTTCTTAGAAACTTAGTGGTGTAGAGCTTT[T/C]GTTGGTTCAGAATCTTTTGGCTGTCGGTTCTAAAATTAAACTTATGTGTGTCGGTTTTGCTTGGTTAGTGACCACCGAGCAGAAGTGAACTCTTGAGGCT
5255851_2as_898	chr2A	111.004	G/T	5255851_2as_898,ttgaactagcaccacggcgcaagcggaaacagacatcagggataatgcttGacaaattaacaaaatctaaaggaggaagaatggagatccattttgaggca
5303371_2as_3312	chr2A	107.318	G/C	5303371_2as_3312,ggagtgcgtttttcgcaggcgagtgcttcaactgatcattgttacaggttGatgcatgcatgcatgcatggagttaattatagaaaccataagttattttt
5279246_2as_493	chr2A	107.441	T/C	5279246_2as_493,ttggccaccaacttgagcgcatagacgaattgtggacggtgtttcctcccTagagatcgcttgctacgataaggagcagcattccggttcctgacccgcag
5288542_2as_6949	chr3A	734.908	G/A	5288542_2as_6949,cgtcaaacagttggtgtgcactgtttctgttcaaattcagaaaattcagtGtttcagttcagagacagtctcgttttcttcagaaccgtgacgtcaatctt
5271817_2as_2133	chr2A	107.433	G/A	5271817_2as_2133,cgatgtcgagcactccgtcatatgcatccagtggaaggactcacagatccGtgtggaaggtgtgtccaggtacatcccactctaatccacgcacaatttga
IWA5585	chr2A	115.421	A/G	IWA5585,AGGTAGTCTGGTCAGTAGGCATCGTGGAGAAAGTTATACTGAGGTGGAGGAGAAAGGGAAGGGGCTTGCGTGGTTTCCAACCTGACAAACAACTTGAAGG[A/G]CCGTCCTCGCAGATCCAACCTGCAGAAGGTGGATCTGCAGAAGGTGAAGATGAATACGACTTCTTGAAGGATGGCAGGAAGCAGGCTGAAGGCAGACTAC
IWA7705	chr2A	115.42	A/G	IWA7705,ATGATTCCGAGACCCAACATATGGAGGCAGCAGATCCCCATATTACTGGTATCAATGAAATGCATTTACATATCCGTCTTGAGAAGTTGCTTTCCCTGGG[A/G]CCAGATGACTATGAGAAGTATGTTATGAGTGGTGGAAATGAGAAGTCCGAGTTAATCAGCACTATTGGTTCCCTGATGCTTGATGATAAATTTACAAACC
5252847_2as_3757	chr2A	157.114	T/C	5252847_2as_3757,ggagacggaccggtcggcgtcttgctccggcagcggcaggtcatccgcgcTggcgaactgcagctgggacgctacctggtcccgcagcctcgtccggctct
IWB45502	chr2A	117.181	T/G	IWB45502,GTGCTGGATGTGCCATGCTTCAGCTTCAGGAATGATGACACAACACCAGG[T/G]TCATCACCCTCGAACAACAACAGTAACAGCAACGATCAGGCCTCCACTCC
2715434_2as_1202	chr2A	163.468	C/T	2715434_2as_1202,atggaaacccatacaaaccgcggcccaacgcgtcgacataaacggatgagCgtttgttttttatccgtccgcgaccatttcaggcctaattttgaatgaga
5309587_2as_858	chr2A	156.235	C/T	5309587_2as_858,atctttaatatgttgtgactgcagatggagctgccactttggaaaccctaCgggcggagcatgcccgagccaaagaacaagcgaggattagtaatgcggcc
5217099_2as_2225	chr2A	153.71	T/C	5217099_2as_2225,cgcaacgctcccgccgtcagctgatccggacatgcatatggcacgggatcTggacgatggcgacggtccatttaccagggtcgataagtacttcgacgaac
5191686_2as_3520	chr2A	118.651	C/G	5191686_2as_3520,tttcaaagtactgcagagttatattacaccagttgttgctgcggttctaaCtaaatataaaaactgtcttggtcatgaacctacagcggtgatgagaaacg
5188073_2as_6367	chr7D	258.154	C/T	5188073_2as_6367,atggacggcccaaagaatgtcatgcagctgcgtctccagccctcctaggaCgaaaagcccatttttgtcatgattttttgtcatagaagtaggagcccacc
5193977_2as_1021	chr2A	128.335	G/A	5193977_2as_1021,ggtcgcattttcccgcacaagcgccttgatcttgaagctattgctggtctGccctgtctagaggaagtgttggattgcttcaaacaagtgggtctgctgca
5307952_2as_3389	chr2A	165	A/G	5307952_2as_3389,atcgtcaagatagcggcgccggtgctggtgctggtggtgctgctcacggcAgcggcggtctccatggcgcccggcggccctgcccggctccacgcgctctt
IWA6514	chr6B	182.64	T/C	IWA6514,CTCGATACGGTGCTCAGTCTCTGCAACTGCAACTTGATGCCTTGCATGAAGCTGCCAGCTATTGAGGCCCTCTCTTAATTACCCAGTTCTGAGTGGAGTC[A/G]GTTGGGGTCGTCTATAAATTTTCTTGTGATGTGCTTGCAAACCAAGACTTTGTTGAGGCTTTTCTGCGGGGTCAGGGGAGACACCAGTGATCAAGCGGCA
5289209_2as_2232	chr1A	515.901	C/T	5289209_2as_2232,ctctgcagcgcgccatcgatcatgttgtgcggcgagctgcagcctgtcggCgctgacattcctatcttgattcgcggtgctcaagcaccatgcgccaaagg
IWA5586	chr2A	115.422	A/G	IWA5586,TGACGTTGATGGGCTTTTACTAGACCAGTTAGGCTGTGACTTGTTCGTTTTACCAGACTAGTTGTAAATTCTTGTGCTAGATGTTCACTGCTCACCATTT[A/G]ACTCAATATATAGCTAATACTGTAATACATGGGACATATATAGTTCTTCTATTAGTCACTTTATGGTTGGTTTATGACAT
5205267_2as_672	chr2A	156.921	C/T	5205267_2as_672,gcccatagcatcaatgggccttctacgtgcctgatacgtctccgtcgtatCtacttttccaaacacttttgcccttgttttggactctaacttgcatgatt
5228114_2as_10484	chr2A	115.436	A/T	5228114_2as_10484,cgtggagagagtgcgaatctgaattgccatatcaagttcggctactgttgAtcagcttggggagttccaaaggtggacaagtaaaagtaactagtggttgg
IWA1597	chr2A	117.391	T/C	IWA1597,GGGAAGAGCATTCAGAAGAATTGTACAAGCAATGTCCTCATAGGCGAGCTACATACGAGTTGGCCTGTGTCACATATCTCACCCACCTGTATGGATTGTA[T/C]GTTTTGGATTTCTTCGCTATCTGAAGATATCTGACCTGTAACTTTGAAGCATTGTACATAGGTATAGTGAAGTTCATGTTTACTGGTCCGGCTTCCTTTG
5228942_2as_254	chr2A	136.181	G/A	5228942_2as_254,ctggagaggtgtacctccgtgctgctcaaaatggtctagccaaggccacaGactagtatgtaaaggatgtatggctaagtaaatccgacaattatatgtat
IWB21864	chr2A	118.447	T/C	IWB21864,ACTTAGCAAGCAAGGCCAAGACTGCACACCGAGGTCAACATGACACGACA[T/C]GACGCTGCCTGCGCTAGAACCCGCCTGGTTTTGCCACTAATCTGAATATA
5245234_2as_1169	chr2A	132.263	G/A	5245234_2as_1169,aactagttttgatgaaaatatgggcatttttggccgcggcggacaggatgGggcaaagggatggggccgcacgctgggcgcacggccatcgcatcccagga
5217707_2as_7597	chr2A	157.343	C/T	5217707_2as_7597,agttacaaatatgagcaaccaaactagtatcaaatacctaggtgctactaCgagcattagtaaggaacacatcaataacatgtatatcaagtatacctttg
5309922_2as_1588	chr3A	535.122	G/A	5309922_2as_1588,ctgattgaggataaacctcccgagatacaaccaaagcgagcgtctgcggcGcttctctaagtcacgctgcagcaaagacagcaacaccggcacaggagaag
IWA2758	chr2A	165.848	A/G	IWA2758,CTCTCTTCAGGTGTGCCATTTTCCGTGCTTTGTACTTGGCCATCTTCACTTCATGCTTTATGTCGAACCCCTTTGACTGATGATCGCTTTCATAATTCTC[A/G]GTTGGGCACGACCGCTCCTGGAAAGAACTGAAGCAAAGCCGATCAGAAAGACCTCTTCTACCCATCTTTGGGAACCCATTCAGGCGTATGGGTTCCTTGT
IWA534	chr2A	165.849	A/G	IWA534,TGATCTCTGTAAGAAGTGCCTCTTGGATCTCTTTAGCCATTTGCAGCTCTTGTGATTGTG[A/G]TGTGTGGCTAGTTGGAAATTGTTTTACTGATGTCATCTAGTGGTTTGGTTGGTAGGGTAC
5256611_2as_2643	chr5A	45.33	C/T	5256611_2as_2643,gaactgcagcgaaagctagatattgcggaggatgacgttgcgttgatcaaCaggcgtcttgacgactcgcaaggtatgtatttcgagcattctttacatca
IWB1773	chr2A	165.924	T/C	IWB1773,ACCGGCGGACGATAGAGTGGAATCCCAAGAAGAATCGGTACCTGTTCGCC[A/G]TCTGTCTCTCTGGGCAAATGTCGAACCACTTGATTTGCTTGGAGAAGCAC
IWB49580	chr2A	166.255	T/C	IWB49580,CCGGGGTGGTGCTTCAACTTGTGTGTCAGGTGGTCGGTGTACTCTGGCTT[A/G]CCGTTCATCACTTCGCAGAACACAGCCGACAAAACTTCAGCAAGGACACC
5260515_2as_1908	chr3D	135.295	C/T	5260515_2as_1908,acaactaataaaaatatctacaacatcacacacagttgttttttaggaacCgtttgtgatgaaaatatctgggtctatttaagtctccctccttaagcttc
5250709_2as_13910	chr2A	166.094	G/A	5250709_2as_13910,tctaaaccagagaagatctgcagtatagaactaacatatcaccagcaaacGggcaaacttgaggcaagaacggaacatgcaactcctcatctgatacgtag
5271295_2as_1041	chr2A	176.208	C/A	5271295_2as_1041,cgctgttgccgcattgatggaacctaaaaagtccccagctgataacatttCtttcaaagaatgataggtaccatatagcgtgtggcatggctgcagatcta
5309922_2as_1539	chr3A	356.602	T/C	5309922_2as_1539,atacatggtggatgcaccaaaagagaatagcggcgatgacaaggaagatcTgattgaggataaacctcccgagatacaaccaaagcgagcgtctgcggcgc
5219874_2as_433	chr2A	201.847	G/A	5219874_2as_433,gagcgcgacctctagatgggcattcttcgtggcgtcggcgggcagtcacaGggccaccagtgcttgaaagaggttccgttcatggaggccgattagggtag
5192070_2as_931	chr4A	8.79898	C/T	5192070_2as_931,ctctccggattcatctgcaaatctgttgttagatctgcagccatgccgcaCgttatatggtaaccatcattctttaaagtaaatgttaccagcaggtgagt
IWA2262	chr2A	197.559	A/G	IWA2262,TCGCGAGGGAGACATCTGTGCATTTCGTTTCAGGATAACTTCAAAGCGCAGCCTAGTCCTCACCGTGCACTGCCTCTAGATGCACCATCGAAGATGATGC[A/G]GCCTCTGTGTCAATATAATTTAGCACTAAGTACTCTTAATTATGTTATATCCTGTGATAACCTATCGGTTGCTTTTGGGTCCTCTTATCACATGCTTTTC
IWA3842	chr2A	195.82	T/C	IWA3842,agactggataatttttccatcctcaatgtaattccagagctcttgaagtacattatttgttttttctgcaagcagtctagttgtgtccaagaagaccttc[A/G]TCTCAGGTAGACACAGCAGATGAATAAGCTTGTAGATATAATCCAGATGACTCTGGTTGTGAGAAAGATTGTCCTCCAGATTGTCCTCCAGATACTTATG
5262176_2as_878	chr2A	224.048	G/A	5262176_2as_878,cgcaatgtcctggcatctggacctgcaactggatgctttgatgggccagcGggccggttcggagtagcacttgcaggagcaagccggccggatcgcctccc
5233620_2as_2652	chr2A	238.159	G/T	5233620_2as_2652,ttgctcatgaactgcgaaagaattcgttagggagttttgccaggagatttGtcactcgcccaagccttgcctcagcgccttgtatcgcggtacctgtgggg
5292292_2as_3485	chr7A	510.37	C/T	5292292_2as_3485,aaggtccatctacggaaccaaaataaagacaaccccaaatgcataatgtcCccgaacgcccaaactgggctccactactgatcgtctggaaaggaaacgta
5297217_2as_983	chr5A	429.54	C/T	5297217_2as_983,agaaaaactcctgtagtttatttatcaaagacaagagcgttataattttcCagtgattattagtgtttttgtttgtaagaaatcccctagtgggtggctta
5248068_2as_8524	chr2A	243.461	C/T	5248068_2as_8524,cttgtctaattcgacctcggccatgcgcaactcctcctctcgaggctcctCgatctccactgcctcctgcatctccagctcctgctcagggttctcatgag
5280197_2as_1328	chr3A	692.862	C/T	5280197_2as_1328,actgctttcttcaaggttcaggggtccaggcatatagctcactgtccataCtgtcccaatgcaacagcttcagcttcgcctcctagtcgtctgcgccggat
5221022_2as_249	chr2A	245.208	G/A	5221022_2as_249,tatgctagtgcttgctgcagctccacctcgctaccctttcctacccataaGcttaaatagtctacatctcgcgggtgtgagatagctgagtcctcgtgact
5212907_2as_10487	chr2A	264.725	T/G	5212907_2as_10487,tcatggccaagctcgtctttggtaattatatatgtgtgtatatatatataTagagagagagagagaaagagagagaatattccattttcattgcctttcgg
5201704_2as_683	chr4A	499.737	G/A	5201704_2as_683,tcgtcggctgtaaagtttgtgccgttgtcagtgatgatgctgtgggggaaGccataatggtgtacaaccccagatatgaagtctatcaccggtctggattc
5198355_2as_977	chr2A	270.687	G/A	5198355_2as_977,ctcgctctgtgcagcgaggtactagcaggcgctgcagtgttaccactgccGcagactttgctcccagagcctcgaggtgggagacctcgtcctacggcgag
5186492_2as_1359	chr5D	373.145	C/T	5186492_2as_1359,ttaacatgtttgcttttttagtggctatttgcttatgtatgtaactagttCggtgggatacaatgatttgagtctccttcctcacaagatattccccttct
5268857_2as_7989	chr2A	271.026	C/A	5268857_2as_7989,gcggcccatcttcgtcaacaaggcatcgaagaccctcgcgaggggccaagCctcgcgaggcggacgacacaagacctcctctggagtggcctagttgggca
5269127_2as_2496	chr2A	278.689	G/T	5269127_2as_2496,aaggaggagaggagtagcatgctcctccgttatgtgcgggagttcacggaGcttgaaaatctgcaggcatccaccacaaagatgcttgaggcatcagcggc
5301139_2as_737	chr6B	232.184	T/A	5301139_2as_737,tggtgacgtgggccataagccacacagctatgttagtaaaaggtttgtaaTgacaagacttgacttcggccaaggagttggaaagggggattcctgcagcc
5307967_2as_2430	chr2A	278.769	T/A	5307967_2as_2430,cggtagatcagcctgatccgcttacacggtcggtgctacctcttgagcacTgcattggttttcccttgaagaggaaagggtgatgcagcaaagtagcgtaa
5187086_2as_1760	chr2A	279.882	G/A	5187086_2as_1760,ggacgattggggatctagcattttgggttttcttcttttattttggttccGtagtcagatctttgattgtagttggatgatgtatgaattatttatgtatt
IWB26940	chr2A	278.92	T/G	IWB26940,GATAATGCTCAGTGGGAGGACAGACAATTGTTGAGGTCTGGAGCTGTTAG[A/C]GGAACGGAGGTGCAGACAGAATTTGATGATGAGGACGAGCGTAAAGTAAT
6371663_2al_13125	chr2A	347.877	A/T	6371663_2al_13125,tttgattaaactatctaaagcaaattaaaccgaacactaaccgatctactAaagaaaaaccgtaccccttcgtgatttttaatctagtgcatagatggaag
5194612_2as_2528	chr2A	310.348	A/G	5194612_2as_2528,aaataaatggagagcggcttgccatctgtcaagatctttgtgtgcttgggAggtcgcttaggggtgctgcacggagagcttgaccgacgatgaaagctcct
5203602_2as_517	chr2A	323.968	C/G	5203602_2as_517,agatgcgcaacaacttcatcggcagcttccagggtactcgcgactgccccCcagtcgcgagcgacttgcgccgcatcaagcaacaaccaggagagaccctg
5284250_2as_11238	chr2A	291.639	G/A	5284250_2as_11238,tagcaacgctataagaggggctgagcaaagtggtaacatagccaaacaacGgtttgctggacggtgaaaaaggttagaggttgtttcatgtcatattggga
5207781_2as_8120	chr2A	292.36	G/C	5207781_2as_8120,ccgtcagaaaatgcggagatgatggcctcattcgtgaccttggggatcttGaggcgggtgttgttgaagcattggatgtacttctggagggtctctcctgc
5281414_2as_2842	chr5D	506.758	C/T	5281414_2as_2842,tacaagatgcgcatgttgcctccgtacgtcgtgtgctgcctaggtttatgCgcaatatatttgggtgatggcaggaaaacagtgaggaaatggcgggaaat
IWB45113	chr2D	229.639	T/C	IWB45113,tgcacttgaagaagcgatgaaggcaggctatgaagacttcaagaggattc[A/G]CACCGACCCGGATTTAGCAAACTTGAGGAACTCGGAGGAGTTCGCCACCC
5279925_2as_2805	chr4A	500.391	C/T	5279925_2as_2805,ttgaacttaggcgaaacggattcacagctgagccacccactagggcatttCagaagcagaagtaaacaatcgagaaattttttagaagagtgtaaaattct
5254050_2as_3413	chr2A	296.403	G/A	5254050_2as_3413,gcagccgatagggcagctgtagcagcggagacggctgcacctgctgctgcGacagcggctgcaaacactgagagtgctcgagctgtcgtctacgccgctga
5283697_2as_2038	chr2A	332.438	C/T	5283697_2as_2038,atgaattcccaatcaacccacttcatctcatagactataggtttcttatcCagcagaatggtttcatagaaatcatgttgttccttggtctggaacctata
5290452_2as_860	chr2A	334.764	C/T	5290452_2as_860,cgggtgttctatctaaaacttttgcgatcaagagctgcaaaaatcctgctCgtcacattttctcttggcttctggggaagctatcggtttgcatacgggtg
5260857_2as_7284	chr2A	309.989	G/A	5260857_2as_7284,gactacaatgtcctcaagatgccaggaagcggctgaatcatcacggtcctGtgcgaagagagagacgcggtgtgctccctcgagcgtgccttccaagctgc
5240836_2as_2972	chr1A	519.946	G/A	5240836_2as_2972,taatggagccaaaggaaccattgttccacagccgaccgatccccccggacGtcttcaaggtttcagtggccagtgtcaaactgggccacgagaatttggct
IWB10151	chr2A	319.046	T/C	IWB10151,TCGTCGGCCTCAACACAGACTACGTGTTCATGGACTCATTGATGCTTGTC[A/G]ACTCACCTGATGCTTGTCGACTGACAAGGCTATGATGAACATGATCCAGG
6432875_2al_3023	chr2A	351.623	A/G	6432875_2al_3023,gactccggccacacctttcactccccttgaacaccctctcgactcctcacAcgtttgacatctcggggtaatctgcagtgccccaaacgacgccgccaccg
6438559_2al_7281	chr1D	105.624	T/C	6438559_2al_7281,caccgtttcccgccatttcctcacatgtttcccgccacccagcgatactgTgcataaacctaggcggcgcacgacgcacggaggcgacaaccgcagcctat
6335019_2al_4348	chr2A	370.93	C/A	6335019_2al_4348,gtctattccaacaactctaaagaaagtcataatatattatcagcctctgtCtgcaccggatggttcgatgggcaggcgcacaagttgccgccactgcagtt
6382432_2al_2141	chr2A	417.496	G/A	6382432_2al_2141,aaaaataggaggagtggatctggttggttggttgagacgaggaggatgcgGcagcgaccgatggggatggatcccgagggggatttggagtgtggcggcgg
6379604_2al_2752	chr1B	454.546	G/A	6379604_2al_2752,tgggctggtgagaaaagtcatggagggcagtgcctcgttgcttgggaaacGgtttgcaggccgacgagctttggtggtctgggagtaaaaattttggctgt
IWA5092	chr2A	411.125	T/C	IWA5092,TCCCAGAAATGGAAAGGGACCAGATTGTCCTGAGGTAAACATAGCTGAAAATTTGGTGGAGGGAAAGAATGAGAATAACGGCAACTCTCATAAGCCTAAG[T/C]GGAAGAAACGGAGAAGGAAGAAGAGGGCTCAAGTAGCTGTTACTGAGGCACCTGCGGTGGGTGATGTCAGCTCAGATGAAAGGAACGATGTGTGTAGAAC
IWB37169	chr2A	410.873	T/C	IWB37169,ATATTGTTGGATCCTTTTGGTTGCAAAACACTAGTTTCTAAGTAGTTAAT[A/G]ACTAGCTTTTGGCTATGCACAACTGATGTCTAAGTAATGGCTAATGGTGG
6439324_2al_5900	chr2A	411.905	G/A	6439324_2al_5900,cagtagctgctgcagccgtctcggctactgcagctgccctatcggctgccGcagatgccctctcggcagatgtggccgcgctcaatgcggatgcggcgaca
6398277_2al_5144	chr2A	425.593	C/T	6398277_2al_5144,gtaatatgataataaaaagggagataattaaagttggcttacactcgccaCgtcaaataagtacataaataacattagatcatccaaacactcatggcccg
6357002_2al_482	chr2A	409.25	A/C	6357002_2al_482,aatacaggtttaagaggatgagtttggctgcagatttgagcatcccagagActcgttcatctttctatgatggtgagcctatgccttggaagatggatggc
6334230_2al_9269	chr5D	86.0528	T/C	6334230_2al_9269,cgaatcgaagtaagaacttctccgcggggaacgacgtacgacaatccctgTggcacattaaccacatagagtgggtatcctggattttttaggcgacgagg
6357468_2al_291	chr2A	463.836	C/T	6357468_2al_291,cccgtttgatctgccgtgccccctagcgccaaaccgaacatgaccgaactCcgtccgccgcctagctcctcgccgccgcctactccggccataccagcctt
6437571_2al_10956	chr3D	558.489	G/A	6437571_2al_10956,tctattaaacaaaaattaaaaaatactttgctgcagtttattttatttgcGatctatttattcaatctattacaactttctcccgtccatgcaccatttct
6371029_2al_3782	chr2A	455.864	T/C	6371029_2al_3782,gggcgctcaggaggtcgcttagggtgctacgtggaaagctcgaccgacgaTgaaagctcctcctcaagcgaaagcgacgaggaggatagtgacggtgatga
6389023_2al_704	chr2A	462.823	G/T	6389023_2al_704,gttgttgactgcctcgatgcccaactcgtagagctgcaggaagtccgtggGgttgagggtgccatcgtagcgcggaggcggatccggcttgaacttgcctg
6365614_2al_593	chr2A	440.294	A/G	6365614_2al_593,accttgtttgtatctggttgatgtaatgctttcttcatgtatttgtgtgaAgtggcaattgtaagccaactatgtatctcttttcccttatgtattacatg
6348801_2al_2314	chr2A	487.903	G/A	6348801_2al_2314,cgccgttaaaattctttagacggagcaggcccgggccaaggagcaggcccGgtttagtaatgcggctgccaaaatggcatcgactgagttaaaagccaaac
6400453_2al_2938	chr2A	489.635	C/T	6400453_2al_2938,caggttctcaggagtatctcacaaatgagtccatcttaggtgagagatgaCtcatccagccatacgatattattgaccatttagtagcagttgaccaacag
6406524_2al_10041	chr2A	471.213	G/A	6406524_2al_10041,gggcatgggcataagcgtacgttgtacttgtgacacagctccatcgagtgGgtcatggacaagagcactaggtgctgtgcacgacctgcacctcgtcgtcc
6371199_2al_809	chr2A	463.839	C/T	6371199_2al_809,tcgaccttccttctatgctaagtttccattaattgatggcgttttatgaaCacgccaccatttcccaccatttcctcacctatttcccgccacccaacgat
6375237_2al_4914	chr2A	497.944	G/A	6375237_2al_4914,tgcttcacgggactgtcatgcttttaatggtatactgcagtatggacagtGtgtcgccgcctagccttatgcccactaacactggcaccaggaaaccgatg
6347650_2al_337	chr5B	255.934	C/A	6347650_2al_337,taaataaaatcctaccgagtggtaagccagacttccactcggaggcttagCtgcagtcctagtactcgcctaagttatcaaaatcctactgagtggtaagc
IWB32405	chr2A	501.85	A/G	IWB32405,ATTACAACTGGTATGGCTTTTGCAGTATTTCAAGG[T/C]GGCTTTTTCATTGTAAGTAAGCTGTACATGTTTCCTGCAAATGAAAGTCA
IWB39681	chr2A	498.044	A/G	IWB39681,AGGTTGAAGATGTTCATCGAAGATGAGAATGCATTTGCAGTGGAGAAACC[A/G]GAAAAAGAGGATACTGACTCTCCAAGCGGGGTTTCGGAAGGTCAGACGAA
IWA5272	chr2A	498.105	A/G	IWA5272,ttgaaaatcatgacacagggtcaactcagggccattggccatttccatctgaccatgtcatggagggatatgcttatatactcacgcaccctggaatccc[T/C]ACAGTGTTCTACGATCATTTCTTTGATTGGGGAGATTCTTTCCACGATGAAATAGCAAAACTGATGGAGATTAGGAAATCCCAAGACATACATAGTCGTT
IWA7429	chr2A	500.534	A/G	IWA7429,GTGTCTTCGTCCTCAGAGCTGATGCTGTGATCAGTGTTGCCCTCATAAAACAGGTCATCCACCATCTTCTCTACGGAAGTGTTGCACCAATAAAGGTATA[A/G]TATTGCTGACAAACTTGGCTTTTGAGGTTCTGATGCTTACTCAAATGCCATGCTGAATATAGTTGCTTTTATACTTGAAAGGAAATGCAAACCAGACCTG
IWA2195	chr2A	500.03	A/G	IWA2195,ATGCCCCTCATACAAAGAGTTGCACGCCTTGAGCTGCTTCACTATCTCTTTCCGAACATGCTTGTGATACTCAGGTGATCGATATAGCTGGTCTGAGAGT[A/G]CACGGAACTGACAATTGCCATCACCTGATACCCTCACTTCAAACAAGCCATATGCATTTAACCTGTCATGAAGACGATGATGATCCATGGTGGCATCACT
IWA5306	chr2A	503.005	T/C	IWA5306,TTATGCCTTCCATGTTTCACAAAAGTCGCCAGAAAAGACAGTTGAGAATATGAAAGGAGTGAAGTGTAAAAGGATAACAAGATGCATTGGTTCTGTCGGG[T/C]TGTATGTTCCAGGGGGCACTGCAGTCTTGCCTTCAACTGCATTGATGCTTGCTGTGCCTGCACAGATTGCTGGATGCAAAACTGTAGTTCTTGCCACACC
6401831_2al_4317	chr1D	392.809	G/A	6401831_2al_4317,gtgcagcgagctgtagcctctcgacgctgacatgcctatcttgatccacgGcgctgaagcgccatcgccaagggtctgctcaaccctggcgatgacgcgca
[truncated: 3,950 more rows]

## Sheet: TableS2
Supplementary Table S2. Pearson's Correlation between grain yield, test weight, heading date and plant height in dry, irrigated and individual environment based on the mean of each lines.
Dry Env						Irrigated Env
11BD						11EP4
Traits	HD	HT				Traits	HD	HT
HT	-0.15					HT	0.31***
YLD	-0.18	0.53***				YLD	0.11	0.35***
11EP1						11EP5
Traits	HD	HT				Traits	HD	HT	TW
HT	-0.06					HT	0.5***
YLD	-0.18	0.31***				TW	-0.44***	-0.42***
						YLD	0.12	0.05	0.13
11EP2						12UV7							jj
Traits	HD	HT				Traits	TW
HT	-0.34***					YLD	0.24**
YLD	-0.29*	0.58***
						12UVL
						Traits	TW
11EP3						YLD	0.24*
Traits	HD	HT
HT	-0.28*					13EP4
YLD	-0.17	0.68***				Traits	TW
						YLD	0.33***
12BD						13EP5
Traits	HD	HT	TW			Traits	TW
HT	-0.30***					YLD	0.11
TW	0.17	0.11
YLD	-0.14	0.15	0.26**			14EP4
						Traits	TW
12CH						YLD	0.29**
Traits	HT	TW
TW	0.23*					14EP5
YLD	0.34***	0.53***				Traits	TW
						YLD	0.18*
12EP1
Traits	HD	TW				17BI
TW	-0.30**					Traits	TW
YLD	-0.18*	-0.05				YLD	0.06
12EP2						17EI
Traits	HD	TW				Traits	HT	TW
TW	-0.30***					TW	-0.08
YLD	-0.07	-0.04				Yld	-0.23	0.29**
						17CVI
12EP3						Traits	HT
Traits	HD	TW				Yield	-0.16
TW	-0.13
YLD	-0.23**	-0.11				GY, Grain yield; HD, heading date; HT, plant height; TW, test weight
						*, **, *** significance level at 5, 1, 0.1% level
12UV5
Traits	TW
YLD	0.42***
13EP2
Traits	TW
YLD	0.35**
13EP3
Traits	TW
YLD	0.16
14CH
Traits	TW
YLD	0.04
17BD		0.01	0.11
Traits	HD
HT	0.20*
TW	-0.08
YLD	-0.41***
GY, Grain yield; HD, heading date; HT, plant height; TW, test weight
*, **, *** significance level at 5, 1, 0.1% level

## Sheet: Table S3
Supplemental Table S3. The top 20 high yield lines across various individual environments among those four mega-environments
RILs	Top20	11CH	Top20	14EP4	Top20	14EP5	Top20	17BI	Top20	17CVI	Top20	11BD	Top20	11EP5	Top20	12BD	Top20	12EP1	Top20	12EP2	Top20	17EI	Top20	12CH	Top20	12UVLD	Top20	13UVL	Top20	17BD	Top20	12UV5	Top20	12UV7	Top20	12UVL	Top20	14CH	11EP1	11EP2	11EP3	11EP4	12EP3	13EP2	13EP3	13EP4	13EP5
21	1	143.78		324.94		239.208		484.194	17	539.656		115.574		462.882		154.302		89.6442		141.628		578.294		240.906		286.964		215.276		252.182		263.62		266.983		224.615		152.797	96.4365	89.1735	137.325	303.768	130.196	63.0805	143.78	234.975	250.662
94	2	142.099		283.36		221.202		428.151		496.431		122.339		420.649		154.28		95.3605	20	169.335		596.035		265.792		272.842		215.394		274.435		204.44		212.51		180.23	3	190.564	79.5567	79.5567	173.371	349.633	156.424	74.7147	89.5098	219.987	250.958
34	3	141.225		331.49		239.902	1	613.679	2	595.138		123.805	5	502.492	18	160.423		101.615	2	192.2	3	630.211		233.068		274.073		255.052		273.88		211.165		168.798		247.48	15	178.255	76.934	73.6387	127.102	397.179	179.826	55.8848	115.535	253.995	245.432
99	4	135.643		314.097		231.084		486.517		530.669		111.083		414.663		149.823		104.439		93.4775		579.547		235.364		316.164		218.182		254.395		289.847		273.035		215.873		171.426	74.9165	72.2938	181.239	289.915	144.52	58.7092	79.1532	202.282	228.943
122	5	127.708		319.645		232.417		480.348		449.761	1	138.8		360.527	16	161.579		86.349		131.608		586.81	11	281.32		297.531		225.447	12	286.602		217.217		252.188		252.86	20	174.675	101.01	64.6945	276.666	414.058	239.41	76.5978	74.7147	222.276	240.039
84	6	126.834		287.953		218.678		483.665		528.419		110.429		368.127		150.499		95.3605		109.685	15	605.5		255.938		283.796		216.52		270.325		281.778		193.007		199.06		162.638	67.3845	25.0843	102.691	367.79	145.462	63.753	81.9777	221.938	229.301
85	7	126.632		279.189		185.053		424.134		411.016		104.368		357.568		153.445	17	112.576		146.403		579.492		251.251		294.403		216.863	15	285.655		224.615		179.558		209.82	10	179.933	81.5743	71.016	97.7142	401.819	165.973	99.1937	108.003	223.975	237.654
97	8	125.556		270.724		207.354		405.784		440.968		111.111		375.389		153.286		101.077		133.088	14	605.895		265.022		265.075		193.441		259.532		184.938		275.725		159.382		167.332	93.7465	58.7765	192.806	324.548	168.327	93.881	104.237	238.367	235.402
56	9	125.556		322.682		225.96		510.772		523.086	16	126.101		422.935		154.549	12	122.059		131.608		595.635		238.075		315.225		241.544		252.492	20	315.403	9	314.058		235.375		171.556	55.4813	20.1078	300.137	355.282	153.061	99.53	109.55	266.333	256.967
95	10	124.48		248.256		206.384		408.278		450.822		111.705		424.953		149.586		66.7793		152.59		562.82		258.719		316.539		232.181		240.53		260.93		242.1		230.667	2	195.415	88.1647	67.3845	209.685	330.466	147.345	57.7677	127.17	226.392	231.354
73	11	123.807		326.704		240.229		497.476		527.961		125.499		386.62		145.214		93.9483		102.085		545.933		243.292		319.745		255.684		222.817	12	336.25		203.767	17	305.315		168.133	38.3325	47.5458	173.034	373.776	171.689	71.6213	117.755	215.285	237.487
64	12	123.807	18	335.598		252.747		468.689		480.553		108.95		477.072		144.531		87.2905		138.333		554.92		240.776		299.144		218.229		259.55		293.21		217.89		209.147		158.626	78.548	44.923	128.111	381.375	122.597	64.6945	92.6033	220.508	239.272
60	13	123.807		312.238		244.994	12	542.25		527.077		108.353		406.123	5	165.952		85.811	13	174.043	6	624.71		264.938	6	353.713		254.543		265.316		260.258		232.012		294.555		148.397	50.5048	48.8907	216.612	388.638	166.915	68.4605	131.877	234.378	238.734
71	14	122.328		320.945		223.302		410.555		444.898		111.97		387.965		151.965		95.8312		113.047		564.842		254.201		279.892		214.476		232.057		188.973		173.505		243.445		163.82	53.4638	60.3905	119.503	369.808	148.824	70.6797	133.76	232.078	237.047
50	15	121.924	2	367.919	6	267.397	2	590.427	9	550.626	9	131.832	12	493.615		152.419	1	181.709		162.14		587.527		212.324		275.213		263.083		256.551		168.125		199.06		209.82		139.072	72.2938	54.4725	141.292	435.847	154.07	56.49	97.9832	219.144	241.376
115	16	118.225	19	334.978		244.677		513.595	10	550.153	18	125.649		441.429	20	160.352		86.349		163.081		587.43	5	293.598		324.803		251.866		278.294		257.567		282.45		274.38		164.765	139.678	73.975	211.299	416.009	185.072	83.1882	89.5098	234.327	242.792
46	17	118.225		311.798		233.776	3	573.575	11	548.071		118.443	1	558.646		156.997		89.6442	6	179.826		565.186		263.852		297.556	17	270.803		269.019		197.715		218.562		262.947		170.187	80.9017	69.3348	175.657	402.827	146.403	65.905	108.945	225.484	246.643
52	18	117.822	14	342.445	17	260.65	6	551.37	6	556.289		104.375	13	493.279		154.533		97.3108		155.482		548.706		211.621		315.351		260.78		266.165		261.603		291.865		195.698		127.565	76.5978	45.5955	122.462	462.546	138.333	81.6415	105.179	216.257	235.936
41	19	117.62		313.105		211.686		362.162		494.637		112.328		435.175		145.018		87.7613		120.647		589.239		243.411		299.272		236.31		266.004		199.06		240.755		209.147		139.055	39.9465	49.227	155.818	378.348	141.158	43.309	86.0127	215.986	227.853
72	20	116.746		326.945	12	261.77	10	544.972	16	542.182		123.698		454.005		159.991		85.811	10	175.052	11	617.504		253.909		312.281		266.711		256.326	3	366.512		256.895		220.58		148.768	42.5692	63.4168	114.258	407.737	150.707	145.395	134.702	219.954	243.811
104		106.86	1	391.043		227.066	8	546.868	13	547.299		103.867		397.179		157.291		67.7207		118.763		590.822		227.771		275.622		239.995		265.808		172.16		180.902		161.4		122.553	118.831	57.0953	222.867	381.375	128.313	55.8848	118.696	252.837	244.508
109		84.8022	3	359.251		227.968		423.688		449.894	13	126.945	20	478.08		157.042		110.155		113.047		569.834		251.86		241.725		223.872		273.524		160.727		177.54		223.942		166.087	93.7465	73.3025	154.204	419.64	176.464	88.8373	113.316	236.202	242.972
82		94.2173	4	356.654		250.512		470.956		525.898		108.799		432.216		156.167		89.6442	16	172.16		592.576		248.457		333.39		246.436		262.369		221.925		241.428		183.593		136.62	42.5692	78.279	203.028	395.901	167.385	95.764	115.872	207.411	237.035
74		106.255	5	350.483	20	257.608		501.041		470.993		119.867		446.069		157.808		89.1735		138.804		600.783	9	281.853		322.857	20	267.956		271.814		304.642		232.012		226.633	14	178.279	49.227	22.4615	172.362	362.209	114.46	59.0455	103.632	225.255	228.146
26		104.103	6	349.132	9	265.489		505.058		498.073		96.4586		305.719		156.48		61.063		126.363		601.579		251.041		310.202		234.437		238.848	6	355.752		236.047		270.345		148.785	77.6065	72.2938	71.9575	435.847	106.86	47.4113	81.6415	223.938	244.363
40		97.647	7	346.924		230.507		453.37		466.143		115.044		433.493		152.434		92.0652		158.306		568.352		272.872		326.819		239.791		272.428		254.205		265.637		229.995		167.887	46.2007	80.5655	116.208	343.715	151.649	70.0072	103.296	235.924	240.526
75		108.407	8	345.109	16	260.769	7	551.284	8	551.904	2	138.135		458.578	2	169.193	7	128.313	18	170.277	9	619.219		239.045		305.159		235.274	4	297.183		303.298		225.96		289.175		164.586	56.1538	21.1165	125.825	374.381	195.563	71.285	150.102	225.423	245.754
78		91.3928	9	344.987		227.422		494.695		461.069		123.79		402.827		150.676		82.045	5	185.072		570.345		261.213		335.811		235.238	17	282.763		283.123	7	317.42		276.397		160.42	53.1275	50.841	174.312	352.592	149.295	84.8022	172.698	221.005	229.485
25		87.156	10	344.869	10	264.443		362.226		487.766		113.182		442.774		155.585		80.0948		159.315		587.043		239.532		285.997		234.405		242.886		312.712		291.192		290.52	17	176.99	48.8907	51.8497	100.404	376.062	125.421	49.6305	90.7202	225.549	233.227
103		112.038	11	344.26		214.44		441.046	14	545.34	14	126.68		399.801	12	164.119	18	112.106	3	187.426		587.567		261.244		336.673		266.954	1	299.098		263.62		254.877		180.902		163.292	82.1795	61.3993	200.741	382.989	196.504	84.1298	105.515	222.755	226.677
110		90.5858	12	342.681	7	267.183		474.596		514.47		120.079		233.761	11	164.21		81.1035	11	175.052		570.698		226.974		293.997		236.378		266.594		272.363		221.252		195.698		164.934	139.342	95.764	143.31	419.64	178.347	99.53	117.418	243.907	245.711
49		116.746	13	342.545		240.273		474.151		491.386		100.042	16	486.688		150.48		81.5743		124.48		586.492		218.364		336.37	13	275.353		275.021		287.158		189.645	12	314.73		169.35	94.7553	53.4638	96.1002	388.638	127.842	35.777	52.1187	248.013	241.172
62		110.29	15	341.404	11	263.213		494.181		482.191		124.13	17	485.68		152.392		91.5945		152.12	4	627.9	14	278.09		316.418	8	282.3		258.706		267.655		259.585	8	319.438		154.725	62.408	51.1773	197.446	394.556	141.628	47.4113	97.9832	210.096	227.79
101		91.3928	16	340.029		239.483		443.181		456.954		119.219		371.422	13	163.543		80.0948		139.746		599.305		228.856		312.876		250.738		249.601		256.222		279.76		244.79		164.901	131.743	71.6213	199.733	368.799	168.798	69.7382	127.506	250.618	240.957
1		75.7235	17	337.396		241.542	9	546.794		527.598		113.526	9	497.919		146.852		97.3108		158.306		543.207		225.107		282.214		204.706		253.158		295.9		196.37		241.428		151.861	72.9663	90.115	117.889	400.474	115.401	58.7092	104.237	220.499	245.349
111		93.1412	20	334.637		224.72	5	568.681		463.383		110.33		331.812		145.957		87.7613		112.576		546.665		229.16		304.736		225.716		264.39	14	328.853		219.235		207.803		148.576	136.988	85.811	202.086	389.243	73.437	73.7733	87.2905	224.796	239.035
11		62.4752		321.082	1	280.211		510.903		492.387		104.556		409.418		153.278		95.8312		152.59		580.808		224.311		322.612		231.306		270.761		265.637		268.327		285.812		150.848	43.2417	37.66	79.893	312.981	117.351	67.1827	126.228	223.755	234.193
9		88.6355		321.999	2	277.516		523.002	4	559.124		98.4959		438.134		158.924		89.1735	4	186.013	16	605.155		217.77		242.607		215.745		259.29		112.98		191.662		146.605		143.126	58.7765	66.3757	116.88	353.264	170.277	57.1625	90.115	243.025	233.554
20		114.392		299.946	3	274.127		472.594		488.582	10	131.669		464.899	3	168.772	9	126.363		166.444	8	621.035		265.431		264.851		223.762		275.582		258.24		197.715		167.452		164.416	96.1002	82.1795	116.88	341.697	173.101	72.5627	155.078	230.243	238.358
2		90.7875		322.278	4	271.467		390.411		479.502		107.123		425.289		150.457		101.077		110.155		564.205		249.648		294.062		257.153		248.59		243.445		255.55		198.387		172.536	94.7553	104.305	118.225	369.135	144.52	75.6562	91.998	221.585	238.895
23		114.796		318.487	5	268.338		516.34		513.659		123.321	10	497.583	6	165.906		104.439		154.541		597.875	6	285.752		309.258		261.366		275.865	18	316.748		256.222		249.498		163.25	37.3238	63.4168	111.904	352.256	170.277	55.5485	132.214	224.421	223.578
19		90.5858		331.849	8	266.598	4	573.429	5	557.223		96.5631		416.009		145.769		77.741		163.552		573.18		189.91		225.258		230.477		244.665		133.155		156.02		183.593		143.5	125.152	123.807	128.448	335.443	144.52	54.0017	189.04	209.065	232.367
90		79.4223		299.133	13	261.444	20	524.287		491.631		109.474		390.924		153.425		96.302		118.293		577.243		271.233		323.733		214.726		235.263		223.27		281.105		227.305		123.331	75.2527	69.671	132.751	396.506	139.275	82.583	92.6033	243.594	241.741
93		103.027		314.907	14	261.354		497.106		530.451		105.758	4	506.124		153.748		105.852		126.834		576.148		217.95		314.796		229.232		255.041		243.445		205.113		273.035		132.815	127.102	65.7032	173.034	417.353	165.973	63.0805	108.003	213.884	234.757
14		108.407		322.467	15	261.17	11	542.58		529.11	20	125.529		441.429		157.033		92.536		138.333		582.909		248.255		315.548		252.07		267.185		273.035		237.392		287.83		137.753	67.3845	53.8	168.394	353.264	145.462	68.7968	130.936	242.484	236.632
87		77.2703		329.684	18	259.333	13	539.384	1	605.915		116.021	19	483.662	4	167.606	10	125.421	19	169.335		554.308		269.722	16	339.232	12	278.791		252.855		280.433		268.327		260.93		151.632	53.4638	53.4638	98.0505	458.578	141.158	79.1532	75.6562	230.193	237.092
38		92.7377		316.818	19	257.743		460.721		454.843		120.917	18	485.007		140.952		98.723		128.313		539.548		241.039		287.401		200.821		245.327		264.965		247.48	15	310.022		151.726	45.8645	95.0915	147.883	415.672	202.691	32.011	98.5885	216.189	228.564
113		95.8985		303.644		241.503	14	538.742	15	543.096	4	137.117	6	502.156		157.725	13	121.117		164.561	18	604.767	16	276.105		314.278		257.013		262.891		189.645		282.45		291.865		163.853	100.404	72.63	134.702	488.975	195.025	55.5485	108.945	208.687	232.174
80		114.392		331.865		247.036	15	534.931		503.149		111.497		473.44		154.072		100.135		144.991		542.257		236.931		306.116		216.408		220.773	4	362.478		218.562		184.265		150.862	91.1238	67.6535	139.678	348.96	133.559	90.7202	110.492	213.512	242.904
96		98.0505		261.384		176.477	16	534.696		515.052		71.3962		372.094		148.767		87.2905		144.991	17	605.015	18	274.066		330.979	4	290.818		246.356		307.333	3	332.215		271.69		146.942	68.326	23.7392	165.771	347.683	137.325	64.022	135.979	206.857	232.636
63		81.5743		324.782		225.173	17	527.678		490.29		85.8231		385.006		151.564		92.536	14	173.101		562.216		212.029		314.825		221.949		245.839		305.315		234.703	6	324.817		147.053	52.186	41.6278	185.543	352.592	167.856	56.49	78.2118	209.709	226.951
5		82.1795		324.336		256.932	18	526.026		515.465		123.621		371.086		149.926		84.8695		150.707		572.907		229.438		313.541		194.155		266.143		254.877		201.75		217.217		163.897	79.2205	92.4688	133.088	353.601	124.009	66.5775	61.5337	213.26	240.803
91		105.583		296.714		254.98	19	524.321	18	539.643		120.709		364.159	15	162.572	8	126.834		158.306		585.245		267.369		311.795		234.025		274.275		192.335		204.44		159.382		170.114	88.1647	46.537	165.099	424.616	166.915	66.2413	95.4277	217.121	230.88
121		74.9165		309.908		226.594		512.278	3	574.668		101.264		441.429		147.234		88.232	7	177.876		577.554		255.544		312.209		237.368		258.198		207.13		225.96		217.217		141.771	41.2915	40.9552	150.909	397.851	137.325	45.5282	89.5098	227.455	228.905
83		109.685		286.251		248.505		474.66	7	552.88		112.115	15	490.656		158.91		92.0652		153.532	7	622.679		243.068		328.779		252.607		257.976		232.685		209.147		253.533		134.67	55.8175	40.2828	161.467	386.62	132.55	79.4223	96.3692	209.479	230.371
8		107.734		283.853		216.856		447.171	12	547.314	7	132.769		458.578	14	163.359	3	140.687		163.081	5	626.098		271.603	17	337.978		248.473		270.382		172.16		292.538		184.265		155.812	58.104	39.274	77.9428	289.242	183.122	65.2998	116.477	227.768	233.789
118		91.191		315.333		236.014		445.563	19	536.446	6	136.427		369.135		150.39	20	112.106		118.293		596.683		254.684		329.452		265.156		264.172		297.917	15	301.952		270.345		150.654	111.568	54.4725	233.425	402.491	170.748	62.139	65.905	229.619	237.991
58		87.156		289.596		212.938		485.322	20	533.298		68.3594		424.28		153.079		97.3108		166.444		574.405		242.613		312.308		213.74		248.408		314.058		259.585		275.053		166.246	56.759	27.3708	186.551	369.135	114.46	98.9248	137.19	249.185	243.455
28		95.6967		284.993		216.467		409.489		478.332	3	137.196		464.563		159.333		100.606		156.424		560.336	1	321.907		292.115		236.674		248.214		260.258		269		227.978	5	185.944	62.408	40.619	97.7142	383.661	142.099	38.3325	143.78	244.71	243.044
29		92.7377		311.207		238.064		474.574		489.142	5	136.594		418.631		154.746		62.0045		145.933		578.023		261.154		268.038		204.675		228.635		186.282		184.265		236.047		167.701	83.5245	60.3905	61.7355	334.77	105.852	44.923	97.9832	220.123	230.394
53		96.1675		313.483		225.954		444.372		498.907	8	131.876		437.461	17	161.233	19	112.106		149.295		595.979	3	294.2	1	382.819	1	345.531	2	298.64	13	332.887	1	355.752	11	314.73	1	196.112	63.0805	59.1127	167.722	345.665	95.8312	91.998	103.901	210.603	237.392
32		98.9248		323.7		238.573		356.64		487.114	11	129.132		434.166		157.809		105.381		141.158	20	603.161	7	283.451		326.063		254.317		258.356		237.392		269.673		195.698		168.949	66.712	56.1538	68.326	340.083	177.876	60.5922	118.36	248.994	243.396
42		80.2965		296.564		214.084		374.697		498.754	12	127.079		469.136		159.706		94.419		151.178		602.811		261.381		303.928		246.018		249.089		250.842		254.877		247.48		169.688	57.0953	81.238	152.187	437.797	137.325	63.753	107.667	220.546	234.358
117		76.1942		314.785		231.587		470.489		521.695	15	126.421		379.693		160.275	11	124.95		103.498	1	647.215	10	281.461	7	353.258	2	300.125	18	282.352		314.058	8	314.73	10	316.075	13	179.084	128.111	56.759	206.995	388.302	178.818	88.5683	90.4512	238.363	244.238
57		63.9548		277.771		233.998		398.119		461.536	17	125.82		471.49		159.293		106.86		103.027		581.474		273.293	4	356.608	15	273.643		264.418		263.62		293.21		NA		168.029	58.4402	29.3882	212.308	407.737	216.007	89.7788	124.681	239.267	246.938
108		87.3577		333.504		240.532		391.943		498.847	19	125.573		477.408	9	164.581		103.027		127.842	12	617.235		257.097	5	354.137		227.429		269.527		303.298		245.463		247.48		164.764	107.331	76.2615	196.774	463.891	114.93	75.6562	84.466	234.882	233.6
88		107.936		301.96		216.027		514.03		521.557		119.194	2	528.249		158.795		108.743		150.237	13	609.982	2	294.466		336.485		263.069	10	289.155		273.035	19	295.9		285.812	9	182.229	73.975	82.1795	116.88	428.248	150.707	83.5245	105.515	233.3	241.437
37		87.156		281.545		229.526		425.767		486.782		116.801	3	512.647		152.116		86.8197		163.081		569.714		241.445		293.537		240.859		263.181		253.533		219.908		269.673		147.291	52.5222	54.1363	139.006	384.67	136.854	44.2505	148.824	206.737	223.94
17		90.7875		321.719		252.279		473.788		523.253		118.211	7	501.55		156.952		97.3108		150.707	19	604.449		252.25		324.736		255.757		272.724		214.528		240.755		249.498		164.501	63.4168	36.9875	156.491	377.407	185.543	98.9248	144.722	246.88	254.224
47		109.886		324.533		249.297		501.111		513.965		116.9	8	498.255		156.221	16	113.518	15	172.16		561.588		230.308		304.733		245.495		267.184		238.738		273.708		244.117		146.59	57.0953	69.671	134.029	432.821	147.815	68.7968	100.135	225.23	241.825
6		53.1947		272.552		242.293		425.213		480.882		120.905	11	494.624		155.496		95.3605		139.275		570.112		266.205		336.58		264.199		267.532		258.913		251.515		250.17		166.656	76.5978	50.5048	87.4922	367.454	173.572	102.691	92.6033	210.941	237.337
30		73.3697		242.859		187.266		464.965		401.531		116.668	14	491.934		153.863		99.6645		117.351		567.261		263.119	3	357.746	6	285.41	3	297.971		298.59	12	308.005	2	344.32	4	188.749	44.923	64.022	52.5222	310.022	130.196	103.901	106.457	245.33	246.607
43		92.0652		318.277		218.209		518.637		527.042		89.0577		440.42	1	169.923		106.86		155.953		575.137	13	278.173		323.512	18	269.616	6	292.318	19	315.403	14	304.642		287.83		173.246	85.811	64.3582	161.803	342.034	143.041	78.817	126.834	251.5	237.169
120		112.644		307.597		218.345		501.674		509.13		107.954		416.345	7	165.827		90.5858		122.059		596.029	17	275.782		300.571	3	295.388		266.663		291.865	13	305.315	16	305.315		162.461	104.641	66.0395	232.752	374.381	141.628	68.1243	82.583	218.889	243.059
61		72.9663		287.038		233.844		472.978		454.264		120.36		423.608	8	165.635		106.322		167.385		567.394		226.317		321.375		258.38		254.998		213.855		281.778		236.72		160.176	78.279	36.315	285.611	337.73	155.953	86.349	143.512	217.89	240.233
114		55.6158		286.003		214.487		444.366		482.613		93.1491		450.037	10	164.515	15	119.705		145.462		584.074		271.492		299.381	5	287.345	11	287.849		232.012		287.83	1	352.39		139.825	105.314	54.1363	150.909	432.216	174.043	134.702	110.223	224.201	238.895
27		108.138		282.154		217.452		411.974		492.295		124.417		394.556	19	160.369		79.1532		137.795		529.666	15	277.183	2	360.318		265.562		262.277	11	337.595	17	296.572	3	336.25		163.024	97.0418	54.4725	109.617	424.953	143.579	74.7147	86.349	238.025	245.874
16		109.685		250.058		246.881		452.332		531.865		119.583		364.495		151.062	2	143.579		119.234		596.334	4	293.789	12	345.378		254.974		271.777	2	379.29	16	297.917		199.06		165.64	58.7765	46.537	132.751	450.709	218.428	78.817	139.746	227.284	231.274
22		97.2435		334.31		249.678		480.971		481.371		112.229		393.883		149.956	4	139.275		158.306		547.324		262.558		292.273	7	285.139		243.375		225.96		233.358	19	298.59		149.883	76.5978	117.553	149.9	365.167	155.482	43.9815	128.448	225.602	237.678
81		87.3577		293.552		215.73		388.207		413.095		114.528		355.618		158.815	5	136.383	1	196.034		591.974		258.457		311.342		238.392		254.78	16	322.8	11	308.005		210.493	7	182.582	34.3648	60.1215	151.514	356.223	159.315	146	116.477	225.749	239.153
100		75.5217		266.033		216.784		463.795		493		117.561		428.584		152.419	6	128.784	17	170.748	10	617.818		242.582		310.76		249.795	16	284.807		270.345	18	296.572		266.983		166.043	67.6535	50.1685	188.502	371.422	133.088	65.2998	107.398	195.6	230.667
124		111.568		277.872		229.787		490.326		518.392		108.554		431.88		151.302	14	120.647	9	175.523	2	636.623	8	283.415	15	340.212		257.164	7	291.965	5	357.77	2	355.08		264.965	18	176.153	129.725	45.2593	142.974	362.209	153.532	90.115	47.7475	214.796	237.119
33		95.6967		289.381		200.779		430.5		462.176		101.174		403.433		158.004		104.439	8	176.464		525.76		259.629		329.704		267.948	14	285.827		305.315		281.105		286.485		151.678	41.6278	57.0953	76.5978	354.273	161.669	66.8465	93.2757	217.313	229.919
18		81.5743		313.969		229.674		473.657		489.775		89.4803		461.268		146.4		78.2118	12	175.052		590.907		260.861		312.758		224.281		248.151		261.603	20	295.228		201.077		160.113	51.8497	52.186	85.811	302.423	175.993	64.6945	181.777	219.388	229.549
112		92.7377		281.405		200.367		445.439		472.071		115.362		443.716		154.007		77.741		161.198		569.034	12	279.393	11	347.036		257.308		274.864	9	342.303		246.135		188.3		164.869	95.4277	68.6623	159.45	431.207	157.365	69.7382	87.8957	234.73	231.866
66		95.495		251.273		193.207		405.873		481.68		115.325		461.604		154.168		101.615		161.198		565.856	19	273.797		333.535		239.03		272.308		297.917	10	310.022		281.105	11	179.749	43.2417	54.8087	106.659	377.071	163.552	45.8645	108.609	224.763	230.072
24		69.5365		260.474		198.799		407.04		452.762		111.496		443.447		154.849		66.7793		146.403		570.628	20	273.77		304.472		228.101		268.731		256.222		256.895	9	319.438	12	179.687	67.6535	75.9252	100.673	368.799	173.572	55.5485	101.749	209.364	223.624
4		65.0307		286.911		211.601		406.509		450.779		77.4236		328.516		147.749		60.5922		117.822		590.647		245.009	8	349.495	19	269.034	13	285.829		297.245		250.842	20	297.245		172.598	68.326	85.811	124.143	449.364	125.892	90.115	124.681	222.698	212.896
76		92.0652		271.176		212.806		412.745		511.51		99.8275		407.064		142.883		105.852		132.079		590.865		259.47	9	347.936		244.666		275.686	1	391.395	6	320.11	4	331.542		144.647	38.3325	40.2828	158.172	291.192	181.709	56.221	131.272	224.345	228.239
39		94.0155		316.3		248.054		439.704		500.536		117.788		442.438		156.854		104.439		147.815		589.113		261.586	10	347.609		227.6		263.445		245.463		258.24	13	313.385		169.818	40.2828	82.1795	133.693	354.945	130.667	35.777	131.877	225.089	243.026
98		114.392		269.972		204.501		371.869		462.54		116.714		378.685		151.921		87.2905		164.561		599.795		248.16	13	344.791		266.274	20	280.875		301.28		252.86	5	330.87		163.213	70.3435	38.3325	186.551	326.566	210.291	99.8663	122.462	222.447	235.632
55		93.8137		307.59		238.912		409.134		529.852		117.896		433.493		143.294		92.536		137.795		590.62		251.779	14	341.494		248.193		264.99	17	320.11		285.14		243.445		144.196	48.5545	23.134	134.365	375.389	150.237	40.8208	86.0127	186.332	235.128
107		79.8257		330.804		242.64		474.958		494.096		122.257		438.47		156.781		75.858		132.079		577.98		268.551	18	337.93		231.135	9	291.295		273.035		226.633	7	322.8		160.358	103.027	64.6945	219.571	438.47	142.099	67.788	76.5978	210.839	236.037
77		68.4605		289.565		181.844		358.442		402.233		107.838		399.801		146.867		77.741		101.077		543.784		233.079	19	337.247		212.188		262.205	15	325.49		277.07		266.983		171.793	45.8645	106.995	111.568	291.192	141.158	70.0072	125.892	203.865	237.591
45		109.214		301.622		240.964		372.5		461.14		123.16		437.461		148.631		81.1035		143.041		596.254		264.154	20	336.682		257.503		265.124		263.62		264.292		279.76		172.109	48.2182	68.9985	169.403	375.726	135.441	72.2265	91.0565	220.384	224.255
31		85.6093		306.441		255.043		415.261		465.852		114.095		457.972		149.728		93.4775		112.576		595.111		242.443		321.466	9	281.893		248.359		248.153	5	324.817		157.365		152.769	86.8197	56.759	109.954	388.638	128.313	73.7733	82.583	226.766	231.396
12		77.2703		261.405		183.495		399.83		382.696		117.335		391.933		142.996		73.9077		159.786		525.05		270.585		336.322	10	280.716		276.094	7	353.062		263.62	18	301.952		163.397	84.8695	62.7443	98.0505	253.869	172.16	82.2467	134.702	211.049	222.084
13		95.0915		275.577		191.87		363.578		457.794		95.923		392.538		152.149		100.606		125.421		566.305		272.821		320.351	11	280.202	19	281.608	8	349.028		241.428		278.415	8	182.235	45.2593	58.4402	101.01	246.001	175.523	108.945	106.726	213.622	226.77
54		83.928		269.699		201.838		457.142		477.547		117.439		447.078		158.531		89.6442		152.12		599.682		242.744		327.341	14	274.971	5	295.866		285.812		260.93		259.585	16	178.103	46.537	19.5025	145.26	391.26	193.613	55.5485	105.784	228.833	247.419
119		50.2357		274.531		210.316		350.116		439.577		78.0799		294.152		139.945		99.1937		130.667		543.504		248.741		313.398	16	272.397		226.108		262.275		230.667	14	312.712		165.186	109.954	52.5222	119.84	264.158	136.383	69.7382	96.3692	215.525	223.797
102		86.4835		311.231		221.627		452.821		484.443		96.7202		405.114		160.061		92.0652		120.176		569.004		259.55		256.154		222.483	8	291.802		261.603		277.07		233.358		142.569	74.9165	50.5048	191.797	324.548	110.155	63.753	95.764	254.51	237.447
106		113.316		297.18		156.587		400.497		469.748		53.1896		362.881		148.951		88.7027		158.306		592.331		267.297		315.615		244.383		274.899	10	340.958		251.515		275.053		156.799	79.5567	41.2915	142.637	330.803	177.405	64.3582	80.3637	206.324	225.763
59		112.913		279.137		209.265		477.197		483.893		114.299		477.744		156.757		82.045		144.52		595.715		261.987		334.043		228.613		264.255		189.645	4	325.49		227.305		160.078	71.016	26.093	128.111	341.361	184.063	81.0363	122.799	225.484	235.19
105		78.548		251.318		163.005		343.803		440.795		97.7576		374.717		158.661		90.115		125.421		550.324		228.287		285.031		244.933		268.155		266.983		209.82		265.637	6	184.08	104.977	60.1215	181.239	336.452	170.277	69.0658	97.9832	217.374	228.326
44		90.3167		310.897		238.618		411.73		463.026		114.327		415.672		154.449		92.0652		141.628		597.012		246.441		279.656		216.849		249.371		267.655		242.772		261.603	19	175.842	79.5567	100.068	144.924	374.717	116.813	88.232	108.945	235.18	236.599
IndEnv		2		23		24		26		27		1		7		8		10		11		28		9		16		21		25		13		14		15		22	3	4	5	6	12	17	18	19	20
ME		1		1		1		1		1		2		2		2		2		2		2		3		3		3		3		4		4		4		4

## Sheet: Table S4
		Supplementary Table S4: QTL detected by different analysis, their respecitve additive effect, LOD and PVE.
ordered by trait-additivePVE-chrom-Mb	ordered by chrom-Mb-Trait	QTL types	QTL name	Chrom	Position§ (Mb)	Trait‡‡‡	Environment‡	QTL analysis†	LOD Threshold	LOD††	LOD (A)	LOD (A*E)	PVE‡‡ (%)	PVE (A) (%)	PVE (A*E) (%)	PVE(A)-PVE(A*E)	ADD§§	25LGs	Peak position# (cM)	LeftCI	RightCI	Left SNPs	Left SNPs alleles	Left SNPs TAM 112 alleles	Left SNPs TAM 111 alleles	Left SNPs chr#_bp	Right SNPs	Right SNPs alleles	Right SNPs TAM 112 alleles	Right SNPs TAM 111 alleles	Right SNPs chr#_bp	A*E_01¶¶	A*E_02	A*E_03	A*E_04	A*E_05	A*E_06	A*E_07	A*E_08	A*E_09	A*E_10	A*E_11	A*E_12	A*E_13	A*E_14	A*E_15	A*E_16	A*E_17	A*E_18
208	21	Consistent	Qyld.tamu.1A.412	1A	411.662	YLD	AcrossME2	Within ME_ADD	6.0586	6.7827	0.4309	6.3518	8.3176	0.7743	7.5433	-6.769	-1.4181	1A	58	57.5	58.5	3975933_1al_3664	C/T	T	C	chr1A_411661876	3908649_1al_6432	G/A	G	A	chr1A_422489292	3.9002	4.4029	0.9525	1.2873	-1.7491	-8.7938	NA	NA	NA	NA	NA	NA	NA	NA	NA	NA	NA	NA
214	20	Consistent	Qyld.tamu.1A.412	1A	411.662	YLD	17EI	Ind Env-ADD	3.3165	5.2296			12.9376				-10.2223	1A	58	57.5	58.5	3975933_1al_3664	C/T	T	C	chr1A_411661876	3908649_1al_6432	G/A	G	A	chr1A_422489292	NA	NA	NA	NA	NA	NA	NA	NA	NA	NA	NA	NA	NA	NA	NA	NA	NA	NA
202	27	Consistent	Qyld.tamu.1A.586	1A	585.635	YLD	Across ME1234	Across ME-ADD	5.1908	25.2389	2.824	22.4149	21.2164	2.7999	18.4165	-15.6166	-1.9384	1A	172	171.5	172.5	3977278_1al_1171	C/T	T	C	chr1A_585634721	IWB45449	A/G	A	G	chr1A_586952175	1.4133	2.7349	-8.4295	4.2812	NA	NA	NA	NA	NA	NA	NA	NA	NA	NA	NA	NA	NA	NA
215	26	Consistent	Qyld.tamu.1A.586	1A	585.635	YLD	ME3	Ind ME_ADD	3.315	24.8961			16.7732				-11.0964	1A	172	171.5	172.5	3977278_1al_1171	C/T	T	C	chr1A_585634721	IWB45449	A/G	A	G	chr1A_586952175	NA	NA	NA	NA	NA	NA	NA	NA	NA	NA	NA	NA	NA	NA	NA	NA	NA	NA
182	29	Consistent	Qyld.tamu.1A.587	1A	586.953	YLD	Across ME1234	Across ME-ADD	5.1908	36.3334	12.0357	24.2977	35.2528	14.631	20.6218	-5.9908	4.4313	1A	174	173.5	175	IWB34513	A/T	T	A	chr1A_586953142	IWA693	T/G	G	T	chr1A_587809620	-3.9684	-3.3488	8.9959	-1.6787	NA	NA	NA	NA	NA	NA	NA	NA	NA	NA	NA	NA	NA	NA
216	28	Consistent	Qyld.tamu.1A.587	1A	586.953	YLD	ME3	Ind ME_ADD	3.315	34.8845			24.9974				13.5413	1A	174	173.5	175	IWB34513	A/T	T	A	chr1A_586953142	IWA693	T/G	G	T	chr1A_587809620	NA	NA	NA	NA	NA	NA	NA	NA	NA	NA	NA	NA	NA	NA	NA	NA	NA	NA
193	30		Qyld.tamu.1B.376	1B	376.056	YLD	AcrossME1	Within ME_ADD	5.6685	6.2025	5.5667	0.6359	5.7822	4.7882	0.9941	3.7941	6.3641	1B	67	65.5	69.5	3857505_1bl_1475	G/C	G	C	chr1B_376055687	3850458_1bl_2191	A/T	A	T	chr1B_378828312	-4.0006	-2.0219	0.4998	4.5573	0.9654	NA	NA	NA	NA	NA	NA	NA	NA	NA	NA	NA	NA	NA
186	31		Qyld.tamu.1B.556	1B	556.29	YLD	across all env	Multi Env-ADD	14.4009	14.7124	6.1104	8.6021	14.7365	7.0042	7.7323	-0.7281	2.5894	1B	85	83.5	85.5	3859439_1bl_2195	A/G	A	G	chr1B_556289586	IWA3684	A/G	A	G	chr1B_562375202	-1.7922	0.4913	-1.9937	-6.6815	1.0388	1.5073	0.2597	-1.9053	-0.4655	1.0488	2.2412	-2.6676	3.8597	-0.8225	1.5921	2.3076	-2.3799	-1.2928
195	32		Qyld.tamu.1B.573	1B	573.004	YLD	Across ME1234	Across ME-ADD	5.1908	5.2902	3.9968	1.2934	5.7301	4.4081	1.322	3.0861	2.4368	1B	91	90.5	93.5	3863280_1bl_2701	C/T	C	T	chr1B_573004304	IWB596	T/C	T	C	chr1B_581209687	2.2472	-0.5235	-0.4662	-1.2576	NA	NA	NA	NA	NA	NA	NA	NA	NA	NA	NA	NA	NA	NA
196	46	Consistent/Pleiotropic	Qyld.tamu.1D.422	1D	421.848	YLD	AcrossME3	Within ME_ADD	5.2092	6.8745	3.6938	3.1807	5.5529	4.1935	1.3594	2.8341	3.6917	1D	69	68.5	69.5	2237051_1dl_3543	T/C	C	T	chr1D_421848091	3965563_1al_2116	C/A	C	A	chr1D_425676570	3.153	-0.7711	0.2752	-2.6571	NA	NA	NA	NA	NA	NA	NA	NA	NA	NA	NA	NA	NA	NA
198	45	Consistent/Pleiotropic	Qyld.tamu.1D.422	1D	421.848	YLD	across all env	Multi Env-ADD	14.4009	16.9595	3.0913	13.8682	12.6742	3.6035	9.0707	-5.4672	1.8603	1D	69	68.5	69.5	2237051_1dl_3543	T/C	C	T	chr1D_421848091	3965563_1al_2116	C/A	C	A	chr1D_425676570	2.1382	-1.4358	-1.2811	-1.9237	5.5423	-4.8555	2.6738	-0.7377	4.9766	1.655	0.323	1.7699	-3.3573	7.0818	-1.4278	1.0442	0.7102	-2.9741
217	44	Consistent/Pleiotropic	Qyld.tamu.1D.422	1D	421.848	YLD	12CH	Ind Env-ADD	3.3165	5.5995			9.9384				6.8669	1D	69	68.5	69.5	2237051_1dl_3543	T/C	C	T	chr1D_421848091	3965563_1al_2116	C/A	C	A	chr1D_425676570	NA	NA	NA	NA	NA	NA	NA	NA	NA	NA	NA	NA	NA	NA	NA	NA	NA	NA
197	56		Qyld.tamu.2A.80	2A	79.7504	YLD	AcrossME1	Within ME_ADD	5.6685	6.4619	4.2598	2.2021	4.7939	3.6916	1.1023	2.5893	-5.596	2A	58	57.5	58.5	IWB11079	T/C	C	T	chr2A_79750432	5251641_2as_536	G/A	G	A	chr2A_90656384	5.831	-2.9997	-1.2827	-1.4481	-0.1004	NA	NA	NA	NA	NA	NA	NA	NA	NA	NA	NA	NA	NA
218	60		Qyld.tamu.2A.735	2A	734.509	YLD	13EP3	Ind Env-ADD	3.3165	4.9759			10.8452				9.6613	2A	125	121.5	125.5	6415190_2al_16820	G/T	T	G	chr2A_734509026	IWA2051	A/G	G	A	chr2A_739876905	NA	NA	NA	NA	NA	NA	NA	NA	NA	NA	NA	NA	NA	NA	NA	NA	NA	NA
211	73		Qyld.tamu.3A.10	3A	9.60366	YLD	across all env	Multi Env-ADD	14.4009	16.2085	0.1504	16.0581	16.2044	0.178	16.0265	-15.8485	-0.4156	3A	8	6.5	9.5	IWB7693	A/G	A	G	chr3A_9603661	IWB27353	A/C	A	C	chr3A_9614596	2.9979	5.5756	-3.7951	-0.3961	-6.6756	3.4679	7.6668	0.7979	-1.0516	-0.2544	0.7691	-0.5451	-7.3032	-6.0281	-8.0555	-4.9362	1.6866	1.8306
194	76	Consistent	Qyld.tamu.3B.49	3B	48.5598	YLD	AcrossME4	Within ME_ADD	5.283	7.5109	3.1555	4.3553	9.4548	4.446	5.0089	-0.5629	-6.7476	3B	5	4.5	5.5	10435017_3b_750	G/A	A	G	chr3B_48559796	10695257_3b_2102	G/C	C	G	chr3B_49861612	1.9555	-0.345	-10.8038	9.1932	NA	NA	NA	NA	NA	NA	NA	NA	NA	NA	NA	NA	NA	NA
219	75	Consistent	Qyld.tamu.3B.49	3B	48.5598	YLD	12UVL	Ind Env-ADD	3.3165	4.9684			9.8167				-17.5772	3B	5	4.5	5.5	10435017_3b_750	G/A	A	G	chr3B_48559796	10695257_3b_2102	G/C	C	G	chr3B_49861612	NA	NA	NA	NA	NA	NA	NA	NA	NA	NA	NA	NA	NA	NA	NA	NA	NA	NA
185	86		Qyld.tamu.3D.590	3D	590.23	YLD	AcrossME2	Within ME_ADD	6.0586	7.2438	4.1996	3.0442	10.5582	7.2972	3.261	4.0362	4.411	3D	113	107.5	113.5	6418712_3dl_218	G/T	T	G	chr3D_590230131	IWB34996	A/T	T	A	chr3D_595110175	-2.9308	4.9162	-3.4018	1.8268	1.2812	-1.6916	NA	NA	NA	NA	NA	NA	NA	NA	NA	NA	NA	NA
207	91	Consistent	Qyld.tamu.4B.267	4B	266.832	YLD	AcrossME1	Within ME_ADD	5.6685	23.7018	1.5486	22.1532	36.2852	1.3268	34.9583	-33.6315	-3.3784	4B	39	38.5	39.5	4883984_4bs_7910	G/A	A	G	chr4B_266831997	4915276_4bs_830	C/T	C	T	chr4B_284871153	7.0426	5.6666	6.4004	14.9225	-34.0322	NA	NA	NA	NA	NA	NA	NA	NA	NA	NA	NA	NA	NA
210	90	Consistent	Qyld.tamu.4B.267	4B	266.832	YLD	across all env	Multi Env-ADD	14.4009	28.1006	0.1523	27.9482	63.4885	0.1791	63.3094	-63.1303	0.4175	4B	39	38.5	39.5	4883984_4bs_7910	G/A	A	G	chr4B_266831997	4915276_4bs_830	C/T	C	T	chr4B_284871153	0.5143	3.2467	-0.691	-0.688	-0.1562	6.9563	-2.0884	-0.2172	-0.4254	2.0594	3.6798	-1.2332	4.7563	6.4302	-1.0885	-0.3029	1.745	-0.0312
220	89	Consistent	Qyld.tamu.4B.267	4B	266.832	YLD	17CVI	Ind Env-ADD	3.3165	20.3723			22.3242				-37.4106	4B	39	38.5	39.5	4883984_4bs_7910	G/A	A	G	chr4B_266831997	4915276_4bs_830	C/T	C	T	chr4B_284871153	NA	NA	NA	NA	NA	NA	NA	NA	NA	NA	NA	NA	NA	NA	NA	NA	NA	NA
191	96	Consistent/Pleiotropic	Qyld.tamu.4B.659	4B	659.156	YLD	AcrossME1	Within ME_ADD	5.6685	6.7542	5.5814	1.1727	6.4754	4.8792	1.5961	3.2831	6.4252	4B	94	93.5	94.5	IWA27	A/G	A	G	chr4B_659155620	IWB3567	A/G	A	G	chr4B_660589109	-4.4132	3.4585	-2.9747	5.0885	-1.1592	NA	NA	NA	NA	NA	NA	NA	NA	NA	NA	NA	NA	NA
221	95	Consistent/Pleiotropic	Qyld.tamu.4B.659	4B	659.156	YLD	14EP4	Ind Env-ADD	3.3165	3.5646			9.816				9.8837	4B	94	93.5	94.5	IWA27	A/G	A	G	chr4B_659155620	IWB3567	A/G	A	G	chr4B_660589109	NA	NA	NA	NA	NA	NA	NA	NA	NA	NA	NA	NA	NA	NA	NA	NA	NA	NA
200	98	Consistent	Qyld.tamu.4B.661	4B	660.943	YLD	AcrossME3	Within ME_ADD	5.2092	5.2612	2.9544	2.3068	8.3545	3.32	5.0345	-1.7145	3.2834	4B	99	97.5	100.5	IWB32997	T/C	C	T	chr4B_660943213	7020900_4bl_2127	G/A	A	G	chr4B_662538355	-4.4466	6.2442	0.6845	-2.4821	NA	NA	NA	NA	NA	NA	NA	NA	NA	NA	NA	NA	NA	NA
222	97	Consistent	Qyld.tamu.4B.661	4B	660.943	YLD	12UVLD	Ind Env-ADD	3.3165	4.2646			11.8914				9.6458	4B	99	97.5	100.5	IWB32997	T/C	C	T	chr4B_660943213	7020900_4bl_2127	G/A	A	G	chr4B_662538355	NA	NA	NA	NA	NA	NA	NA	NA	NA	NA	NA	NA	NA	NA	NA	NA	NA	NA
189	104	Consistent/Pleiotropic	Qyld.tamu.4D.21	4D	20.5797	YLD	AcrossME1	Within ME_ADD	5.6685	8.4343	6.3688	2.0656	8.6475	5.5177	3.1298	2.3879	-6.8425	4D	1	0	4.5	IWB15038	A/G	A	G	chr4D_20579748	IWB61488	T/C	T	C	chr4D_25989315	5.0518	0.1895	4.4989	-0.4228	-9.3173	NA	NA	NA	NA	NA	NA	NA	NA	NA	NA	NA	NA	NA
192	103	Consistent/Pleiotropic	Qyld.tamu.4D.21	4D	20.5797	YLD	Across ME1234	Across ME-ADD	5.1908	6.3134	4.1299	2.1834	13.2846	4.8287	8.4559	-3.6272	-2.5505	4D	0	0	0.5	IWB15038	A/G	A	G	chr4D_20579748	IWB61488	T/C	T	C	chr4D_25989315	-5.7673	1.0397	2.5155	2.2122	NA	NA	NA	NA	NA	NA	NA	NA	NA	NA	NA	NA	NA	NA
223	102	Consistent/Pleiotropic	Qyld.tamu.4D.21	4D	20.5797	YLD	ME1	Ind ME_ADD	3.315	5.3583			19.3546				-8.3178	4D	0	0	0.5	IWB15038	A/G	A	G	chr4D_20579748	IWB61488	T/C	T	C	chr4D_25989315	NA	NA	NA	NA	NA	NA	NA	NA	NA	NA	NA	NA	NA	NA	NA	NA	NA	NA
224	105	Consistent/Pleiotropic	Qyld.tamu.4D.21	4D	20.5797	YLD	17CVI	Ind Env-ADD	3.3165	5.6108			4.853				-17.3194	4D	2	0	4.5	IWB15038	A/G	A	G	chr4D_20579748	IWB61488	T/C	T	C	chr4D_25989315	NA	NA	NA	NA	NA	NA	NA	NA	NA	NA	NA	NA	NA	NA	NA	NA	NA	NA
184	122	Consistent/Pleiotropic	Qyld.tamu.4D.110	4D	109.804	YLD	AcrossME1	Within ME_ADD	5.6685	11.7185	8.5985	3.12	20.308	7.8592	12.4488	-4.5896	-8.158	4D	13	12.5	13.5	2279925_4ds_1008	C/T	T	C	chr4D_109804326	IWB3253	T/C	T	C	chr4D_121181672	8.936	4.6804	0.1824	-19.7464	5.9477	NA	NA	NA	NA	NA	NA	NA	NA	NA	NA	NA	NA	NA
201	121	Consistent/Pleiotropic	Qyld.tamu.4D.110	4D	109.804	YLD	across all env	Multi Env-ADD	14.4009	18.0186	2.4082	15.6104	41.3137	2.8133	38.5004	-35.6871	-1.6419	4D	13	12.5	13.5	2279925_4ds_1008	C/T	T	C	chr4D_109804326	IWB3253	T/C	T	C	chr4D_121181672	2.5446	2.4245	0.1659	2.886	0.566	-6.2352	-7.0989	1.7048	1.7845	-0.2356	-0.4603	-0.3876	4.0899	4.4867	8.4615	2.9468	3.953	4.2436
225	120	Consistent/Pleiotropic	Qyld.tamu.4D.110	4D	109.804	YLD	17BI	Ind Env-ADD	3.3165	8.2924			18.382				-28.0644	4D	13	12.5	13.5	2279925_4ds_1008	C/T	T	C	chr4D_109804326	IWB3253	T/C	T	C	chr4D_121181672	NA	NA	NA	NA	NA	NA	NA	NA	NA	NA	NA	NA	NA	NA	NA	NA	NA	NA
206	126	Consistent	Qyld.tamu.4D.446	4D	445.501	YLD	AcrossME4	Within ME_ADD	5.283	13.7823	1.1215	12.6609	2.3468	1.5621	0.7847	0.7774	3.9849	4D	28	27.5	28.5	IWB3336	T/C	T	C	chr4D_445500980	IWB20689	A/G	G	A	chr4D_455250967	-1.8758	-2.7277	0.0269	4.5766	NA	NA	NA	NA	NA	NA	NA	NA	NA	NA	NA	NA	NA	NA
209	125	Consistent	Qyld.tamu.4D.446	4D	445.501	YLD	across all env	Multi Env-ADD	14.4009	21.1646	0.2134	20.9512	12.9364	0.2304	12.7061	-12.4757	-0.4705	4D	28	27.5	28.5	IWB3336	T/C	T	C	chr4D_445500980	IWB20689	A/G	G	A	chr4D_455250967	0.801	1.4944	-1.9368	-0.1877	-3.0784	-11.0058	-2.3637	0.1867	1.9694	-1.144	-1.1348	1.4849	2.4992	1.8418	4.4537	1.8091	2.0975	4.6279
226	124	Consistent	Qyld.tamu.4D.446	4D	445.501	YLD	14CH	Ind Env-ADD	3.3165	13.4226			28.2304				8.5901	4D	28	27.5	28.5	IWB3336	T/C	T	C	chr4D_445500980	IWB20689	A/G	G	A	chr4D_455250967	NA	NA	NA	NA	NA	NA	NA	NA	NA	NA	NA	NA	NA	NA	NA	NA	NA	NA
227	131		Qyld.tamu.5A.555	5A	555.068	YLD	ME3	Ind ME_ADD	3.315	3.6579			1.3913				-3.2374	5A	112	103.5	112.5	IWB10117	A/G	G	A	chr5A_555067953	IWA6681	T/G	G	T	chr5A_580939278	NA	NA	NA	NA	NA	NA	NA	NA	NA	NA	NA	NA	NA	NA	NA	NA	NA	NA
228	147	Pleiotropic	Qyld.tamu.6A.12	6A	12.42	YLD	17BI	Ind Env-ADD	3.3165	4.3714			8.9429				-19.5848	6A	20	19.5	20.5	4344525_6as_6773	G/C	C	G	chr6A_12419954	4414591_6as_1756	T/G	G	T	chr6A_12459433	NA	NA	NA	NA	NA	NA	NA	NA	NA	NA	NA	NA	NA	NA	NA	NA	NA	NA
212	155	Consistent/Pleiotropic	Qyld.tamu.6A.609	6A	608.501	YLD	Across ME1234	Across ME-ADD	5.1908	5.4387	0.1249	5.3138	5.1554	0.1345	5.0208	-4.8863	-0.4249	6A	139	138.5	139.5	IWB45148	T/C	T	C	chr6A_608501002	5782872_6al_2665	T/C	T	C	chr6A_608572839	3.9973	0.5259	-2.7459	-1.7772	NA	NA	NA	NA	NA	NA	NA	NA	NA	NA	NA	NA	NA	NA
229	154	Consistent/Pleiotropic	Qyld.tamu.6A.609	6A	608.501	YLD	ME3	Ind ME_ADD	3.315	3.6803			1.3764				-3.1785	6A	139	138.5	139.5	IWB45148	T/C	T	C	chr6A_608501002	5782872_6al_2665	T/C	T	C	chr6A_608572839	NA	NA	NA	NA	NA	NA	NA	NA	NA	NA	NA	NA	NA	NA	NA	NA	NA	NA
230	176		Qyld.tamu.6D.20	6D	19.6436	YLD	14CH	Ind Env-ADD	3.3165	4.3122			7.7375				4.5184	6D	1	0	1.5	2080712_6ds_6490	G/A	A	G	chr6D_19643622	2122439_6ds_3413	G/A	A	G	chr6D_20474555	NA	NA	NA	NA	NA	NA	NA	NA	NA	NA	NA	NA	NA	NA	NA	NA	NA	NA
190	192	Consistent/Pleiotropic	Qyld.tamu.7B.16	7B	15.5928	YLD	AcrossME3	Within ME_ADD	5.2092	8.4266	4.2507	4.1759	6.7209	4.8798	1.841	3.0388	-4.0121	7B1	24	23.5	24.5	IWA1089	A/C	A	C	chr7B_15592759	IWB3369	T/C	T	C	chr7B_17656855	-3.1588	-1.3873	3.2869	1.2593	NA	NA	NA	NA	NA	NA	NA	NA	NA	NA	NA	NA	NA	NA
203	194	Consistent/Pleiotropic	Qyld.tamu.7B.16	7B	15.5928	YLD	Across ME1234	Across ME-ADD	5.1908	8.3524	2.3557	5.9967	4.5604	2.5466	2.0138	0.5328	-1.8651	7B1	24	23.5	24.5	IWA1089	A/C	A	C	chr7B_15592759	IWB3369	T/C	T	C	chr7B_17656855	0.9809	1.3107	-2.8337	0.5421	NA	NA	NA	NA	NA	NA	NA	NA	NA	NA	NA	NA	NA	NA
232	193	Consistent/Pleiotropic	Qyld.tamu.7B.16	7B	15.5928	YLD	ME3	Ind ME_ADD	3.315	7.9835			3.3067				-4.9728	7B1	24	23.5	24.5	IWA1089	A/C	A	C	chr7B_15592759	IWB3369	T/C	T	C	chr7B_17656855	NA	NA	NA	NA	NA	NA	NA	NA	NA	NA	NA	NA	NA	NA	NA	NA	NA	NA
231	191	Consistent/Pleiotropic	Qyld.tamu.7B.16	7B	15.5928	YLD	12CH	Ind Env-ADD	3.3165	6.0488			10.855				-7.2277	7B1	24	23.5	24.5	IWA1089	A/C	A	C	chr7B_15592759	IWB3369	T/C	T	C	chr7B_17656855	NA	NA	NA	NA	NA	NA	NA	NA	NA	NA	NA	NA	NA	NA	NA	NA	NA	NA
233	197		Qyld.tamu.7B.617	7B	616.964	YLD	12CH	Ind Env-ADD	3.3165	5.1169			9.2942				6.6984	7B1	100	98.5	100.5	6722360_7bl_819	C/T	T	C	chr7B_616964338	6743328_7bl_413	A/G	A	G	chr7B_626381393	NA	NA	NA	NA	NA	NA	NA	NA	NA	NA	NA	NA	NA	NA	NA	NA	NA	NA
187	202		Qyld.tamu.7D.45	7D	45.1043	YLD	AcrossME4	Within ME_ADD	5.283	5.6545	4.3729	1.2816	8.5079	5.9581	2.5498	3.4083	7.7675	7D	71	68.5	71.5	3945987_7ds_6173	C/T	T	C	chr7D_45104258	3907947_7ds_3386	C/T	C	T	chr7D_47429198	-0.2623	3.0059	5.3518	-8.0954	NA	NA	NA	NA	NA	NA	NA	NA	NA	NA	NA	NA	NA	NA
204	203		Qyld.tamu.7D.59	7D	58.8684	YLD	Across ME1234	Across ME-ADD	5.1908	10.2594	2.0482	8.2112	9.8465	2.2958	7.5507	-5.2549	1.7602	7D	78	77.5	78.5	IWB6964	A/G	G	A	chr7D_58868393	IWB35446	T/C	T	C	chr7D_60599997	-4.966	-0.5788	2.3302	3.2146	NA	NA	NA	NA	NA	NA	NA	NA	NA	NA	NA	NA	NA	NA
183	211	Consistent/Pleiotropic	Qyld.tamu.7D.61	7D	60.6	YLD	AcrossME3	Within ME_ADD	5.2092	12.8123	11.1907	1.6216	13.7261	13.2566	0.4695	12.7871	6.5692	7D	79	78.5	80.5	IWB35446	T/C	T	C	chr7D_60599997	3950120_7ds_5316	C/T	T	C	chr7D_64327425	-0.3799	2.0307	-0.3343	-1.3166	NA	NA	NA	NA	NA	NA	NA	NA	NA	NA	NA	NA	NA	NA
205	210	Consistent/Pleiotropic	Qyld.tamu.7D.61	7D	60.6	YLD	across all env	Multi Env-ADD	14.4009	22.1255	1.3926	20.7329	20.0713	1.594	18.4772	-16.8832	1.2379	7D	79	78.5	80.5	IWB35446	T/C	T	C	chr7D_60599997	3950120_7ds_5316	C/T	T	C	chr7D_64327425	-0.1498	-2.0475	-2.0754	-3.4116	3.936	-1.3227	4.0021	-1.1741	4.8781	-1.4798	-1.2314	-1.4003	7.6874	9.7842	-0.452	7.2818	-0.0475	-4.2606
234	209	Consistent/Pleiotropic	Qyld.tamu.7D.61	7D	60.6	YLD	12UVD	Ind Env-ADD	3.3165	3.5001			9.711				8.7275	7D	79	77.5	79.5	IWB35446	T/C	T	C	chr7D_60599997	3950120_7ds_5316	C/T	T	C	chr7D_64327425	NA	NA	NA	NA	NA	NA	NA	NA	NA	NA	NA	NA	NA	NA	NA	NA	NA	NA
235	212	Consistent/Pleiotropic	Qyld.tamu.7D.64	7D	64.3274	YLD	12CH	Ind Env-ADD	3.3165	5.0275			8.7501				6.4472	7D	80	78.5	83.5	3950120_7ds_5316	C/T	T	C	chr7D_64327425	IWA1247	T/C	T	C	chr7D_72946905	NA	NA	NA	NA	NA	NA	NA	NA	NA	NA	NA	NA	NA	NA	NA	NA	NA	NA
236	213	Consistent/Pleiotropic	Qyld.tamu.7D.64	7D	64.3274	YLD	17BD	Ind Env-ADD	3.3165	3.9491			12.5162				6.0096	7D	80	78.5	82.5	3950120_7ds_5316	C/T	T	C	chr7D_64327425	IWA1247	T/C	T	C	chr7D_72946905	NA	NA	NA	NA	NA	NA	NA	NA	NA	NA	NA	NA	NA	NA	NA	NA	NA	NA
237	214	Consistent/Pleiotropic	Qyld.tamu.7D.64	7D	64.3274	YLD	ME3	Ind ME_ADD	3.315	6.3996			2.4811				4.2751	7D	80	77.5	80.5	3950120_7ds_5316	C/T	T	C	chr7D_64327425	IWA1247	T/C	T	C	chr7D_72946905	NA	NA	NA	NA	NA	NA	NA	NA	NA	NA	NA	NA	NA	NA	NA	NA	NA	NA
238	217		Qyld.tamu.7D.73	7D	72.9469	YLD	14CH	Ind Env-ADD	3.3165	3.6681			6.773				4.2394	7D	86	84.5	86.5	IWA1247	T/C	T	C	chr7D_72946905	IWB44453	T/C	C	T	chr7D_78504849	NA	NA	NA	NA	NA	NA	NA	NA	NA	NA	NA	NA	NA	NA	NA	NA	NA	NA
188	230	Consistent	Qyld.tamu.7D.84	7D	84.3387	YLD	AcrossME1	Within ME_ADD	5.6685	7.6117	6.6053	1.0063	11.3231	5.7807	5.5424	0.2383	-7.0053	7D	97	94.5	99.5	3938880_7ds_2029	G/A	G	A	chr7D_84338704	3853219_7ds_2287	A/G	G	A	chr7D_90196112	4.656	1.6798	2.6786	-13.5334	4.519	NA	NA	NA	NA	NA	NA	NA	NA	NA	NA	NA	NA	NA
213	229	Consistent	Qyld.tamu.7D.84	7D	84.3387	YLD	across all env	Multi Env-ADD	14.4009	16.9927	0	16.9927	28.8609	0	28.8609	-28.8609	-0.0044	7D	97	95.5	98.5	3938880_7ds_2029	G/A	G	A	chr7D_84338704	3853219_7ds_2287	A/G	G	A	chr7D_90196112	1.4434	-2.2921	1.7252	-1.127	1.3214	0.0733	1.48	-0.2955	-0.2781	2.6282	-1.0213	3.871	11.1175	9.8759	2.5048	1.4609	0.7014	-3.4797
239	228	Consistent	Qyld.tamu.7D.84	7D	84.3387	YLD	17BI	Ind Env-ADD	3.3165	5.0394			11.0662				-21.7991	7D	97	93.5	99.5	3938880_7ds_2029	G/A	G	A	chr7D_84338704	3853219_7ds_2287	A/G	G	A	chr7D_90196112	NA	NA	NA	NA	NA	NA	NA	NA	NA	NA	NA	NA	NA	NA	NA	NA	NA	NA
199	236	Consistent	Qyld.tamu.7D.591	7D	591.204	YLD	AcrossME2	Within ME_ADD	6.0586	7.0088	1.968	5.0408	7.822	3.4624	4.3596	-0.8972	2.9954	7D	181	180.5	181.5	IWB10006	A/G	G	A	chr7D_591204218	3394445_7dl_13455	C/T	T	C	chr7D_591394250	-1.9034	6.8898	-0.5218	0.1112	-0.5647	-4.0111	NA	NA	NA	NA	NA	NA	NA	NA	NA	NA	NA	NA
240	235	Consistent	Qyld.tamu.7D.591	7D	591.204	YLD	12BD	Ind Env-ADD	3.3165	4.7318			13.4712				2.4744	7D	181	180.5	182.5	IWB10006	A/G	G	A	chr7D_591204218	3394445_7dl_13455	C/T	T	C	chr7D_591394250	NA	NA	NA	NA	NA	NA	NA	NA	NA	NA	NA	NA	NA	NA	NA	NA	NA	NA
241	238		Qyld.tamu.7D.599	7D	598.615	YLD	13EP4	Ind Env-ADD	3.3165	3.3544			9.0076				4.5169	7D	198	196.5	199.5	IWB45562	T/G	T	G	chr7D_598614906	3367265_7dl_1387	A/G	G	A	chr7D_598666837	NA	NA	NA	NA	NA	NA	NA	NA	NA	NA	NA	NA	NA	NA	NA	NA	NA	NA
132	3	Pleiotropic	Qtw.tamu.1A.12	1A	11.8197	TW	across all env	Multi Env-ADD	11.479	12.5747	7.7671	4.8076	1.5998	1.0095	0.5903	0.4192	-1.8691	1A	9	8.5	9.5	IWB46642	A/G	A	G	chr1A_11819733	IWB22868	A/G	G	A	chr1A_13765948	0.528	0.5614	1.5632	-0.6464	-0.1513	-0.3548	-1.172	-1.606	-1.5804	2.6852	-1.6519	-2.231	2.5749	1.846	0.6627	-0.3488	1.0745	-0.353
120	4		Qtw.tamu.1A.21	1A	21.0406	TW	across all env	Multi Env-ADD	11.479	13.8647	9.0942	4.7705	1.7736	1.182	0.5917	0.5903	-2.0232	1A	13	11.5	13.5	IWB21788	A/G	G	A	chr1A_21040639	IWA2583	A/C	A	C	chr1A_21048534	0.5482	0.4043	1.6766	-0.548	-0.2105	-0.4277	-1.1015	-1.4607	-1.4514	2.7646	-1.6004	-2.2842	2.579	1.7617	0.8088	-0.2318	0.9442	-0.5666
127	5		Qtw.tamu.1A.25	1A	25.4799	TW	across all env	Multi Env-ADD	11.479	13.1567	8.5503	4.6064	1.6667	1.107	0.5597	0.5473	-1.9579	1A	15	14.5	15.5	3310348_1as_2438	T/C	C	T	chr1A_25479893	IWB28549	T/C	C	T	chr1A_28620434	0.5173	0.3771	1.5944	-0.573	-0.2093	-0.5065	-1.0841	-1.3848	-1.4065	2.8044	-1.5325	-2.1545	2.479	1.7131	0.7422	-0.2548	0.935	-0.4665
123	7		Qtw.tamu.1A.233	1A	232.645	TW	across all env	Multi Env-ADD	11.479	13.5171	8.7974	4.7197	1.7048	1.1408	0.564	0.5768	-1.9859	1A	22	20.5	22.5	3877153_1al_1567	G/A	A	G	chr1A_232644690	1459688_1al_1642	T/C	C	T	chr1A_235689712	0.5302	0.3506	1.7055	-0.4886	-0.2354	-0.4381	-1.057	-1.4265	-1.2984	2.7093	-1.5939	-2.2008	2.4837	1.74	0.74	-0.2905	0.9874	-0.6507
129	9		Qtw.tamu.1A.251	1A	251.309	TW	across all env	Multi Env-ADD	11.479	13.1133	8.4443	4.6689	1.6365	1.0989	0.5376	0.5613	-1.9475	1A	24	23.5	24.5	3923134_1al_161	C/T	T	C	chr1A_251308630	3939428_1al_3475	G/A	A	G	chr1A_254989242	0.5119	0.2948	1.7357	-0.427	-0.2615	-0.4487	-1.0108	-1.3911	-1.1395	2.6522	-1.5876	-2.1146	2.3849	1.7176	0.6688	-0.3514	1.0324	-0.7382
117	10		Qtw.tamu.1A.291	1A	290.732	TW	across all env	Multi Env-ADD	11.479	14.1123	9.3716	4.7407	1.7947	1.2169	0.5778	0.6391	-2.058	1A	29	27.5	29.5	3909230_1al_1823	G/A	A	G	chr1A_290731869	3956900_1al_1584	G/A	A	G	chr1A_293952352	0.4715	0.6365	1.7076	-0.6564	-0.1826	-0.5293	-0.9862	-1.5717	-1.6945	2.8242	-1.5907	-2.1791	2.4787	1.5197	0.7275	-0.2769	1.079	-0.3637
121	14		Qtw.tamu.1A.304	1A	304.105	TW	across all env	Multi Env-ADD	11.479	13.7925	9.0322	4.7603	1.7583	1.1729	0.5854	0.5875	-2.015	1A	34	33.5	35.5	3916820_1al_4455	C/T	T	C	chr1A_304105448	3955448_1al_1513	G/C	G	C	chr1A_308745343	0.5443	0.3925	1.6828	-0.5349	-0.2158	-0.4299	-1.0917	-1.4532	-1.4179	2.7524	-1.5989	-2.266	2.5582	1.7567	0.7937	-0.2445	0.9536	-0.585
118	15		Qtw.tamu.1A.339	1A	339.351	TW	across all env	Multi Env-ADD	11.479	13.8232	9.3418	4.4814	1.7463	1.2115	0.5348	0.6767	-2.0502	1A	39	38.5	41.5	3895363_1al_1924	G/A	G	A	chr1A_339351112	3886798_1al_2520	T/C	T	C	chr1A_341181093	0.6057	0.6398	1.6679	-0.7443	-0.1608	-0.5504	-1.0926	-1.4503	-1.6699	2.5523	-1.449	-2.0456	2.3711	1.6355	0.714	-0.2765	1.0484	-0.4892
124	16		Qtw.tamu.1A.359	1A	358.771	TW	across all env	Multi Env-ADD	11.479	12.9727	8.7944	4.1782	1.5651	1.1377	0.4274	0.7103	-1.9768	1A	44	43.5	45.5	3944816_1al_8842	G/A	G	A	chr1A_358771162	3943651_1al_2510	C/G	G	C	chr1A_359972952	0.5332	0.1293	1.8455	-0.8574	-0.6024	-0.3501	-1.0732	-0.7359	-0.6779	2.0508	-1.2087	-1.841	2.4533	1.5112	0.6066	-0.3303	0.6603	-0.6638
108	17	Consistent	Qtw.tamu.1A.381	1A	380.651	TW	across all env	Multi Env-ADD	11.479	14.6875	10.5869	4.1006	1.8972	1.3866	0.5106	0.876	-2.1843	1A	51	50.5	51.5	3916130_1al_8063	C/G	G	C	chr1A_380651438	3971652_1al_814	G/A	A	G	chr1A_381927793	0.5944	0.528	2.1493	-0.2978	-0.4431	-0.0909	-0.5302	-0.9174	-0.346	-2.9809	-1.2981	-1.5515	2.9536	1.4789	0.6707	-0.1639	1.1746	-0.0076
95	18	Consistent	Qtw.tamu.1A.381	1A	380.651	TW	AcrossME2	Within ME_ADD	8.6675	9.041	6.1194	2.9216	2.3218	1.5042	0.8176	0.6866	-2.057	1A	51	50.5	51.5	3916130_1al_8063	C/G	G	C	chr1A_380651438	3971652_1al_814	G/A	A	G	chr1A_381927793	0.4671	2.022	-0.4251	-0.2183	-3.1082	-1.6788	2.8262	0.5433	-0.2912	1.0473	-0.135	-1.0494	NA	NA	NA	NA	NA	NA
116	19		Qtw.tamu.1A.390	1A	390.095	TW	across all env	Multi Env-ADD	11.479	14.23	9.4067	4.8232	1.7255	1.2183	0.5072	0.7111	-2.0523	1A	53	52.5	54.5	IWB31924	T/C	C	T	chr1A_390094587	3977707_1al_5771	A/G	G	A	chr1A_392526732	0.3272	0.4117	1.8361	-0.6343	-0.4438	-0.4015	-0.9358	-1.433	-1.2543	2.361	-1.5367	-1.9787	2.7981	1.4043	0.5319	-0.347	0.7504	-0.1241
139	22	Consistent	Qtw.tamu.1A.485	1A	485.183	TW	13EP5	Ind Env-ADD	3.327	4.0542			5.1563				-4.9145	1A	64	63.5	64.5	3894604_1al_116	T/C	T	C	chr1A_485182809	2282330_1al_1624	A/C	A	C	chr1A_485210044	NA	NA	NA	NA	NA	NA	NA	NA	NA	NA	NA	NA	NA	NA	NA	NA	NA	NA
96	23	Consistent	Qtw.tamu.1A.485	1A	485.183	TW	across all env	Multi Env-ADD	11.479	17.3604	11.5444	5.8159	2.0954	1.5004	0.595	0.9054	-2.2778	1A	64	63.5	64.5	3894604_1al_116	T/C	T	C	chr1A_485182809	2282330_1al_1624	A/C	A	C	chr1A_485210044	0.5025	1.0182	2.4432	-0.1647	-0.233	0.0544	-0.2463	-1.4971	-0.9164	2.4302	-0.8081	-1.1935	-2.6216	2.3902	0.8533	0.0076	0.9669	-0.5133
83	24	Consistent	Qtw.tamu.1A.485	1A	485.183	TW	AcrossME2	Within ME_ADD	8.6675	11.699	7.373	4.3259	2.6361	1.7963	0.8397	0.9566	-2.2534	1A	64	63.5	64.5	3894604_1al_116	T/C	T	C	chr1A_485182809	2282330_1al_1624	A/C	A	C	chr1A_485210044	0.4779	2.4189	-0.1893	0.0296	2.4059	-1.2178	-2.6464	0.8287	-0.0169	0.9425	-0.5369	-2.4962	NA	NA	NA	NA	NA	NA
140	34	Consistent	Qtw.tamu.1D.375	1D	375.429	TW	12EP3	Ind Env-ADD	3.327	4.9179			11.8755				6.1333	1D	46	45.5	46.5	2263785_1dl_1257	A/C	C	A	chr1D_375429093	IWB9807	A/G	A	G	chr1D_379833963	NA	NA	NA	NA	NA	NA	NA	NA	NA	NA	NA	NA	NA	NA	NA	NA	NA	NA
113	35	Consistent	Qtw.tamu.1D.375	1D	375.429	TW	across all env	Multi Env-ADD	11.479	16.8613	9.6182	7.2432	2.1617	1.2556	0.9061	0.3495	2.0723	1D	46	45.5	46.5	2263785_1dl_1257	A/C	C	A	chr1D_375429093	IWB9807	A/G	A	G	chr1D_379833963	0.0141	-1.0715	-0.7595	-1.8211	-0.3424	4.0257	0.012	-2.4811	-0.4618	1.7815	4.1407	-0.9496	0.2639	-2.2925	-0.7078	-0.3901	0.2458	-0.939
81	36		Qtw.tamu.1D.375	1D	375.429	TW	AcrossME2	Within ME_ADD	8.6675	11.6707	7.6062	4.0645	2.7042	1.8602	0.8439	1.0163	2.2806	1D	46	45.5	46.5	2263785_1dl_1257	A/C	C	A	chr1D_375429093	IWB9807	A/G	A	G	chr1D_379833963	-0.1942	-0.9673	-2.0282	3.818	1.5744	-1.1572	0.0556	-0.9154	-0.5978	0.0361	-1.1463	1.5222	NA	NA	NA	NA	NA	NA
141	37		Qtw.tamu.1D.380	1D	379.834	TW	13EP3	Ind Env-ADD	3.327	4.2747			13.4631				6.6791	1D	47	45.5	48.5	IWB9807	A/G	A	G	chr1D_379833963	2287319_1dl_5612	G/A	A	G	chr1D_388774891	NA	NA	NA	NA	NA	NA	NA	NA	NA	NA	NA	NA	NA	NA	NA	NA	NA	NA
142	39	Consistent/Pleiotropic	Qtw.tamu.1D.422	1D	421.848	TW	12CH	Ind Env-ADD	3.327	6.422			9.9402				6.4127	1D	69	68.5	69.5	2237051_1dl_3543	T/C	C	T	chr1D_421848091	3965563_1al_2116	C/A	C	A	chr1D_425676570	NA	NA	NA	NA	NA	NA	NA	NA	NA	NA	NA	NA	NA	NA	NA	NA	NA	NA
107	40	Consistent/Pleiotropic	Qtw.tamu.1D.422	1D	421.848	TW	across all env	Multi Env-ADD	11.479	20.0981	10.6841	9.4141	2.6942	1.3994	1.2948	0.1046	2.1908	1D	69	68.5	69.5	2237051_1dl_3543	T/C	C	T	chr1D_421848091	3965563_1al_2116	C/A	C	A	chr1D_425676570	0.5395	-2.4501	4.0747	0.5589	3.2452	-1.1275	-0.6234	-1.9303	-0.8098	-0.5787	-0.9516	3.8783	-2.0579	-3.8024	-0.7547	-0.6726	0.452	0.1154
54	43	Consistent/Pleiotropic	Qtw.tamu.1D.422	1D	421.848	TW	Across ME12	Across ME-ADD	4.1448	5.2702	5.1335	0.1367	10.4144	10.165	0.2494	9.9156	3.2451	1D	69	68.5	69.5	2237051_1dl_3543	T/C	C	T	chr1D_421848091	3965563_1al_2116	C/A	C	A	chr1D_425676570	-0.5083	0.5083	NA	NA	NA	NA	NA	NA	NA	NA	NA	NA	NA	NA	NA	NA	NA	NA
66	41	Consistent/Pleiotropic	Qtw.tamu.1D.422	1D	421.848	TW	AcrossME2	Within ME_ADD	8.6675	16.1873	11.3926	4.7947	4.0994	2.8118	1.2876	1.5242	2.8077	1D	69	68.5	69.5	2237051_1dl_3543	T/C	C	T	chr1D_421848091	3965563_1al_2116	C/A	C	A	chr1D_425676570	-0.0738	3.4678	-0.0458	-1.7334	-1.1927	3.2698	-2.6757	-1.3687	-1.2848	-0.1529	-0.4935	2.2838	NA	NA	NA	NA	NA	NA
143	42	Consistent/Pleiotropic	Qtw.tamu.1D.422	1D	421.848	TW	ME2	Ind ME_ADD	3.3817	3.455			10.9875				3.7534	1D	69	68.5	69.5	2237051_1dl_3543	T/C	C	T	chr1D_421848091	3965563_1al_2116	C/A	C	A	chr1D_425676570	NA	NA	NA	NA	NA	NA	NA	NA	NA	NA	NA	NA	NA	NA	NA	NA	NA	NA
128	53		Qtw.tamu.1D.490	1D	489.719	TW	across all env	Multi Env-ADD	11.479	11.958	8.4438	3.5142	1.6568	1.101	0.5558	0.5452	1.9512	1D	117	116.5	117.5	IWB17626	A/C	C	A	chr1D_489719471	IWB55371	A/G	A	G	chr1D_491044422	-2.637	-0.7937	-0.5168	-0.9557	-0.7387	0.539	1.07	-0.0984	1.6083	2.108	0.4221	1.3302	-0.749	2.8606	-0.4489	-1.2079	1.2693	-1.3257
144	63	Consistent	Qtw.tamu.2B.709	2B	708.735	TW	13EP5	Ind Env-ADD	3.327	7.2543			10.0838				6.9052	2B	124	123.5	124.5	8055466_2bl_812	T/G	T	G	chr2B_708735252	8044884_2bl_13684	G/A	G	A	chr2B_709783620	NA	NA	NA	NA	NA	NA	NA	NA	NA	NA	NA	NA	NA	NA	NA	NA	NA	NA
91	64	Consistent	Qtw.tamu.2B.709	2B	708.735	TW	across all env	Multi Env-ADD	11.479	20.335	12.2808	8.0542	2.1921	1.6073	0.5848	1.0225	2.3637	2B	124	123.5	124.5	8055466_2bl_812	T/G	T	G	chr2B_708735252	8044884_2bl_13684	G/A	G	A	chr2B_709783620	-0.7154	-0.6291	-0.2431	0.1561	-2.3337	-1.1231	-1.6179	-1.3514	0.8175	1.5415	-0.5836	0.8435	4.4153	0.4527	0.2492	-0.5073	0.2395	1.2513
67	65	Consistent	Qtw.tamu.2B.709	2B	708.735	TW	AcrossME2	Within ME_ADD	8.6675	17.3098	11.2686	6.0413	3.4994	2.7712	0.7282	2.043	2.8064	2B	124	123.5	124.5	8055466_2bl_812	T/G	T	G	chr2B_708735252	8044884_2bl_13684	G/A	G	A	chr2B_709783620	-1.151	-0.683	-0.2759	-1.5594	1.1003	0.4105	3.9803	-0.1887	-0.944	-0.2028	0.812	-1.2983	NA	NA	NA	NA	NA	NA
145	66		Qtw.tamu.2B.746	2B	745.858	TW	12EP3	Ind Env-ADD	3.327	3.6253			8.5346				5.2769	2B	141	140.5	141.5	8091350_2bl_6123	C/T	T	C	chr2B_745858426	7979248_2bl_3497	G/C	C	G	chr2B_747239457	NA	NA	NA	NA	NA	NA	NA	NA	NA	NA	NA	NA	NA	NA	NA	NA	NA	NA
146	69		Qtw.tamu.2D.82	2D	82.034	TW	13EP5	Ind Env-ADD	3.327	5.2596			6.9334				5.6942	2D	103	100.5	105.5	5329935_2ds_3804	G/A	G	A	chr2D_82033993	9861581_2dl_506	G/C	G	C	chr2D_486784732	NA	NA	NA	NA	NA	NA	NA	NA	NA	NA	NA	NA	NA	NA	NA	NA	NA	NA
93	70	Consistent	Qtw.tamu.2D.487	2D	486.785	TW	across all env	Multi Env-ADD	11.479	19.4375	12.1816	7.2559	2.2095	1.5703	0.6392	0.9311	2.3272	2D	104	102.5	104.5	9861581_2dl_506	G/C	G	C	chr2D_486784732	9821121_2dl_24264	C/A	A	C	chr2D_513026603	0.1994	-0.66	-0.2005	1.6476	1.0942	0.6939	0.3976	-0.3427	0.6449	1.6335	0.8579	0.4173	3.1659	-3.6485	-0.8969	-1.2089	-0.0463	-1.6771
74	71	Consistent	Qtw.tamu.2D.487	2D	486.785	TW	AcrossME2	Within ME_ADD	8.6675	13.7629	8.8582	4.9048	2.9093	2.1635	0.7457	1.4178	2.4697	2D	104	102.5	104.5	9861581_2dl_506	G/C	G	C	chr2D_486784732	9821121_2dl_24264	C/A	A	C	chr2D_513026603	0.0599	-0.3375	1.5092	0.5577	1.49	0.2764	3.0274	-1.0378	-1.348	-0.1825	-1.8136	-2.2012	NA	NA	NA	NA	NA	NA
135	72		Qtw.tamu.2D.533	2D	532.963	TW	across all env	Multi Env-ADD	11.479	13.0913	7.0771	6.0142	1.6771	0.9142	0.7628	0.1514	1.7857	2D	115	114.5	115	9842271_2dl_198	G/A	A	G	chr2D_532963304	9831852_2dl_1424	G/A	G	A	chr2D_536603074	-1.0156	0.296	-0.7435	1.4788	1.4699	1.9146	1.2067	-0.6761	-0.2639	3.1818	0.4954	1.8855	-1.2481	-1.5037	-0.5149	-0.9668	-0.3405	-0.2083
147	77	Consistent	Qtw.tamu.3B.507	3B	506.971	TW	12CH	Ind Env-ADD	3.327	4.579			6.6419				-5.2392	3B	25	24.5	27.5	10680128_3b_818	G/C	C	G	chr3B_506970918	IWB34373	T/C	T	C	chr3B_556867060	NA	NA	NA	NA	NA	NA	NA	NA	NA	NA	NA	NA	NA	NA	NA	NA	NA	NA
130	78	Consistent	Qtw.tamu.3B.507	3B	506.971	TW	across all env	Multi Env-ADD	11.479	13.7681	8.3052	5.4629	1.649	1.0718	0.5772	0.4946	-1.9189	3B	27	24.5	27.5	10680128_3b_818	G/C	C	G	chr3B_506970918	IWB34373	T/C	T	C	chr3B_556867060	-0.4194	1.2685	-3.2431	-1.9005	0.6711	-0.6829	1.2756	1.7919	-0.3974	-0.4631	-0.8267	-1.3647	0.7874	1.5095	1.3293	1.1188	-2.2825	1.293
76	79	Consistent	Qtw.tamu.3B.507	3B	506.971	TW	AcrossME2	Within ME_ADD	8.6675	12.1016	8.2339	3.8677	2.7418	1.9886	0.7531	1.2355	-2.3632	3B	27	25.5	27.5	10680128_3b_818	G/C	C	G	chr3B_506970918	IWB34373	T/C	T	C	chr3B_556867060	0.0204	-2.802	-1.4622	-0.2461	-0.0237	-0.9239	1.2314	1.7723	1.5619	-1.8439	1.7395	0.9763	NA	NA	NA	NA	NA	NA
89	80	Consistent	Qtw.tamu.3D.549	3D	548.566	TW	across all env	Multi Env-ADD	11.479	15.6484	12.8647	2.7837	2.0377	1.6704	0.3673	1.3031	-2.3927	3D	53	49.5	53.5	6926803_3dl_1308	A/G	G	A	chr3D_548566475	6895780_3dl_2105	T/C	C	T	chr3D_551071177	2.349	1.671	0.1145	0.2684	-0.9001	0.6879	-1.5395	0.7324	0.0599	-0.927	0.1596	-1.0234	0.3106	-2.438	0.2939	0.3453	0.5215	0.8066
86	81	Consistent	Qtw.tamu.3D.549	3D	548.566	TW	AcrossME2	Within ME_ADD	8.6675	9.3037	7.1162	2.1875	2.0629	1.7354	0.3275	1.4079	-2.205	3D	53	49.5	54.5	6926803_3dl_1308	A/G	G	A	chr3D_548566475	6895780_3dl_2105	T/C	C	T	chr3D_551071177	2.1612	-0.0734	0.08	0.4996	-1.1148	-1.2112	0.1227	0.1057	0.1573	0.3337	0.6192	-1.68	NA	NA	NA	NA	NA	NA
80	82	Consistent	Qtw.tamu.3D.555	3D	554.691	TW	across all env	Multi Env-ADD	11.479	16.6143	14.5825	2.0317	2.262	1.8933	0.3687	1.5246	-2.5657	3D	58	57.5	58.5	6956616_3dl_71	C/T	T	C	chr3D_554691244	6897283_3dl_1083	A/C	C	A	chr3D_559380217	1.8491	2.1557	0.8108	-0.7911	-0.7121	0.8652	-0.7921	1.003	0.2836	-0.6095	-0.625	-1.7982	0.0038	-1.521	0.4253	0.8288	-0.0211	0.7264
71	83	Consistent	Qtw.tamu.3D.555	3D	554.691	TW	AcrossME2	Within ME_ADD	8.6675	11.0242	9.4033	1.6208	2.7184	2.285	0.4334	1.8516	-2.5483	3D	58	57.5	58.5	6956616_3dl_71	C/T	T	C	chr3D_554691244	6897283_3dl_1083	A/C	C	A	chr3D_559380217	1.8318	0.7935	-0.8084	0.8478	-0.6269	-1.8156	-0.0136	0.408	0.8115	-0.0385	0.7091	-2.0988	NA	NA	NA	NA	NA	NA
92	84	Consistent	Qtw.tamu.3D.563	3D	562.699	TW	across all env	Multi Env-ADD	11.479	14.0288	12.272	1.7568	2.0091	1.5821	0.427	1.1551	-2.345	3D	63	62.5	63.5	IWB8129	T/C	C	T	chr3D_562699360	6955795_3dl_1097	T/G	G	T	chr3D_564635656	0.9329	2.4479	0.3999	-1.4447	-0.6064	0.1011	-0.3443	0.5377	0.7833	-0.3804	0.1265	-1.81	0.4907	-0.2401	0.6528	1.1079	-0.5245	1.0694
70	85	Consistent	Qtw.tamu.3D.563	3D	562.699	TW	AcrossME2	Within ME_ADD	8.6675	10.6255	9.6709	0.9546	2.9198	2.3281	0.5918	1.7363	-2.572	3D	63	62.5	63.5	IWB8129	T/C	C	T	chr3D_562699360	6955795_3dl_1097	T/G	G	T	chr3D_564635656	1.16	0.625	-1.222	0.3288	-0.1568	-1.587	0.7162	0.8778	1.3344	-0.3013	1.2995	-3.0746	NA	NA	NA	NA	NA	NA
148	87		Qtw.tamu.4B.11	4B	10.9477	TW	12CH	Ind Env-ADD	3.327	4.0589			6.0367				-5.053	4B	9	5.5	9.5	4960425_4bs_6595	T/C	T	C	chr4B_10947725	4889343_4bs_14724	G/C	G	C	chr4B_13088582	NA	NA	NA	NA	NA	NA	NA	NA	NA	NA	NA	NA	NA	NA	NA	NA	NA	NA
149	88		Qtw.tamu.4B.17	4B	17.044	TW	13EP4	Ind Env-ADD	3.327	3.5648			9.9897				-8.0347	4B	27	20.5	32.5	IWB49194	A/G	G	A	chr4B_17043959	IWB12856	A/G	A	G	chr4B_46621201	NA	NA	NA	NA	NA	NA	NA	NA	NA	NA	NA	NA	NA	NA	NA	NA	NA	NA
150	106	Consistent	Qtw.tamu.4D.29	4D	28.9945	TW	12UV7	Ind Env-ADD	3.327	5.6457			2.4715				7.6631	4D	5	4.5	8.5	IWB30733	A/G	A	G	chr4D_28994521	2280021_4ds_778	G/T	T	G	chr4D_37607464	NA	NA	NA	NA	NA	NA	NA	NA	NA	NA	NA	NA	NA	NA	NA	NA	NA	NA
79	107	Consistent	Qtw.tamu.4D.29	4D	28.9945	TW	AcrossME1	Within ME_ADD	6.6226	7.0586	3.0029	4.0557	5.0111	1.9502	3.0609	-1.1107	1.9487	4D	6	4.5	8.5	IWB30733	A/G	A	G	chr4D_28994521	2280021_4ds_778	G/T	T	G	chr4D_37607464	-1.8426	1.2041	5.5094	-1.2858	-1.4531	-0.5745	-1.5575	NA	NA	NA	NA	NA	NA	NA	NA	NA	NA	NA
151	108		Qtw.tamu.4D.35	4D	35.3604	TW	17BD	Ind Env-ADD	3.327	4.8203			13.5679				7.0386	4D	9	8.5	11.5	2305190_4ds_510	A/G	A	G	chr4D_35360351	2305880_4ds_1018	C/T	C	T	chr4D_62796253	NA	NA	NA	NA	NA	NA	NA	NA	NA	NA	NA	NA	NA	NA	NA	NA	NA	NA
152	109	Consistent	Qtw.tamu.4D.63	4D	62.7963	TW	12BD	Ind Env-ADD	3.327	3.9204			8.0867				3.4716	4D	10	8.5	11.5	2305880_4ds_1018	C/T	C	T	chr4D_62796253	2291802_4ds_4808	C/T	C	T	chr4D_78836923	NA	NA	NA	NA	NA	NA	NA	NA	NA	NA	NA	NA	NA	NA	NA	NA	NA	NA
153	110	Consistent	Qtw.tamu.4D.63	4D	62.7963	TW	12EP1	Ind Env-ADD	3.327	4.2465			13.2841				7.0255	4D	10	8.5	11.5	2305880_4ds_1018	C/T	C	T	chr4D_62796253	2291802_4ds_4808	C/T	C	T	chr4D_78836923	NA	NA	NA	NA	NA	NA	NA	NA	NA	NA	NA	NA	NA	NA	NA	NA	NA	NA
154	111	Consistent	Qtw.tamu.4D.63	4D	62.7963	TW	12EP3	Ind Env-ADD	3.327	6.1762			15.1868				6.9467	4D	10	8.5	11.5	2305880_4ds_1018	C/T	C	T	chr4D_62796253	2291802_4ds_4808	C/T	C	T	chr4D_78836923	NA	NA	NA	NA	NA	NA	NA	NA	NA	NA	NA	NA	NA	NA	NA	NA	NA	NA
155	112	Consistent	Qtw.tamu.4D.63	4D	62.7963	TW	13EP2	Ind Env-ADD	3.327	7.8313			16.3128				10.351	4D	11	10.5	11.5	2305880_4ds_1018	C/T	C	T	chr4D_62796253	2291802_4ds_4808	C/T	C	T	chr4D_78836923	NA	NA	NA	NA	NA	NA	NA	NA	NA	NA	NA	NA	NA	NA	NA	NA	NA	NA
156	113	Consistent	Qtw.tamu.4D.63	4D	62.7963	TW	14CH	Ind Env-ADD	3.327	4.8228			12.0263				8.3245	4D	11	10.5	11.5	2305880_4ds_1018	C/T	C	T	chr4D_62796253	2291802_4ds_4808	C/T	C	T	chr4D_78836923	NA	NA	NA	NA	NA	NA	NA	NA	NA	NA	NA	NA	NA	NA	NA	NA	NA	NA
69	114	Consistent	Qtw.tamu.4D.63	4D	62.7963	TW	across all env	Multi Env-ADD	11.479	35.584	18.5659	17.0181	5.5978	2.4406	3.1572	-0.7166	2.8906	4D	11	10.5	11.5	2305880_4ds_1018	C/T	C	T	chr4D_62796253	2291802_4ds_4808	C/T	C	T	chr4D_78836923	-3.2612	0.3903	-0.2965	3.9968	1.4902	3.6078	-2.2139	-2.9677	-3.0453	7.3411	-2.413	0.8501	-2.6641	5.2468	-3.0991	-3.2694	3.7363	-3.3126
63	115	Consistent	Qtw.tamu.4D.63	4D	62.7963	TW	AcrossME2	Within ME_ADD	8.6675	24.9854	14.6052	10.3801	7.9553	3.619	4.3363	-0.7173	3.1825	4D	11	10.5	11.5	2305880_4ds_1018	C/T	C	T	chr4D_62796253	2291802_4ds_4808	C/T	C	T	chr4D_78836923	-3.5539	-0.5895	3.7008	3.3145	7.0502	0.5573	-2.9571	-3.3915	-3.5626	3.4446	-3.6033	-0.4095	NA	NA	NA	NA	NA	NA
157	116	Consistent/Pleiotropic	Qtw.tamu.4D.110	4D	109.804	TW	12UV5	Ind Env-ADD	3.327	3.5056			9.8702				6.7591	4D	13	11.5	13.5	2279925_4ds_1008	C/T	T	C	chr4D_109804326	IWB3253	T/C	T	C	chr4D_121181672	NA	NA	NA	NA	NA	NA	NA	NA	NA	NA	NA	NA	NA	NA	NA	NA	NA	NA
158	117	Consistent/Pleiotropic	Qtw.tamu.4D.110	4D	109.804	TW	13EP3	Ind Env-ADD	3.327	6.0211			19.3816				8.0056	4D	13	11.5	13.5	2279925_4ds_1008	C/T	T	C	chr4D_109804326	IWB3253	T/C	T	C	chr4D_121181672	NA	NA	NA	NA	NA	NA	NA	NA	NA	NA	NA	NA	NA	NA	NA	NA	NA	NA
137	118	Consistent/Pleiotropic	Qtw.tamu.4D.110	4D	109.804	TW	across all env	Multi Env-ADD	11.479	14.8789	4.8438	10.0352	2.4424	0.6349	1.8075	-1.1726	1.4742	4D	13	12.5	13.5	2279925_4ds_1008	C/T	T	C	chr4D_109804326	IWB3253	T/C	T	C	chr4D_121181672	-2.0483	-1.656	1.1846	-1.1969	2.4792	-1.7187	-0.2593	-1.7303	5.2451	-1.064	6.5139	2.199	-1.2192	-1.8134	-1.8531	-1.7463	-1.4996	-1.665
60	119	Consistent/Pleiotropic	Qtw.tamu.4D.110	4D	109.804	TW	AcrossME1	Within ME_ADD	6.6226	11.4808	5.7124	5.7684	9.2846	3.8321	5.4525	-1.6204	2.7301	4D	13	12.5	13.5	2279925_4ds_1008	C/T	T	C	chr4D_109804326	IWB3253	T/C	T	C	chr4D_121181672	-2.9128	1.2252	-1.5122	-2.9869	3.994	5.2607	-3.0681	NA	NA	NA	NA	NA	NA	NA	NA	NA	NA	NA
159	123		Qtw.tamu.4D.366	4D	366.276	TW	12UVL	Ind Env-ADD	3.327	4.1616			10.8343				6.1104	4D	22	21.5	22.5	IWB10053	T/C	C	T	chr4D_366276069	14343865_4dl_v2_189	G/A	A	G	chr4D_378307126	NA	NA	NA	NA	NA	NA	NA	NA	NA	NA	NA	NA	NA	NA	NA	NA	NA	NA
114	127	Consistent	Qtw.tamu.5A.74	5A	73.834	TW	across all env	Multi Env-ADD	11.479	14.3799	9.4097	4.9702	1.6322	1.2285	0.4037	0.8248	2.0503	5A	40	39.5	40.5	IWB2928	T/C	C	T	chr5A_73833992	1538313_5as_2595	G/A	G	A	chr5A_103390773	0.2849	-0.188	-2.1991	1.5498	0.2968	-0.0172	0.826	-0.1763	0.319	0.6343	0.1709	1.1694	-0.8483	-0.8416	0.2438	-0.1861	1.9349	-3.2899
102	128	Consistent	Qtw.tamu.5A.74	5A	73.834	TW	AcrossME2	Within ME_ADD	8.6675	10.0693	5.9731	4.0962	2.1829	1.4519	0.731	0.7209	2.0152	5A	40	38.5	41.5	IWB2928	T/C	C	T	chr5A_73833992	1538313_5as_2595	G/A	G	A	chr5A_103390773	0.3196	-2.1633	1.5826	0.017	0.6678	1.2016	-0.8135	0.2785	-0.1519	1.9682	-3.256	0.3495	NA	NA	NA	NA	NA	NA
125	129	Consistent	Qtw.tamu.5A.157	5A	157.322	TW	across all env	Multi Env-ADD	11.479	13.5249	8.7046	4.8203	1.5306	1.1352	0.3954	0.7398	1.9703	5A	43	42.5	43.5	1500192_5as_1232	G/C	C	G	chr5A_157322074	1509801_5as_20912	G/A	G	A	chr5A_234496621	0.6377	-0.3069	-1.9707	1.3494	0.116	0.3626	0.3797	-0.6743	0.7329	1.0894	0.0615	1.0007	-0.5791	-0.9923	0.312	-0.278	2.0054	-3.2394
100	130	Consistent	Qtw.tamu.5A.157	5A	157.322	TW	AcrossME2	Within ME_ADD	8.6675	10.113	6.0454	4.0676	2.1683	1.4702	0.6981	0.7721	2.0273	5A	43	42.5	43.5	1500192_5as_1232	G/C	C	G	chr5A_157322074	1509801_5as_20912	G/A	G	A	chr5A_234496621	0.5807	-2.0277	1.2925	0.3056	1.0325	0.9438	-0.6361	0.255	-0.3349	1.9484	-3.2964	-0.0634	NA	NA	NA	NA	NA	NA
105	132	Consistent	Qtw.tamu.5A.702	5A	702	TW	across all env	Multi Env-ADD	11.479	14.5107	11.0703	3.4404	1.6664	1.437	0.2293	1.2077	2.2187	5A	194	192.5	194.5	IWB28861	A/G	G	A	chr5A_701999757	IWB10235	T/C	C	T	chr5A_702461315	0.2701	-0.4891	-0.9439	0.7409	1.2412	0.6915	0.9784	1.381	-0.2424	0.3044	1.0085	0.0704	-0.5815	-0.7996	-1.2781	-0.1179	0.5929	-1.6845
62	133	Consistent	Qtw.tamu.5A.702	5A	702	TW	AcrossME1	Within ME_ADD	6.6226	6.8367	5.5406	1.296	3.9991	3.6318	0.3673	3.2645	2.659	5A	194	192.5	194.5	IWB28861	A/G	G	A	chr5A_701999757	IWB10235	T/C	C	T	chr5A_702461315	-0.9274	0.8016	0.5361	0.9412	-0.6809	0.5704	-1.241	NA	NA	NA	NA	NA	NA	NA	NA	NA	NA	NA
87	134	Consistent	Qtw.tamu.5B.589	5B	589.373	TW	across all env	Multi Env-ADD	11.479	16.5776	13.3862	3.1914	2.3072	1.7242	0.583	1.1412	-2.4398	5B	75	74.5	75.5	IWB26282	A/G	A	G	chr5B_589373406	10847826_5bl_4955	C/T	C	T	chr5B_589465483	0.8277	1.2002	1.0481	0.4898	-0.8681	-0.165	-0.6781	-0.1378	-1.0626	-0.203	-1.8298	-1.9694	0.3853	1.4628	1.4567	0.3882	0.0878	2.982
61	135	Consistent	Qtw.tamu.5B.589	5B	589.373	TW	AcrossME1	Within ME_ADD	6.6226	6.7679	5.7534	1.0145	4.3888	3.751	0.6378	3.1132	-2.7129	5B	75	69.5	76.5	IWB26282	A/G	A	G	chr5B_589373406	10847826_5bl_4955	C/T	C	T	chr5B_589465483	1.4739	-0.5941	-0.4033	0.1373	-0.79	-1.5572	1.7333	NA	NA	NA	NA	NA	NA	NA	NA	NA	NA	NA
82	136	Consistent	Qtw.tamu.5B.589	5B	589.373	TW	AcrossME2	Within ME_ADD	8.6675	9.8098	7.6533	2.1565	2.6898	1.8438	0.846	0.9978	-2.2812	5B	75	72.5	75.5	IWB26282	A/G	A	G	chr5B_589373406	10847826_5bl_4955	C/T	C	T	chr5B_589465483	0.6692	0.8894	0.3307	-0.324	-0.3603	-2.1303	0.2252	1.2966	0.2282	-0.0718	2.8219	-3.5747	NA	NA	NA	NA	NA	NA
103	137	Consistent	Qtw.tamu.5B.646	5B	645.985	TW	across all env	Multi Env-ADD	11.479	14.3828	11.1831	3.1997	1.9707	1.4496	0.5211	0.9285	-2.2305	5B	94	90.5	94.5	10851545_5bl_762	A/G	A	G	chr5B_645984602	9534166_5bl_2211	T/C	T	C	chr5B_650121557	-0.0348	1.2308	1.649	-2.0764	-1.9937	0.0126	1.5829	-0.6012	1.0467	0.5136	-0.4866	-2.366	1.9917	0.7645	1.1281	0.266	-0.7999	0.3509
77	138	Consistent	Qtw.tamu.5B.646	5B	645.985	TW	AcrossME2	Within ME_ADD	8.6675	9.8613	8.1987	1.6626	2.6862	1.9875	0.6987	1.2888	-2.3615	5B	94	90.5	94.5	10851545_5bl_762	A/G	A	G	chr5B_645984602	9534166_5bl_2211	T/C	T	C	chr5B_650121557	0.0937	1.7772	-1.9479	0.1412	0.6415	-2.2378	2.121	1.2579	0.3946	-0.6705	0.4806	-2.0514	NA	NA	NA	NA	NA	NA
97	139	Consistent	Qtw.tamu.6A.7	6A	7.19224	TW	across all env	Multi Env-ADD	11.479	14.9619	11.4414	3.5205	2.066	1.4865	0.5795	0.907	2.2598	6A	12	11.5	12.5	4348240_6as_16935	T/C	T	C	chr6A_7192241	4416880_6as_1703	T/C	T	C	chr6A_7522660	0.5119	-1.8784	-1.8955	0.3968	0.3246	0.0081	0.6556	0.4391	1.6598	3.729	-0.4724	-1.647	-1.5306	2.0425	-0.556	-0.5234	0.7908	-1.2752
101	140	Consistent	Qtw.tamu.6A.7	6A	7.19224	TW	AcrossME2	Within ME_ADD	8.6675	9.1582	5.9985	3.1597	2.2309	1.4668	0.7641	0.7027	2.0295	6A	12	11.5	12.5	4348240_6as_16935	T/C	T	C	chr6A_7192241	4416880_6as_1703	T/C	T	C	chr6A_7522660	0.7465	-1.6634	0.6282	0.2394	3.9558	-1.4151	-1.2992	-0.3244	-0.2928	1.0207	-1.0502	-0.5457	NA	NA	NA	NA	NA	NA
110	143		Qtw.tamu.6A.10	6A	9.89272	TW	across all env	Multi Env-ADD	11.479	13.9736	10.3657	3.6079	1.779	1.3415	0.4375	0.904	2.1452	6A	17	16.5	18.5	4426950_6as_3288	C/T	T	C	chr6A_9892720	4427869_6as_4535	G/A	A	G	chr6A_10982847	0.1813	-2.1363	-1.4989	-0.5705	1.1372	0.5723	1.0583	1.3871	2.5827	-1.9154	0.9374	-0.639	-1.1256	1.0049	-0.4914	-0.7138	0.9023	0.3673
160	144	Consistent/Pleiotropic	Qtw.tamu.6A.12	6A	12.42	TW	12BD	Ind Env-ADD	3.327	4.0921			8.5453				3.5836	6A	20	19.5	20.5	4344525_6as_6773	G/C	C	G	chr6A_12419954	4414591_6as_1756	T/G	G	T	chr6A_12459433	NA	NA	NA	NA	NA	NA	NA	NA	NA	NA	NA	NA	NA	NA	NA	NA	NA	NA
94	145	Consistent/Pleiotropic	Qtw.tamu.6A.12	6A	12.42	TW	across all env	Multi Env-ADD	11.479	17.916	12.0874	5.8286	1.9778	1.5702	0.4076	1.1626	2.3194	6A	20	19.5	20.5	4344525_6as_6773	G/C	C	G	chr6A_12419954	4414591_6as_1756	T/G	G	T	chr6A_12459433	0.0289	1.2037	-1.2557	-0.547	0.6627	0.7297	0.7992	1.1841	2.7679	-1.9123	0.8232	-0.4757	-1.507	0.6092	-0.7586	-0.9392	0.6188	-0.1726
57	146	Consistent/Pleiotropic	Qtw.tamu.6A.12	6A	12.42	TW	AcrossME1	Within ME_ADD	6.6226	11.7092	9.4635	2.2457	6.4322	6.1841	0.2482	5.9359	3.4697	6A	20	19.5	20.5	4344525_6as_6773	G/C	C	G	chr6A_12419954	4414591_6as_1756	T/G	G	T	chr6A_12459433	0.0535	-0.4873	-0.3512	0.034	1.6181	-0.3264	-0.5409	NA	NA	NA	NA	NA	NA	NA	NA	NA	NA	NA
161	148	Consistent	Qtw.tamu.6A.603	6A	603.282	TW	12UV7	Ind Env-ADD	3.327	19.9872			11.566				16.5761	6A	134	133.5	134.5	IWB11675	A/G	G	A	chr6A_603282410	5803753_6al_10143	T/C	T	C	chr6A_604122360	NA	NA	NA	NA	NA	NA	NA	NA	NA	NA	NA	NA	NA	NA	NA	NA	NA	NA
138	149	Consistent	Qtw.tamu.6A.603	6A	603.282	TW	across all env	Multi Env-ADD	11.479	24.4146	0.0137	24.4009	4.8461	0.0018	4.8443	-4.8425	-0.0778	6A	134	133.5	134.5	IWB11675	A/G	G	A	chr6A_603282410	5803753_6al_10143	T/C	T	C	chr6A_604122360	-0.6368	0.6846	0.515	-0.2415	-2.0499	-1.534	16.6539	-2.6205	-1.1892	-2.245	0.6137	-2.2509	0.2226	-1.4877	-0.5415	0.3491	-2.4269	-0.2326
131	150	Consistent	Qtw.tamu.6A.603	6A	603.282	TW	AcrossME1	Within ME_ADD	6.6226	21.906	1.5981	20.3079	21.3964	1.062	20.3344	-19.2724	1.4372	6A	134	133.5	134.5	IWB11675	A/G	G	A	chr6A_603282410	5803753_6al_10143	T/C	T	C	chr6A_604122360	-0.8304	-3.5649	15.1389	-4.1355	-2.7042	-0.9013	-3.0027	NA	NA	NA	NA	NA	NA	NA	NA	NA	NA	NA
162	151	Consistent/Pleiotropic	Qtw.tamu.6A.609	6A	608.501	TW	13EP5	Ind Env-ADD	3.327	4.5535			5.8026				-5.185	6A	139	138.5	139.5	IWB45148	T/C	T	C	chr6A_608501002	5782872_6al_2665	T/C	T	C	chr6A_608572839	NA	NA	NA	NA	NA	NA	NA	NA	NA	NA	NA	NA	NA	NA	NA	NA	NA	NA
126	152	Consistent/Pleiotropic	Qtw.tamu.6A.609	6A	608.501	TW	across all env	Multi Env-ADD	11.479	13.9868	8.647	5.3398	1.744	1.1244	0.6196	0.5048	-1.9611	6A	139	138.5	139.5	IWB45148	T/C	T	C	chr6A_608501002	5782872_6al_2665	T/C	T	C	chr6A_608572839	0.4696	2.0461	1.8637	-0.4501	-1.1168	-0.7775	1.9762	-1.2292	0.1993	-0.4437	0.9808	-1.0218	-3.2236	-0.6784	1.0864	1.7506	-2.2339	1.464
90	153	Consistent/Pleiotropic	Qtw.tamu.6A.609	6A	608.501	TW	AcrossME2	Within ME_ADD	8.6675	10.6497	6.7083	3.9414	2.4632	1.6417	0.8215	0.8202	-2.1424	6A	139	138.5	139.5	IWB45148	T/C	T	C	chr6A_608501002	5782872_6al_2665	T/C	T	C	chr6A_608572839	0.6513	2.0452	-0.2686	-0.5966	-0.262	-0.8405	-3.042	1.2679	1.9321	-2.053	1.6463	-0.4799	NA	NA	NA	NA	NA	NA
163	156	Consistent	Qtw.tamu.6A.612	6A	611.567	TW	12CH	Ind Env-ADD	3.327	6.6224			10.1217				-6.4713	6A	143	142.5	143.5	IWB67460	A/G	G	A	chr6A_611567367	IWB26625	T/C	C	T	chr6A_612107764	NA	NA	NA	NA	NA	NA	NA	NA	NA	NA	NA	NA	NA	NA	NA	NA	NA	NA
133	157	Consistent	Qtw.tamu.6A.612	6A	611.567	TW	across all env	Multi Env-ADD	11.479	14.4492	7.6768	6.7725	1.7732	1.0054	0.7678	0.2376	-1.8544	6A	143	142.5	143.5	IWB67460	A/G	G	A	chr6A_611567367	IWB26625	T/C	C	T	chr6A_612107764	0.6405	2.2309	-4.5853	-0.0637	-1.2431	-0.4904	1.3903	-1.0307	-0.4436	0.0113	1.0782	-0.6605	1.9665	-0.1828	1.1365	1.8388	-2.0444	1.6478
104	158	Consistent	Qtw.tamu.6A.612	6A	611.567	TW	AcrossME2	Within ME_ADD	8.6675	11.4043	5.8569	5.5474	2.5934	1.439	1.1544	0.2846	-2.0059	6A	143	142.5	143.5	IWB67460	A/G	G	A	chr6A_611567367	IWB26625	T/C	C	T	chr6A_612107764	0.7887	-4.4357	0.0854	-0.3424	0.1672	-0.5113	2.1198	1.2883	1.9894	-1.8946	1.7936	-1.0486	NA	NA	NA	NA	NA	NA
165	160	Consistent	Qtw.tamu.6B.130	6B	130.302	TW	12UVL	Ind Env-ADD	3.327	6.5106			17.567				7.8796	6B2	1	0	2.5	IWB38972	T/G	G	T	chr6B_130301984	IWB29373	A/C	C	A	chr6B_159372629	NA	NA	NA	NA	NA	NA	NA	NA	NA	NA	NA	NA	NA	NA	NA	NA	NA	NA
164	159	Consistent	Qtw.tamu.6B.130	6B	130.302	TW	14EP4	Ind Env-ADD	3.327	4.9514			13.6983				3.8175	6B2	0	0	0.5	IWB38972	T/G	G	T	chr6B_130301984	IWB29373	A/C	C	A	chr6B_159372629	NA	NA	NA	NA	NA	NA	NA	NA	NA	NA	NA	NA	NA	NA	NA	NA	NA	NA
136	161	Consistent	Qtw.tamu.6B.130	6B	130.302	TW	across all env	Multi Env-ADD	11.479	15.1069	5.7661	9.3408	2.379	0.7564	1.6226	-0.8662	1.6372	6B2	1	0	2.5	IWB38972	T/G	G	T	chr6B_130301984	IWB29373	A/C	C	A	chr6B_159372629	-1.8358	-1.5552	-1.7388	2.5063	1.2255	-1.8058	-1.4673	6.0906	4.9676	-1.7226	1.5326	1.7323	-0.5626	-2.0389	-1.506	-1.4527	-1.8487	-1.7996
59	162	Consistent	Qtw.tamu.6B.130	6B	130.302	TW	AcrossME1	Within ME_ADD	6.6226	11.7434	6.145	5.5984	8.6801	4.1669	4.5131	-0.3462	2.8961	6B2	1	0	2.5	IWB38972	T/G	G	T	chr6B_130301984	IWB29373	A/C	C	A	chr6B_159372629	-2.8173	-0.0318	-2.7282	4.8508	3.7231	0.2802	-3.2769	NA	NA	NA	NA	NA	NA	NA	NA	NA	NA	NA
166	163	Consistent	Qtw.tamu.6B.466	6B	465.954	TW	11EP5	Ind Env-ADD	3.327	5.5306			11.7688				6.312	6B2	6	5.5	6.5	4352366_6bl_1112	G/A	G	A	chr6B_465954358	IWB21830	A/G	A	G	chr6B_530569320	NA	NA	NA	NA	NA	NA	NA	NA	NA	NA	NA	NA	NA	NA	NA	NA	NA	NA
169	167	Consistent	Qtw.tamu.6B.466	6B	465.954	TW	12BD	Ind Env-ADD	3.327	4.9867			10.4627				4.0144	6B2	7	6.5	7.5	4352366_6bl_1112	G/A	G	A	chr6B_465954358	IWB21830	A/G	A	G	chr6B_530569320	NA	NA	NA	NA	NA	NA	NA	NA	NA	NA	NA	NA	NA	NA	NA	NA	NA	NA
170	168	Consistent	Qtw.tamu.6B.466	6B	465.954	TW	13EP2	Ind Env-ADD	3.327	4.4983			9.015				7.7736	6B2	7	6.5	7.5	4352366_6bl_1112	G/A	G	A	chr6B_465954358	IWB21830	A/G	A	G	chr6B_530569320	NA	NA	NA	NA	NA	NA	NA	NA	NA	NA	NA	NA	NA	NA	NA	NA	NA	NA
171	169	Consistent	Qtw.tamu.6B.466	6B	465.954	TW	14CH	Ind Env-ADD	3.327	3.817			9.2693				7.397	6B2	7	6.5	7.5	4352366_6bl_1112	G/A	G	A	chr6B_465954358	IWB21830	A/G	A	G	chr6B_530569320	NA	NA	NA	NA	NA	NA	NA	NA	NA	NA	NA	NA	NA	NA	NA	NA	NA	NA
167	164	Consistent	Qtw.tamu.6B.466	6B	465.954	TW	17BD	Ind Env-ADD	3.327	3.7798			10.0217				6.1123	6B2	6	5.5	6.5	4352366_6bl_1112	G/A	G	A	chr6B_465954358	IWB21830	A/G	A	G	chr6B_530569320	NA	NA	NA	NA	NA	NA	NA	NA	NA	NA	NA	NA	NA	NA	NA	NA	NA	NA
98	170	Consistent	Qtw.tamu.6B.466	6B	465.954	TW	across all env	Multi Env-ADD	11.479	23.9424	11.4185	12.5239	3.4385	1.4781	1.9605	-0.4824	2.275	6B2	7	6.5	7.5	4352366_6bl_1112	G/A	G	A	chr6B_465954358	IWB21830	A/G	A	G	chr6B_530569320	-2.0463	1.726	-2.5936	2.5198	1.4035	2.5836	-3.0686	-2.0404	-2.2745	5.3137	1.3831	1.4773	-2.3476	5.0196	-1.9032	-2.1459	-1.8166	-2.5343
56	166	Consistent	Qtw.tamu.6B.466	6B	465.954	TW	Across ME12	Across ME-ADD	4.1448	5.8594	3.4267	2.4327	13.1628	6.7645	6.3983	0.3662	2.6718	6B2	6	5.5	6.5	4352366_6bl_1112	G/A	G	A	chr6B_465954358	IWB21830	A/G	A	G	chr6B_530569320	2.5984	-2.5984	NA	NA	NA	NA	NA	NA	NA	NA	NA	NA	NA	NA	NA	NA	NA	NA
64	171	Consistent	Qtw.tamu.6B.466	6B	465.954	TW	AcrossME1	Within ME_ADD	6.6226	11.8156	5.0205	6.795	6.9622	3.3503	3.6119	-0.2616	2.5821	6B2	7	6.5	7.5	4352366_6bl_1112	G/A	G	A	chr6B_465954358	IWB21830	A/G	A	G	chr6B_530569320	1.4206	1.0982	-3.385	-2.3491	-2.58	1.0719	4.7233	NA	NA	NA	NA	NA	NA	NA	NA	NA	NA	NA
168	165	Consistent	Qtw.tamu.6B.466	6B	465.954	TW	ME1	Ind ME_ADD	3.3817	5.8573			15.3676				5.2702	6B2	6	5.5	6.5	4352366_6bl_1112	G/A	G	A	chr6B_465954358	IWB21830	A/G	A	G	chr6B_530569320	NA	NA	NA	NA	NA	NA	NA	NA	NA	NA	NA	NA	NA	NA	NA	NA	NA	NA
172	172	Consistent	Qtw.tamu.6B.559	6B	559.357	TW	13EP5	Ind Env-ADD	3.327	10.448			15.3747				8.549	6B2	8	7.5	8.5	IWB14861	A/G	G	A	chr6B_559357017	4253435_6bl_1207	T/C	T	C	chr6B_561993358	NA	NA	NA	NA	NA	NA	NA	NA	NA	NA	NA	NA	NA	NA	NA	NA	NA	NA
58	175	Consistent	Qtw.tamu.6B.559	6B	559.357	TW	Across ME12	Across ME-ADD	4.1448	4.1635	2.4212	1.7423	8.2497	4.8216	3.4281	1.3935	2.2617	6B2	8	7.5	8.5	IWB14861	A/G	G	A	chr6B_559357017	4253435_6bl_1207	T/C	T	C	chr6B_561993358	-1.907	1.907	NA	NA	NA	NA	NA	NA	NA	NA	NA	NA	NA	NA	NA	NA	NA	NA
119	173	Consistent	Qtw.tamu.6B.559	6B	559.357	TW	AcrossME2	Within ME_ADD	8.6675	15.1794	4.9504	10.229	3.7427	1.2039	2.5388	-1.3349	1.8593	6B2	8	7.5	8.5	IWB14861	A/G	G	A	chr6B_559357017	4253435_6bl_1207	T/C	T	C	chr6B_561993358	-1.6038	-2.3252	2.9084	-1.8069	-1.9112	1.7636	6.595	-1.4885	-1.6862	-1.3404	-1.8182	2.7134	NA	NA	NA	NA	NA	NA
173	174	Consistent	Qtw.tamu.6B.559	6B	559.357	TW	ME2	Ind ME_ADD	3.3817	4.1368			13.44				4.1808	6B2	8	7.5	8.5	IWB14861	A/G	G	A	chr6B_559357017	4253435_6bl_1207	T/C	T	C	chr6B_561993358	NA	NA	NA	NA	NA	NA	NA	NA	NA	NA	NA	NA	NA	NA	NA	NA	NA	NA
174	177		Qtw.tamu.6D.458	6D	458.489	TW	12BD	Ind Env-ADD	3.327	4.3385			9.0038				-3.6832	6D	96	95.5	96.5	3290494_6dl_50	G/A	A	G	chr6D_458488610	IWB63658	T/C	T	C	chr6D_458765146	NA	NA	NA	NA	NA	NA	NA	NA	NA	NA	NA	NA	NA	NA	NA	NA	NA	NA
175	178	Consistent	Qtw.tamu.6D.459	6D	459.238	TW	12UV5	Ind Env-ADD	3.327	3.9568			11.2677				-7.2285	6D	97	96.5	97.5	IWB24926	A/G	G	A	chr6D_459237590	IWB25189	A/G	G	A	chr6D_461316144	NA	NA	NA	NA	NA	NA	NA	NA	NA	NA	NA	NA	NA	NA	NA	NA	NA	NA
75	179	Consistent	Qtw.tamu.6D.459	6D	459.238	TW	across all env	Multi Env-ADD	11.479	21.3428	15.8423	5.5005	3.1305	2.0872	1.0433	1.0439	-2.6727	6D	97	96.5	97.5	IWB24926	A/G	G	A	chr6D_459237590	IWB25189	A/G	G	A	chr6D_461316144	0.4252	2.7056	-0.2811	-0.2214	-0.8206	2.8422	1.6007	-1.8174	-4.5558	-0.6564	-2.7096	-1.6053	0.4767	-1.3229	1.2841	1.5402	-0.8302	2.0544
106	182	Consistent	Qtw.tamu.6D.459	6D	459.238	TW	across all env	Multi Env-ADD	11.479	17.124	11.0293	6.0947	2.1316	1.4243	0.7073	0.717	-2.2097	6D	99	98.5	99.5	IWB24926	A/G	G	A	chr6D_459237590	IWB25189	A/G	G	A	chr6D_461316144	-0.1666	1.9764	-0.7033	-1.4296	-1.9896	-2.358	0.5639	2.395	2.5942	-0.779	2.1573	-1.8741	-0.2572	-1.52	0.6089	1.0803	-1.7288	1.2608
55	180	Consistent	Qtw.tamu.6D.459	6D	459.238	TW	AcrossME1	Within ME_ADD	6.6226	11.9735	10.1241	1.8494	9.6004	6.8924	2.7079	4.1845	-3.6612	6D	97	96.5	97.5	IWB24926	A/G	G	A	chr6D_459237590	IWB25189	A/G	G	A	chr6D_461316144	3.6942	0.168	2.5893	-0.8289	-3.5672	-1.721	-0.3343	NA	NA	NA	NA	NA	NA	NA	NA	NA	NA	NA
68	183	Consistent	Qtw.tamu.6D.459	6D	459.238	TW	AcrossME2	Within ME_ADD	8.6675	13.6465	10.9033	2.7432	3.1047	2.6502	0.4544	2.1958	-2.7252	6D	99	97.5	99.5	IWB24926	A/G	G	A	chr6D_459237590	IWB25189	A/G	G	A	chr6D_461316144	0.3479	-0.1879	-0.9122	-1.8451	-0.2652	-1.3597	0.2567	1.1233	1.5949	-1.2158	1.7735	0.6897	NA	NA	NA	NA	NA	NA
176	181	Consistent	Qtw.tamu.6D.459	6D	459.238	TW	ME1	Ind ME_ADD	3.3817	4.0135			10.2451				-4.2555	6D	97	96.5	97.5	IWB24926	A/G	G	A	chr6D_459237590	IWB25189	A/G	G	A	chr6D_461316144	NA	NA	NA	NA	NA	NA	NA	NA	NA	NA	NA	NA	NA	NA	NA	NA	NA	NA
109	184		Qtw.tamu.7A.19	7A	18.7713	TW	across all env	Multi Env-ADD	11.479	11.7856	10.5112	1.2744	1.5248	1.3618	0.163	1.1988	2.1603	7A1	15	13.5	19.5	7099598_4al_2268	C/T	C	T	chr7A_18771267	4233079_7as_7152	A/T	T	A	chr7A_56975589	0.1882	-1.3143	0.0515	0.348	0.0293	-0.4496	0.0135	-0.8802	-0.9106	0.6185	0.8625	1.0517	-0.2093	0.59	-0.5741	-0.8435	0.1873	-0.4863
177	188	Consistent	Qtw.tamu.7B.9	7B	8.52114	TW	12CH	Ind Env-ADD	3.327	3.5148			5.3559				-4.7845	7B1	21	17.5	24.5	IWB6455	A/C	A	C	chr7B_8521139	IWA1089	A/C	A	C	chr7B_15592759	NA	NA	NA	NA	NA	NA	NA	NA	NA	NA	NA	NA	NA	NA	NA	NA	NA	NA
134	186	Consistent	Qtw.tamu.7B.9	7B	8.52114	TW	across all env	Multi Env-ADD	11.479	17.3184	7.5298	9.7886	1.8558	0.963	0.8929	0.0701	-1.8558	7B1	19	17.5	21.5	IWB6455	A/C	A	C	chr7B_8521139	IWA1089	A/C	A	C	chr7B_15592759	-0.4022	1.3157	-2.5707	-1.9127	-2.1927	-0.8104	1.3448	1.6971	3.0754	0.8044	0.4771	2.7873	-2.1849	2.1934	0.3227	0.2534	-2.0603	0.3407
72	187	Consistent	Qtw.tamu.7B.9	7B	8.52114	TW	AcrossME2	Within ME_ADD	8.6675	15.0029	9.4744	5.5286	3.059	2.2258	0.8332	1.3926	-2.542	7B1	20	17.5	22.5	IWB6455	A/C	A	C	chr7B_8521139	IWA1089	A/C	A	C	chr7B_15592759	0.1289	-1.923	-1.2039	0.0142	1.092	3.4637	-1.4265	1.0039	0.9353	-1.4371	1.1728	-1.8203	NA	NA	NA	NA	NA	NA
115	195	Consistent	Qtw.tamu.7B.64	7B	64.4712	TW	across all env	Multi Env-ADD	11.479	13.0063	9.4541	3.5522	1.6874	1.2285	0.4589	0.7696	-2.0531	7B1	48	47.5	48.5	3136917_7bs_1218	G/A	G	A	chr7B_64471203	3066891_7bs_4267	C/T	T	C	chr7B_65837074	-0.0746	1.1372	0.6994	-1.4772	-2.3506	0.1326	0.6135	1.2587	0.2772	-0.1441	-0.5048	2.0809	-0.5124	1.4299	0.3609	0.6807	-1.198	0.6012
84	196	Consistent	Qtw.tamu.7B.64	7B	64.4712	TW	AcrossME2	Within ME_ADD	8.6675	9.2229	7.1653	2.0576	2.2873	1.7385	0.5488	1.1897	-2.2083	7B1	48	47.5	49.5	3136917_7bs_1218	G/A	G	A	chr7B_64471203	3066891_7bs_4267	C/T	T	C	chr7B_65837074	0.0801	0.8545	-1.3232	0.2878	0.0125	2.2356	-0.3571	0.5156	0.8354	-1.0428	0.757	-2.8555	NA	NA	NA	NA	NA	NA
111	198		Qtw.tamu.7B.707	7B	707.364	TW	across all env	Multi Env-ADD	11.479	13.9526	10.3638	3.5889	1.9733	1.3341	0.6392	0.6949	2.1389	7B2	1	0	2.5	6728417_7bl_5629	A/G	A	G	chr7B_707364034	IWB8556	T/C	C	T	chr7B_708558531	-1.0498	-1.59	-1.2885	2.2086	0.975	-0.4954	-1.9166	-1.6457	-1.0771	0.2136	0.8692	1.9442	-1.6447	2.9186	-0.7266	0.186	1.2191	-1.0469
[truncated: 80 more rows]
[truncated: 10 more columns]

## Sheet: Table S5
		Supplementary Table S5. Addittive-by-additive, Additive-by-environment, additive-by-additive-by-environment interaction effects on agronomictraits
[truncated: 1,197 more rows]
[truncated: 87 more columns]
